# Supplementary material for: Transcriptomic plasticity of the hypothalamic osmoregulatory control centre of the Arabian dromedary camel
Source: Research Square preprint supplement (doi:10.21203/rs.3.rs-1626513/v1), 2022-05-26
Supplement: Supplementary file 2 [file 1fa15aa7be19ad2e62d147bc.xlsx]

## Sheet: a
Differential expression (DE) analysis of camel SON: WD vs control (original results without any filtering, 22444 genes in total)
external_gene_name	ensembl_gene_id	baseMean	log2FoldChange	lfcSE	stat	pvalue	padj	CON13	CON2	CON3	CON4	CON5	WD15	WD6	WD7	WD8	WD9	description
VGF	ENSCDRG00005014790	1986.25	3.99734	0.331897	12.0439	2.08795e-33	3.43404e-29	199.472	237.067	308.018	125.173	297.079	4812.38	6570.32	3367.42	1685.56	2260.06	VGF nerve growth factor inducible [Source:HGNC Symbol;Acc:HGNC:12684]
PCSK1	ENSCDRG00005011495	2691.74	2.01928	0.21535	9.37673	6.8053e-21	5.59634e-17	897.622	743.799	1111.3	1231.5	1331.73	3774.01	3614	5597.36	2992.33	5623.73	proprotein convertase subtilisin/kexin type 1 [Source:HGNC Symbol;Acc:HGNC:8743]
PDYN	ENSCDRG00005011753	1824.73	1.92686	0.212562	9.06492	1.2469e-19	6.83594e-16	753.559	565.999	534.046	883.86	1057.88	2656.37	3277.51	3532.03	2045.01	2941.06	prodynorphin [Source:NCBI gene;Acc:105096049]
ENSCDRG00005020459	ENSCDRG00005020459	125.829	2.98048	0.335692	8.87862	6.76978e-19	2.78356e-15	11.0818	31.609	53.183	18.038	21.1712	288.327	303.716	171.124	141.776	218.266	nan
CITED1	ENSCDRG00005009756	105.42	2.13528	0.279799	7.63149	2.32063e-14	7.63349e-11	77.5723	32.5968	37.6713	29.5167	35.5129	142.677	235.981	196.586	114.566	151.517	Cbp/p300 interacting transactivator with Glu/Asp rich carboxy-terminal domain 1 [Source:HGNC Symbol;Acc:HGNC:1986]
GP2	ENSCDRG00005018907	97.5318	1.54509	0.204177	7.56741	3.80741e-14	1.04368e-10	49.8679	41.4868	53.183	49.1945	55.3182	139.705	135.47	182.375	147.504	121.213	glycoprotein 2 [Source:HGNC Symbol;Acc:HGNC:4441]
HR	ENSCDRG00005009395	167.875	-1.57266	0.21772	-7.22329	5.07443e-13	1.19227e-09	243.799	308.188	301.37	176.007	226.053	105.026	80.8453	75.7921	97.3814	64.2922	HR lysine demethylase and nuclear receptor corepressor [Source:HGNC Symbol;Acc:HGNC:5172]
ENSCDRG00005018077	ENSCDRG00005018077	123.54	1.83117	0.254968	7.18197	6.87135e-13	1.41266e-09	77.5723	72.108	36.5633	55.7537	39.6106	201.135	166.061	200.138	137.48	248.979	nan
AEN	ENSCDRG00005020430	191.902	-1.368	0.197998	-6.90918	4.87457e-12	8.90801e-09	221.635	208.422	319.098	335.069	289.567	104.035	128.915	97.7007	128.171	86.4055	apoptosis enhancing nuclease [Source:HGNC Symbol;Acc:HGNC:25722]
DGKG	ENSCDRG00005004703	100.448	-1.29413	0.189201	-6.83994	7.92246e-12	1.30301e-08	116.358	142.24	150.685	154.689	150.93	48.5499	43.7001	65.7259	67.3077	64.2922	diacylglycerol kinase gamma [Source:NCBI gene;Acc:105085854]
ARHGAP36	ENSCDRG00005010650	81.8497	-2.53646	0.377263	-6.72331	1.77646e-11	2.65613e-08	99.7358	82.9736	127.418	258.544	129.759	12.8806	24.0351	31.9748	14.3208	36.8554	Rho GTPase activating protein 36 [Source:HGNC Symbol;Acc:HGNC:26388]
PAM	ENSCDRG00005007464	1394.84	1.62916	0.246342	6.61338	3.75634e-11	5.14837e-08	470.975	653.911	705.783	818.814	745.771	1465.41	1577.58	2755.75	1485.78	3268.67	peptidylglycine alpha-amidating monooxygenase [Source:NCBI gene;Acc:105103083]
ENSCDRG00005009362	ENSCDRG00005009362	100.362	-1.33006	0.205172	-6.48265	9.0125e-11	1.05878e-07	182.849	138.289	149.577	126.812	131.125	69.357	32.7751	52.6992	58.7152	61.4257	nan
CREM	ENSCDRG00005016686	63.4059	1.77004	0.272918	6.48559	8.83837e-11	1.05878e-07	5.54088	37.5357	29.9154	27.8769	31.4153	92.1457	113.62	104.214	70.1719	121.623	cAMP responsive element modulator [Source:NCBI gene;Acc:105085973]
SDF2L1	ENSCDRG00005021974	95.2078	1.2922	0.200737	6.43729	1.21622e-10	1.33354e-07	44.327	50.3768	67.5867	58.4867	51.9035	125.833	124.545	162.835	116.714	149.469	stromal cell derived factor 2 like 1 [Source:NCBI gene;Acc:105095217]
FOXP4	ENSCDRG00005016769	170.441	-1.46118	0.232112	-6.29516	3.07083e-10	3.15662e-07	288.126	179.776	275.887	264.557	242.444	55.4856	107.065	106.583	115.282	69.2063	forkhead box P4 [Source:HGNC Symbol;Acc:HGNC:20842]
ETV5	ENSCDRG00005004646	129.346	1.65081	0.263662	6.26107	3.82355e-10	3.69918e-07	22.1635	81.9858	44.3192	56.3003	91.5141	155.558	246.906	198.362	185.454	210.895	ETS variant transcription factor 5 [Source:NCBI gene;Acc:105085855]
FOS	ENSCDRG00005001172	131.562	1.48043	0.238754	6.20064	5.6233e-10	5.13813e-07	77.5723	67.1691	73.1266	78.1645	54.6353	215.007	183.541	123.162	175.43	267.816	Fos proto-oncogene, AP-1 transcription factor subunit [Source:NCBI gene;Acc:105086086]
ENSCDRG00005008425	ENSCDRG00005008425	61.1614	-2.10693	0.34051	-6.18756	6.11025e-10	5.28922e-07	105.277	66.1813	83.0984	152.503	94.2458	17.8347	6.55502	34.3433	25.7774	25.7988	nan
RNF216	ENSCDRG00005018101	392.3	1.11681	0.183373	6.09038	1.12642e-09	9.26311e-07	232.717	224.226	231.568	283.688	259.518	441.903	659.872	552.453	383.081	653.979	ring finger protein 216 [Source:NCBI gene;Acc:105099392]
ADAMTS2	ENSCDRG00005005953	106.268	-2.08738	0.346289	-6.02786	1.66146e-09	1.30124e-06	310.289	91.8636	146.253	189.672	124.978	19.8163	54.6252	57.4362	35.802	31.9414	ADAM metallopeptidase with thrombospondin type 1 motif 2 [Source:HGNC Symbol;Acc:HGNC:218]
VWA5B1	ENSCDRG00005008541	146.326	-1.34567	0.224796	-5.98618	2.14824e-09	1.60601e-06	216.094	145.204	238.216	255.265	190.541	58.458	115.805	74.0157	93.0851	76.5773	von Willebrand factor A domain containing 5B1 [Source:HGNC Symbol;Acc:HGNC:26538]
SAT1	ENSCDRG00005021657	538.423	1.25096	0.213313	5.86443	4.50692e-09	3.22284e-06	227.176	236.08	299.154	459.148	357.178	880.834	535.327	770.355	738.953	880.025	spermidine/spermine N1-acetyltransferase 1 [Source:NCBI gene;Acc:105103961]
SEMA5A	ENSCDRG00005003914	652.246	-0.905898	0.15478	-5.8528	4.83366e-09	3.31246e-06	808.968	710.215	946.214	960.385	816.114	368.583	594.322	426.922	421.031	469.702	semaphorin 5A [Source:NCBI gene;Acc:105097686]
CD63	ENSCDRG00005004124	240.877	0.85003	0.147198	5.77472	7.70795e-09	5.07091e-06	110.818	179.776	191.68	189.672	169.369	316.07	275.311	340.472	307.181	328.423	CD63 molecule [Source:HGNC Symbol;Acc:HGNC:1692]
UCK2	ENSCDRG00005004673	320.347	0.932525	0.167368	5.5717	2.52266e-08	1.59577e-05	293.667	225.214	213.84	194.591	195.321	392.362	419.521	474.885	318.638	475.435	uridine-cytidine kinase 2 [Source:NCBI gene;Acc:105092787]
LRTM2	ENSCDRG00005022327	80.6621	-1.62673	0.293375	-5.54488	2.94154e-08	1.79183e-05	144.063	82.9736	152.901	112.054	113.368	20.8071	69.9202	35.5275	42.2463	32.7604	leucine rich repeats and transmembrane domains 2 [Source:HGNC Symbol;Acc:HGNC:32443]
TENT5A	ENSCDRG00005006725	170.408	1.34851	0.243498	5.53809	3.05782e-08	1.79614e-05	72.0314	67.1691	113.014	97.2957	124.978	248.694	194.466	270.601	174.714	341.117	terminal nucleotidyltransferase 5A [Source:HGNC Symbol;Acc:HGNC:18345]
CRYAB	ENSCDRG00005022310	488.516	0.976141	0.177895	5.48716	4.08444e-08	2.31644e-05	221.635	423.758	313.558	288.061	380.398	820.394	594.322	581.467	635.843	625.723	crystallin alpha B [Source:HGNC Symbol;Acc:HGNC:2389]
PTPRN	ENSCDRG00005000951	4068.13	1.35761	0.247968	5.47494	4.37661e-08	2.3994e-05	2692.87	1799.74	2706.79	1808.17	2416.93	4361.56	9480.75	6580.88	3330.3	5503.33	protein tyrosine phosphatase receptor type N [Source:NCBI gene;Acc:105096111]
PARP8	ENSCDRG00005011803	147.551	0.909096	0.167753	5.41924	5.98524e-08	3.17546e-05	132.981	92.8514	101.934	106.041	92.197	227.887	159.506	194.217	181.158	186.734	poly(ADP-ribose) polymerase family member 8 [Source:NCBI gene;Acc:105084243]
C1QL4	ENSCDRG00005006050	13.9131	-4.47637	0.832899	-5.37444	7.68192e-08	3.94827e-05	33.2453	13.8289	56.5069	15.8515	14.3418	0	0	1.77638	3.5802	0	complement C1q like 4 [Source:HGNC Symbol;Acc:HGNC:31416]
ZNF593	ENSCDRG00005005654	36.9099	1.63197	0.304052	5.3674	7.98782e-08	3.98108e-05	27.7044	13.8289	17.7277	20.2244	14.3418	62.4213	72.1052	46.1858	42.9624	51.5976	zinc finger protein 593 [Source:HGNC Symbol;Acc:HGNC:30943]
GLA	ENSCDRG00005013406	70.1136	1.55336	0.29166	5.32592	1.00446e-07	4.72009e-05	38.7861	27.6579	25.4835	38.809	49.1717	96.109	63.3652	127.899	90.937	142.917	galactosidase alpha [Source:NCBI gene;Acc:105085485]
ENSCDRG00005007999	ENSCDRG00005007999	91.3579	1.30446	0.244767	5.32941	9.85336e-08	4.72009e-05	72.0314	40.499	73.1266	44.8216	43.0253	98.0906	122.36	153.953	117.43	148.241	nan
RTL9	ENSCDRG00005015853	69.9825	-1.82569	0.344512	-5.29935	1.16214e-07	5.30937e-05	77.5723	83.9614	122.986	132.825	129.759	11.8898	19.6651	46.7779	46.5426	27.8463	retrotransposon Gag like 9 [Source:HGNC Symbol;Acc:HGNC:29245]
ENSCDRG00005021452	ENSCDRG00005021452	41.498	-3.35815	0.637125	-5.27079	1.35836e-07	6.03811e-05	0	111.619	55.399	72.1519	137.954	13.8714	4.37001	3.55275	13.6048	2.45703	nan
RET	ENSCDRG00005007057	177.285	-1.31768	0.252204	-5.22467	1.74465e-07	7.35749e-05	260.421	150.143	260.375	377.704	216.492	67.3754	109.25	117.833	111.702	101.557	ret proto-oncogene [Source:HGNC Symbol;Acc:HGNC:9967]
AFMID	ENSCDRG00005021067	53.0876	1.70957	0.327091	5.22659	1.72669e-07	7.35749e-05	22.1635	28.6457	23.2676	15.8515	32.0982	112.953	113.62	60.3968	60.8634	61.0162	arylformamidase [Source:HGNC Symbol;Acc:HGNC:20910]
RNF112	ENSCDRG00005017243	158.148	-1.5069	0.289605	-5.20329	1.9579e-07	8.05041e-05	310.289	162.984	257.051	230.667	204.882	51.5223	150.765	95.3322	59.4313	58.5591	ring finger protein 112 [Source:HGNC Symbol;Acc:HGNC:12968]
RAP1GAP2	ENSCDRG00005006722	865.096	-1.07284	0.206524	-5.19474	2.05011e-07	8.22394e-05	1279.94	837.638	1095.79	1439.21	1212.9	352.73	616.172	731.275	480.463	604.838	RAP1 GTPase activating protein 2 [Source:NCBI gene;Acc:105094397]
IGFBP5	ENSCDRG00005016426	106.536	-1.25642	0.244393	-5.141	2.73278e-07	0.000105533	155.145	219.287	115.23	121.346	141.369	65.3937	54.6252	61.5811	83.0606	48.3215	insulin like growth factor binding protein 5 [Source:NCBI gene;Acc:105096064]
ASS1	ENSCDRG00005007448	274.207	-1.47427	0.286868	-5.1392	2.75911e-07	0.000105533	382.321	266.701	313.558	585.414	468.497	62.4213	152.95	175.861	146.788	187.553	argininosuccinate synthase 1 [Source:HGNC Symbol;Acc:HGNC:758]
P4HB	ENSCDRG00005009507	541.709	0.803057	0.157635	5.09439	3.49858e-07	0.000130775	271.503	430.673	372.281	417.06	459.619	681.68	664.242	767.395	560.659	791.982	prolyl 4-hydroxylase subunit beta [Source:HGNC Symbol;Acc:HGNC:8548]
SYT9	ENSCDRG00005013569	173.928	-1.26199	0.248311	-5.08229	3.72906e-07	0.000136293	205.013	161.996	207.192	288.607	364.69	77.2835	85.2153	116.057	103.826	129.403	synaptotagmin 9 [Source:NCBI gene;Acc:105093968]
GLCE	ENSCDRG00005016979	142.231	1.20586	0.239841	5.02774	4.9629e-07	0.000177445	132.981	88.9003	80.8825	69.4188	76.4894	216.988	113.62	231.521	171.133	240.379	glucuronic acid epimerase [Source:HGNC Symbol;Acc:HGNC:17855]
PCSK2	ENSCDRG00005004757	159.598	-1.52398	0.30617	-4.97757	6.43859e-07	0.00022531	116.358	222.251	213.84	402.848	224.688	46.5683	87.4003	103.03	68.0238	110.976	proprotein convertase subtilisin/kexin type 2 [Source:NCBI gene;Acc:105094118]
ADRA1A	ENSCDRG00005019146	126.864	0.967101	0.194642	4.96862	6.74314e-07	0.000231051	105.277	76.0591	95.2862	75.9781	86.0506	158.53	155.136	204.283	128.171	183.868	adrenoceptor alpha 1A [Source:NCBI gene;Acc:105102306]
COL1A1	ENSCDRG00005012316	158.023	-1.03938	0.212137	-4.89956	9.60523e-07	0.000322403	232.717	228.177	142.929	224.655	229.468	113.944	139.84	75.1999	102.394	90.91	collagen type I alpha 1 chain [Source:HGNC Symbol;Acc:HGNC:2197]
PRKCG	ENSCDRG00005002473	65.0874	-1.35321	0.277144	-4.88272	1.04634e-06	0.000344184	110.818	69.1447	86.4224	109.321	86.7335	28.7336	67.7352	31.3827	28.6416	31.9414	protein kinase C gamma [Source:NCBI gene;Acc:105103265]
ENSCDRG00005020479	ENSCDRG00005020479	48.8182	2.30204	0.472713	4.86984	1.11686e-06	0.000360176	11.0818	17.7801	31.0234	2.18642	19.1223	96.109	102.695	76.9763	47.2586	83.9484	nan
SCG2	ENSCDRG00005002315	293.89	1.50982	0.311897	4.84076	1.29341e-06	0.000398954	60.9497	140.265	122.986	206.617	217.858	380.473	393.301	658.444	227.701	530.308	secretogranin II [Source:HGNC Symbol;Acc:HGNC:10575]
CDH13	ENSCDRG00005001202	104.747	-1.22824	0.25386	-4.83825	1.30987e-06	0.000398954	149.604	90.8759	149.577	196.231	150.247	42.605	52.4402	64.5417	80.9125	70.4348	cadherin 13 [Source:HGNC Symbol;Acc:HGNC:1753]
C1QA	ENSCDRG00005014427	376.03	1.66142	0.342975	4.84415	1.27156e-06	0.000398954	88.6541	242.006	151.793	238.32	170.735	1159.25	456.666	373.631	580.708	298.529	complement C1q A chain [Source:HGNC Symbol;Acc:HGNC:1241]
SPP1	ENSCDRG00005007782	547.183	1.23698	0.256444	4.82361	1.40983e-06	0.000421592	166.226	365.479	371.173	266.197	446.643	717.349	454.481	793.448	801.964	1088.87	secreted phosphoprotein 1 [Source:NCBI gene;Acc:105091573]
NPB	ENSCDRG00005009222	43.8583	-1.97743	0.410978	-4.81152	1.49784e-06	0.000439909	138.522	42.4746	52.075	76.5247	43.0253	12.8806	24.0351	24.2771	7.1604	17.6087	neuropeptide B [Source:HGNC Symbol;Acc:HGNC:30099]
SLC7A11	ENSCDRG00005001594	108.689	1.38004	0.289311	4.7701	1.84138e-06	0.000522157	38.7861	41.4868	87.5304	65.046	63.5135	175.374	113.62	209.02	95.9493	196.562	solute carrier family 7 member 11 [Source:HGNC Symbol;Acc:HGNC:11059]
ENSCDRG00005012023	ENSCDRG00005012023	74.4646	-1.70368	0.356943	-4.77298	1.81521e-06	0.000522157	160.685	75.0714	122.986	126.266	82.6359	11.8898	65.5502	36.1197	37.2341	26.2083	proline rich transmembrane protein 2 [Source:NCBI gene;Acc:105102749]
KCNQ2	ENSCDRG00005009242	188.233	-1.19583	0.251217	-4.76015	1.93452e-06	0.000539273	382.321	219.287	257.051	231.761	219.907	72.3294	192.281	108.359	102.394	96.6431	potassium voltage-gated channel subfamily Q member 2 [Source:HGNC Symbol;Acc:HGNC:6296]
SEPTIN3	ENSCDRG00005003987	177.903	-0.929177	0.195491	-4.75305	2.00373e-06	0.000549257	265.962	198.544	233.784	255.265	217.858	75.3019	128.915	124.938	131.035	147.422	septin 3 [Source:HGNC Symbol;Acc:HGNC:10750]
CAMK2A	ENSCDRG00005002212	305.14	-0.874785	0.184744	-4.73512	2.18929e-06	0.000590282	315.83	414.868	404.412	420.886	407.033	136.732	286.236	229.153	218.392	217.856	calcium/calmodulin dependent protein kinase II alpha [Source:HGNC Symbol;Acc:HGNC:1460]
SYN3	ENSCDRG00005015679	90.6137	1.1456	0.242379	4.72649	2.2843e-06	0.000605966	38.7861	57.2913	62.0468	56.8469	59.4159	176.365	135.47	119.017	80.9125	119.985	synapsin III [Source:HGNC Symbol;Acc:HGNC:11496]
ENSCDRG00005020708	ENSCDRG00005020708	61.5324	-1.97815	0.420426	-4.70511	2.53731e-06	0.000662399	121.899	46.4257	100.826	111.507	105.856	7.92651	56.8102	30.1984	15.0368	18.8372	nan
ENSCDRG00005006303	ENSCDRG00005006303	21.0248	-2.15712	0.464428	-4.64467	3.40621e-06	0.000875341	44.327	54.328	32.1314	18.038	25.2688	12.8806	2.18501	5.32913	7.1604	8.59959	nan
FKBP11	ENSCDRG00005007776	70.8582	1.56131	0.336867	4.63481	3.57268e-06	0.000903997	38.7861	31.609	15.5117	26.7836	66.2453	78.2743	124.545	117.241	97.3814	112.204	FKBP prolyl isomerase 11 [Source:NCBI gene;Acc:105103787]
TMED3	ENSCDRG00005018013	279.781	1.04182	0.225513	4.6198	3.84119e-06	0.000957212	260.421	124.46	181.709	162.342	199.419	316.07	493.812	408.567	248.466	402.543	transmembrane p24 trafficking protein 3 [Source:NCBI gene;Acc:105092236]
SLC38A2	ENSCDRG00005013409	800.658	1.08383	0.235336	4.60545	4.11571e-06	0.00101031	398.943	429.685	376.713	717.146	635.135	1088.9	683.907	1235.17	968.802	1472.17	solute carrier family 38 member 2 [Source:NCBI gene;Acc:105097081]
PRKCSH	ENSCDRG00005012807	324.098	0.592576	0.128766	4.60196	4.18541e-06	0.00101231	221.635	273.615	244.863	291.34	248.59	369.574	404.226	419.817	353.724	413.6	protein kinase C substrate 80K-H [Source:HGNC Symbol;Acc:HGNC:9411]
SCG3	ENSCDRG00005017511	781.061	1.34936	0.296193	4.55568	5.22152e-06	0.00124461	227.176	335.846	392.225	664.672	567.524	766.89	786.603	1382.02	899.346	1788.31	secretogranin III [Source:NCBI gene;Acc:105086627]
KCNAB1	ENSCDRG00005000711	70.3124	-1.23185	0.271724	-4.53346	5.80256e-06	0.00136335	94.1949	83.9614	104.15	136.651	73.7576	26.752	43.7001	56.2519	47.2586	36.4459	potassium voltage-gated channel subfamily A member regulatory beta subunit 1 [Source:NCBI gene;Acc:105094421]
LRRC4B	ENSCDRG00005013800	349.005	-0.723442	0.160568	-4.5055	6.62161e-06	0.00153388	487.597	383.259	421.032	460.788	419.326	242.749	329.936	308.497	214.096	222.77	leucine rich repeat containing 4B [Source:HGNC Symbol;Acc:HGNC:25042]
PDIA4	ENSCDRG00005012733	479.611	0.739018	0.165323	4.47016	7.81622e-06	0.00178546	326.912	360.54	321.314	373.331	412.496	561.792	471.962	676.207	518.413	773.145	protein disulfide isomerase family A member 4 [Source:HGNC Symbol;Acc:HGNC:30167]
MAMLD1	ENSCDRG00005016673	59.1539	-1.10385	0.248936	-4.43428	9.23813e-06	0.00208136	77.5723	76.0591	74.2346	97.8423	75.8064	21.7979	48.0702	35.5275	43.6784	40.9505	mastermind like domain containing 1 [Source:HGNC Symbol;Acc:HGNC:2568]
PYGM	ENSCDRG00005016305	338.713	-0.700824	0.159385	-4.39706	1.09727e-05	0.00243875	332.453	407.954	516.318	450.403	385.179	291.299	205.391	278.299	286.416	233.418	glycogen phosphorylase, muscle associated [Source:NCBI gene;Acc:105101558]
ENSCDRG00005011881	ENSCDRG00005011881	30.463	-1.85108	0.426391	-4.34128	1.41655e-05	0.0031064	88.6541	40.499	56.5069	25.1438	34.147	10.899	4.37001	19.5401	9.30851	15.5612	nan
DPP10	ENSCDRG00005014552	107.902	-1.27113	0.294943	-4.30975	1.63439e-05	0.00353694	138.522	125.448	99.7181	254.171	145.466	36.6601	56.8102	73.4236	67.3077	81.4914	dipeptidyl peptidase like 10 [Source:NCBI gene;Acc:105089079]
ENSCDRG00005014272	ENSCDRG00005014272	102.934	-0.746854	0.173469	-4.3054	1.66683e-05	0.0035603	99.7358	147.179	142.929	119.707	129.076	80.2559	80.8453	69.8708	82.3446	77.3964	nan
LINC02210-CRHR1	ENSCDRG00005021783	28.3632	-1.52441	0.354612	-4.2988	1.71725e-05	0.00362098	49.8679	40.499	36.5633	43.1818	36.8788	14.8622	26.2201	12.4346	15.7529	7.37108	LINC02210-CRHR1 readthrough [Source:HGNC Symbol;Acc:HGNC:51483]
C1QC	ENSCDRG00005014455	662.527	1.48429	0.348667	4.25705	2.07145e-05	0.00431255	326.912	408.941	376.713	350.92	278.64	2026.21	1127.46	467.779	862.828	398.857	complement C1q C chain [Source:NCBI gene;Acc:105088874]
INSYN2A	ENSCDRG00005004466	24.2552	-1.75866	0.414213	-4.24578	2.17837e-05	0.00447847	38.7861	26.6701	54.291	43.7284	27.3176	6.9357	2.18501	14.8031	14.3208	13.5136	inhibitory synaptic factor 2A [Source:HGNC Symbol;Acc:HGNC:33859]
ENSCDRG00005012900	ENSCDRG00005012900	84.0557	1.27227	0.299972	4.24129	2.22235e-05	0.00451247	66.4905	64.2058	47.6431	28.4235	45.0741	149.613	155.136	78.1606	80.9125	124.899	salt inducible kinase 1 [Source:NCBI gene;Acc:105105909]
PDZD4	ENSCDRG00005008529	143.81	-0.752028	0.178205	-4.22001	2.44289e-05	0.00489979	149.604	186.691	180.601	198.418	178.248	98.0906	128.915	133.228	90.937	93.367	PDZ domain containing 4 [Source:NCBI gene;Acc:105098709]
C1QB	ENSCDRG00005014476	743.883	1.36344	0.3249	4.19649	2.71086e-05	0.00531793	360.157	580.815	388.901	400.662	347.617	2161.96	1011.66	650.154	1064.75	472.159	complement C1q B chain [Source:NCBI gene;Acc:105088875]
ARC	ENSCDRG00005013348	18.1763	-1.86206	0.444471	-4.1894	2.79698e-05	0.00531793	44.327	17.7801	38.7793	26.237	17.7565	10.899	4.37001	7.69763	8.59248	5.32356	activity regulated cytoskeleton associated protein [Source:HGNC Symbol;Acc:HGNC:648]
NWD1	ENSCDRG00005021355	780.182	0.5886	0.140417	4.19179	2.76762e-05	0.00531793	559.629	737.873	630.44	602.905	581.183	1086.92	736.347	894.702	1041.84	929.985	NACHT and WD repeat domain containing 1 [Source:NCBI gene;Acc:105101831]
ENSCDRG00005018424	ENSCDRG00005018424	18.25	-2.14665	0.512457	-4.18894	2.80255e-05	0.00531793	66.4905	19.7556	22.1596	22.4108	19.8053	3.96326	10.925	8.28976	2.14812	6.55207	nan
ENSCDRG00005018935	ENSCDRG00005018935	450.557	0.658967	0.157343	4.1881	2.81304e-05	0.00531793	415.566	316.09	292.507	324.683	407.716	530.086	633.652	577.322	428.908	579.039	malectin [Source:NCBI gene;Acc:105101987]
PPIB	ENSCDRG00005000872	422.506	0.820604	0.196617	4.17361	2.99816e-05	0.00549984	177.308	364.491	298.046	332.882	335.324	508.288	502.552	608.113	405.994	692.063	peptidylprolyl isomerase B [Source:NCBI gene;Acc:105100522]
KLHL1	ENSCDRG00005003387	51.7229	-1.5242	0.365275	-4.17274	3.00958e-05	0.00549984	138.522	43.4624	85.3144	38.809	80.587	16.8438	39.3301	23.0929	27.9255	23.3418	kelch like family member 1 [Source:NCBI gene;Acc:105088002]
OPRL1	ENSCDRG00005012998	48.6379	-0.956198	0.229153	-4.17276	3.00937e-05	0.00549984	55.4088	61.2424	66.4788	75.4315	59.4159	33.6877	34.9601	33.7512	36.518	29.4843	opioid related nociceptin receptor 1 [Source:NCBI gene;Acc:105103401]
ADCYAP1R1	ENSCDRG00005002835	1502.57	-0.582979	0.140179	-4.15881	3.19909e-05	0.00578192	1629.02	1525.13	1923.45	1980.9	1945.02	914.521	1262.93	1206.16	1286.01	1352.59	ADCYAP receptor type I [Source:HGNC Symbol;Acc:HGNC:242]
ADRA1B	ENSCDRG00005010528	65.6448	1.41412	0.340687	4.15078	3.31343e-05	0.00580512	27.7044	34.5723	26.5915	48.1012	36.8788	76.2927	150.765	108.359	41.5303	105.652	adrenoceptor alpha 1B [Source:HGNC Symbol;Acc:HGNC:278]
ASRGL1	ENSCDRG00005006211	289.384	0.854759	0.205942	4.15048	3.31782e-05	0.00580512	199.472	182.74	177.277	226.294	243.81	545.939	253.461	366.526	358.02	340.298	asparaginase and isoaspartyl peptidase 1 [Source:NCBI gene;Acc:105091484]
ENSCDRG00005013607	ENSCDRG00005013607	941.665	0.52854	0.127256	4.15336	3.27628e-05	0.00580512	869.918	681.569	825.444	735.73	756.699	1365.34	1075.02	1033.85	1035.39	1037.68	nan
ENSCDRG00005009737	ENSCDRG00005009737	216.069	0.65012	0.156796	4.14629	3.3791e-05	0.00585011	149.604	167.923	146.253	201.697	169.369	302.198	227.241	242.179	289.28	264.949	nan
MDGA1	ENSCDRG00005013307	73.0848	-1.24683	0.302505	-4.12167	3.76133e-05	0.00644402	116.358	67.1691	134.065	125.719	70.3429	38.6417	54.6252	60.9889	29.3576	33.5794	MAM domain containing glycosylphosphatidylinositol anchor 1 [Source:HGNC Symbol;Acc:HGNC:19267]
CYP4V2	ENSCDRG00005011878	232.742	0.742535	0.181189	4.09813	4.16495e-05	0.00701262	121.899	151.131	167.305	225.201	188.492	348.767	292.791	239.219	298.589	294.024	cytochrome P450 family 4 subfamily V member 2 [Source:HGNC Symbol;Acc:HGNC:23198]
ERP29	ENSCDRG00005020068	216.112	0.911582	0.222479	4.09738	4.1785e-05	0.00701262	94.1949	126.436	150.685	174.914	191.906	203.117	244.721	349.946	265.651	359.545	endoplasmic reticulum protein 29 [Source:NCBI gene;Acc:105102473]
ATP6V0B	ENSCDRG00005011740	389.807	0.850771	0.208171	4.08689	4.37198e-05	0.00726323	188.39	213.361	248.187	404.488	318.933	467.664	522.217	549.492	406.71	578.63	ATPase H+ transporting V0 subunit b [Source:NCBI gene;Acc:105090899]
MYO16	ENSCDRG00005004209	162.21	-0.65289	0.159862	-4.08408	4.42515e-05	0.00727805	265.962	181.752	175.061	197.324	187.126	113.944	109.25	123.162	137.48	131.041	myosin XVI [Source:HGNC Symbol;Acc:HGNC:29822]
COL3A1	ENSCDRG00005010161	151.74	-0.860232	0.211418	-4.06886	4.72436e-05	0.00764559	205.013	215.336	154.009	179.833	224.688	69.357	117.99	103.03	142.492	105.652	collagen type III alpha 1 chain [Source:HGNC Symbol;Acc:HGNC:2201]
ENSCDRG00005009795	ENSCDRG00005009795	216.647	0.642095	0.15784	4.06801	4.7416e-05	0.00764559	177.308	161.996	140.713	191.858	175.516	298.235	235.981	230.337	301.453	253.074	nan
KDELR2	ENSCDRG00005015850	81.527	0.919212	0.226713	4.05451	5.02389e-05	0.00802213	33.2453	53.3402	54.291	72.6985	56.0012	111.962	139.84	94.7401	87.3568	111.795	KDEL endoplasmic reticulum protein retention receptor 2 [Source:HGNC Symbol;Acc:HGNC:6305]
PAMR1	ENSCDRG00005014873	126.486	-0.749305	0.185664	-4.03581	5.44139e-05	0.0085233	160.685	161.008	157.333	189.125	123.612	80.2559	109.25	96.5165	83.0606	104.014	peptidase domain containing associated with muscle regeneration 1 [Source:HGNC Symbol;Acc:HGNC:24554]
SCPEP1	ENSCDRG00005022141	136.854	0.974114	0.241346	4.03617	5.43309e-05	0.0085233	66.4905	108.656	77.5585	94.5627	105.856	290.309	166.061	152.768	159.677	146.603	serine carboxypeptidase 1 [Source:NCBI gene;Acc:105097792]
ST6GALNAC5	ENSCDRG00005012633	22.6157	-1.57788	0.39204	-4.0248	5.70232e-05	0.00884774	44.327	24.6945	28.8075	43.7284	30.7323	6.9357	6.55502	9.47401	18.617	12.2851	ST6 N-acetylgalactosaminide alpha-2,6-sialyltransferase 5 [Source:HGNC Symbol;Acc:HGNC:19342]
ENSCDRG00005000129	ENSCDRG00005000129	20.9726	1.93184	0.480274	4.02237	5.76153e-05	0.00885606	5.54088	10.8656	2.21596	7.65247	14.3418	17.8347	56.8102	30.1984	31.5057	32.7604	nan
CPNE5	ENSCDRG00005012211	69.9822	-1.23782	0.308638	-4.01058	6.05692e-05	0.0092239	160.685	63.218	94.1782	120.253	58.05	25.7612	50.2552	43.8173	45.1105	38.4934	copine 5 [Source:NCBI gene;Acc:105101328]
ACVR1B	ENSCDRG00005012094	145.074	-0.721359	0.18083	-3.98916	6.63078e-05	0.0100052	254.88	142.24	182.817	178.193	158.442	102.054	102.695	124.346	103.11	101.967	activin A receptor type 1B [Source:HGNC Symbol;Acc:HGNC:172]
CCKAR	ENSCDRG00005013202	69.2104	1.16681	0.293241	3.979	6.92044e-05	0.0103473	49.8679	27.6579	54.291	40.4488	45.0741	60.4397	85.2153	83.4897	100.246	145.374	cholecystokinin A receptor [Source:HGNC Symbol;Acc:HGNC:1570]
ADCY8	ENSCDRG00005005520	208.692	0.705896	0.178439	3.95596	7.62291e-05	0.011295	132.981	129.399	142.929	200.057	178.248	310.125	238.166	229.745	277.107	248.16	adenylate cyclase 8 [Source:HGNC Symbol;Acc:HGNC:239]
PGM5	ENSCDRG00005002644	127.532	-1.42088	0.359827	-3.9488	7.85452e-05	0.0115342	83.1132	102.729	181.709	345.454	213.078	45.5774	50.2552	104.214	87.3568	61.8352	phosphoglucomutase 5 [Source:NCBI gene;Acc:105105895]
ENSCDRG00005009752	ENSCDRG00005009752	490.441	0.595238	0.151088	3.93967	8.15921e-05	0.0118756	382.321	369.43	421.032	351.467	427.521	777.789	559.362	561.335	506.24	547.917	nan
NUCB2	ENSCDRG00005015072	110.987	0.917617	0.23311	3.93642	8.27069e-05	0.0119323	33.2453	71.1202	75.3426	94.5627	96.2947	130.787	124.545	157.505	133.183	193.286	nucleobindin 2 [Source:NCBI gene;Acc:105086671]
MARF1	ENSCDRG00005014293	607.954	-0.60957	0.155436	-3.92168	8.79326e-05	0.0125759	659.365	627.241	730.158	906.818	747.137	397.316	439.186	537.058	455.401	579.858	meiosis regulator and mRNA stability factor 1 [Source:NCBI gene;Acc:105091156]
NRXN2	ENSCDRG00005016748	1011.61	-0.485162	0.123802	-3.91886	8.89679e-05	0.0126143	1202.37	1274.24	1254.23	1142.95	1021.68	854.082	985.438	889.372	738.237	753.488	neurexin 2 [Source:HGNC Symbol;Acc:HGNC:8009]
LMO2	ENSCDRG00005018050	100.152	1.02496	0.261768	3.91553	9.02059e-05	0.0126805	27.7044	80.9981	60.9389	72.1519	75.8064	210.053	111.435	105.99	130.319	126.127	LIM domain only 2 [Source:NCBI gene;Acc:105106801]
PTPRT	ENSCDRG00005010508	524.384	-0.665499	0.170387	-3.90581	9.39098e-05	0.0130893	648.283	536.365	655.924	654.833	719.137	315.079	465.407	499.162	311.477	438.17	protein tyrosine phosphatase receptor type T [Source:HGNC Symbol;Acc:HGNC:9682]
LAMC2	ENSCDRG00005014721	21.7362	1.56643	0.405353	3.86435	0.000111388	0.0153949	11.0818	12.8412	6.64788	13.1185	10.2441	49.5407	37.1451	22.5008	21.4812	32.7604	laminin subunit gamma 2 [Source:HGNC Symbol;Acc:HGNC:6493]
FLYWCH2	ENSCDRG00005017836	37.7095	-1.07659	0.279393	-3.85332	0.000116527	0.015971	44.327	60.2546	39.8873	64.4994	44.3912	23.7795	28.4051	27.2378	19.3331	24.9798	FLYWCH family member 2 [Source:NCBI gene;Acc:105099692]
ENSCDRG00005003757	ENSCDRG00005003757	289.038	0.7345	0.191034	3.84487	0.000120617	0.0163949	232.717	159.033	207.192	257.998	232.2	315.079	321.196	422.778	289.28	452.912	nucleoside diphosphate kinase B [Source:NCBI gene;Acc:105097739]
ENSCDRG00005013244	ENSCDRG00005013244	78.8568	0.967689	0.25189	3.84172	0.000122175	0.0164706	44.327	44.4502	46.5351	63.9528	65.5623	115.925	61.1802	121.386	96.6653	128.584	nan
RAP1GAP	ENSCDRG00005012075	353.146	-0.678984	0.177022	-3.83558	0.000125266	0.01675	520.843	325.968	459.811	449.309	424.789	195.19	303.716	313.234	244.17	294.434	RAP1 GTPase activating protein [Source:HGNC Symbol;Acc:HGNC:9858]
UNC80	ENSCDRG00005012995	1438.42	-0.61743	0.161597	-3.82081	0.000133013	0.0176424	1496.04	1385.86	1762.79	2074.91	1982.58	920.466	1083.76	1409.26	1040.41	1228.1	unc-80 homolog, NALCN channel complex subunit [Source:HGNC Symbol;Acc:HGNC:26582]
ELN	ENSCDRG00005019059	86.2647	-1.15387	0.302665	-3.81236	0.000137646	0.0181108	166.226	144.216	107.474	66.1392	114.051	52.5131	58.9952	42.633	78.0483	32.3509	elastin [Source:HGNC Symbol;Acc:HGNC:3327]
SLC3A2	ENSCDRG00005004655	353.616	0.535762	0.140727	3.80711	0.000140599	0.0183527	227.176	316.09	263.699	309.925	308.006	476.582	443.556	355.867	402.414	432.846	solute carrier family 3 member 2 [Source:HGNC Symbol;Acc:HGNC:11026]
SAMD14	ENSCDRG00005011730	95.1533	-0.798403	0.21003	-3.80138	0.000143891	0.0186345	127.44	85.937	149.577	115.334	129.076	55.4856	65.5502	76.3842	70.1719	76.5773	sterile alpha motif domain containing 14 [Source:HGNC Symbol;Acc:HGNC:27312]
ABHD8	ENSCDRG00005015688	100.84	-0.906394	0.239745	-3.78065	0.000156418	0.0199427	182.849	115.57	129.634	140.477	100.392	62.4213	43.7001	98.885	67.3077	67.1587	abhydrolase domain containing 8 [Source:NCBI gene;Acc:105101841]
FBXL16	ENSCDRG00005012721	209.519	-0.652084	0.172405	-3.78228	0.000155398	0.0199427	326.912	222.251	278.103	220.282	238.346	146.64	205.391	173.493	136.764	147.012	F-box and leucine rich repeat protein 16 [Source:NCBI gene;Acc:105098443]
CTSS	ENSCDRG00005017707	123.488	1.01908	0.269836	3.77667	0.000158941	0.019955	72.0314	70.1325	69.8027	108.228	84.0017	254.639	131.1	110.135	203.355	131.451	cathepsin S [Source:NCBI gene;Acc:105103192]
FHOD3	ENSCDRG00005004437	402.704	-0.756597	0.200262	-3.77803	0.000158074	0.019955	509.761	362.516	514.102	665.765	475.327	214.016	356.156	333.367	252.046	343.984	formin homology 2 domain containing 3 [Source:HGNC Symbol;Acc:HGNC:26178]
SERPINB10	ENSCDRG00005013562	6.66665	-3.16568	0.839517	-3.77084	0.000162701	0.0202723	27.7044	5.92669	14.4037	5.46605	8.19529	0	0	1.18425	2.14812	1.63802	serpin family B member 10 [Source:NCBI gene;Acc:105100454]
TMEM35A	ENSCDRG00005012386	93.2158	0.977574	0.260487	3.75287	0.00017482	0.0213611	33.2453	74.0836	60.9389	74.3383	59.4159	88.1825	181.356	131.452	89.505	139.641	transmembrane protein 35A [Source:NCBI gene;Acc:105085494]
PLXNA4	ENSCDRG00005001474	718.603	-0.722361	0.192521	-3.75211	0.000175351	0.0213611	1091.55	622.302	982.778	931.962	854.359	363.629	579.027	641.864	496.931	621.628	plexin A4 [Source:HGNC Symbol;Acc:HGNC:9102]
AGT	ENSCDRG00005014204	1839.89	0.675417	0.180098	3.75028	0.000176635	0.0213611	1069.39	1670.34	1858.08	1127.1	1348.13	2334.36	1831.04	2054.68	2776.09	2329.67	angiotensinogen [Source:NCBI gene;Acc:105104282]
USP22	ENSCDRG00005020628	390.641	-0.439729	0.117172	-3.75286	0.000174832	0.0213611	387.861	446.477	464.243	454.775	480.79	301.207	369.266	353.499	312.909	335.384	ubiquitin specific peptidase 22 [Source:HGNC Symbol;Acc:HGNC:12621]
ERN1	ENSCDRG00005020928	192.771	0.684143	0.182711	3.74439	0.000180829	0.0217088	221.635	142.24	151.793	116.427	129.076	266.529	242.536	244.548	201.207	211.714	endoplasmic reticulum to nucleus signaling 1 [Source:HGNC Symbol;Acc:HGNC:3449]
ENSCDRG00005002069	ENSCDRG00005002069	10.3081	-3.68239	0.984777	-3.73931	0.000184524	0.0219918	60.9497	6.91447	17.7277	1.63982	9.56117	0.990814	0	0.592125	4.29624	0.409505	nan
BTBD17	ENSCDRG00005013309	21.7396	-1.44623	0.387633	-3.73091	0.000190786	0.0225745	11.0818	24.6945	40.9952	49.1945	30.0494	9.90814	13.11	14.211	11.4566	12.6946	BTB domain containing 17 [Source:HGNC Symbol;Acc:HGNC:33758]
ADAP2	ENSCDRG00005017539	84.5172	1.09434	0.294164	3.72018	0.000199084	0.023388	44.327	56.3035	65.3708	49.7411	51.9035	195.19	78.6603	70.4629	123.875	109.338	ArfGAP with dual PH domains 2 [Source:HGNC Symbol;Acc:HGNC:16487]
SSR3	ENSCDRG00005001758	480.62	0.684002	0.184719	3.70293	0.000213126	0.0248602	249.34	327.943	378.929	454.775	417.96	567.736	426.076	695.747	605.053	682.644	signal sequence receptor subunit 3 [Source:NCBI gene;Acc:105094412]
ENSCDRG00005017960	ENSCDRG00005017960	146.183	0.753469	0.203805	3.69701	0.000218155	0.0252676	99.7358	79.0225	128.526	113.147	118.149	166.457	240.351	170.532	143.208	202.705	nan
RYR2	ENSCDRG00005010146	542.243	-0.471559	0.12764	-3.69444	0.000220373	0.0252887	615.038	623.29	712.431	522.008	674.063	502.343	478.517	415.08	435.352	444.312	ryanodine receptor 2 [Source:HGNC Symbol;Acc:HGNC:10484]
LRP8	ENSCDRG00005008741	187.985	0.747034	0.202271	3.69324	0.000221413	0.0252887	110.818	191.63	135.173	114.787	142.052	302.198	242.536	195.994	196.911	247.75	LDL receptor related protein 8 [Source:NCBI gene;Acc:105090780]
SLC24A3	ENSCDRG00005020283	90.8047	-0.761434	0.206355	-3.68992	0.000224323	0.0254444	166.226	110.631	113.014	98.9355	94.2458	55.4856	61.1802	78.1606	65.8756	64.2922	solute carrier family 24 member 3 [Source:HGNC Symbol;Acc:HGNC:10977]
KRT78	ENSCDRG00005007377	8.09523	-4.66366	1.27547	-3.65642	0.000255762	0.0288118	60.9497	8.89003	7.75585	0.546605	0.682941	0	0	0.592125	0.71604	0.819009	keratin 78 [Source:NCBI gene;Acc:105094583]
FUCA1	ENSCDRG00005003479	190.495	0.701296	0.192097	3.65073	0.000261493	0.0292569	177.308	118.534	151.793	145.397	145.466	266.529	144.21	261.127	237.009	257.578	alpha-L-fucosidase 1 [Source:HGNC Symbol;Acc:HGNC:4006]
OR2D2	ENSCDRG00005013858	11.8532	-2.53356	0.695456	-3.64302	0.000269454	0.029944	49.8679	10.8656	25.4835	6.55926	11.61	1.98163	0	5.92125	2.14812	4.09505	olfactory receptor 2D2 [Source:NCBI gene;Acc:105093998]
CHD5	ENSCDRG00005015748	1108.57	-0.678932	0.186863	-3.63332	0.000279795	0.0304754	1501.58	1067.79	1657.54	1265.39	1327.64	696.542	1197.38	950.954	695.274	725.642	chromodomain helicase DNA binding protein 5 [Source:HGNC Symbol;Acc:HGNC:16816]
GABBR2	ENSCDRG00005000057	83.2227	-0.775049	0.213252	-3.63443	0.000278596	0.0304754	94.1949	83.9614	121.878	95.6559	128.393	50.5315	63.3652	71.6472	55.8511	66.7492	gamma-aminobutyric acid type B receptor subunit 2 [Source:HGNC Symbol;Acc:HGNC:4507]
RPN2	ENSCDRG00005018669	685.159	0.699596	0.192456	3.6351	0.000277871	0.0304754	415.566	406.966	527.398	661.392	589.378	652.946	751.642	1072.34	754.706	1019.26	ribophorin II [Source:NCBI gene;Acc:105084991]
GPR162	ENSCDRG00005018926	227.628	-0.72592	0.199927	-3.63092	0.000282414	0.0305583	360.157	243.982	247.079	337.255	232.883	131.778	225.056	195.994	143.208	158.888	G protein-coupled receptor 162 [Source:HGNC Symbol;Acc:HGNC:16693]
VSIG4	ENSCDRG00005013180	75.5187	1.5315	0.422848	3.62187	0.00029248	0.0314406	0	52.3524	23.2676	65.046	41.6594	193.209	107.065	63.9496	129.603	79.0344	V-set and immunoglobulin domain containing 4 [Source:NCBI gene;Acc:105090657]
PPP1R15B	ENSCDRG00005015580	244.28	0.570391	0.157641	3.61829	0.000296558	0.031672	149.604	189.654	210.516	219.735	195.321	283.373	371.451	291.918	244.17	287.063	protein phosphatase 1 regulatory subunit 15B [Source:HGNC Symbol;Acc:HGNC:14951]
ENSCDRG00005009663	ENSCDRG00005009663	99.2451	1.11095	0.307329	3.61484	0.000300535	0.0316852	99.7358	61.2424	39.8873	84.7238	38.2447	206.089	107.065	95.3322	133.183	126.946	complement factor I [Source:NCBI gene;Acc:105089900]
LCP1	ENSCDRG00005007408	123.507	1.3555	0.374826	3.61635	0.000298785	0.0316852	49.8679	100.754	39.8873	82.5374	69.66	367.592	104.88	109.543	196.911	113.433	lymphocyte cytosolic protein 1 [Source:NCBI gene;Acc:105089748]
LARS2	ENSCDRG00005004996	177.4	-0.554293	0.153558	-3.60966	0.000306598	0.0321186	177.308	214.349	251.511	214.269	197.37	149.613	115.805	154.545	143.208	156.021	leucyl-tRNA synthetase 2, mitochondrial [Source:NCBI gene;Acc:105091299]
CHRM2	ENSCDRG00005002309	12.2769	-1.911	0.529913	-3.60624	0.000310661	0.0322523	22.1635	13.8289	23.2676	16.9448	23.22	5.94488	0	8.28976	2.14812	6.96158	cholinergic receptor muscarinic 2 [Source:NCBI gene;Acc:105091619]
RANGAP1	ENSCDRG00005017066	567.299	-0.742533	0.205956	-3.6053	0.000311796	0.0322523	764.641	615.388	766.722	780.552	624.208	251.667	520.032	530.544	340.119	479.12	Ran GTPase activating protein 1 [Source:NCBI gene;Acc:105091906]
SV2C	ENSCDRG00005001113	41.5918	1.24129	0.344696	3.60111	0.000316855	0.0325708	27.7044	22.719	34.3474	14.7583	25.9518	81.2468	61.1802	65.7259	31.5057	50.7786	synaptic vesicle glycoprotein 2C [Source:HGNC Symbol;Acc:HGNC:30670]
BTBD11	ENSCDRG00005016449	208.295	-0.75171	0.208898	-3.59845	0.000320116	0.0327015	221.635	183.727	250.403	356.933	290.933	131.778	148.58	172.901	136.048	190.01	BTB domain containing 11 [Source:HGNC Symbol;Acc:HGNC:23844]
TNFRSF9	ENSCDRG00005010519	7.27048	-3.94637	1.09885	-3.59136	0.000328958	0.0330007	44.327	11.8534	8.86383	0.546605	3.4147	1.98163	0	0.592125	0.71604	0.409505	TNF receptor superfamily member 9 [Source:NCBI gene;Acc:105106985]
ENSCDRG00005018240	ENSCDRG00005018240	1061.64	-0.531589	0.148022	-3.59128	0.000329064	0.0330007	1401.84	968.026	1141.22	1586.25	1186.95	818.412	797.528	953.914	869.988	892.31	tubulin beta class I [Source:NCBI gene;Acc:105087494]
C1orf189	ENSCDRG00005018735	14.1505	-3.15925	0.879274	-3.59303	0.000326859	0.0330007	88.6541	15.8045	13.2958	3.27963	8.87823	0	0	4.737	3.5802	3.27604	chromosome 1 open reading frame 189 [Source:HGNC Symbol;Acc:HGNC:32305]
RAB6B	ENSCDRG00005011741	323.169	-0.61885	0.172426	-3.58908	0.000331852	0.0330786	349.075	331.894	406.628	449.856	417.96	203.117	233.796	342.841	243.453	253.074	RAB6B, member RAS oncogene family [Source:NCBI gene;Acc:105085290]
LAMB3	ENSCDRG00005007050	131.255	-0.984172	0.274571	-3.5844	0.000337848	0.0334734	232.717	169.898	175.061	188.579	107.905	41.6142	122.36	92.3716	98.0974	83.9484	laminin subunit beta 3 [Source:HGNC Symbol;Acc:HGNC:6490]
UNC13A	ENSCDRG00005013982	961.771	0.62836	0.175983	3.57056	0.000356212	0.0350816	775.723	647.984	829.876	704.027	817.48	891.733	1599.43	1262.41	907.222	1181.83	unc-13 homolog A [Source:HGNC Symbol;Acc:HGNC:23150]
CDYL2	ENSCDRG00005016623	143.071	-0.88526	0.248153	-3.56739	0.000360554	0.035121	232.717	113.595	221.596	162.342	205.565	62.4213	85.2153	117.833	118.863	110.566	chromodomain Y like 2 [Source:HGNC Symbol;Acc:HGNC:23030]
HEYL	ENSCDRG00005012353	76.0982	-1.15186	0.323152	-3.56445	0.000364625	0.035121	49.8679	67.1691	110.798	156.329	137.271	28.7336	39.3301	53.2913	63.7275	54.4641	hes related family bHLH transcription factor with YRPW motif like [Source:NCBI gene;Acc:105103360]
SYT4	ENSCDRG00005003658	862.871	0.972521	0.272822	3.56467	0.00036431	0.035121	426.648	400.051	620.468	887.687	570.256	989.823	880.558	1271.89	713.175	1868.16	synaptotagmin 4 [Source:NCBI gene;Acc:105085254]
SLC20A1	ENSCDRG00005011004	314.833	0.633402	0.177719	3.56407	0.000365155	0.035121	171.767	190.642	267.023	267.29	322.348	371.555	340.861	407.974	378.069	430.799	solute carrier family 20 member 1 [Source:HGNC Symbol;Acc:HGNC:10946]
ENSCDRG00005008328	ENSCDRG00005008328	7.17858	-3.91104	1.10091	-3.55255	0.000381514	0.0362439	38.7861	4.93891	19.9436	2.18642	2.04882	1.98163	0	1.18425	0.71604	0	olfactory receptor 1L8-like [Source:NCBI gene;Acc:105105945]
RASGRP3	ENSCDRG00005016347	127.855	1.06608	0.3002	3.55123	0.00038344	0.0362439	27.7044	103.717	67.5867	111.507	89.4653	282.382	126.73	129.083	156.097	184.277	RAS guanyl releasing protein 3 [Source:NCBI gene;Acc:105095517]
CUEDC1	ENSCDRG00005022147	239.462	-0.539465	0.151822	-3.55327	0.000380473	0.0362439	254.88	318.066	288.075	291.34	255.42	189.245	238.166	205.468	195.479	158.478	CUE domain containing 1 [Source:HGNC Symbol;Acc:HGNC:31350]
SAMHD1	ENSCDRG00005018142	139.11	1.10866	0.312588	3.54671	0.000390073	0.0366602	77.5723	100.754	67.5867	109.321	81.27	342.822	205.391	93.5558	168.269	144.555	SAM and HD domain containing deoxynucleoside triphosphate triphosphohydrolase 1 [Source:HGNC Symbol;Acc:HGNC:15925]
GBA	ENSCDRG00005006922	225.809	0.658624	0.185875	3.54336	0.000395057	0.0369176	160.685	148.167	172.845	184.206	208.98	242.749	220.686	328.038	242.021	349.717	glucosylceramidase beta [Source:HGNC Symbol;Acc:HGNC:4177]
MYRIP	ENSCDRG00005019822	362.962	0.505708	0.142844	3.54029	0.000399695	0.03714	282.585	257.811	334.61	314.298	302.543	481.536	474.147	442.318	368.76	371.011	myosin VIIA and Rab interacting protein [Source:HGNC Symbol;Acc:HGNC:19156]
THRA	ENSCDRG00005006139	564.313	-0.482156	0.136264	-3.53841	0.000402552	0.0371953	531.924	586.742	784.449	676.15	693.185	414.16	530.957	502.715	453.969	468.883	thyroid hormone receptor alpha [Source:HGNC Symbol;Acc:HGNC:11796]
ALDOC	ENSCDRG00005013935	1615.15	0.583847	0.165519	3.52737	0.000419703	0.0385635	1052.77	1129.03	1199.94	1554	1514.08	1552.61	1800.45	2136.98	1780.79	2430.82	aldolase, fructose-bisphosphate C [Source:NCBI gene;Acc:105088182]
CHAC1	ENSCDRG00005020257	32.2313	1.72792	0.490318	3.52408	0.000424956	0.0386146	11.0818	3.95112	25.4835	15.3049	17.0735	38.6417	72.1052	63.9496	15.7529	58.9687	ChaC glutathione specific gamma-glutamylcyclotransferase 1 [Source:NCBI gene;Acc:105096863]
ECHDC3	ENSCDRG00005012903	373.64	0.644743	0.182924	3.52466	0.000424032	0.0386146	271.503	301.273	344.582	276.036	262.932	422.087	450.111	320.932	477.598	609.343	enoyl-CoA hydratase domain containing 3 [Source:HGNC Symbol;Acc:HGNC:23489]
CITED2	ENSCDRG00005012611	36.6695	1.13642	0.323072	3.51756	0.000435539	0.0393589	27.7044	27.6579	24.3755	20.771	15.7076	71.3386	61.1802	39.6724	36.518	41.7695	Cbp/p300 interacting transactivator with Glu/Asp rich carboxy-terminal domain 2 [Source:HGNC Symbol;Acc:HGNC:1987]
SNX30	ENSCDRG00005005152	109.981	-0.772822	0.220173	-3.51007	0.000447984	0.0402622	83.1132	125.448	172.845	141.024	163.906	96.109	78.6603	84.6739	59.4313	94.5955	sorting nexin family member 30 [Source:NCBI gene;Acc:105096254]
B2M	ENSCDRG00005009849	3676.94	0.924711	0.263584	3.50823	0.000451104	0.0403223	1479.41	2619.6	2528.41	3082.31	2960.55	7725.38	4153.7	3323.01	5899.45	2997.57	beta-2-microglobulin [Source:NCBI gene;Acc:105106736]
DLG4	ENSCDRG00005018407	649.913	-0.582761	0.166326	-3.50372	0.000458812	0.0405704	919.786	627.241	819.905	808.975	728.015	412.179	598.692	621.732	413.871	548.736	discs large MAGUK scaffold protein 4 [Source:HGNC Symbol;Acc:HGNC:2903]
ENSCDRG00005005262	ENSCDRG00005005262	14.8395	-1.76688	0.504174	-3.5045	0.000457458	0.0405704	44.327	16.7923	21.0516	19.1312	17.0735	1.98163	4.37001	4.737	10.7406	8.19009	ephrin A3 [Source:HGNC Symbol;Acc:HGNC:3223]
ENSCDRG00005017088	ENSCDRG00005017088	8.1422	-4.32779	1.24006	-3.48999	0.000483047	0.0409519	55.4088	4.93891	15.5117	0.546605	2.04882	0	0	0	2.14812	0.819009	nan
TARS1	ENSCDRG00005002113	288.461	0.535652	0.153334	3.49337	0.000476962	0.0409519	277.044	203.483	197.22	291.887	217.175	355.702	314.641	359.42	335.107	332.927	threonyl-tRNA synthetase 1 [Source:HGNC Symbol;Acc:HGNC:11572]
RABAC1	ENSCDRG00005018418	222.535	0.658983	0.188589	3.49429	0.000475332	0.0409519	149.604	150.143	171.737	199.511	185.76	255.63	275.311	335.143	190.467	312.042	Rab acceptor 1 [Source:NCBI gene;Acc:105090228]
DBP	ENSCDRG00005002166	23.774	-1.16823	0.33383	-3.49946	0.000466195	0.0409519	44.327	30.6212	37.6713	26.7836	26.6347	17.8347	15.295	11.2504	15.0368	12.2851	D-box binding PAR bZIP transcription factor [Source:HGNC Symbol;Acc:HGNC:2697]
SLC4A8	ENSCDRG00005012997	195.986	-0.531353	0.152081	-3.49389	0.000476033	0.0409519	210.553	220.275	240.431	227.934	258.152	140.696	152.95	187.112	143.208	178.544	solute carrier family 4 member 8 [Source:HGNC Symbol;Acc:HGNC:11034]
ENSCDRG00005017812	ENSCDRG00005017812	19.7166	1.57462	0.451134	3.49036	0.000482369	0.0409519	11.0818	9.87781	6.64788	15.3049	6.14647	48.5499	32.7751	17.7638	23.6293	25.3893	nan
BHLHE22	ENSCDRG00005020705	105.205	-0.930912	0.26633	-3.49534	0.000473465	0.0409519	160.685	101.741	180.601	165.075	83.3188	50.5315	87.4003	88.2267	67.3077	67.1587	basic helix-loop-helix family member e22 [Source:HGNC Symbol;Acc:HGNC:11963]
ENSCDRG00005018476	ENSCDRG00005018476	301.918	-0.569954	0.163285	-3.49054	0.000482047	0.0409519	410.025	300.285	322.422	425.259	347.617	207.08	286.236	271.193	203.355	245.703	nan
FGL2	ENSCDRG00005017208	111.542	1.00987	0.289806	3.48465	0.000492777	0.0415626	49.8679	84.9492	49.8591	97.8423	80.587	241.759	102.695	111.32	170.417	126.127	fibrinogen like 2 [Source:HGNC Symbol;Acc:HGNC:3696]
ENSCDRG00005019300	ENSCDRG00005019300	20.1936	-1.45724	0.420562	-3.46498	0.000530261	0.044496	49.8679	24.6945	35.4553	22.9574	19.1223	16.8438	4.37001	11.8425	8.59248	8.19009	nan
ATF4	ENSCDRG00005014461	365.82	0.719378	0.207699	3.46357	0.000533063	0.044504	249.34	225.214	230.46	317.578	355.129	356.693	437.001	562.519	347.279	576.992	activating transcription factor 4 [Source:NCBI gene;Acc:105091928]
MFSD2A	ENSCDRG00005013329	129.206	0.69313	0.200972	3.44889	0.000562891	0.0467569	83.1132	99.7659	86.4224	114.24	102.441	174.383	183.541	110.135	155.381	182.639	major facilitator superfamily domain containing 2A [Source:HGNC Symbol;Acc:HGNC:25897]
ARHGEF28	ENSCDRG00005002784	144.033	-0.869976	0.25247	-3.44586	0.000569254	0.0470479	304.748	145.204	175.061	192.952	125.661	63.4121	98.3253	107.175	118.863	108.928	Rho guanine nucleotide exchange factor 28 [Source:HGNC Symbol;Acc:HGNC:30322]
ANXA5	ENSCDRG00005003256	173.582	0.78238	0.227366	3.44105	0.000579454	0.0476514	121.899	179.776	101.934	101.669	133.173	300.217	166.061	198.954	244.17	187.963	annexin A5 [Source:NCBI gene;Acc:105093656]
ENSCDRG00005012146	ENSCDRG00005012146	103.903	-0.950154	0.276298	-3.43887	0.000584148	0.0477984	210.553	92.8514	178.385	110.961	98.3435	46.5683	89.5853	81.7133	60.8634	69.2063	nan
IGSF6	ENSCDRG00005021105	41.7263	1.01913	0.296559	3.43653	0.000589215	0.0479743	22.1635	36.5479	21.0516	27.3303	28.0006	80.2559	52.4402	39.6724	59.4313	50.3691	immunoglobulin superfamily member 6 [Source:HGNC Symbol;Acc:HGNC:5953]
ENSCDRG00005000508	ENSCDRG00005000508	162.259	0.944762	0.275358	3.43103	0.000601288	0.0487161	72.0314	122.485	93.0703	135.011	123.612	372.546	144.21	164.019	221.972	173.63	nan
KLK7	ENSCDRG00005014676	9.23946	-3.0706	0.895619	-3.42847	0.000606995	0.0489375	49.8679	14.8167	8.86383	0.546605	9.56117	0.990814	2.18501	1.77638	2.14812	1.63802	kallikrein related peptidase 7 [Source:NCBI gene;Acc:105100155]
SFRP4	ENSCDRG00005013281	12.8534	-2.04376	0.59705	-3.4231	0.000619119	0.0496715	38.7861	27.6579	5.5399	21.3176	12.9759	6.9357	0	3.55275	6.44436	5.32356	secreted frizzled related protein 4 [Source:NCBI gene;Acc:105097359]
ANXA2	ENSCDRG00005010380	252.142	0.647411	0.189373	3.41871	0.000629196	0.0497855	160.685	213.361	167.305	225.748	211.029	329.941	196.651	354.683	302.885	359.135	annexin A2 [Source:HGNC Symbol;Acc:HGNC:537]
CTSA	ENSCDRG00005019078	449.541	0.488952	0.14303	3.41852	0.000629621	0.0497855	398.943	317.078	403.304	391.916	362.642	651.956	522.217	495.017	448.241	504.1	cathepsin A [Source:NCBI gene;Acc:105087842]
SLC14A1	ENSCDRG00005015615	415.643	0.85046	0.248722	3.41932	0.000627789	0.0497855	155.145	274.603	364.525	325.777	349.666	487.481	327.751	454.16	703.151	714.176	solute carrier family 14 member 1 (Kidd blood group) [Source:NCBI gene;Acc:105095211]
LGALS1	ENSCDRG00005009429	153.111	1.08554	0.317754	3.4163	0.000634789	0.049954	60.9497	69.1447	72.0186	175.46	105.173	248.694	122.36	273.562	151.084	252.664	galectin 1 [Source:HGNC Symbol;Acc:HGNC:6561]
WARS1	ENSCDRG00005002549	399.19	0.689581	0.202636	3.40305	0.000666381	0.0521903	243.799	276.579	268.131	385.357	346.251	461.719	384.561	627.653	376.637	621.218	tryptophanyl-tRNA synthetase 1 [Source:NCBI gene;Acc:105095336]
FADS6	ENSCDRG00005008674	21.3068	-1.6211	0.477453	-3.39531	0.000685507	0.0534338	38.7861	21.7312	38.7793	34.9827	30.7323	3.96326	0	14.211	14.3208	15.5612	fatty acid desaturase 6 [Source:NCBI gene;Acc:105104620]
HEXB	ENSCDRG00005002726	142.293	0.76131	0.2244	3.39265	0.000692204	0.0534492	94.1949	89.8881	69.8027	148.677	120.881	179.337	157.321	164.019	179.726	219.085	hexosaminidase subunit beta [Source:NCBI gene;Acc:105084795]
ENSCDRG00005007409	ENSCDRG00005007409	148.364	0.78942	0.232613	3.3937	0.000689549	0.0534492	72.0314	107.668	90.8543	149.77	115.417	207.08	111.435	198.362	220.54	210.485	nan
ENSCDRG00005007958	ENSCDRG00005007958	249.653	1.00165	0.297281	3.36939	0.000753346	0.0576292	66.4905	110.631	177.277	250.892	212.395	269.501	251.276	413.304	274.243	470.521	chromosome unknown open reading frame, human C15orf48 [Source:NCBI gene;Acc:105101685]
THEM6	ENSCDRG00005013436	89.3907	-1.16673	0.346239	-3.36973	0.000752415	0.0576292	205.013	69.1447	167.305	93.4695	87.4164	30.7152	80.8453	68.0944	35.802	56.1021	thioesterase superfamily member 6 [Source:HGNC Symbol;Acc:HGNC:29656]
ENSCDRG00005015835	ENSCDRG00005015835	13.0753	1.94722	0.579094	3.36252	0.000772335	0.0585852	11.0818	6.91447	0	5.46605	5.46353	15.853	39.3301	17.1716	14.3208	15.1517	nan
ENSCDRG00005012153	ENSCDRG00005012153	111.04	-0.969011	0.288199	-3.3623	0.000772967	0.0585852	149.604	78.0347	161.765	196.778	147.515	43.5958	93.9553	100.069	60.8634	78.2154	nan
TRPC5	ENSCDRG00005007632	35.4189	-1.22193	0.364301	-3.35419	0.000795976	0.0600524	83.1132	27.6579	49.8591	44.8216	43.7082	22.7887	32.7751	10.0661	19.3331	20.0657	transient receptor potential cation channel subfamily C member 5 [Source:NCBI gene;Acc:105103130]
EPHB6	ENSCDRG00005006214	105.908	-0.912864	0.272569	-3.34912	0.000810699	0.0608395	205.013	133.35	165.089	81.9908	109.271	72.3294	107.065	70.4629	60.8634	53.6451	EPH receptor B6 [Source:HGNC Symbol;Acc:HGNC:3396]
Metazoa_SRP	ENSCDRG00005006210	10733.2	0.642392	0.19187	3.34806	0.000813808	0.0608395	8167.25	7089.31	7176.38	12145.6	7330	17308.5	11311.8	13130.4	10002.4	13670.1	Metazoan signal recognition particle RNA [Source:RFAM;Acc:RF00017]
ENSCDRG00005019062	ENSCDRG00005019062	1549.46	-0.653678	0.195494	-3.34373	0.000826599	0.0615162	1800.79	1272.26	1902.4	2603.48	1892.43	936.319	1203.94	1534.2	1049	1299.77	nan
ATP10D	ENSCDRG00005003361	365.911	0.731641	0.21925	3.33701	0.000846847	0.0617252	321.371	272.628	227.136	278.222	280.689	737.166	441.371	347.578	402.414	350.536	ATPase phospholipid transporting 10D (putative) [Source:HGNC Symbol;Acc:HGNC:13549]
KIAA1549	ENSCDRG00005002734	230.866	-0.499659	0.149858	-3.33423	0.000855365	0.0617252	332.453	227.19	278.103	247.065	275.225	184.291	216.316	201.915	161.825	184.277	KIAA1549 [Source:HGNC Symbol;Acc:HGNC:22219]
ENSCDRG00005015876	ENSCDRG00005015876	11.3326	-3.59979	1.07889	-3.33656	0.00084822	0.0617252	83.1132	9.87781	7.75585	0.546605	4.78059	1.98163	0	4.14488	0.71604	0.409505	interferon lambda-3-like [Source:NCBI gene;Acc:105106776]
ENSCDRG00005016259	ENSCDRG00005016259	11.3326	-3.59979	1.07889	-3.33656	0.00084822	0.0617252	83.1132	9.87781	7.75585	0.546605	4.78059	1.98163	0	4.14488	0.71604	0.409505	interferon lambda-3-like [Source:NCBI gene;Acc:105106776]
BCAR1	ENSCDRG00005014264	178.791	-0.553245	0.165673	-3.33938	0.000839651	0.0617252	210.553	189.654	265.915	224.655	173.467	138.714	144.21	161.058	136.764	142.917	BCAR1 scaffold protein, Cas family member [Source:HGNC Symbol;Acc:HGNC:971]
FOSL2	ENSCDRG00005012100	448.832	0.902079	0.270559	3.33413	0.000855679	0.0617252	437.729	280.53	433.22	221.375	202.151	494.416	939.553	486.135	417.451	575.763	FOS like 2, AP-1 transcription factor subunit [Source:NCBI gene;Acc:105098561]
FGL1	ENSCDRG00005020193	110.71	1.3319	0.39901	3.33801	0.000843798	0.0617252	5.54088	81.9858	32.1314	81.9908	101.075	92.1457	144.21	201.323	135.331	231.37	fibrinogen like 1 [Source:NCBI gene;Acc:105102373]
REXO2	ENSCDRG00005015219	90.5782	0.889034	0.267065	3.32891	0.000871872	0.0626187	33.2453	63.218	47.6431	94.0161	70.3429	126.824	80.8453	106.583	130.319	152.745	RNA exonuclease 2 [Source:HGNC Symbol;Acc:HGNC:17851]
GAS6	ENSCDRG00005011499	369.683	-0.409415	0.123102	-3.32582	0.000881583	0.0628298	476.516	395.112	421.032	389.183	431.619	287.336	362.711	330.998	313.625	288.701	growth arrest specific 6 [Source:HGNC Symbol;Acc:HGNC:4168]
ENSCDRG00005004440	ENSCDRG00005004440	67.6247	-0.776909	0.233618	-3.32555	0.000882452	0.0628298	127.44	81.9858	77.5585	60.6732	90.1482	46.5683	39.3301	50.9228	47.9747	53.6451	olfactory receptor 2S2-like [Source:NCBI gene;Acc:105102283]
HCN4	ENSCDRG00005007849	41.0241	-0.945759	0.284559	-3.32359	0.000888656	0.0629988	72.0314	42.4746	53.183	43.1818	59.4159	19.8163	41.5151	29.6063	26.4935	22.5227	hyperpolarization activated cyclic nucleotide gated potassium channel 4 [Source:HGNC Symbol;Acc:HGNC:16882]
SIDT1	ENSCDRG00005013959	37.1317	-1.32218	0.398346	-3.31916	0.000902875	0.0635864	121.899	52.3524	32.1314	30.6099	34.83	25.7612	21.8501	16.5795	19.3331	15.9707	SID1 transmembrane family member 1 [Source:HGNC Symbol;Acc:HGNC:25967]
GARNL3	ENSCDRG00005015033	454.926	-0.526815	0.158746	-3.31861	0.000904676	0.0635864	415.566	580.815	498.591	650.46	534.743	389.39	273.126	400.277	395.97	410.324	GTPase activating Rap/RanGAP domain like 3 [Source:NCBI gene;Acc:105092613]
CALCR	ENSCDRG00005000927	787.169	0.724595	0.218586	3.31493	0.000916674	0.0641555	576.251	666.752	518.534	684.896	519.718	1564.5	777.863	732.459	1071.91	758.812	calcitonin receptor [Source:NCBI gene;Acc:105088743]
ENSCDRG00005001395	ENSCDRG00005001395	11.0279	-3.01847	0.91148	-3.31162	0.000927578	0.0646435	72.0314	14.8167	5.5399	2.18642	6.14647	0.990814	0	3.55275	2.14812	2.86653	nan
TENM1	ENSCDRG00005007282	468.32	-0.774152	0.234097	-3.30696	0.00094313	0.06545	626.119	417.831	515.21	806.789	594.842	243.74	268.756	436.396	290.712	482.806	teneurin transmembrane protein 1 [Source:HGNC Symbol;Acc:HGNC:8117]
FLNC	ENSCDRG00005006906	805.886	-0.702056	0.212587	-3.30245	0.000958457	0.0662342	1036.14	972.964	1449.24	748.849	786.065	679.698	576.842	632.982	760.434	415.647	filamin C [Source:HGNC Symbol;Acc:HGNC:3756]
LHFPL2	ENSCDRG00005000275	159.832	0.956675	0.290397	3.29437	0.000986439	0.0678827	72.0314	139.277	74.2346	135.011	115.417	350.748	139.84	145.663	240.589	185.506	LHFPL tetraspan subfamily member 2 [Source:NCBI gene;Acc:105084825]
ME1	ENSCDRG00005005271	143.452	0.620563	0.188728	3.28814	0.00100852	0.0691132	144.063	119.522	107.474	105.495	99.0264	151.595	187.911	189.48	128.887	201.067	malic enzyme 1 [Source:HGNC Symbol;Acc:HGNC:6983]
ABCA12	ENSCDRG00005009551	19.5812	-2.32267	0.707592	-3.28251	0.00102889	0.0701147	55.4088	33.5846	57.6149	6.01266	12.9759	3.96326	0	9.47401	14.3208	2.45703	ATP binding cassette subfamily A member 12 [Source:NCBI gene;Acc:105099626]
BCAT1	ENSCDRG00005019573	258.493	0.71169	0.216863	3.28175	0.00103166	0.0701147	144.063	142.24	175.061	251.438	254.054	253.648	382.376	340.472	268.515	373.059	branched chain amino acid transaminase 1 [Source:NCBI gene;Acc:105100061]
MS4A2	ENSCDRG00005000120	246.872	1.08239	0.330258	3.2774	0.00104768	0.0709105	88.6541	190.642	85.3144	280.955	135.905	539.994	264.386	282.444	378.069	222.361	membrane spanning 4-domains A2 [Source:NCBI gene;Acc:105094901]
ENSCDRG00005022226	ENSCDRG00005022226	366.295	0.996288	0.304118	3.27599	0.00105292	0.0709729	210.553	311.151	191.68	306.099	198.736	920.466	465.407	293.694	485.475	279.692	nan
PFKL	ENSCDRG00005015587	426.708	-0.509911	0.156081	-3.26697	0.00108706	0.0729749	498.679	390.174	527.398	595.8	493.083	299.226	375.821	407.382	309.329	370.192	phosphofructokinase, liver type [Source:HGNC Symbol;Acc:HGNC:8876]
S100A6	ENSCDRG00005016551	160.888	0.645082	0.197665	3.26351	0.00110041	0.0735711	49.8679	143.228	149.577	135.558	129.759	227.887	172.616	182.967	212.664	204.752	S100 calcium binding protein A6 [Source:NCBI gene;Acc:105089553]
NCAM1	ENSCDRG00005009841	1615.11	-0.430066	0.131836	-3.26211	0.00110585	0.0736352	1651.18	1639.72	2060.84	1885.24	2024.24	1134.48	1455.21	1493.93	1242.33	1563.9	neural cell adhesion molecule 1 [Source:HGNC Symbol;Acc:HGNC:7656]
CNTN6	ENSCDRG00005006079	24.2592	-1.36846	0.419756	-3.26013	0.00111361	0.0738529	27.7044	27.6579	57.6149	43.1818	17.7565	6.9357	17.4801	12.4346	15.0368	16.7897	contactin 6 [Source:HGNC Symbol;Acc:HGNC:2176]
UNC13C	ENSCDRG00005016110	208.742	-0.966663	0.297052	-3.25419	0.00113715	0.0742171	188.39	184.715	259.267	423.072	321.665	69.357	150.765	147.439	131.035	211.714	unc-13 homolog C [Source:HGNC Symbol;Acc:HGNC:23149]
FLRT1	ENSCDRG00005018850	26.6243	-1.27356	0.391326	-3.25447	0.00113603	0.0742171	60.9497	33.5846	34.3474	20.771	44.3912	17.8347	6.55502	18.948	10.0246	18.8372	fibronectin leucine rich transmembrane protein 1 [Source:NCBI gene;Acc:105101534]
TRHDE	ENSCDRG00005017523	70.4337	-1.14546	0.351674	-3.25717	0.00112531	0.0742171	105.277	79.0225	87.5304	140.477	75.1235	13.8714	41.5151	57.4362	39.3822	64.7017	thyrotropin releasing hormone degrading enzyme [Source:HGNC Symbol;Acc:HGNC:30748]
RANGRF	ENSCDRG00005014923	8.93835	1.90524	0.58524	3.25548	0.00113201	0.0742171	5.54088	4.93891	5.5399	1.63982	2.73176	8.91733	19.6651	14.211	11.4566	14.7422	RAN guanine nucleotide release factor [Source:NCBI gene;Acc:105102988]
CHPF	ENSCDRG00005001500	352.462	0.580665	0.178547	3.25217	0.00114528	0.074452	310.289	230.153	294.722	296.26	285.469	373.537	461.036	483.767	291.428	497.957	chondroitin polymerizing factor [Source:NCBI gene;Acc:105096119]
ADA2	ENSCDRG00005020780	82.1497	1.32618	0.408348	3.24767	0.00116356	0.0753426	27.7044	72.108	50.967	37.7157	40.9765	226.896	117.99	59.8047	141.06	46.274	adenosine deaminase 2 [Source:HGNC Symbol;Acc:HGNC:1839]
SPRED3	ENSCDRG00005002811	172.824	0.941878	0.290204	3.24557	0.00117215	0.0756013	166.226	96.8026	140.713	72.1519	122.246	217.979	388.931	198.362	138.912	185.915	sprouty related EVH1 domain containing 3 [Source:HGNC Symbol;Acc:HGNC:31041]
CHST8	ENSCDRG00005016814	205.863	-0.853086	0.262996	-3.24372	0.00117979	0.0757968	221.635	180.764	271.455	359.666	285.469	74.3111	203.206	172.309	131.751	158.069	carbohydrate sulfotransferase 8 [Source:HGNC Symbol;Acc:HGNC:15993]
SUSD2	ENSCDRG00005022027	172.17	-0.754215	0.232612	-3.24238	0.00118537	0.0758591	254.88	184.715	229.352	217.549	193.955	94.1273	168.246	130.86	168.985	79.0344	sushi domain containing 2 [Source:HGNC Symbol;Acc:HGNC:30667]
BCAP31	ENSCDRG00005020943	395.822	0.636752	0.196705	3.23709	0.00120756	0.0767885	243.799	273.615	286.967	393.009	340.105	346.785	528.772	612.85	393.822	538.498	B cell receptor associated protein 31 [Source:NCBI gene;Acc:105098705]
TUBB4B	ENSCDRG00005022239	816.129	-0.609584	0.188335	-3.23669	0.00120923	0.0767885	825.591	738.86	972.806	1391.66	995.728	523.15	616.172	782.79	589.301	725.232	tubulin beta 4B class IVb [Source:HGNC Symbol;Acc:HGNC:20771]
CILP	ENSCDRG00005001549	21.5119	-1.46977	0.455111	-3.22946	0.00124023	0.0783442	72.0314	18.7678	22.1596	26.237	24.5859	8.91733	6.55502	12.4346	16.4689	6.96158	cartilage intermediate layer protein [Source:NCBI gene;Acc:105100539]
SSR1	ENSCDRG00005009317	455.973	0.755055	0.233852	3.22877	0.00124326	0.0783442	182.849	296.334	320.206	430.725	450.058	499.37	452.296	700.484	474.734	752.669	signal sequence receptor subunit 1 [Source:NCBI gene;Acc:105099944]
ENSCDRG00005003756	ENSCDRG00005003756	77.1802	1.27559	0.396101	3.22037	0.00128026	0.0803682	22.1635	49.3891	37.6713	69.4188	39.6106	168.438	117.99	61.5811	162.541	42.998	nan
ENSCDRG00005021520	ENSCDRG00005021520	278.16	0.452058	0.140581	3.21563	0.00130156	0.0813948	182.849	227.19	245.971	269.476	234.249	372.546	308.086	303.168	298.589	339.479	nan
EPB41L4B	ENSCDRG00005010219	104.141	-0.639959	0.19913	-3.21378	0.00131001	0.0816129	121.899	132.363	160.657	103.855	120.198	78.2743	58.9952	82.3054	95.2333	87.634	erythrocyte membrane protein band 4.1 like 4B [Source:NCBI gene;Acc:105087932]
DTX3	ENSCDRG00005019411	116.868	-0.604484	0.188169	-3.21246	0.00131604	0.0816787	121.899	123.473	155.117	142.664	161.174	99.0814	72.1052	116.649	93.8012	82.7199	deltex E3 ubiquitin ligase 3 [Source:NCBI gene;Acc:105100337]
GRM7	ENSCDRG00005007785	216.212	-0.530457	0.165485	-3.20546	0.00134846	0.0827541	249.34	277.566	222.704	291.887	241.078	176.365	124.545	203.691	197.627	177.315	glutamate metabotropic receptor 7 [Source:NCBI gene;Acc:105093150]
SUSD4	ENSCDRG00005018999	189.788	-0.680842	0.212395	-3.20554	0.00134807	0.0827541	227.176	204.471	188.356	307.739	242.444	95.1181	131.1	165.203	161.825	174.449	sushi domain containing 4 [Source:HGNC Symbol;Acc:HGNC:25470]
PLOD3	ENSCDRG00005014592	127.72	0.657451	0.20499	3.20723	0.00134019	0.0827541	105.277	120.509	97.5022	74.3383	100.392	158.53	170.431	181.783	112.418	156.021	procollagen-lysine,2-oxoglutarate 5-dioxygenase 3 [Source:HGNC Symbol;Acc:HGNC:9083]
RGS12	ENSCDRG00005002591	151.207	-0.612837	0.191638	-3.19789	0.00138437	0.0832893	205.013	160.021	187.248	200.604	157.076	122.861	166.061	114.872	107.406	90.91	regulator of G protein signaling 12 [Source:HGNC Symbol;Acc:HGNC:9994]
ZMYM3	ENSCDRG00005017134	334.219	-0.441284	0.138021	-3.19723	0.00138756	0.0832893	387.861	339.797	374.497	411.594	407.716	237.795	323.381	312.05	253.478	294.024	zinc finger MYM-type containing 3 [Source:HGNC Symbol;Acc:HGNC:13054]
PLPPR4	ENSCDRG00005001016	63.8321	-0.954956	0.298274	-3.20161	0.00136664	0.0832893	110.818	60.2546	48.7511	101.669	102.441	27.7428	48.0702	38.4882	44.3945	55.6926	phospholipid phosphatase related 4 [Source:NCBI gene;Acc:105085063]
PLA2G6	ENSCDRG00005011621	125.97	-0.634933	0.198462	-3.19927	0.00137774	0.0832893	205.013	139.277	172.845	141.571	115.417	86.2008	113.62	107.175	79.4804	99.1001	phospholipase A2 group VI [Source:NCBI gene;Acc:105091954]
CD244	ENSCDRG00005015160	46.3263	1.32527	0.414453	3.19763	0.00138564	0.0832893	5.54088	42.4746	17.7277	32.2497	26.6347	130.787	56.8102	36.1197	60.8634	54.0546	CD244 molecule [Source:NCBI gene;Acc:105100124]
MGAT4A	ENSCDRG00005018207	179.477	0.626175	0.195764	3.19863	0.00138083	0.0832893	110.818	163.972	119.662	143.757	159.125	306.162	190.096	186.52	200.491	214.171	alpha-1,3-mannosyl-glycoprotein 4-beta-N-acetylglucosaminyltransferase A [Source:HGNC Symbol;Acc:HGNC:7047]
ENSCDRG00005014464	ENSCDRG00005014464	285.161	-0.725151	0.227033	-3.19404	0.00140298	0.0836445	371.239	251.884	392.225	374.424	383.13	132.769	310.271	250.469	168.985	216.218	regulating synaptic membrane exocytosis 3 [Source:HGNC Symbol;Acc:HGNC:21292]
KCNJ5	ENSCDRG00005005404	67.7944	0.982291	0.307552	3.1939	0.00140365	0.0836445	77.5723	55.3157	22.1596	34.4361	47.8059	67.3754	115.805	105.398	67.3077	84.7674	potassium inwardly rectifying channel subfamily J member 5 [Source:NCBI gene;Acc:105094272]
SYNPO	ENSCDRG00005002038	129.425	-0.74599	0.233771	-3.19112	0.00141723	0.0838458	238.258	127.424	159.549	116.973	176.882	80.2559	104.88	95.9243	122.443	71.6633	synaptopodin [Source:HGNC Symbol;Acc:HGNC:30672]
DENND3	ENSCDRG00005010232	130.778	0.863936	0.27069	3.1916	0.00141485	0.0838458	88.6541	100.754	83.0984	91.8296	94.2458	222.933	264.386	98.885	133.183	129.813	DENN domain containing 3 [Source:HGNC Symbol;Acc:HGNC:29134]
C7orf31	ENSCDRG00005000664	6.58117	-3.01654	0.946767	-3.18615	0.00144181	0.0849947	27.7044	8.89003	16.6197	1.09321	5.46353	0.990814	0	1.77638	2.86416	0.409505	chromosome unknown open reading frame, human C7orf31 [Source:NCBI gene;Acc:105095081]
IL1RAP	ENSCDRG00005011046	76.4739	-0.717313	0.225523	-3.18066	0.00146939	0.0857121	127.44	108.656	80.8825	70.5121	97.6606	54.4948	43.7001	53.8834	61.5794	65.9302	interleukin 1 receptor accessory protein [Source:NCBI gene;Acc:105097548]
KCNQ4	ENSCDRG00005014732	21.2088	-1.90372	0.598536	-3.18062	0.00146962	0.0857121	60.9497	21.7312	58.7229	8.74568	18.4394	3.96326	13.11	15.9874	4.29624	6.14257	potassium voltage-gated channel subfamily Q member 4 [Source:HGNC Symbol;Acc:HGNC:6298]
DNM1	ENSCDRG00005009936	708.063	-0.655215	0.205903	-3.18215	0.00146185	0.0857121	864.377	658.85	832.092	1018.87	959.532	335.886	506.922	695.155	514.832	694.11	dynamin 1 [Source:HGNC Symbol;Acc:HGNC:2972]
CREG1	ENSCDRG00005005365	144.793	0.851035	0.267687	3.17921	0.00147676	0.0858241	49.8679	98.7781	87.5304	157.969	110.636	214.016	126.73	179.414	162.541	260.445	cellular repressor of E1A stimulated genes 1 [Source:NCBI gene;Acc:105092726]
HPCAL4	ENSCDRG00005012456	364.707	-0.726924	0.229067	-3.17342	0.00150657	0.0866381	443.27	330.907	452.056	600.172	447.326	150.604	284.051	339.288	265.651	333.746	hippocalcin like 4 [Source:HGNC Symbol;Acc:HGNC:18212]
SMAP2	ENSCDRG00005014239	252.007	0.637697	0.200895	3.17429	0.00150205	0.0866381	144.063	214.349	234.892	191.858	185.76	348.767	426.076	292.51	226.269	255.531	small ArfGAP2 [Source:NCBI gene;Acc:105103375]
TIMP2	ENSCDRG00005019340	646.76	-0.395673	0.124677	-3.17358	0.00150573	0.0866381	725.855	667.74	776.693	742.836	760.113	449.83	583.397	628.837	595.029	537.27	TIMP metallopeptidase inhibitor 2 [Source:HGNC Symbol;Acc:HGNC:11821]
ITPK1	ENSCDRG00005000765	304.489	-0.421543	0.132923	-3.17134	0.00151735	0.0868806	349.075	332.882	381.145	352.56	327.129	248.694	262.201	268.825	300.021	222.361	inositol-tetrakisphosphate 1-kinase [Source:HGNC Symbol;Acc:HGNC:6177]
GLP1R	ENSCDRG00005014658	88.0666	1.19742	0.377666	3.17058	0.00152135	0.0868806	60.9497	28.6457	64.2628	45.9148	69.66	44.5866	142.025	158.098	77.3323	189.191	glucagon like peptide 1 receptor [Source:HGNC Symbol;Acc:HGNC:4324]
CNTN3	ENSCDRG00005005902	55.3852	-0.855879	0.270061	-3.1692	0.00152857	0.0869911	94.1949	78.0347	49.8591	83.6306	57.367	28.7336	28.4051	42.0409	49.4067	42.179	contactin 3 [Source:NCBI gene;Acc:105095276]
TFRC	ENSCDRG00005020067	226.235	0.806324	0.254573	3.16736	0.00153829	0.0872421	155.145	121.497	148.469	227.934	170.052	369.574	137.655	300.208	307.897	323.918	transferrin receptor [Source:NCBI gene;Acc:105101295]
LAPTM5	ENSCDRG00005015458	385.547	0.93531	0.295888	3.16103	0.00157213	0.0888552	205.013	343.748	204.976	261.824	301.86	950.191	412.966	313.234	549.202	312.452	lysosomal protein transmembrane 5 [Source:NCBI gene;Acc:105085819]
LRFN2	ENSCDRG00005015960	40.5176	-0.838718	0.265832	-3.15507	0.0016046	0.0900715	66.4905	52.3524	53.183	48.6478	40.9765	35.6693	32.7751	23.0929	22.9133	29.0748	leucine rich repeat and fibronectin type III domain containing 2 [Source:HGNC Symbol;Acc:HGNC:21226]
ENSCDRG00005021899	ENSCDRG00005021899	9.51999	2.23051	0.706771	3.15591	0.00159997	0.0900715	0	6.91447	1.10798	4.37284	2.04882	33.6877	19.6651	8.88188	10.7406	7.78059	nan
RNF150	ENSCDRG00005000887	120.894	-0.882012	0.279902	-3.15115	0.0016263	0.090364	199.472	91.8636	203.868	155.782	142.052	74.3111	41.5151	115.464	85.9248	98.6906	ring finger protein 150 [Source:HGNC Symbol;Acc:HGNC:23138]
ENSCDRG00005001032	ENSCDRG00005001032	7.05203	-3.10062	0.98375	-3.15183	0.00162249	0.090364	33.2453	3.95112	9.97181	3.27963	14.3418	0	0	0	2.86416	2.86653	nan
B3GAT1	ENSCDRG00005017781	514.64	-0.51519	0.163454	-3.1519	0.00162209	0.090364	498.679	785.286	699.135	525.834	508.791	464.692	458.851	430.475	402.414	372.24	beta-1,3-glucuronyltransferase 1 [Source:HGNC Symbol;Acc:HGNC:921]
ENSCDRG00005007121	ENSCDRG00005007121	1054.49	-0.345101	0.109625	-3.14801	0.00164385	0.090726	1063.85	1180.4	1193.29	1215.65	1225.2	900.65	1079.39	870.424	988.851	827.199	fatty acid desaturase 2 [Source:HGNC Symbol;Acc:HGNC:3575]
SNORA73	ENSCDRG00005009866	136.861	0.791901	0.251552	3.14806	0.00164356	0.090726	144.063	89.8881	73.1266	109.868	95.6117	245.722	111.435	159.282	206.935	132.679	Small nucleolar RNA SNORA73 family [Source:RFAM;Acc:RF00045]
MYH11	ENSCDRG00005014659	582.901	-1.11133	0.353434	-3.14438	0.00166439	0.0915528	465.434	837.638	627.116	615.477	1436.22	171.411	303.716	349.354	736.805	285.834	myosin heavy chain 11 [Source:HGNC Symbol;Acc:HGNC:7569]
PLXNB2	ENSCDRG00005015429	584.377	0.698681	0.222436	3.14104	0.00168348	0.0922942	393.402	530.438	447.624	402.301	443.912	915.512	1088.13	560.743	539.178	522.528	plexin B2 [Source:HGNC Symbol;Acc:HGNC:9104]
NELFE	ENSCDRG00005012632	71.5075	0.779675	0.248359	3.13931	0.00169349	0.0925342	77.5723	37.5357	52.075	50.2877	51.2206	84.2192	131.1	77.5684	83.0606	70.4348	negative elongation factor complex member E [Source:HGNC Symbol;Acc:HGNC:13974]
AKAP12	ENSCDRG00005020815	2508.02	-0.530839	0.169244	-3.13652	0.00170966	0.0931083	2077.83	2683.8	3233.08	3746.43	3060.26	1679.43	2355.44	2332.97	2088.69	1822.3	A-kinase anchoring protein 12 [Source:HGNC Symbol;Acc:HGNC:370]
TAF7L	ENSCDRG00005012873	7.39986	-3.56546	1.13741	-3.13471	0.00172025	0.0933758	49.8679	11.8534	3.32394	1.63982	2.73176	0	0	0.592125	3.5802	0.409505	TATA-box binding protein associated factor 7 like [Source:HGNC Symbol;Acc:HGNC:11548]
PPARG	ENSCDRG00005017141	12.7514	-2.0255	0.647111	-3.13006	0.00174771	0.0942444	33.2453	11.8534	40.9952	4.91945	11.61	7.92651	6.55502	3.55275	3.5802	3.27604	peroxisome proliferator activated receptor gamma [Source:NCBI gene;Acc:105093103]
SYT17	ENSCDRG00005016725	155.362	-0.851494	0.272035	-3.13009	0.00174755	0.0942444	249.34	133.35	183.925	236.68	204.199	84.2192	67.7352	185.927	106.69	101.557	synaptotagmin 17 [Source:NCBI gene;Acc:105091146]
ENSCDRG00005003120	ENSCDRG00005003120	72.5839	0.716657	0.229112	3.12798	0.00176012	0.0944199	44.327	64.2058	53.183	56.3003	51.2206	107.008	100.51	63.3574	103.826	81.9009	nan
TROAP	ENSCDRG00005006077	14.9042	-1.74829	0.558988	-3.12759	0.00176244	0.0944199	49.8679	19.7556	26.5915	13.1185	9.56117	4.95407	2.18501	5.92125	12.1727	4.91405	trophinin associated protein [Source:NCBI gene;Acc:105103775]
COL6A3	ENSCDRG00005014396	51.2353	-0.968571	0.309829	-3.12615	0.00177113	0.0944289	72.0314	94.827	62.0468	34.4361	75.1235	28.7336	43.7001	31.9748	40.8143	28.6653	collagen type VI alpha 3 chain [Source:HGNC Symbol;Acc:HGNC:2213]
ANKS6	ENSCDRG00005000043	38.8251	-1.1344	0.362933	-3.12566	0.00177409	0.0944289	66.4905	74.0836	47.6431	29.5167	53.2694	32.6969	8.74003	22.5008	33.6539	19.6562	ankyrin repeat and sterile alpha motif domain containing 6 [Source:HGNC Symbol;Acc:HGNC:26724]
PRPSAP1	ENSCDRG00005003821	227.703	0.531429	0.17026	3.12129	0.00180063	0.0955323	127.44	187.678	161.765	224.655	214.443	264.547	238.166	252.838	314.341	291.158	phosphoribosyl pyrophosphate synthetase associated protein 1 [Source:HGNC Symbol;Acc:HGNC:9466]
STK32B	ENSCDRG00005000325	43.2783	-1.03529	0.332036	-3.11799	0.00182088	0.0962958	38.7861	34.5723	62.0468	60.6732	94.2458	31.706	15.295	33.7512	32.2218	29.4843	serine/threonine kinase 32B [Source:HGNC Symbol;Acc:HGNC:14217]
TUB	ENSCDRG00005011831	241.924	-0.711565	0.228387	-3.11561	0.00183565	0.0967661	476.516	222.251	296.938	277.675	237.663	147.631	260.016	179.414	150.368	170.763	TUB bipartite transcription factor [Source:NCBI gene;Acc:105093978]
ASIC1	ENSCDRG00005005067	74.9449	-0.66349	0.213072	-3.11392	0.00184617	0.0970096	60.9497	107.668	109.69	94.0161	78.5382	53.504	74.2902	52.6992	58.7152	59.3782	acid sensing ion channel subunit 1 [Source:NCBI gene;Acc:105097188]
ENSCDRG00005015739	ENSCDRG00005015739	10.3229	2.46458	0.793093	3.10755	0.00188642	0.0986185	0	4.93891	3.32394	4.91945	0.682941	36.6601	24.0351	18.948	6.44436	3.27604	nan
IFNGR1	ENSCDRG00005014662	334.652	0.838544	0.269929	3.10653	0.00189295	0.0986185	110.818	269.664	186.141	307.192	310.738	626.194	301.531	339.288	516.981	377.973	interferon gamma receptor 1 [Source:NCBI gene;Acc:105092040]
MYL3	ENSCDRG00005007200	10.2722	-3.19148	1.02744	-3.10625	0.00189478	0.0986185	55.4088	7.90225	22.1596	0	7.51235	2.97244	2.18501	0.592125	3.5802	0.409505	myosin light chain 3 [Source:NCBI gene;Acc:105103584]
MOCS1	ENSCDRG00005015887	76.2709	0.94393	0.304377	3.10118	0.00192748	0.0996897	110.818	41.4868	35.4553	39.3556	50.5376	94.1273	126.73	61.5811	105.974	96.6431	molybdenum cofactor synthesis 1 [Source:NCBI gene;Acc:105086731]
CPPED1	ENSCDRG00005018141	69.4965	0.658613	0.21237	3.10125	0.00192708	0.0996897	44.327	46.4257	64.2628	57.3935	55.3182	87.1916	65.5502	84.6739	103.826	85.9959	calcineurin like phosphoesterase domain containing 1 [Source:NCBI gene;Acc:105089030]
ABCG1	ENSCDRG00005010367	73.4329	-0.645018	0.208152	-3.09879	0.00194314	0.0999302	105.277	95.8148	96.3942	73.2451	84.0017	50.5315	50.2552	57.4362	52.9869	68.3873	ATP binding cassette subfamily G member 1 [Source:HGNC Symbol;Acc:HGNC:73]
AMOT	ENSCDRG00005007728	349.595	-0.400078	0.129154	-3.09769	0.00195036	0.0999302	332.453	475.123	394.441	397.928	379.032	315.079	294.976	275.93	316.49	314.499	angiomotin [Source:HGNC Symbol;Acc:HGNC:17810]
ENSCDRG00005021784	ENSCDRG00005021784	92.6034	1.1107	0.358481	3.09834	0.00194608	0.0999302	22.1635	44.4502	84.2064	57.9401	77.8553	157.539	39.3301	142.702	138.912	160.935	nan
BAK1	ENSCDRG00005021730	66.5594	1.02016	0.329628	3.0949	0.00196882	0.0999422	27.7044	38.5235	50.967	49.7411	44.3912	106.017	161.691	49.7385	68.0238	68.7968	BCL2 antagonist/killer 1 [Source:NCBI gene;Acc:105101376]
SV2B	ENSCDRG00005020222	243.252	-0.78977	0.255175	-3.09501	0.00196809	0.0999422	288.126	255.835	237.108	411.047	352.398	108.99	113.62	232.113	213.38	219.904	synaptic vesicle glycoprotein 2B [Source:NCBI gene;Acc:105085455]
JAK3	ENSCDRG00005013213	64.0134	1.27767	0.412825	3.09494	0.00196852	0.0999422	44.327	52.3524	40.9952	21.8642	29.3665	191.227	93.9553	47.9622	70.1719	47.912	Janus kinase 3 [Source:HGNC Symbol;Acc:HGNC:6193]
WFS1	ENSCDRG00005001375	365.321	0.471414	0.152668	3.08783	0.00201623	0.101804	343.534	273.615	384.469	285.874	253.371	485.499	406.411	390.211	426.044	404.181	wolframin ER transmembrane glycoprotein [Source:HGNC Symbol;Acc:HGNC:12762]
ENSCDRG00005016421	ENSCDRG00005016421	7.11598	2.76057	0.894085	3.08759	0.00201787	0.101804	0	1.97556	3.32394	0.546605	2.04882	18.8255	28.4051	3.55275	10.0246	2.45703	nan
C1QTNF1	ENSCDRG00005019284	36.0483	-0.970722	0.314703	-3.08456	0.00203853	0.102531	72.0314	43.4624	57.6149	36.6225	32.0982	19.8163	30.5901	19.5401	28.6416	20.0657	C1q and TNF related 1 [Source:HGNC Symbol;Acc:HGNC:14324]
GABRA1	ENSCDRG00005010066	50.0101	-1.20021	0.389763	-3.07934	0.00207457	0.104026	22.1635	58.2791	74.2346	98.3889	91.5141	9.90814	34.9601	40.8567	30.0737	39.7219	gamma-aminobutyric acid type A receptor alpha1 subunit [Source:NCBI gene;Acc:105097693]
GJD2	ENSCDRG00005001987	7.25513	-3.35691	1.09065	-3.0779	0.00208464	0.104213	44.327	1.97556	7.75585	0.546605	12.9759	0	0	1.18425	2.14812	1.63802	gap junction protein delta 2 [Source:NCBI gene;Acc:105089984]
ARHGAP45	ENSCDRG00005013737	100.81	1.19754	0.389982	3.07076	0.00213514	0.106414	38.7861	83.9614	75.3426	63.9528	38.2447	262.566	194.466	86.4503	104.542	59.7877	Rho GTPase activating protein 45 [Source:HGNC Symbol;Acc:HGNC:17102]
FST	ENSCDRG00005010829	12.0891	-2.72872	0.889103	-3.06907	0.00214723	0.106693	55.4088	14.8167	22.1596	1.63982	12.9759	0.990814	0	5.32913	7.1604	0.409505	follistatin [Source:HGNC Symbol;Acc:HGNC:3971]
CPA5	ENSCDRG00005001058	16.6063	2.25957	0.73679	3.06678	0.00216379	0.107192	0	6.91447	16.6197	1.09321	2.04882	43.5958	52.4402	9.47401	12.1727	21.7037	carboxypeptidase A5 [Source:NCBI gene;Acc:105085386]
ETV7	ENSCDRG00005011656	12.1487	-1.80416	0.588515	-3.06562	0.00217221	0.107286	38.7861	11.8534	23.2676	8.19908	15.7076	9.90814	0	4.14488	4.29624	5.32356	ETS variant transcription factor 7 [Source:NCBI gene;Acc:105101334]
PSD2	ENSCDRG00005000191	339.14	-0.43743	0.142762	-3.06405	0.00218364	0.107528	376.78	360.54	448.732	386.45	370.837	305.171	345.231	272.97	232.713	291.977	pleckstrin and Sec7 domain containing 2 [Source:NCBI gene;Acc:105098114]
COTL1	ENSCDRG00005001729	112.53	0.766582	0.25075	3.05715	0.00223451	0.109704	77.5723	104.705	55.399	78.1645	97.6606	210.053	137.655	127.307	133.183	103.605	coactosin like F-actin binding protein 1 [Source:NCBI gene;Acc:105089461]
IDH2	ENSCDRG00005008978	139.473	0.595995	0.19502	3.05608	0.00224253	0.109771	105.277	102.729	109.69	108.228	127.71	221.942	139.84	143.886	193.331	142.098	isocitrate dehydrogenase (NADP(+)) 2 [Source:HGNC Symbol;Acc:HGNC:5383]
GC	ENSCDRG00005019679	6.70328	-2.93562	0.96133	-3.05371	0.00226033	0.110313	33.2453	9.87781	12.1878	1.09321	4.78059	0	0	2.3685	1.43208	2.04752	GC vitamin D binding protein [Source:HGNC Symbol;Acc:HGNC:4187]
ENSCDRG00005006546	ENSCDRG00005006546	111.558	-0.895173	0.293491	-3.05008	0.00228779	0.111324	121.899	126.436	125.202	173.82	178.248	30.7152	67.7352	105.99	93.8012	91.729	nan
ICE1	ENSCDRG00005004943	557.133	-0.429941	0.141087	-3.04736	0.00230862	0.111497	637.201	540.316	748.994	643.901	629.672	432.986	469.777	541.795	398.834	527.851	interactor of little elongation complex ELL subunit 1 [Source:NCBI gene;Acc:105090122]
ENSCDRG00005004657	ENSCDRG00005004657	11.7047	1.86116	0.610825	3.04696	0.00231169	0.111497	0	5.92669	8.86383	3.27963	4.09765	14.8622	43.7001	14.211	8.59248	13.5136	nan
PTGIS	ENSCDRG00005013978	50.5136	-0.890162	0.292144	-3.047	0.00231139	0.111497	66.4905	70.1325	84.2064	46.4614	64.8794	28.7336	19.6651	46.1858	47.2586	31.1223	prostaglandin I2 synthase [Source:HGNC Symbol;Acc:HGNC:9603]
ENSCDRG00005016146	ENSCDRG00005016146	341.05	0.72163	0.23731	3.04088	0.00235892	0.113442	193.931	265.713	299.154	247.065	269.762	595.479	554.992	241.587	401.698	341.117	nan
PRLR	ENSCDRG00005001501	27.2137	-1.42245	0.468059	-3.03905	0.00237324	0.113798	88.6541	13.8289	44.3192	28.4235	29.3665	8.91733	8.74003	20.7244	16.4689	12.6946	prolactin receptor [Source:HGNC Symbol;Acc:HGNC:9446]
CCDC141	ENSCDRG00005005345	144.561	0.794968	0.261672	3.03803	0.00238128	0.113852	72.0314	146.192	81.9905	120.253	101.075	229.869	150.765	110.135	193.331	239.97	coiled-coil domain containing 141 [Source:HGNC Symbol;Acc:HGNC:26821]
RHEB	ENSCDRG00005012087	118.001	0.654624	0.215862	3.0326	0.00242453	0.115475	60.9497	81.9858	97.5022	122.44	87.4164	126.824	124.545	146.255	139.628	192.467	Ras homolog, mTORC1 binding [Source:NCBI gene;Acc:105098696]
PKD2L1	ENSCDRG00005019183	22.9288	-1.89063	0.623618	-3.03172	0.00243166	0.115475	83.1132	38.5235	46.5351	4.91945	9.56117	7.92651	13.11	10.6583	7.1604	7.78059	polycystin 2 like 1, transient receptor potential cation channel [Source:NCBI gene;Acc:105084319]
TYROBP	ENSCDRG00005012017	42.4991	1.17808	0.388881	3.02941	0.00245034	0.115475	22.1635	26.6701	28.8075	28.9701	21.8541	116.916	50.2552	35.5275	62.2954	31.5318	TYRO protein tyrosine kinase binding protein [Source:HGNC Symbol;Acc:HGNC:12449]
PITPNC1	ENSCDRG00005020499	130.141	0.528286	0.174357	3.02991	0.00244628	0.115475	105.277	88.9003	113.014	122.44	103.124	158.53	146.395	140.334	140.344	183.049	phosphatidylinositol transfer protein cytoplasmic 1 [Source:HGNC Symbol;Acc:HGNC:21045]
IRF8	ENSCDRG00005010228	194.795	1.01156	0.333807	3.03038	0.00244244	0.115475	77.5723	177.801	117.446	136.105	129.759	536.03	163.876	155.137	264.219	190.01	interferon regulatory factor 8 [Source:HGNC Symbol;Acc:HGNC:5358]
CTXN1	ENSCDRG00005013495	81.6756	-0.818325	0.271199	-3.01744	0.0025492	0.11979	166.226	86.9247	103.042	107.135	63.5135	46.5683	80.8453	63.9496	43.6784	54.8736	cortexin 1 [Source:NCBI gene;Acc:105087574]
ENSCDRG00005016552	ENSCDRG00005016552	67.637	0.988023	0.327862	3.01353	0.00258229	0.120376	27.7044	53.3402	26.5915	66.1392	47.1229	143.668	56.8102	66.9102	101.678	86.4055	nan
PCDH8	ENSCDRG00005011868	39.9499	-1.20997	0.401533	-3.01337	0.00258363	0.120376	38.7861	50.3768	60.9389	68.8722	53.2694	9.90814	56.8102	20.7244	13.6048	26.2083	protocadherin 8 [Source:HGNC Symbol;Acc:HGNC:8660]
ENSCDRG00005018301	ENSCDRG00005018301	213.872	0.650315	0.21569	3.01505	0.00256937	0.120376	138.522	155.082	165.089	195.138	174.833	323.996	159.506	223.231	349.427	253.893	inhibitor of DNA binding 3, HLH protein [Source:NCBI gene;Acc:105088886]
LRRC55	ENSCDRG00005002226	433.985	-0.501135	0.166504	-3.00974	0.00261471	0.120974	526.383	466.233	662.572	483.199	409.082	388.399	332.121	431.659	317.922	322.28	leucine rich repeat containing 55 [Source:HGNC Symbol;Acc:HGNC:32324]
ARMH1	ENSCDRG00005013271	33.0905	-1.10359	0.366971	-3.0073	0.00263582	0.120974	60.9497	32.5968	39.8873	55.2071	38.2447	9.90814	30.5901	23.0929	12.1727	28.2558	armadillo like helical domain containing 1 [Source:HGNC Symbol;Acc:HGNC:34345]
ZNF483	ENSCDRG00005006538	206.44	-0.83521	0.277414	-3.0107	0.00260642	0.120974	238.258	185.703	329.07	314.298	253.371	63.4121	185.726	181.19	127.455	185.915	zinc finger protein 483 [Source:HGNC Symbol;Acc:HGNC:23384]
PTPRC	ENSCDRG00005011706	154	0.905468	0.300904	3.00915	0.00261976	0.120974	105.277	164.959	89.7463	98.9355	76.4894	358.675	194.466	139.742	147.504	164.211	protein tyrosine phosphatase receptor type C [Source:HGNC Symbol;Acc:HGNC:9666]
ENSCDRG00005015797	ENSCDRG00005015797	39.5547	-0.965494	0.320989	-3.00787	0.00263085	0.120974	27.7044	48.4013	64.2628	55.2071	64.1964	40.6234	13.11	20.1323	33.6539	28.2558	nan
CALR	ENSCDRG00005022183	625.287	0.591807	0.196826	3.00675	0.00264059	0.120974	293.667	449.44	491.943	611.104	628.306	720.322	607.432	826.015	693.842	930.804	calreticulin [Source:NCBI gene;Acc:105100758]
PRKD3	ENSCDRG00005017670	136.717	0.701157	0.233429	3.00373	0.00266691	0.121503	94.1949	117.546	85.3144	113.694	107.222	254.639	131.1	124.346	190.467	148.65	protein kinase D3 [Source:NCBI gene;Acc:105103635]
PEX5	ENSCDRG00005019720	188.416	0.667888	0.222291	3.00457	0.00265958	0.121503	127.44	149.155	175.061	135.558	131.808	193.209	378.006	203.099	186.886	203.933	peroxisomal biogenesis factor 5 [Source:HGNC Symbol;Acc:HGNC:9719]
SLC8A3	ENSCDRG00005003813	197.387	-0.560059	0.186739	-2.99915	0.0027073	0.122327	221.635	317.078	213.84	198.964	228.102	138.714	128.915	157.505	184.022	185.096	solute carrier family 8 member A3 [Source:NCBI gene;Acc:105086149]
SLC29A4	ENSCDRG00005018363	103.637	-0.979033	0.32641	-2.9994	0.00270512	0.122327	144.063	98.7781	156.225	166.168	116.1	33.6877	144.21	55.6598	55.135	66.3397	solute carrier family 29 member 4 [Source:HGNC Symbol;Acc:HGNC:23097]
ENSCDRG00005011058	ENSCDRG00005011058	205.873	0.504178	0.168026	3.00059	0.00269456	0.122327	116.358	164.959	196.112	202.244	154.345	279.41	262.201	217.902	244.886	220.313	nan
ENSCDRG00005001205	ENSCDRG00005001205	14.6233	-1.58924	0.530202	-2.99742	0.00272276	0.122353	22.1635	15.8045	15.5117	19.1312	39.6106	4.95407	0	11.2504	7.1604	10.6471	nan
ENSCDRG00005021552	ENSCDRG00005021552	10.6214	-3.1142	1.03875	-2.99802	0.00271744	0.122353	77.5723	11.8534	4.43192	0.546605	2.04882	0.990814	2.18501	1.77638	3.5802	1.22851	nan
TNS1	ENSCDRG00005016604	1212.26	-0.417322	0.139586	-2.98971	0.00279245	0.124803	1340.89	1332.52	1574.44	1127.65	1550.96	1014.59	1138.39	878.714	1202.95	961.517	tensin 1 [Source:HGNC Symbol;Acc:HGNC:11973]
SEL1L2	ENSCDRG00005005645	10.6445	-2.62471	0.877785	-2.99016	0.00278834	0.124803	66.4905	6.91447	12.1878	3.27963	3.4147	1.98163	6.55502	2.96063	1.43208	1.22851	SEL1L2 adaptor subunit of ERAD E3 ligase [Source:HGNC Symbol;Acc:HGNC:15897]
MOB1A	ENSCDRG00005005596	130.057	0.714422	0.239405	2.98415	0.00284363	0.126746	88.6541	104.705	73.1266	114.24	108.588	236.805	124.545	120.201	187.602	142.098	MOB kinase activator 1A [Source:NCBI gene;Acc:105096569]
RPS6KA3	ENSCDRG00005021577	120.118	0.867611	0.290987	2.98162	0.00286732	0.126991	16.6226	69.1447	90.8543	133.918	98.3435	168.438	133.285	186.52	132.467	171.582	ribosomal protein S6 kinase A3 [Source:HGNC Symbol;Acc:HGNC:10432]
ZFP92	ENSCDRG00005020817	156.309	-0.502928	0.168706	-2.98108	0.0028723	0.126991	216.094	161.008	155.117	178.193	209.663	111.962	142.025	145.071	128.887	115.071	ZFP92 zinc finger protein [Source:HGNC Symbol;Acc:HGNC:12865]
SPRYD3	ENSCDRG00005005926	194.045	-0.469445	0.157405	-2.9824	0.00285997	0.126991	216.094	184.715	248.187	250.345	224.005	142.677	172.616	180.598	175.43	145.784	SPRY domain containing 3 [Source:NCBI gene;Acc:105094578]
ELF1	ENSCDRG00005011557	80.2978	0.704896	0.236704	2.97796	0.00290173	0.12765	38.7861	70.1325	53.183	64.4994	71.7088	133.76	72.1052	94.148	117.43	87.2245	E74 like ETS transcription factor 1 [Source:NCBI gene;Acc:105098493]
BIN2	ENSCDRG00005013528	106.174	0.924938	0.310605	2.97786	0.00290272	0.12765	83.1132	104.705	66.4788	61.2198	53.9523	251.667	104.88	89.4109	132.467	113.842	bridging integrator 2 [Source:HGNC Symbol;Acc:HGNC:1053]
CAMKK1	ENSCDRG00005014884	119.315	-0.818323	0.275308	-2.97239	0.00295491	0.129598	99.7358	122.485	212.732	177.1	140.003	48.5499	135.47	88.2267	93.0851	75.7583	calcium/calmodulin dependent protein kinase kinase 1 [Source:NCBI gene;Acc:105095748]
DAPK1	ENSCDRG00005018762	755.293	0.492642	0.165816	2.97102	0.00296815	0.129833	609.497	475.123	608.281	761.967	679.526	776.798	904.593	1052.21	707.447	977.487	death associated protein kinase 1 [Source:HGNC Symbol;Acc:HGNC:2674]
THBS2	ENSCDRG00005018864	135.299	0.760822	0.256321	2.96823	0.00299516	0.130638	77.5723	127.424	89.7463	106.041	94.2458	255.63	179.171	107.175	189.034	126.946	thrombospondin 2 [Source:HGNC Symbol;Acc:HGNC:11786]
SARAF	ENSCDRG00005018915	308.891	0.674162	0.227245	2.96667	0.00301039	0.130638	221.635	173.849	189.464	295.713	307.323	301.207	321.196	396.724	332.242	549.555	store-operated calcium entry associated regulatory factor [Source:NCBI gene;Acc:105095793]
ARMC4	ENSCDRG00005019858	38.4972	-0.998197	0.336435	-2.96699	0.00300735	0.130638	44.327	55.3157	59.8309	63.4062	35.5129	16.8438	17.4801	40.2645	20.0491	31.9414	armadillo repeat containing 4 [Source:NCBI gene;Acc:105100618]
CD163	ENSCDRG00005021289	701.445	1.4848	0.500673	2.9656	0.00302092	0.13075	221.635	665.764	323.53	274.396	356.495	2216.45	1210.49	396.132	707.447	642.103	CD163 molecule [Source:NCBI gene;Acc:105098183]
C12orf43	ENSCDRG00005019275	47.6399	-0.75541	0.255295	-2.95897	0.00308674	0.133248	83.1132	47.4135	72.0186	53.5673	50.5376	37.6509	26.2201	34.3433	32.2218	39.3124	chromosome 12 open reading frame 43 [Source:HGNC Symbol;Acc:HGNC:25719]
CEP20	ENSCDRG00005015036	22.5752	-1.34635	0.455263	-2.95729	0.00310353	0.133622	66.4905	23.7067	28.8075	28.9701	21.1712	12.8806	0	13.0268	17.185	13.5136	FGFR1OP N-terminal like [Source:NCBI gene;Acc:105091153]
TENT4B	ENSCDRG00005000655	47.4247	0.764251	0.258786	2.95321	0.00314486	0.133741	27.7044	32.5968	24.3755	42.6352	43.7082	51.5223	65.5502	66.3181	55.135	64.7017	terminal nucleotidyltransferase 4B [Source:HGNC Symbol;Acc:HGNC:30758]
SIAH3	ENSCDRG00005007643	37.752	-0.931605	0.315358	-2.95412	0.00313566	0.133741	55.4088	29.6334	59.8309	53.5673	48.4888	13.8714	37.1451	26.0535	26.4935	27.0273	siah E3 ubiquitin protein ligase family member 3 [Source:HGNC Symbol;Acc:HGNC:30553]
DDOST	ENSCDRG00005008944	185.168	0.49249	0.166758	2.95332	0.00314374	0.133741	149.604	153.106	134.065	160.155	168.686	167.448	253.461	211.389	204.787	248.979	dolichyl-diphosphooligosaccharide--protein glycosyltransferase non-catalytic subunit [Source:NCBI gene;Acc:105088856]
RAC3	ENSCDRG00005008327	111.94	-0.595733	0.201738	-2.95301	0.00314693	0.133741	160.685	96.8026	150.685	125.719	142.735	69.357	102.695	98.2928	93.8012	78.6249	Rac family small GTPase 3 [Source:HGNC Symbol;Acc:HGNC:9803]
SRPRA	ENSCDRG00005018025	381.628	0.455476	0.154189	2.954	0.00313683	0.133741	210.553	323.992	334.61	348.734	370.837	407.225	408.596	512.189	411.007	488.539	SRP receptor subunit alpha [Source:NCBI gene;Acc:105094261]
FCRL1	ENSCDRG00005016928	6.06739	-2.6391	0.894072	-2.95177	0.00315954	0.13393	5.54088	7.90225	18.8356	2.18642	18.4394	0	0	2.96063	3.5802	1.22851	Fc receptor like 1 [Source:NCBI gene;Acc:105102704]
CX3CR1	ENSCDRG00005019729	159.125	0.967333	0.328234	2.94709	0.00320783	0.13528	55.4088	135.326	100.826	123.533	114.051	424.068	159.506	142.702	204.787	131.041	C-X3-C motif chemokine receptor 1 [Source:NCBI gene;Acc:105084638]
ZC3H12C	ENSCDRG00005021920	69.8701	0.755075	0.256197	2.94724	0.00320624	0.13528	33.2453	62.2302	28.8075	67.779	60.0988	87.1916	85.2153	86.4503	90.221	97.4621	zinc finger CCCH-type containing 12C [Source:HGNC Symbol;Acc:HGNC:29362]
CASKIN1	ENSCDRG00005015185	584.281	-0.4266	0.144833	-2.94546	0.00322472	0.135645	692.61	561.06	752.318	689.269	648.794	433.977	644.577	495.609	447.525	477.073	CASK interacting protein 1 [Source:HGNC Symbol;Acc:HGNC:20879]
ENSCDRG00005013205	ENSCDRG00005013205	59.9942	0.674316	0.229153	2.94264	0.00325422	0.136536	33.2453	42.4746	48.7511	43.1818	58.7329	83.2284	65.5502	62.1732	85.2087	77.3964	nan
TM4SF1	ENSCDRG00005015022	51.1428	0.871217	0.296713	2.93623	0.00332232	0.139039	22.1635	40.499	22.1596	42.0886	46.44	90.1641	74.2902	47.9622	68.7398	56.9211	transmembrane 4 L six family member 1 [Source:NCBI gene;Acc:105089500]
PGBD5	ENSCDRG00005014288	99.5405	-0.643899	0.219514	-2.93329	0.00335389	0.139543	177.308	91.8636	109.69	111.507	122.246	57.4672	104.88	71.6472	73.036	75.7583	piggyBac transposable element derived 5 [Source:HGNC Symbol;Acc:HGNC:19405]
ABCC8	ENSCDRG00005014728	48.5771	-1.05954	0.361132	-2.93395	0.00334677	0.139543	88.6541	72.108	87.5304	32.7963	47.1229	22.7887	52.4402	37.3039	22.9133	22.1132	ATP binding cassette subfamily C member 8 [Source:NCBI gene;Acc:105086704]
ITGBL1	ENSCDRG00005018846	33.7559	-1.02571	0.349744	-2.93274	0.00335983	0.139543	44.327	32.5968	66.4788	37.1691	43.0253	11.8898	39.3301	21.9086	17.901	22.9323	integrin subunit beta like 1 [Source:HGNC Symbol;Acc:HGNC:6164]
ENSCDRG00005002730	ENSCDRG00005002730	6.66151	-2.51342	0.858323	-2.92829	0.00340835	0.140143	27.7044	7.90225	11.0798	1.63982	8.19529	1.98163	4.37001	1.18425	2.14812	0.409505	olfactory receptor 4F3/4F16/4F29-like [Source:NCBI gene;Acc:105089963]
ENSCDRG00005002527	ENSCDRG00005002527	24.7296	-1.4325	0.489153	-2.92853	0.00340568	0.140143	72.0314	23.7067	36.5633	28.4235	19.8053	14.8622	26.2201	8.28976	12.8887	4.50455	nan
PDGFA	ENSCDRG00005018618	60.671	-0.857762	0.292796	-2.92955	0.00339449	0.140143	110.818	66.1813	70.9107	85.817	66.9282	41.6142	15.295	59.8047	39.3822	49.9596	platelet derived growth factor subunit A [Source:HGNC Symbol;Acc:HGNC:8799]
ENSCDRG00005017515	ENSCDRG00005017515	74.4289	0.764773	0.261096	2.92909	0.0033996	0.140143	49.8679	62.2302	33.2394	57.3935	72.3917	97.0998	63.3652	90.0031	96.6653	122.032	cell division cycle 14B [Source:NCBI gene;Acc:105084682]
ENSCDRG00005009670	ENSCDRG00005009670	51.2349	0.764504	0.261208	2.9268	0.00342464	0.140462	27.7044	32.5968	37.6713	51.9275	36.8788	68.3662	43.7001	62.7653	73.7521	76.9868	nan
FSTL4	ENSCDRG00005003110	66.3139	-0.914459	0.312761	-2.92383	0.00345753	0.141107	138.522	66.1813	110.798	75.4315	49.8547	67.3754	32.7751	35.5275	46.5426	40.1314	follistatin like 4 [Source:HGNC Symbol;Acc:HGNC:21389]
NECTIN1	ENSCDRG00005021272	209.576	-0.602344	0.20599	-2.92415	0.00345404	0.141107	299.207	313.127	270.347	154.689	229.468	162.494	201.021	149.808	160.393	155.202	nectin cell adhesion molecule 1 [Source:HGNC Symbol;Acc:HGNC:9706]
CYFIP2	ENSCDRG00005000418	1296.89	-0.484812	0.165867	-2.92289	0.00346794	0.141181	1429.55	1318.69	1612.11	1617.95	1584.42	751.037	1105.61	1358.93	947.32	1243.26	cytoplasmic FMR1 interacting protein 2 [Source:NCBI gene;Acc:105095140]
SLC34A2	ENSCDRG00005014773	13.1988	-2.46668	0.844828	-2.91974	0.00350318	0.14206	72.0314	16.7923	18.8356	1.09321	4.78059	1.98163	4.37001	4.737	5.72832	1.63802	solute carrier family 34 member 2 [Source:NCBI gene;Acc:105098372]
MPPED1	ENSCDRG00005006359	14.4509	-1.79618	0.615251	-2.91942	0.00350681	0.14206	55.4088	29.6334	15.5117	4.91945	10.2441	6.9357	4.37001	5.92125	5.01228	6.55207	metallophosphoesterase domain containing 1 [Source:NCBI gene;Acc:105091862]
SLC16A4	ENSCDRG00005001515	25.6988	0.938199	0.321467	2.91849	0.00351731	0.142136	5.54088	21.7312	17.7277	19.6778	17.7565	33.6877	34.9601	27.8299	43.6784	34.3984	solute carrier family 16 member 4 [Source:NCBI gene;Acc:105085665]
STING1	ENSCDRG00005000344	151.564	0.837473	0.287295	2.91502	0.0035566	0.142661	138.522	127.424	77.5585	106.588	98.3435	332.914	192.281	114.872	191.183	135.955	Camelus dromedarius stimulator of interferon response cGAMP interactor 1 (STING1), mRNA. [Source:RefSeq mRNA;Acc:NM_001319879]
SNORA73	ENSCDRG00005009877	214.723	0.806543	0.27655	2.91644	0.00354049	0.142661	121.899	198.544	129.634	198.964	127.027	476.582	172.616	245.732	267.799	208.438	Small nucleolar RNA SNORA73 family [Source:RFAM;Acc:RF00045]
ZNF362	ENSCDRG00005021012	67.4197	-0.724103	0.248435	-2.91466	0.00356082	0.142661	55.4088	105.693	101.934	71.6053	80.587	58.458	48.0702	45.0015	67.3077	40.1314	zinc finger protein 362 [Source:HGNC Symbol;Acc:HGNC:18079]
CACNG4	ENSCDRG00005020420	115.866	-0.566246	0.1943	-2.91429	0.00356501	0.142661	121.899	155.082	167.305	125.173	124.295	99.0814	67.7352	116.649	90.937	90.5005	calcium voltage-gated channel auxiliary subunit gamma 4 [Source:HGNC Symbol;Acc:HGNC:1408]
ENSCDRG00005019285	ENSCDRG00005019285	1734.87	0.697891	0.239698	2.91155	0.00359642	0.143569	1041.69	874.186	1345.09	1603.74	1742.87	1488.2	2145.68	2581.67	1513.71	3011.91	nan
FAP	ENSCDRG00005003579	16.5578	-1.77612	0.610328	-2.91011	0.00361304	0.143883	55.4088	23.7067	35.4553	6.55926	8.87823	2.97244	10.925	8.88188	7.87644	4.91405	fibroblast activation protein alpha [Source:NCBI gene;Acc:105093687]
KCNA4	ENSCDRG00005020142	67.4631	-0.787832	0.271059	-2.9065	0.00365498	0.144852	83.1132	53.3402	90.8543	119.16	81.9529	42.605	37.1451	64.5417	57.2832	44.636	potassium voltage-gated channel subfamily A member 4 [Source:HGNC Symbol;Acc:HGNC:6222]
FNDC3A	ENSCDRG00005005830	597.608	0.602107	0.207119	2.90705	0.00364853	0.144852	315.83	423.758	427.68	615.477	576.402	643.038	572.472	871.609	604.337	925.48	fibronectin type III domain containing 3A [Source:NCBI gene;Acc:105101936]
PCOLCE2	ENSCDRG00005011354	8.41917	-1.70433	0.587006	-2.90343	0.00369102	0.144948	16.6226	15.8045	9.97181	13.1185	10.9271	1.98163	0	5.32913	7.1604	3.27604	procollagen C-endopeptidase enhancer 2 [Source:HGNC Symbol;Acc:HGNC:8739]
TMPRSS11F	ENSCDRG00005017352	6.80073	-3.70202	1.27487	-2.90385	0.00368607	0.144948	44.327	7.90225	7.75585	0	4.09765	0	0	1.77638	2.14812	0	transmembrane serine protease 11F [Source:NCBI gene;Acc:105101508]
MBNL3	ENSCDRG00005013555	13.7701	1.5016	0.516883	2.9051	0.00367134	0.144948	11.0818	10.8656	3.32394	9.29229	2.73176	19.8163	28.4051	11.2504	20.0491	20.8847	muscleblind like splicing regulator 3 [Source:NCBI gene;Acc:105102209]
STAC2	ENSCDRG00005003841	83.4071	0.928172	0.319697	2.90329	0.00369267	0.144948	72.0314	47.4135	68.6947	48.6478	51.2206	78.2743	209.761	95.3322	98.8135	63.8827	SH3 and cysteine rich domain 2 [Source:HGNC Symbol;Acc:HGNC:23990]
TDRD5	ENSCDRG00005009924	9.25837	-2.23135	0.768932	-2.90189	0.00370925	0.145252	38.7861	8.89003	18.8356	2.73303	8.19529	1.98163	4.37001	2.96063	5.01228	0.819009	tudor domain containing 5 [Source:NCBI gene;Acc:105099979]
ENSCDRG00005008900	ENSCDRG00005008900	313.097	0.461563	0.159121	2.9007	0.00372332	0.145457	299.207	274.603	247.079	247.612	254.737	471.627	373.636	299.023	315.773	347.669	nan
TLR4	ENSCDRG00005012955	92.1268	0.910828	0.314093	2.89987	0.00373322	0.145498	88.6541	71.1202	35.4553	78.7111	52.5865	185.282	69.9202	82.8976	143.208	113.433	toll like receptor 4 [Source:HGNC Symbol;Acc:HGNC:11850]
WNT3A	ENSCDRG00005007136	14.4102	-2.30211	0.795172	-2.89511	0.00379027	0.145731	83.1132	13.8289	14.4037	7.65247	4.09765	8.91733	0	2.3685	6.44436	3.27604	Wnt family member 3A [Source:HGNC Symbol;Acc:HGNC:15983]
ALOX5AP	ENSCDRG00005005116	44.1463	1.10793	0.382809	2.8942	0.00380122	0.145731	16.6226	32.5968	34.3474	28.4235	23.9029	121.87	52.4402	36.7118	57.2832	37.2649	arachidonate 5-lipoxygenase activating protein [Source:NCBI gene;Acc:105086596]
DAB1	ENSCDRG00005013804	94.8287	-0.546034	0.188502	-2.89671	0.00377102	0.145731	155.145	96.8026	97.5022	120.253	99.7094	72.3294	87.4003	73.4236	74.4681	71.2538	DAB adaptor protein 1 [Source:NCBI gene;Acc:105092813]
BCL11A	ENSCDRG00005003770	31.1652	-1.00758	0.347841	-2.89666	0.00377157	0.145731	44.327	36.5479	42.1032	33.3429	49.8547	10.899	32.7751	27.8299	20.0491	13.9232	BAF chromatin remodeling complex subunit BCL11A [Source:HGNC Symbol;Acc:HGNC:13221]
FGF11	ENSCDRG00005007445	39.461	-0.880266	0.303883	-2.89672	0.00377082	0.145731	55.4088	41.4868	76.4506	38.809	45.757	28.7336	26.2201	28.422	19.3331	33.9889	fibroblast growth factor 11 [Source:HGNC Symbol;Acc:HGNC:3667]
ENSCDRG00005016148	ENSCDRG00005016148	13.428	-2.40086	0.829474	-2.89443	0.00379846	0.145731	55.4088	16.7923	31.0234	1.63982	10.2441	3.96326	0	6.51338	7.87644	0.819009	nan
B4GALT6	ENSCDRG00005015481	293.648	0.716572	0.247582	2.89429	0.00380022	0.145731	149.604	275.591	177.277	282.048	214.443	597.461	343.046	275.338	312.909	308.766	beta-1,4-galactosyltransferase 6 [Source:NCBI gene;Acc:105086692]
MGAT4C	ENSCDRG00005005093	21.4148	-1.69031	0.584213	-2.8933	0.00381213	0.145809	33.2453	27.6579	23.2676	59.58	22.5371	1.98163	0	13.0268	13.6048	19.2467	MGAT4 family member C [Source:NCBI gene;Acc:105084877]
CACNA1I	ENSCDRG00005014553	151.753	-0.661274	0.228805	-2.89012	0.00385096	0.146221	254.88	158.045	240.431	126.266	155.711	128.806	146.395	108.359	96.6653	101.967	calcium voltage-gated channel subunit alpha1 I [Source:HGNC Symbol;Acc:HGNC:1396]
JAG1	ENSCDRG00005006331	213.753	0.560552	0.193996	2.88951	0.00385846	0.146221	105.277	171.874	161.765	174.367	231.517	254.639	297.161	200.731	289.996	250.207	jagged canonical Notch ligand 1 [Source:HGNC Symbol;Acc:HGNC:6188]
SYT2	ENSCDRG00005019736	30.4339	-1.53087	0.529743	-2.88983	0.00385444	0.146221	121.899	45.4379	18.8356	21.3176	23.9029	5.94488	17.4801	19.5401	19.3331	10.6471	synaptotagmin 2 [Source:NCBI gene;Acc:105105940]
ACKR1	ENSCDRG00005010530	47.4733	1.08326	0.374843	2.88989	0.00385371	0.146221	22.1635	37.5357	27.6995	24.0506	37.5618	97.0998	63.3652	30.1984	94.5172	40.5409	atypical chemokine receptor 1 (Duffy blood group) [Source:HGNC Symbol;Acc:HGNC:4035]
ENSCDRG00005008075	ENSCDRG00005008075	20.7229	-2.61182	0.904261	-2.88835	0.0038727	0.146424	127.44	15.8045	31.0234	0.546605	4.78059	3.96326	6.55502	4.737	10.7406	1.63802	nan
NT5DC3	ENSCDRG00005007213	193.289	-0.696188	0.241161	-2.88681	0.00389164	0.146802	144.063	197.556	281.427	288.061	278.64	90.1641	131.1	178.23	156.097	187.553	5'-nucleotidase domain containing 3 [Source:HGNC Symbol;Acc:HGNC:30826]
ENSCDRG00005018076	ENSCDRG00005018076	22.7155	1.3919	0.482321	2.88584	0.00390366	0.146919	16.6226	18.7678	4.43192	8.74568	14.3418	39.6326	61.1802	22.5008	22.9133	18.0182	nan
SPEF2	ENSCDRG00005001102	37.297	-1.18737	0.411819	-2.88324	0.00393612	0.147802	88.6541	50.3768	69.8027	20.771	31.4153	21.7979	34.9601	18.3559	22.9133	13.9232	sperm flagellar 2 [Source:HGNC Symbol;Acc:HGNC:26293]
ENSCDRG00005019175	ENSCDRG00005019175	23.6335	-2.00472	0.69636	-2.87886	0.00399121	0.14953	116.358	21.7312	37.6713	9.29229	8.19529	5.94488	4.37001	13.0268	16.4689	3.27604	low-density lipoprotein receptor-related protein 2-like [Source:NCBI gene;Acc:105102390]
ETV1	ENSCDRG00005004851	85.3366	-0.730732	0.254092	-2.87585	0.00402937	0.150587	177.308	77.0469	90.8543	108.774	91.5141	44.5866	52.4402	62.7653	75.1842	72.8918	ETS variant transcription factor 1 [Source:HGNC Symbol;Acc:HGNC:3490]
PDE1B	ENSCDRG00005010791	165.329	-0.726281	0.252602	-2.8752	0.00403775	0.150587	310.289	130.387	211.624	213.723	172.784	80.2559	150.765	155.137	98.0974	130.222	phosphodiesterase 1B [Source:NCBI gene;Acc:105100999]
KCND3	ENSCDRG00005000784	175.201	-0.729463	0.253802	-2.87414	0.00405129	0.15075	188.39	148.167	279.211	262.917	213.078	69.357	131.1	168.756	146.072	144.965	potassium voltage-gated channel subfamily D member 3 [Source:NCBI gene;Acc:105102035]
ENSCDRG00005006357	ENSCDRG00005006357	11.5222	-2.74495	0.955347	-2.87325	0.00406276	0.150836	66.4905	6.91447	16.6197	1.63982	10.9271	0	0	7.10551	4.29624	1.22851	nan
DGKK	ENSCDRG00005019917	11.5677	-1.88943	0.658464	-2.86945	0.00411186	0.151725	33.2453	9.87781	17.7277	25.6904	7.51235	1.98163	0	11.2504	4.29624	4.09505	diacylglycerol kinase kappa [Source:HGNC Symbol;Acc:HGNC:32395]
ENSCDRG00005002145	ENSCDRG00005002145	34.737	0.999086	0.348178	2.86947	0.0041116	0.151725	16.6226	28.6457	12.1878	32.7963	22.5371	58.458	34.9601	31.9748	57.9992	51.1881	CD302 molecule [Source:NCBI gene;Acc:105093696]
PRKCZ	ENSCDRG00005011558	277.978	-0.676052	0.235619	-2.86926	0.00411438	0.151725	371.239	297.322	329.07	384.81	323.714	129.797	323.381	266.456	149.652	204.343	protein kinase C zeta [Source:HGNC Symbol;Acc:HGNC:9412]
FKBP5	ENSCDRG00005009952	150.745	0.812035	0.283139	2.86797	0.00413111	0.152001	94.1949	97.7903	154.009	77.6179	119.515	205.099	255.646	88.8188	202.639	212.123	FKBP prolyl isomerase 5 [Source:NCBI gene;Acc:105101346]
RTN4RL1	ENSCDRG00005009811	19.987	-1.54964	0.540616	-2.86643	0.00415132	0.152006	22.1635	32.5968	58.7229	24.5972	8.19529	4.95407	21.8501	8.88188	9.30851	8.59959	reticulon 4 receptor like 1 [Source:NCBI gene;Acc:105088237]
ARMC12	ENSCDRG00005010107	24.3293	1.10936	0.38695	2.86694	0.00414458	0.152006	0	25.6823	22.1596	10.9321	12.9759	34.6785	32.7751	30.1984	30.0737	43.817	armadillo repeat containing 12 [Source:HGNC Symbol;Acc:HGNC:21099]
ASTN1	ENSCDRG00005007343	633.742	-0.521708	0.182043	-2.86584	0.00415899	0.152006	1025.06	581.803	755.642	686.536	697.283	403.261	679.537	535.281	455.401	517.614	astrotactin 1 [Source:HGNC Symbol;Acc:HGNC:773]
TCAF1	ENSCDRG00005007762	1099.39	-0.383673	0.133994	-2.86336	0.00419175	0.152864	1246.7	1119.16	1211.02	1387.28	1261.39	777.789	948.293	1137.47	855.667	1049.15	TRPM8 channel associated factor 1 [Source:NCBI gene;Acc:105105467]
LAMP2	ENSCDRG00005014050	519.147	0.649829	0.22715	2.86079	0.00422588	0.153768	304.748	366.467	361.201	472.813	509.474	609.351	338.676	715.88	679.522	833.342	lysosomal associated membrane protein 2 [Source:NCBI gene;Acc:105098892]
TRIM10	ENSCDRG00005010772	17.5429	-1.88769	0.660433	-2.85827	0.00425961	0.154653	88.6541	17.7801	17.7277	7.10587	10.9271	3.96326	6.55502	8.28976	10.7406	3.68554	tripartite motif containing 10 [Source:HGNC Symbol;Acc:HGNC:10072]
CYBRD1	ENSCDRG00005000465	90.423	0.889529	0.311411	2.85645	0.00428413	0.154882	22.1635	82.9736	53.183	84.7238	64.8794	155.558	52.4402	123.162	132.467	132.679	cytochrome b reductase 1 [Source:NCBI gene;Acc:105091088]
ENSCDRG00005018040	ENSCDRG00005018040	88.3135	0.598223	0.209433	2.8564	0.00428476	0.154882	33.2453	76.0591	89.7463	66.1392	75.8064	105.026	93.9553	126.715	100.962	115.48	ribonuclease K [Source:NCBI gene;Acc:105103058]
PTCH1	ENSCDRG00005018352	306.77	-0.414965	0.145345	-2.85504	0.00430313	0.155205	365.698	313.127	322.422	396.835	352.398	213.025	305.901	243.956	285.7	268.635	patched 1 [Source:HGNC Symbol;Acc:HGNC:9585]
UMOD	ENSCDRG00005019075	10.2988	-2.38178	0.834735	-2.85334	0.0043262	0.155696	44.327	13.8289	15.5117	2.73303	8.87823	1.98163	10.925	2.96063	1.43208	0.409505	uromodulin [Source:HGNC Symbol;Acc:HGNC:12559]
SNCB	ENSCDRG00005012042	187.703	-0.886928	0.311066	-2.85125	0.00435476	0.156382	326.912	203.483	223.812	226.294	234.249	64.4029	273.126	109.543	103.826	111.385	synuclein beta [Source:NCBI gene;Acc:105099576]
ENSCDRG00005008282	ENSCDRG00005008282	5.53531	-2.54838	0.894231	-2.8498	0.00437462	0.156605	0	20.7434	15.5117	2.18642	8.87823	1.98163	0	2.3685	2.86416	0.819009	nan
ENSCDRG00005015642	ENSCDRG00005015642	866.38	0.535187	0.187824	2.84941	0.00438002	0.156605	648.283	573.901	736.806	796.95	773.089	796.614	1311	1115.56	717.472	1194.12	nodal modulator 1 [Source:NCBI gene;Acc:105091150]
PIK3CD	ENSCDRG00005012267	91.8679	0.852659	0.299563	2.84634	0.00442248	0.15778	33.2453	80.0103	87.5304	49.1945	68.2941	182.31	139.84	76.9763	115.282	85.9959	phosphatidylinositol-4,5-bisphosphate 3-kinase catalytic subunit delta [Source:HGNC Symbol;Acc:HGNC:8977]
ORC1	ENSCDRG00005006434	14.8581	-1.95917	0.688925	-2.8438	0.00445786	0.158698	60.9497	16.7923	26.5915	8.74568	8.87823	4.95407	0	8.88188	10.7406	2.04752	origin recognition complex subunit 1 [Source:NCBI gene;Acc:105092965]
SLA	ENSCDRG00005006863	89.1374	1.04442	0.367449	2.84234	0.00447831	0.159082	55.4088	75.0714	38.7793	56.3003	63.5135	247.704	126.73	61.5811	90.937	75.3488	Src like adaptor [Source:NCBI gene;Acc:105096458]
MYO1E	ENSCDRG00005010981	227.985	0.59977	0.211103	2.84113	0.00449535	0.159343	149.604	245.958	148.469	162.342	189.858	322.015	356.156	200.138	270.663	234.646	myosin IE [Source:NCBI gene;Acc:105088970]
ADAM18	ENSCDRG00005009541	8.13087	-3.26416	1.14927	-2.84022	0.00450828	0.159458	33.2453	23.7067	16.6197	1.09321	0	0	0	2.96063	2.86416	0.819009	ADAM metallopeptidase domain 18 [Source:HGNC Symbol;Acc:HGNC:196]
TUBA4A	ENSCDRG00005000805	255.936	-0.747889	0.263708	-2.83605	0.00456758	0.161137	249.34	266.701	233.784	485.385	364.69	107.008	201.021	253.43	171.133	226.866	tubulin alpha 4a [Source:NCBI gene;Acc:105096109]
INPP5B	ENSCDRG00005010217	130.731	0.509055	0.179529	2.8355	0.00457537	0.161137	116.358	116.558	79.7745	118.067	111.319	169.429	135.47	132.044	166.121	162.164	inositol polyphosphate-5-phosphatase B [Source:HGNC Symbol;Acc:HGNC:6077]
ADAD1	ENSCDRG00005002907	17.4534	-1.68877	0.596735	-2.83002	0.00465452	0.162533	60.9497	12.8412	43.2112	9.83889	10.2441	3.96326	6.55502	10.6583	6.44436	9.82811	adenosine deaminase domain containing 1 [Source:NCBI gene;Acc:105093663]
TSHR	ENSCDRG00005002889	10.2539	-2.07907	0.734605	-2.83019	0.00465203	0.162533	11.0818	6.91447	42.1032	3.27963	19.1223	2.97244	4.37001	5.32913	5.72832	1.63802	thyroid stimulating hormone receptor [Source:HGNC Symbol;Acc:HGNC:12373]
ENSCDRG00005019772	ENSCDRG00005019772	9.94811	1.44682	0.510902	2.8319	0.00462729	0.162533	5.54088	2.96334	6.64788	7.10587	4.09765	16.8438	17.4801	10.6583	12.1727	15.9707	nan
ENSCDRG00005018075	ENSCDRG00005018075	386.686	-0.701583	0.247817	-2.83106	0.00463945	0.162533	498.679	337.821	436.544	720.972	401.569	199.154	299.346	430.475	229.849	312.452	neurofilament medium [Source:NCBI gene;Acc:105102423]
ENSCDRG00005016775	ENSCDRG00005016775	6.71575	2.19204	0.775406	2.82696	0.00469915	0.163406	0	4.93891	0	3.27963	2.04882	16.8438	13.11	15.9874	6.44436	4.50455	nan
LRP4	ENSCDRG00005008476	1128.84	0.467658	0.165468	2.82627	0.00470933	0.163406	736.937	1062.85	1115.74	922.669	882.36	1730.95	1330.67	1033.85	1243.04	1229.33	LDL receptor related protein 4 [Source:HGNC Symbol;Acc:HGNC:6696]
PRKCE	ENSCDRG00005022256	240.983	-0.54842	0.194037	-2.82637	0.00470785	0.163406	299.207	245.958	273.671	355.84	258.152	132.769	209.761	233.297	171.85	229.323	protein kinase C epsilon [Source:NCBI gene;Acc:105103566]
BPIFB2	ENSCDRG00005009158	7.77563	-3.57742	1.26671	-2.82419	0.00474002	0.164124	55.4088	2.96334	13.2958	0	1.36588	0	0	2.3685	0.71604	1.63802	BPI fold containing family B member 2 [Source:HGNC Symbol;Acc:HGNC:16177]
DNAJB9	ENSCDRG00005000639	97.8431	0.968842	0.343368	2.82159	0.00477869	0.16477	22.1635	54.328	54.291	95.6559	94.9288	121.87	83.0303	177.046	83.0606	192.058	DnaJ heat shock protein family (Hsp40) member B9 [Source:NCBI gene;Acc:105085299]
ENSCDRG00005006816	ENSCDRG00005006816	7.7348	-2.16781	0.768211	-2.8219	0.00477407	0.16477	22.1635	2.96334	26.5915	4.37284	8.19529	1.98163	2.18501	2.96063	4.29624	1.63802	nan
ENSCDRG00005006457	ENSCDRG00005006457	9.09673	-2.09818	0.74394	-2.82037	0.0047969	0.165051	33.2453	10.8656	18.8356	1.63982	11.61	4.95407	0	2.96063	3.5802	3.27604	nan
ENSCDRG00005013949	ENSCDRG00005013949	9.0021	-1.94869	0.692205	-2.8152	0.00487474	0.16738	22.1635	12.8412	22.1596	10.9321	5.46353	4.95407	0	7.10551	0.71604	3.68554	nan
ALOX15	ENSCDRG00005017756	22.3077	-1.40233	0.498409	-2.81361	0.00489884	0.167857	60.9497	25.6823	44.3192	12.0253	21.1712	4.95407	17.4801	14.8031	14.3208	7.37108	arachidonate 15-lipoxygenase [Source:NCBI gene;Acc:105106001]
FAM81A	ENSCDRG00005010891	12.5979	-1.39404	0.495709	-2.81221	0.00492028	0.168241	27.7044	20.7434	18.8356	18.5846	8.87823	4.95407	2.18501	7.10551	7.1604	9.82811	family with sequence similarity 81 member A [Source:NCBI gene;Acc:105088971]
CKM	ENSCDRG00005007135	6.74723	-2.86828	1.02113	-2.80894	0.0049705	0.169605	44.327	7.90225	4.43192	1.63982	2.73176	1.98163	0	1.18425	2.86416	0.409505	creatine kinase, M-type [Source:HGNC Symbol;Acc:HGNC:1994]
ENSCDRG00005012520	ENSCDRG00005012520	112.187	0.780516	0.277941	2.80821	0.0049818	0.169639	99.7358	72.108	90.8543	66.6858	83.3188	133.76	255.646	114.28	108.838	96.6431	CACN subunit beta associated regulatory protein [Source:HGNC Symbol;Acc:HGNC:28617]
ENSCDRG00005001865	ENSCDRG00005001865	285.706	0.951213	0.339109	2.80504	0.00503104	0.170609	83.1132	238.055	132.958	263.464	243.81	744.101	325.566	285.997	297.156	242.836	nan
FOXO6	ENSCDRG00005015434	67.579	-0.966611	0.344565	-2.80531	0.00502683	0.170609	171.767	45.4379	78.6665	85.2704	73.7576	25.7612	50.2552	61.5811	50.1228	33.1699	forkhead box O6 [Source:HGNC Symbol;Acc:HGNC:24814]
PIK3AP1	ENSCDRG00005008820	85.429	1.01057	0.360617	2.80233	0.00507357	0.171698	33.2453	88.9003	43.2112	60.6732	51.9035	233.832	76.4752	88.8188	103.11	74.1203	phosphoinositide-3-kinase adaptor protein 1 [Source:HGNC Symbol;Acc:HGNC:30034]
ENSCDRG00005007037	ENSCDRG00005007037	7.72807	-3.36956	1.20314	-2.80065	0.0051	0.172238	27.7044	5.92669	35.4553	0	2.04882	2.97244	0	0	0.71604	2.45703	nan
VAV1	ENSCDRG00005017664	75.9512	0.942319	0.3366	2.79952	0.00511786	0.172282	60.9497	73.0958	39.8873	50.2877	38.2447	182.31	78.6603	58.0283	103.11	74.9393	vav guanine nucleotide exchange factor 1 [Source:HGNC Symbol;Acc:HGNC:12657]
CELF4	ENSCDRG00005004033	151.177	-0.570803	0.203913	-2.79924	0.00512228	0.172282	205.013	134.338	198.328	198.964	174.833	117.907	91.7703	149.808	96.6653	144.146	CUGBP Elav-like family member 4 [Source:HGNC Symbol;Acc:HGNC:14015]
C6	ENSCDRG00005015939	14.9592	-2.50374	0.896731	-2.79207	0.00523712	0.175609	66.4905	13.8289	38.7793	1.63982	8.87823	0	0	7.69763	8.59248	3.68554	complement C6 [Source:HGNC Symbol;Acc:HGNC:1339]
SLC35A1	ENSCDRG00005018355	95.6405	0.944587	0.338407	2.79128	0.00525005	0.175609	16.6226	78.0347	37.6713	101.122	81.9529	182.31	78.6603	117.241	134.615	128.175	solute carrier family 35 member A1 [Source:HGNC Symbol;Acc:HGNC:11021]
ETS1	ENSCDRG00005018815	107.825	0.566189	0.202856	2.79108	0.00525321	0.175609	72.0314	80.0103	87.5304	93.4695	92.88	149.613	159.506	91.7795	131.035	120.394	ETS proto-oncogene 1, transcription factor [Source:NCBI gene;Acc:105094269]
ENSCDRG00005009272	ENSCDRG00005009272	6.49023	-2.20035	0.788746	-2.78968	0.00527594	0.176011	22.1635	11.8534	9.97181	3.82624	6.82941	5.94488	0	2.3685	0.71604	1.22851	nan
ENSCDRG00005016493	ENSCDRG00005016493	19.9488	1.70893	0.612838	2.78855	0.0052945	0.176272	16.6226	11.8534	12.1878	3.27963	5.46353	44.5866	63.3652	11.8425	20.0491	10.2376	nan
H2BU1	ENSCDRG00005006528	38.3307	-1.03574	0.372067	-2.78376	0.00537327	0.176349	44.327	35.5601	48.7511	84.1772	46.44	14.8622	15.295	31.9748	22.1972	39.7219	histone H2B type 3-B [Source:NCBI gene;Acc:105094139]
ENSCDRG00005002831	ENSCDRG00005002831	514.698	0.654758	0.235308	2.78255	0.0053933	0.176349	398.943	457.343	448.732	299.54	392.691	954.154	766.937	389.026	507.672	531.946	nan
CAMK2B	ENSCDRG00005003656	469.839	-0.510158	0.183283	-2.78345	0.00537843	0.176349	592.874	446.477	628.224	590.88	500.596	275.446	504.737	421.593	318.638	418.923	calcium/calmodulin dependent protein kinase II beta [Source:HGNC Symbol;Acc:HGNC:1461]
CNN3	ENSCDRG00005001443	251.982	0.5795	0.208262	2.78255	0.00539328	0.176349	155.145	196.568	167.305	224.108	260.883	322.015	183.541	348.17	347.995	314.09	calponin 3 [Source:NCBI gene;Acc:105085189]
SCYL1	ENSCDRG00005008708	199.898	0.441126	0.15852	2.78278	0.00538954	0.176349	171.767	147.179	173.953	159.609	191.223	224.915	286.236	232.705	191.899	219.494	SCY1 like pseudokinase 1 [Source:HGNC Symbol;Acc:HGNC:14372]
SLC2A1	ENSCDRG00005006838	359.736	0.435111	0.156229	2.78509	0.00535127	0.176349	277.044	303.249	288.075	303.912	350.349	493.425	386.746	322.708	478.314	393.534	solute carrier family 2 member 1 [Source:NCBI gene;Acc:105090921]
HDAC11	ENSCDRG00005004608	170.597	-0.536544	0.192565	-2.7863	0.00533131	0.176349	249.34	179.776	210.516	190.765	178.931	122.861	205.391	133.228	113.134	122.032	histone deacetylase 11 [Source:NCBI gene;Acc:105093074]
OR10T2	ENSCDRG00005008851	6.41437	-3.13133	1.12403	-2.7858	0.00533957	0.176349	33.2453	2.96334	19.9436	0.546605	2.04882	1.98163	0	1.77638	0	1.63802	olfactory receptor 10T2 [Source:NCBI gene;Acc:105086510]
MINAR1	ENSCDRG00005017997	47.8728	-0.628941	0.225831	-2.78501	0.00535269	0.176349	60.9497	53.3402	58.7229	67.2324	51.9035	39.6326	32.7751	39.6724	37.2341	37.2649	membrane integral NOTCH2 associated receptor 1 [Source:NCBI gene;Acc:105092238]
PCDH18	ENSCDRG00005001630	41.5658	-0.862133	0.310705	-2.77476	0.00552424	0.180272	55.4088	33.5846	59.8309	73.7917	46.44	17.8347	28.4051	36.7118	32.9378	30.7128	protocadherin 18 [Source:HGNC Symbol;Acc:HGNC:14268]
CPA4	ENSCDRG00005000947	13.0806	2.10472	0.759116	2.7726	0.00556109	0.181115	5.54088	13.8289	4.43192	1.63982	0	36.6601	28.4051	8.88188	15.0368	16.3802	carboxypeptidase A4 [Source:NCBI gene;Acc:105085387]
SLC10A2	ENSCDRG00005003977	5.91671	-2.89445	1.0443	-2.77166	0.00557716	0.18128	16.6226	19.7556	11.0798	0	4.78059	0	2.18501	1.77638	2.14812	0.819009	solute carrier family 10 member 2 [Source:NCBI gene;Acc:105094091]
GARS1	ENSCDRG00005002379	208.09	0.598053	0.215836	2.77087	0.00559068	0.181361	132.981	153.106	142.929	196.231	198.053	193.209	183.541	342.249	244.17	294.434	glycyl-tRNA synthetase 1 [Source:HGNC Symbol;Acc:HGNC:4162]
ENSCDRG00005002924	ENSCDRG00005002924	44.2732	-0.774408	0.279614	-2.76956	0.00561318	0.181732	55.4088	52.3524	77.5585	43.7284	52.5865	23.7795	30.5901	39.0803	27.9255	39.7219	nan
FSTL5	ENSCDRG00005010192	62.8927	-1.38491	0.501167	-2.76337	0.00572085	0.182347	121.899	46.4257	36.5633	63.4062	187.809	6.9357	39.3301	28.422	52.2709	45.8645	follistatin like 5 [Source:NCBI gene;Acc:105094768]
IRS4	ENSCDRG00005016572	71.756	-1.34727	0.486958	-2.76671	0.00566259	0.182347	72.0314	52.3524	67.5867	178.193	146.832	27.7428	8.74003	24.2771	50.1228	89.6815	insulin receptor substrate 4 [Source:HGNC Symbol;Acc:HGNC:6128]
CLK1	ENSCDRG00005007272	211.779	0.804197	0.290888	2.76463	0.0056988	0.182347	60.9497	167.923	126.31	211.536	191.906	323.996	142.025	236.85	297.156	359.135	CDC like kinase 1 [Source:NCBI gene;Acc:105099172]
FBXO2	ENSCDRG00005016815	89.669	0.806917	0.291621	2.76701	0.00565735	0.182347	88.6541	55.3157	53.183	54.1139	77.1723	109.98	190.096	86.4503	114.566	67.1587	F-box protein 2 [Source:NCBI gene;Acc:105107028]
U1	ENSCDRG00005008690	6.83173	-1.82659	0.660468	-2.76561	0.0056817	0.182347	11.0818	9.87781	18.8356	6.55926	6.82941	0.990814	4.37001	4.14488	3.5802	2.04752	U1 spliceosomal RNA [Source:RFAM;Acc:RF00003]
PAK5	ENSCDRG00005006805	48.6219	-0.877764	0.317634	-2.76344	0.00571956	0.182347	94.1949	44.4502	73.1266	50.8343	61.4647	29.7244	13.11	47.37	32.2218	39.7219	p21 (RAC1) activated kinase 5 [Source:NCBI gene;Acc:105101260]
MAST3	ENSCDRG00005012259	371.298	-0.405135	0.146487	-2.76568	0.00568043	0.182347	465.434	481.049	424.356	348.187	397.472	288.327	395.486	300.8	292.86	319.004	microtubule associated serine/threonine kinase 3 [Source:HGNC Symbol;Acc:HGNC:19036]
ARHGDIB	ENSCDRG00005014617	90.4875	0.932802	0.337462	2.76417	0.00570682	0.182347	44.327	90.8759	49.8591	57.3935	63.5135	224.915	115.805	71.6472	112.418	74.1203	Rho GDP dissociation inhibitor beta [Source:HGNC Symbol;Acc:HGNC:679]
APBB2	ENSCDRG00005009106	208.411	0.675882	0.24478	2.76118	0.00575932	0.182864	83.1132	204.471	119.662	163.435	219.224	294.272	172.616	236.85	290.712	299.757	amyloid beta precursor protein binding family B member 2 [Source:NCBI gene;Acc:105089326]
DZANK1	ENSCDRG00005003737	460.556	-0.401719	0.145458	-2.76175	0.00574923	0.182864	570.71	429.685	583.905	542.779	501.962	317.06	399.856	433.436	377.353	448.817	double zinc ribbon and ankyrin repeat domains 1 [Source:NCBI gene;Acc:105094130]
CST3	ENSCDRG00005019511	592.97	0.749823	0.272068	2.75601	0.0058511	0.18542	482.056	559.084	279.211	501.783	390.642	1330.66	638.022	527.584	712.459	508.195	cystatin C [Source:HGNC Symbol;Acc:HGNC:2475]
BCAR3	ENSCDRG00005002103	81.4606	0.628461	0.228195	2.75405	0.00588627	0.185818	83.1132	71.1202	65.3708	52.4741	54.6353	134.751	96.1403	84.6739	88.7889	83.5389	BCAR3 adaptor protein, NSP family member [Source:HGNC Symbol;Acc:HGNC:973]
NXN	ENSCDRG00005013864	41.3715	-0.73282	0.266057	-2.75438	0.00588041	0.185818	83.1132	45.4379	50.967	42.6352	44.3912	33.6877	24.0351	30.1984	32.2218	27.0273	nucleoredoxin [Source:HGNC Symbol;Acc:HGNC:18008]
CYP17A1	ENSCDRG00005013042	16.4178	-2.15515	0.783305	-2.75136	0.00593489	0.186995	77.5723	19.7556	28.8075	4.91945	5.46353	2.97244	4.37001	9.47401	10.0246	0.819009	steroid 17-alpha-hydroxylase/17,20 lyase [Source:NCBI gene;Acc:105095024]
MCTP1	ENSCDRG00005012739	43.7422	-1.18051	0.429795	-2.74668	0.00602016	0.189068	33.2453	58.2791	54.291	119.707	33.4641	11.8898	43.7001	17.7638	34.3699	30.7128	multiple C2 and transmembrane domain containing 1 [Source:NCBI gene;Acc:105095500]
MYL9	ENSCDRG00005017310	81.1777	-0.975492	0.355178	-2.74649	0.00602371	0.189068	94.1949	105.693	65.3708	84.1772	189.175	28.7336	41.5151	49.7385	93.8012	59.3782	myosin light chain 9 [Source:NCBI gene;Acc:105084979]
SLFN14	ENSCDRG00005012497	6.0721	-2.4468	0.892548	-2.74137	0.00611841	0.191675	16.6226	5.92669	24.3755	2.18642	3.4147	1.98163	0	3.55275	1.43208	1.22851	schlafen family member 14 [Source:NCBI gene;Acc:105097876]
GUCY2C	ENSCDRG00005012147	47.6414	-0.777027	0.283735	-2.73856	0.00617081	0.192949	72.0314	48.4013	62.0468	73.2451	49.8547	34.6785	24.0351	26.0535	36.518	49.55	guanylate cyclase 2C [Source:HGNC Symbol;Acc:HGNC:4688]
NGEF	ENSCDRG00005009051	68.9246	-0.636656	0.232584	-2.73732	0.00619415	0.193008	99.7358	79.0225	85.3144	88.55	66.2453	64.4029	69.9202	48.5543	37.9501	49.55	neuronal guanine nucleotide exchange factor [Source:NCBI gene;Acc:105105238]
ENSCDRG00005022096	ENSCDRG00005022096	7.74054	-2.53858	0.927432	-2.73722	0.00619616	0.193008	27.7044	16.7923	14.4037	1.63982	4.09765	0	8.74003	1.77638	1.43208	0.819009	nan
CCDC63	ENSCDRG00005010543	12.2993	-1.34118	0.490177	-2.73611	0.00621706	0.193293	33.2453	16.7923	16.6197	10.9321	12.9759	2.97244	8.74003	7.10551	7.87644	5.73306	coiled-coil domain containing 63 [Source:HGNC Symbol;Acc:HGNC:26669]
HLX	ENSCDRG00005018290	17.7	1.41593	0.5179	2.73398	0.00625735	0.193872	5.54088	10.8656	7.75585	11.4787	8.87823	25.7612	58.9952	10.0661	20.0491	17.6087	H2.0 like homeobox [Source:HGNC Symbol;Acc:HGNC:4978]
ENSCDRG00005016260	ENSCDRG00005016260	143.431	-0.504594	0.184571	-2.73388	0.00625925	0.193872	138.522	148.167	199.436	165.075	182.345	90.1641	144.21	137.373	118.863	110.157	nan
NLN	ENSCDRG00005005795	93.5275	-0.517036	0.189463	-2.72895	0.00635372	0.194962	105.277	86.9247	116.338	114.24	128.393	75.3019	65.5502	74.6078	88.7889	79.8534	neurolysin [Source:NCBI gene;Acc:105084753]
SFTPD	ENSCDRG00005006926	7.41449	-2.00808	0.735592	-2.72988	0.00633579	0.194962	16.6226	18.7678	16.6197	3.27963	5.46353	3.96326	0	2.3685	5.01228	2.04752	surfactant protein D [Source:NCBI gene;Acc:105092421]
MMP2	ENSCDRG00005001638	118.481	-0.594247	0.217598	-2.73094	0.00631534	0.194962	105.277	200.52	147.361	103.855	150.247	110.971	93.9553	82.8976	98.8135	90.91	matrix metallopeptidase 2 [Source:HGNC Symbol;Acc:HGNC:7166]
CCDC85A	ENSCDRG00005022445	74.4704	-0.681434	0.249661	-2.72944	0.00634426	0.194962	77.5723	91.8636	90.8543	96.2025	96.2947	53.504	80.8453	67.5023	31.5057	58.5591	coiled-coil domain containing 85A [Source:HGNC Symbol;Acc:HGNC:29400]
ENSCDRG00005006388	ENSCDRG00005006388	64.0645	-0.614603	0.225075	-2.73066	0.00632076	0.194962	88.6541	75.0714	65.3708	85.817	75.1235	46.5683	52.4402	54.4755	36.518	60.6067	nan
PLK3	ENSCDRG00005014024	46.5828	1.02361	0.37527	2.72765	0.00637872	0.195365	55.4088	30.6212	24.3755	22.4108	26.6347	53.504	115.805	37.3039	63.7275	36.0364	polo like kinase 3 [Source:NCBI gene;Acc:105090883]
HPGDS	ENSCDRG00005009472	42.3709	1.06577	0.392221	2.71727	0.00658234	0.197411	38.7861	32.5968	13.2958	38.2624	17.0735	86.2008	48.0702	37.896	75.9002	35.6269	hematopoietic prostaglandin D synthase [Source:NCBI gene;Acc:105089526]
SLC38A5	ENSCDRG00005016431	75.803	0.668346	0.24566	2.72061	0.00651606	0.197411	60.9497	70.1325	42.1032	71.0587	47.1229	105.026	107.065	64.5417	99.5295	90.5005	solute carrier family 38 member 5 [Source:NCBI gene;Acc:105105497]
LIFR	ENSCDRG00005017655	286.233	0.685963	0.252481	2.71689	0.00658985	0.197411	155.145	204.471	176.169	249.799	304.592	346.785	231.611	272.378	373.057	548.327	LIF receptor subunit alpha [Source:NCBI gene;Acc:105106812]
DGLUCY	ENSCDRG00005004876	106.64	-0.755201	0.277656	-2.71992	0.00652978	0.197411	199.472	101.741	122.986	112.601	144.101	54.4948	45.8851	87.6346	121.727	75.7583	D-glutamate cyclase [Source:HGNC Symbol;Acc:HGNC:20498]
ENSCDRG00005005255	ENSCDRG00005005255	57.2313	0.92564	0.340756	2.71643	0.00659909	0.197411	5.54088	60.2546	28.8075	43.1818	48.4888	101.063	80.8453	50.9228	59.4313	93.7765	nan
WDR91	ENSCDRG00005001954	175.719	0.457058	0.168224	2.71696	0.00658836	0.197411	121.899	148.167	160.657	136.651	163.906	252.658	216.316	168.164	186.886	201.886	WD repeat domain 91 [Source:HGNC Symbol;Acc:HGNC:24997]
EFEMP2	ENSCDRG00005018242	89.6794	0.567452	0.208879	2.71665	0.00659456	0.197411	66.4905	76.0591	66.4788	83.6306	65.5623	144.659	100.51	88.2267	105.258	99.9191	EGF containing fibulin extracellular matrix protein 2 [Source:NCBI gene;Acc:105102584]
ENSCDRG00005000425	ENSCDRG00005000425	6.96871	-2.50503	0.920023	-2.72279	0.00647337	0.197411	38.7861	6.91447	7.75585	1.09321	5.46353	0.990814	4.37001	2.3685	0.71604	1.22851	nan
PITPNM3	ENSCDRG00005011786	235.477	-0.567265	0.208787	-2.71696	0.00658851	0.197411	387.861	216.324	290.291	240.506	275.908	145.65	273.126	195.994	163.257	165.849	PITPNM family member 3 [Source:HGNC Symbol;Acc:HGNC:21043]
CCM2L	ENSCDRG00005016693	67.3343	0.666199	0.24526	2.7163	0.00660158	0.197411	66.4905	66.1813	46.5351	40.9954	45.757	105.026	80.8453	62.1732	73.7521	85.5864	CCM2 like scaffold protein [Source:HGNC Symbol;Acc:HGNC:16153]
PLIN1	ENSCDRG00005020709	9.07539	-2.27285	0.834902	-2.72229	0.00648309	0.197411	27.7044	7.90225	33.2394	3.27963	2.73176	1.98163	6.55502	2.96063	3.5802	0.819009	perilipin 1 [Source:HGNC Symbol;Acc:HGNC:9076]
ENSCDRG00005017649	ENSCDRG00005017649	183.921	0.886238	0.326246	2.71647	0.00659822	0.197411	49.8679	187.678	203.868	60.6732	133.856	315.079	222.871	184.151	250.614	230.551	proline dehydrogenase 1, mitochondrial [Source:NCBI gene;Acc:105095645]
ASTL	ENSCDRG00005019913	6.19494	-2.69273	0.990788	-2.71776	0.0065725	0.197411	27.7044	8.89003	13.2958	1.63982	3.4147	0.990814	0	0.592125	5.01228	0.409505	astacin like metalloendopeptidase [Source:NCBI gene;Acc:105093715]
SEC24D	ENSCDRG00005004247	99.534	0.633632	0.234227	2.70521	0.00682612	0.20001	72.0314	83.9614	62.0468	72.1519	100.392	139.705	74.2902	106.583	145.356	138.822	SEC24 homolog D, COPII coat complex component [Source:HGNC Symbol;Acc:HGNC:10706]
ENSCDRG00005001219	ENSCDRG00005001219	27.456	-0.956393	0.353119	-2.70842	0.00676051	0.20001	44.327	27.6579	39.8873	50.2877	21.1712	16.8438	15.295	15.3953	23.6293	20.0657	nan
ENSCDRG00005021451	ENSCDRG00005021451	6.11574	-3.08266	1.13872	-2.70713	0.00678673	0.20001	33.2453	1.97556	18.8356	1.09321	0.682941	0.990814	0	1.77638	2.14812	0.409505	nan
PAK1	ENSCDRG00005005198	157.476	-0.563348	0.208254	-2.7051	0.0068284	0.20001	188.39	156.069	178.385	236.133	185.077	107.999	91.7703	152.768	113.134	165.03	p21 (RAC1) activated kinase 1 [Source:HGNC Symbol;Acc:HGNC:8590]
PCSK5	ENSCDRG00005000104	40.2848	-0.870166	0.321266	-2.70855	0.00675777	0.20001	55.4088	55.3157	70.9107	35.5293	44.3912	22.7887	28.4051	20.7244	44.3945	24.9798	proprotein convertase subtilisin/kexin type 5 [Source:NCBI gene;Acc:105087403]
SMARCC2	ENSCDRG00005005840	538.259	-0.317762	0.117483	-2.70474	0.00683572	0.20001	576.251	607.485	676.975	576.122	541.572	502.343	537.512	470.148	459.697	434.484	SWI/SNF related, matrix associated, actin dependent regulator of chromatin subfamily c member 2 [Source:HGNC Symbol;Acc:HGNC:11105]
B4GALNT2	ENSCDRG00005016644	10.7076	-2.49243	0.921344	-2.70522	0.006826	0.20001	49.8679	19.7556	13.2958	0	8.87823	0.990814	4.37001	2.96063	5.72832	1.22851	beta-1,4-N-acetyl-galactosaminyltransferase 2 [Source:HGNC Symbol;Acc:HGNC:24136]
ENSCDRG00005021466	ENSCDRG00005021466	28.5378	1.87207	0.691249	2.70824	0.00676415	0.20001	38.7861	9.87781	5.5399	7.65247	8.19529	132.769	10.925	11.2504	24.3453	36.0364	nan
PYGO2	ENSCDRG00005003934	99.5774	-0.485873	0.179495	-2.7069	0.00679155	0.20001	94.1949	104.705	135.173	130.639	110.636	82.2376	87.4003	92.3716	74.4681	83.9484	pygopus family PHD finger 2 [Source:NCBI gene;Acc:105089028]
ENSCDRG00005014965	ENSCDRG00005014965	15.5628	1.49959	0.553663	2.70848	0.00675912	0.20001	0	9.87781	11.0798	7.65247	8.19529	42.605	24.0351	16.5795	28.6416	6.96158	nan
FURIN	ENSCDRG00005012204	121.127	0.609101	0.225241	2.70422	0.00684657	0.20001	49.8679	113.595	115.23	84.7238	101.758	167.448	176.986	126.715	166.837	108.109	furin, paired basic amino acid cleaving enzyme [Source:NCBI gene;Acc:105094698]
NFIX	ENSCDRG00005022174	327.276	-0.482492	0.17838	-2.70485	0.00683352	0.20001	360.157	464.257	427.68	291.34	359.91	347.776	292.791	234.482	258.49	235.875	nuclear factor I X [Source:NCBI gene;Acc:105100761]
RHOF	ENSCDRG00005019357	34.7071	-0.872067	0.322369	-2.70518	0.00682673	0.20001	49.8679	27.6579	56.5069	56.3003	36.8788	27.7428	15.295	31.3827	20.0491	25.3893	ras homolog family member F, filopodia associated [Source:NCBI gene;Acc:105102514]
KANK3	ENSCDRG00005011269	85.9066	0.794587	0.29399	2.70277	0.00687651	0.200528	88.6541	69.1447	44.3192	56.8469	59.4159	144.659	157.321	62.1732	79.4804	97.0526	KN motif and ankyrin repeat domains 3 [Source:HGNC Symbol;Acc:HGNC:24796]
CCDC80	ENSCDRG00005014833	166.039	0.52024	0.19254	2.70198	0.00689275	0.200646	110.818	136.314	148.469	151.41	133.173	216.988	120.175	203.099	204.071	235.875	coiled-coil domain containing 80 [Source:HGNC Symbol;Acc:HGNC:30649]
FGF1	ENSCDRG00005007630	184.046	-0.372953	0.138369	-2.69535	0.00703142	0.200871	216.094	208.422	210.516	196.778	212.395	167.448	144.21	159.874	145.356	179.363	fibroblast growth factor 1 [Source:HGNC Symbol;Acc:HGNC:3665]
TTC23L	ENSCDRG00005001796	26.0002	-1.02419	0.379783	-2.69677	0.0070015	0.200871	33.2453	27.6579	45.4271	39.3556	32.0982	14.8622	4.37001	23.685	14.3208	24.9798	tetratricopeptide repeat domain 23 like [Source:HGNC Symbol;Acc:HGNC:26355]
CFAP65	ENSCDRG00005000170	60.9558	-0.984795	0.365076	-2.69751	0.00698606	0.200871	149.604	78.0347	88.6383	36.6225	56.0012	34.6785	65.5502	43.2252	29.3576	27.8463	cilia and flagella associated protein 65 [Source:HGNC Symbol;Acc:HGNC:25325]
ENSCDRG00005006066	ENSCDRG00005006066	7.14316	-2.36563	0.8781	-2.69404	0.00705924	0.200871	33.2453	10.8656	11.0798	0.546605	5.46353	2.97244	2.18501	1.18425	1.43208	2.45703	troponin T1, slow skeletal type [Source:NCBI gene;Acc:105098735]
ENSCDRG00005005107	ENSCDRG00005005107	46.9648	0.686527	0.254665	2.6958	0.00702194	0.200871	16.6226	47.4135	44.3192	33.3429	30.7323	59.4488	67.7352	62.1732	52.9869	54.8736	nan
HROB	ENSCDRG00005014700	8.52476	-2.32134	0.860547	-2.69752	0.00698584	0.200871	44.327	6.91447	15.5117	2.18642	4.78059	1.98163	0	4.737	3.5802	1.22851	homologous recombination factor with OB-fold [Source:HGNC Symbol;Acc:HGNC:28460]
ENSCDRG00005006095	ENSCDRG00005006095	21.4758	-1.16856	0.433438	-2.69602	0.00701726	0.200871	49.8679	26.6701	42.1032	15.3049	19.1223	6.9357	10.925	13.0268	16.4689	14.3327	nan
BRIP1	ENSCDRG00005005651	22.0319	-0.973187	0.361167	-2.69456	0.0070482	0.200871	49.8679	31.609	25.4835	21.8642	21.8541	9.90814	15.295	15.9874	12.8887	15.5612	BRCA1 interacting protein C-terminal helicase 1 [Source:HGNC Symbol;Acc:HGNC:20473]
ETNK2	ENSCDRG00005016344	58.5535	-1.16974	0.434096	-2.69465	0.00704629	0.200871	199.472	54.328	68.6947	39.3556	51.2206	14.8622	45.8851	28.422	47.2586	36.0364	ethanolamine kinase 2 [Source:NCBI gene;Acc:105098651]
ENSCDRG00005010310	ENSCDRG00005010310	51.6293	0.944782	0.349868	2.70039	0.00692575	0.200871	55.4088	25.6823	34.3474	36.0759	32.0982	87.1916	41.5151	40.2645	111.702	52.0071	nan
RGMA	ENSCDRG00005020035	146.782	-0.536876	0.198916	-2.69901	0.00695462	0.200871	216.094	144.216	199.436	148.13	165.272	104.035	142.025	139.149	121.011	88.453	repulsive guidance molecule BMP co-receptor a [Source:HGNC Symbol;Acc:HGNC:30308]
CRACR2A	ENSCDRG00005022420	18.9878	-1.64067	0.608399	-2.69671	0.00700292	0.200871	66.4905	16.7923	33.2394	6.01266	21.8541	6.9357	19.6651	9.47401	5.72832	3.68554	calcium release activated channel regulator 2A [Source:NCBI gene;Acc:105091330]
ENSCDRG00005019388	ENSCDRG00005019388	43.7288	-1.18853	0.440952	-2.69538	0.00703086	0.200871	144.063	41.4868	63.1548	25.1438	36.1959	18.8255	34.9601	30.7905	27.9255	14.7422	nan
VPS39	ENSCDRG00005018443	296.468	-0.433444	0.160954	-2.69298	0.00708174	0.201163	304.748	283.493	377.821	402.301	335.324	231.85	203.206	296.655	249.182	280.101	VPS39 subunit of HOPS complex [Source:HGNC Symbol;Acc:HGNC:20593]
GPR153	ENSCDRG00005006620	58.3192	-0.880975	0.327279	-2.69182	0.00710638	0.201515	77.5723	56.3035	117.446	49.1945	77.1723	20.8071	52.4402	48.5543	50.1228	33.5794	G protein-coupled receptor 153 [Source:HGNC Symbol;Acc:HGNC:23618]
ATP6AP2	ENSCDRG00005020065	250.084	0.609438	0.226522	2.69041	0.00713644	0.202019	199.472	147.179	162.873	244.879	236.298	212.034	273.126	391.987	251.33	381.658	ATPase H+ transporting accessory protein 2 [Source:NCBI gene;Acc:105104763]
ITGAM	ENSCDRG00005014442	356.226	0.913644	0.33973	2.68932	0.00715971	0.202329	249.34	388.198	188.356	204.43	204.882	969.016	415.151	219.086	374.489	349.307	integrin subunit alpha M [Source:NCBI gene;Acc:105089721]
GRM5	ENSCDRG00005009561	128.849	-0.599183	0.222888	-2.68827	0.00718235	0.202621	188.39	125.448	158.441	146.49	168.003	80.2559	67.7352	129.083	92.3691	132.27	glutamate metabotropic receptor 5 [Source:HGNC Symbol;Acc:HGNC:4597]
ENSCDRG00005018731	ENSCDRG00005018731	16.4631	1.69157	0.629782	2.68596	0.00723226	0.202985	5.54088	11.8534	6.64788	13.6651	0	42.605	26.2201	20.1323	17.901	20.0657	proteolipid protein 2 [Source:NCBI gene;Acc:105103286]
REXO5	ENSCDRG00005019466	27.8419	-1.02074	0.379939	-2.6866	0.00721832	0.202985	66.4905	34.5723	44.3192	24.0506	22.5371	10.899	19.6651	21.9086	14.3208	19.6562	RNA exonuclease 5 [Source:NCBI gene;Acc:105091125]
MAPK3	ENSCDRG00005008768	336.254	-0.415648	0.154724	-2.68638	0.00722305	0.202985	299.207	339.797	397.765	496.317	373.569	261.575	321.196	301.984	282.836	288.291	mitogen-activated protein kinase 3 [Source:HGNC Symbol;Acc:HGNC:6877]
ENSCDRG00005001753	ENSCDRG00005001753	184.693	-0.527642	0.196779	-2.6814	0.00733159	0.205063	249.34	213.361	224.92	197.871	204.882	99.0814	207.576	173.493	139.628	136.775	nan
ALDH8A1	ENSCDRG00005021478	7.09168	-2.44454	0.91205	-2.68027	0.00735617	0.205063	38.7861	4.93891	13.2958	1.63982	3.4147	2.97244	0	1.77638	2.86416	1.22851	aldehyde dehydrogenase 8 family member A1 [Source:NCBI gene;Acc:105092028]
GIPR	ENSCDRG00005009575	25.5367	-1.73307	0.646315	-2.68146	0.00733007	0.205063	99.7358	22.719	46.5351	3.27963	28.0006	3.96326	8.74003	13.0268	17.901	11.4661	gastric inhibitory polypeptide receptor [Source:HGNC Symbol;Acc:HGNC:4271]
TNFRSF21	ENSCDRG00005018082	254.811	-0.369418	0.137825	-2.68034	0.00735466	0.205063	349.075	285.469	300.262	254.718	260.2	194.2	227.241	218.494	240.589	217.856	TNF receptor superfamily member 21 [Source:HGNC Symbol;Acc:HGNC:13469]
ENSCDRG00005006191	ENSCDRG00005006191	5.81142	-2.81381	1.05021	-2.67929	0.00737788	0.20532	22.1635	5.92669	18.8356	0	4.78059	2.97244	0	1.18425	1.43208	0.819009	nan
PPP2R2C	ENSCDRG00005001398	319.932	-0.364984	0.136321	-2.67738	0.00742005	0.206145	277.044	427.709	364.525	337.255	382.447	285.354	266.571	309.09	277.823	271.501	protein phosphatase 2 regulatory subunit Bgamma [Source:HGNC Symbol;Acc:HGNC:9306]
ACTA2	ENSCDRG00005007102	194.539	-0.960268	0.359134	-2.67384	0.00749872	0.207065	132.981	283.493	147.361	282.595	435.716	65.3937	96.1403	119.017	237.725	144.965	actin alpha 2, smooth muscle [Source:NCBI gene;Acc:105102830]
ENSCDRG00005013901	ENSCDRG00005013901	29.346	-1.71157	0.639909	-2.67471	0.00747945	0.207065	132.981	27.6579	39.8873	16.3982	10.2441	4.95407	26.2201	7.69763	20.0491	7.37108	nan
ENSCDRG00005019549	ENSCDRG00005019549	10.4722	2.34126	0.875517	2.67414	0.00749202	0.207065	0	4.93891	0	2.18642	7.51235	12.8806	56.8102	4.737	7.87644	7.78059	nan
SLC9A4	ENSCDRG00005004482	6.23697	-2.89152	1.0815	-2.67363	0.00750355	0.207065	22.1635	9.87781	19.9436	0.546605	3.4147	0	0	0.592125	5.01228	0.819009	solute carrier family 9 member A4 [Source:HGNC Symbol;Acc:HGNC:11077]
PIP5K1C	ENSCDRG00005005583	603.587	-0.415254	0.155414	-2.67192	0.00754189	0.207775	725.855	591.681	846.496	649.913	633.086	496.398	640.207	554.229	416.019	481.987	phosphatidylinositol-4-phosphate 5-kinase type 1 gamma [Source:HGNC Symbol;Acc:HGNC:8996]
ATP13A3	ENSCDRG00005013410	222.924	0.596998	0.223918	2.66615	0.00767247	0.210865	99.7358	161.008	178.385	199.511	233.566	393.353	216.316	245.732	256.342	245.293	ATPase 13A3 [Source:HGNC Symbol;Acc:HGNC:24113]
ENSCDRG00005013819	ENSCDRG00005013819	6.32063	-2.05031	0.769107	-2.66584	0.00767972	0.210865	16.6226	9.87781	12.1878	3.27963	8.19529	0.990814	6.55502	3.55275	0.71604	1.22851	nan
ENG	ENSCDRG00005012593	186.036	0.576586	0.216386	2.66462	0.00770742	0.211134	160.685	159.033	134.065	136.651	158.442	302.198	196.651	160.466	281.404	170.763	endoglin [Source:HGNC Symbol;Acc:HGNC:3349]
MOGS	ENSCDRG00005006347	48.5736	0.813152	0.305205	2.66429	0.00771519	0.211134	27.7044	54.328	44.3192	27.8769	19.8053	64.4029	76.4752	57.4362	54.419	58.9687	mannosyl-oligosaccharide glucosidase [Source:HGNC Symbol;Acc:HGNC:24862]
IGFBP7	ENSCDRG00005011222	336.091	0.474489	0.178157	2.66332	0.00773734	0.211389	193.931	298.31	283.643	329.603	286.152	462.71	325.566	310.274	474.734	395.991	insulin like growth factor binding protein 7 [Source:HGNC Symbol;Acc:HGNC:5476]
ENSCDRG00005005825	ENSCDRG00005005825	7.95954	1.56661	0.588508	2.662	0.00776785	0.21187	5.54088	2.96334	5.5399	3.27963	3.4147	8.91733	17.4801	7.69763	15.7529	9.0091	nan
SELENOK	ENSCDRG00005015168	104.823	0.513176	0.192986	2.65914	0.00783408	0.213323	83.1132	70.1325	67.5867	104.948	102.441	123.852	124.545	123.754	121.727	126.127	selenoprotein K [Source:NCBI gene;Acc:105089778]
EPHB2	ENSCDRG00005014531	85.507	-0.797996	0.300531	-2.65529	0.00792406	0.215417	171.767	80.0103	124.094	88.0034	85.3676	27.7428	78.6603	66.9102	75.1842	57.3306	EPH receptor B2 [Source:NCBI gene;Acc:105088876]
ENSCDRG00005015449	ENSCDRG00005015449	7.48489	-1.46061	0.550635	-2.6526	0.00798742	0.216781	5.54088	13.8289	11.0798	11.4787	12.9759	2.97244	2.18501	4.14488	5.72832	4.91405	nan
CACNG8	ENSCDRG00005002535	37.1774	-1.06368	0.401495	-2.6493	0.00806577	0.217472	66.4905	43.4624	45.4271	43.7284	48.4888	20.8071	54.6252	10.0661	24.3453	14.3327	calcium voltage-gated channel auxiliary subunit gamma 8 [Source:HGNC Symbol;Acc:HGNC:13628]
SLC38A1	ENSCDRG00005013640	462.397	0.515535	0.194566	2.64967	0.00805702	0.217472	332.453	349.675	381.145	406.128	432.985	545.939	310.271	561.335	650.88	653.16	solute carrier family 38 member 1 [Source:NCBI gene;Acc:105097082]
ENSCDRG00005009813	ENSCDRG00005009813	11.5559	-2.43129	0.917286	-2.65053	0.00803666	0.217472	66.4905	11.8534	17.7277	1.63982	2.04882	7.92651	0	2.96063	2.86416	2.04752	nan
MBOAT1	ENSCDRG00005018333	30.4687	-0.968575	0.365582	-2.6494	0.00806344	0.217472	49.8679	37.5357	54.291	22.4108	38.9276	14.8622	24.0351	13.0268	30.0737	19.6562	membrane bound O-acyltransferase domain containing 1 [Source:NCBI gene;Acc:105089120]
ZNF827	ENSCDRG00005020126	125.483	-0.535578	0.202263	-2.64793	0.00809854	0.217642	155.145	125.448	193.896	116.973	151.613	80.2559	120.175	93.5558	111.702	106.062	zinc finger protein 827 [Source:NCBI gene;Acc:105091207]
ENSCDRG00005005571	ENSCDRG00005005571	37.2428	-0.845956	0.319417	-2.64844	0.0080865	0.217642	16.6226	36.5479	67.5867	52.4741	59.4159	32.6969	30.5901	20.7244	30.7897	24.9798	nan
LMOD2	ENSCDRG00005005071	7.42798	-2.2871	0.864393	-2.6459	0.00814744	0.218599	22.1635	5.92669	19.9436	2.73303	9.56117	0	8.74003	2.96063	1.43208	0.819009	leiomodin 2 [Source:HGNC Symbol;Acc:HGNC:6648]
SPHK1	ENSCDRG00005003776	56.5964	1.03101	0.389784	2.64507	0.00816739	0.218777	38.7861	44.4502	43.2112	24.5972	33.4641	95.1181	139.84	31.3827	70.8879	44.2265	sphingosine kinase 1 [Source:NCBI gene;Acc:105092188]
ZDHHC22	ENSCDRG00005001794	54.8551	-0.769903	0.291661	-2.63972	0.00829737	0.221178	83.1132	64.2058	86.4224	46.4614	63.5135	31.706	69.9202	37.3039	31.5057	34.3984	zinc finger DHHC-type containing 22 [Source:NCBI gene;Acc:105086069]
SLC17A7	ENSCDRG00005006915	26.7264	-1.71072	0.647974	-2.64011	0.00828797	0.221178	94.1949	41.4868	50.967	4.91945	15.0247	7.92651	17.4801	14.8031	17.185	3.27604	solute carrier family 17 member 7 [Source:HGNC Symbol;Acc:HGNC:16704]
GNS	ENSCDRG00005010193	362.88	0.520423	0.197075	2.64073	0.00827271	0.221178	205.013	280.53	260.375	377.704	355.129	459.738	294.976	466.003	414.587	514.747	N-acetylglucosamine-6-sulfatase [Source:NCBI gene;Acc:105089259]
SIPA1	ENSCDRG00005004728	216.097	0.922169	0.349712	2.63694	0.00836575	0.221357	88.6541	236.08	185.033	110.961	118.149	532.067	334.306	164.019	231.997	159.707	signal-induced proliferation-associated 1 [Source:HGNC Symbol;Acc:HGNC:10885]
DKK3	ENSCDRG00005019246	949.933	0.500485	0.189814	2.63671	0.00837136	0.221357	603.956	615.388	949.538	816.628	933.58	781.752	1317.56	1323.99	1021.79	1135.15	dickkopf WNT signaling pathway inhibitor 3 [Source:NCBI gene;Acc:105086700]
SGSM3	ENSCDRG00005016107	234.155	0.560127	0.212385	2.63732	0.00835649	0.221357	149.604	182.74	204.976	191.312	204.199	314.088	417.336	245.732	191.183	240.379	small G protein signaling modulator 3 [Source:HGNC Symbol;Acc:HGNC:25228]
EFR3B	ENSCDRG00005009818	891.487	0.446299	0.16917	2.63817	0.00833538	0.221357	664.905	588.718	876.412	807.336	827.724	845.164	1105.61	1169.45	811.273	1218.28	EFR3 homolog B [Source:NCBI gene;Acc:105100033]
SEC23B	ENSCDRG00005003558	224.298	0.380458	0.144198	2.63844	0.00832891	0.221357	188.39	180.764	178.385	221.375	202.833	257.612	249.091	261.127	218.392	285.015	SEC23 homolog B, coat complex II component [Source:HGNC Symbol;Acc:HGNC:10702]
MT1A	ENSCDRG00005002683	37.7314	0.913852	0.346689	2.63594	0.00839034	0.221488	33.2453	22.719	24.3755	21.8642	32.0982	80.2559	26.2201	32.5669	54.419	49.55	metallothionein-2-like [Source:NCBI gene;Acc:105102677]
ENSCDRG00005004293	ENSCDRG00005004293	212.128	0.417756	0.158516	2.63542	0.00840325	0.221488	182.849	159.033	182.817	180.38	197.37	235.814	314.641	223.823	203.355	241.198	presenilin 2 [Source:NCBI gene;Acc:105099573]
PLBD2	ENSCDRG00005014620	240.97	0.518469	0.196888	2.63332	0.00845537	0.222505	177.308	178.788	195.004	203.337	226.736	229.869	404.226	302.576	204.787	287.063	phospholipase B domain containing 2 [Source:NCBI gene;Acc:105104929]
EXD1	ENSCDRG00005020180	9.38633	-2.08524	0.793274	-2.62866	0.00857232	0.223792	33.2453	11.8534	24.3755	6.55926	2.04882	3.96326	0	4.14488	6.44436	1.22851	exonuclease 3'-5' domain containing 1 [Source:NCBI gene;Acc:105096906]
LGMN	ENSCDRG00005000627	126.61	0.62743	0.238514	2.63058	0.00852387	0.223792	66.4905	120.509	89.7463	120.253	93.5629	224.915	100.51	134.412	151.084	164.621	legumain [Source:NCBI gene;Acc:105095852]
ZDBF2	ENSCDRG00005017378	214.454	0.745342	0.283439	2.62964	0.0085475	0.223792	94.1949	129.399	158.441	254.171	154.345	222.933	288.421	276.523	158.245	407.866	zinc finger DBF-type containing 2 [Source:HGNC Symbol;Acc:HGNC:29313]
CDKN1A	ENSCDRG00005012011	29.4107	0.873439	0.332134	2.62978	0.00854397	0.223792	16.6226	30.6212	16.6197	13.1185	25.2688	34.6785	43.7001	30.7905	40.0982	42.5885	cyclin dependent kinase inhibitor 1A [Source:NCBI gene;Acc:105101330]
ICAM1	ENSCDRG00005006651	35.533	1.06184	0.403934	2.62874	0.00857015	0.223792	16.6226	39.5112	13.2958	20.771	21.1712	69.357	69.9202	33.159	46.5426	24.9798	intercellular adhesion molecule 1 [Source:NCBI gene;Acc:105087642]
ITPKA	ENSCDRG00005020039	9.19397	-2.6913	1.02602	-2.62303	0.00871511	0.225343	60.9497	3.95112	9.97181	2.18642	4.78059	0	0	3.55275	5.72832	0.819009	inositol-trisphosphate 3-kinase A [Source:NCBI gene;Acc:105096854]
ANLN	ENSCDRG00005000123	387.086	0.627026	0.239109	2.62234	0.00873287	0.225343	171.767	502.781	267.023	238.866	328.495	490.453	371.451	491.464	558.511	450.045	anillin actin binding protein [Source:HGNC Symbol;Acc:HGNC:14082]
ENSCDRG00005015990	ENSCDRG00005015990	19.0886	-3.19769	1.21897	-2.62327	0.00870915	0.225343	138.522	13.8289	11.0798	0.546605	9.56117	3.96326	0	8.88188	2.86416	1.63802	interferon lambda 3 [Source:NCBI gene;Acc:105093312]
ENSCDRG00005016181	ENSCDRG00005016181	19.0886	-3.19769	1.21897	-2.62327	0.00870915	0.225343	138.522	13.8289	11.0798	0.546605	9.56117	3.96326	0	8.88188	2.86416	1.63802	interferon lambda 3 [Source:NCBI gene;Acc:105093312]
CBLC	ENSCDRG00005006067	10.2944	-2.45773	0.93737	-2.62194	0.00874302	0.225343	55.4088	6.91447	15.5117	2.73303	8.87823	0	0	2.96063	9.30851	1.22851	Cbl proto-oncogene C [Source:HGNC Symbol;Acc:HGNC:15961]
PLCB4	ENSCDRG00005006970	151.71	-0.551389	0.210051	-2.62502	0.00866435	0.225343	132.981	158.045	198.328	211.536	196.004	82.2376	122.36	140.926	117.43	157.25	phospholipase C beta 4 [Source:HGNC Symbol;Acc:HGNC:9059]
KIF26B	ENSCDRG00005010480	132.702	-0.678231	0.258711	-2.62157	0.00875249	0.225343	193.931	178.788	163.981	125.173	150.93	77.2835	183.541	91.1873	70.8879	91.3195	kinesin family member 26B [Source:HGNC Symbol;Acc:HGNC:25484]
ENSCDRG00005010510	ENSCDRG00005010510	11.0212	-1.51389	0.577496	-2.62147	0.00875505	0.225343	33.2453	18.7678	13.2958	8.74568	10.2441	2.97244	4.37001	4.14488	10.7406	3.68554	nan
PKNOX2	ENSCDRG00005016833	54.2979	-0.725426	0.276314	-2.62537	0.00865544	0.225343	88.6541	62.2302	63.1548	67.2324	56.0012	26.752	69.9202	31.9748	36.518	40.5409	PBX/knotted 1 homeobox 2 [Source:NCBI gene;Acc:105094458]
MAPT	ENSCDRG00005021733	686.543	-0.310846	0.118661	-2.61962	0.00880271	0.225873	731.396	746.763	772.261	802.963	736.21	594.488	725.422	641.272	512.684	601.972	microtubule associated protein tau [Source:NCBI gene;Acc:105090432]
PSMB4	ENSCDRG00005010934	206.428	0.420634	0.160571	2.61961	0.0088031	0.225873	116.358	168.911	165.089	217.549	196.004	220.952	244.721	248.101	241.305	245.293	proteasome 20S subunit beta 4 [Source:NCBI gene;Acc:105103219]
ENSCDRG00005001301	ENSCDRG00005001301	21.8417	-1.03487	0.395349	-2.61762	0.00885451	0.226134	33.2453	24.6945	26.5915	31.1565	28.0006	19.8163	26.2201	10.0661	7.1604	11.4661	nan
EPB41L1	ENSCDRG00005016895	1203.49	-0.411435	0.157179	-2.61762	0.00885447	0.226134	1196.83	1095.45	1556.71	1470.37	1540.71	816.431	1147.13	1208.53	909.37	1093.38	erythrocyte membrane protein band 4.1 like 1 [Source:HGNC Symbol;Acc:HGNC:3378]
SIAE	ENSCDRG00005015613	143.903	0.532123	0.203225	2.61839	0.00883452	0.226134	77.5723	144.216	108.582	114.787	134.539	154.567	150.765	193.033	141.06	219.904	sialic acid acetylesterase [Source:NCBI gene;Acc:105094472]
PLEKHM3	ENSCDRG00005016026	165.407	-0.433445	0.165649	-2.61665	0.00887975	0.226427	210.553	170.886	197.22	194.591	185.077	132.769	124.545	143.886	118.863	175.677	pleckstrin homology domain containing M3 [Source:HGNC Symbol;Acc:HGNC:34006]
ACOT9	ENSCDRG00005021651	149.81	0.625662	0.239208	2.61556	0.00890819	0.2268	99.7358	102.729	117.446	176.553	89.4653	166.457	150.765	198.362	149.652	246.931	acyl-CoA thioesterase 9 [Source:NCBI gene;Acc:105103963]
SCN4B	ENSCDRG00005019673	23.1228	-1.64371	0.628707	-2.61443	0.00893764	0.227198	72.0314	31.609	53.183	8.19908	10.9271	2.97244	21.8501	6.51338	15.7529	8.19009	sodium voltage-gated channel beta subunit 4 [Source:NCBI gene;Acc:105090178]
CNKSR1	ENSCDRG00005005684	32.0473	1.36264	0.521567	2.61258	0.00898613	0.227727	22.1635	19.7556	23.2676	6.01266	19.1223	70.3478	87.4003	17.7638	35.802	18.8372	connector enhancer of kinase suppressor of Ras 1 [Source:HGNC Symbol;Acc:HGNC:19700]
DCC	ENSCDRG00005021692	90.535	-0.575662	0.220307	-2.613	0.00897517	0.227727	149.604	94.827	111.906	95.6559	103.124	79.2651	39.3301	70.4629	80.9125	80.2629	DCC netrin 1 receptor [Source:HGNC Symbol;Acc:HGNC:2701]
MYH15	ENSCDRG00005000531	17.2694	-1.56185	0.597988	-2.61183	0.00900582	0.227875	44.327	21.7312	42.1032	5.46605	17.7565	3.96326	6.55502	11.2504	15.0368	4.50455	myosin heavy chain 15 [Source:HGNC Symbol;Acc:HGNC:31073]
IMPDH2	ENSCDRG00005004218	151.796	0.495655	0.189849	2.61079	0.00903339	0.228222	94.1949	110.631	107.474	155.782	148.198	150.604	218.501	168.164	182.59	181.82	inosine monophosphate dehydrogenase 2 [Source:NCBI gene;Acc:105087813]
IPMK	ENSCDRG00005011329	57.9087	0.693085	0.265526	2.61024	0.00904799	0.22824	33.2453	49.3891	44.3192	51.3809	41.6594	52.5131	45.8851	90.0031	85.9248	84.7674	inositol polyphosphate multikinase [Source:HGNC Symbol;Acc:HGNC:20739]
OLFM1	ENSCDRG00005022295	195.721	-0.478596	0.183477	-2.60848	0.00909443	0.22906	238.258	177.801	211.624	262.917	250.639	116.916	168.246	174.677	166.121	190.01	olfactomedin 1 [Source:HGNC Symbol;Acc:HGNC:17187]
PTGES	ENSCDRG00005000446	7.7381	1.90111	0.729729	2.60523	0.00918128	0.230894	5.54088	1.97556	4.43192	3.82624	1.36588	6.9357	24.0351	5.32913	18.617	5.32356	prostaglandin E synthase [Source:NCBI gene;Acc:105092543]
LINGO1	ENSCDRG00005003723	54.9238	-0.812573	0.312109	-2.60349	0.00922796	0.231713	60.9497	80.9981	101.934	48.1012	54.6353	24.7704	61.1802	46.7779	37.9501	31.9414	leucine rich repeat and Ig domain containing 1 [Source:HGNC Symbol;Acc:HGNC:21205]
CCBE1	ENSCDRG00005019050	5.44195	-2.43938	0.937339	-2.60245	0.00925601	0.232063	11.0818	6.91447	22.1596	3.27963	3.4147	0.990814	0	4.737	1.43208	0.409505	collagen and calcium binding EGF domains 1 [Source:HGNC Symbol;Acc:HGNC:29426]
PNRC1	ENSCDRG00005018021	127.183	0.586088	0.225632	2.59754	0.00938942	0.234376	94.1949	122.485	59.8309	105.495	121.563	191.227	168.246	136.781	136.048	135.955	proline rich nuclear receptor coactivator 1 [Source:HGNC Symbol;Acc:HGNC:17278]
ENSCDRG00005020744	ENSCDRG00005020744	38.6914	-1.77709	0.684158	-2.59748	0.00939101	0.234376	132.981	66.1813	74.2346	4.91945	21.1712	6.9357	39.3301	13.0268	23.6293	4.50455	nan
WFDC10A	ENSCDRG00005018546	5.56617	-2.86112	1.10131	-2.59793	0.00937878	0.234376	22.1635	3.95112	19.9436	0.546605	3.4147	0	0	2.3685	2.86416	0.409505	WAP four-disulfide core domain 10A [Source:HGNC Symbol;Acc:HGNC:16139]
ENSCDRG00005013169	ENSCDRG00005013169	109.695	0.808893	0.311495	2.59681	0.00940947	0.234481	38.7861	52.3524	79.7745	97.8423	121.563	181.319	76.4752	110.727	174.714	163.392	nan
GPNMB	ENSCDRG00005000107	61.7454	0.6098	0.234898	2.59602	0.00943103	0.234663	33.2453	48.4013	50.967	45.9148	62.1476	75.3019	52.4402	84.0818	91.6531	73.3013	glycoprotein nmb [Source:HGNC Symbol;Acc:HGNC:4462]
PTPN6	ENSCDRG00005019443	65.5331	0.976766	0.376435	2.59478	0.00946524	0.235158	33.2453	34.5723	53.183	42.0886	54.6353	173.392	63.3652	47.37	103.11	50.3691	protein tyrosine phosphatase non-receptor type 6 [Source:NCBI gene;Acc:105098192]
ENSCDRG00005007485	ENSCDRG00005007485	7.96924	-2.16365	0.83493	-2.59142	0.00955814	0.236225	33.2453	7.90225	17.7277	1.09321	7.51235	2.97244	0	4.737	2.86416	1.63802	nan
ENSCDRG00005010614	ENSCDRG00005010614	54.541	0.820554	0.316605	2.59173	0.0095496	0.236225	11.0818	49.3891	59.8309	39.3556	27.3176	77.2835	100.51	65.7259	63.7275	51.1881	nan
ENSCDRG00005021455	ENSCDRG00005021455	86.8388	2.11863	0.817642	2.59115	0.00956561	0.236225	11.0818	77.0469	23.2676	45.9148	2.73176	284.364	76.4752	90.0031	214.096	43.4075	nan
CLK3	ENSCDRG00005005008	68.0698	0.604728	0.233351	2.5915	0.00955588	0.236225	38.7861	60.2546	50.967	49.7411	64.1964	105.026	80.8453	60.3968	90.221	80.2629	CDC like kinase 3 [Source:NCBI gene;Acc:105087265]
FERMT3	ENSCDRG00005018709	84.1574	0.920498	0.355379	2.59019	0.00959227	0.236528	66.4905	64.2058	42.1032	50.8343	67.6112	209.062	122.36	62.7653	101.678	54.4641	fermitin family member 3 [Source:HGNC Symbol;Acc:HGNC:23151]
GPR176	ENSCDRG00005001204	86.0703	-0.718811	0.27761	-2.58928	0.00961769	0.236691	138.522	81.9858	80.8825	118.067	124.295	42.605	37.1451	83.4897	70.1719	83.5389	G protein-coupled receptor 176 [Source:NCBI gene;Acc:105096893]
FLT1	ENSCDRG00005003978	310.425	0.62509	0.241448	2.58892	0.00962767	0.236691	177.308	306.212	146.253	297.9	284.103	480.545	299.346	273.562	441.796	397.219	fms related tyrosine kinase 1 [Source:HGNC Symbol;Acc:HGNC:3763]
HTR5A	ENSCDRG00005014031	15.2989	-1.00806	0.389644	-2.58714	0.00967755	0.237208	27.7044	20.7434	22.1596	16.9448	17.7565	8.91733	6.55502	11.8425	9.30851	11.0566	5-hydroxytryptamine receptor 5A [Source:HGNC Symbol;Acc:HGNC:5300]
5S_rRNA	ENSCDRG00005015147	9.4207	-2.95212	1.1409	-2.58755	0.00966611	0.237208	77.5723	2.96334	1.10798	1.09321	1.36588	0.990814	4.37001	1.77638	2.14812	0.819009	5S ribosomal RNA [Source:RFAM;Acc:RF00001]
KCNH7	ENSCDRG00005004079	71.9708	-0.682466	0.264184	-2.5833	0.00978601	0.238213	121.899	87.9125	96.3942	79.8043	66.9282	42.605	41.5151	64.5417	41.5303	76.5773	potassium voltage-gated channel subfamily H member 7 [Source:HGNC Symbol;Acc:HGNC:18863]
PHTF2	ENSCDRG00005017875	119.177	0.716179	0.277067	2.58486	0.00974196	0.238213	60.9497	91.8636	78.6665	113.694	99.7094	244.731	80.8453	137.965	156.813	126.537	putative homeodomain transcription factor 2 [Source:NCBI gene;Acc:105093005]
ENSCDRG00005009642	ENSCDRG00005009642	5.90512	-3.76754	1.45798	-2.58408	0.00976386	0.238213	49.8679	0.987781	0	2.73303	2.04882	1.98163	0	0	1.43208	0	nan
ENSCDRG00005021320	ENSCDRG00005021320	29.3991	1.13413	0.43914	2.58262	0.00980544	0.238213	16.6226	31.609	25.4835	7.10587	11.61	57.4672	43.7001	36.1197	22.9133	41.36	nan
C11orf91	ENSCDRG00005018309	1702.99	0.656231	0.253974	2.58386	0.00977028	0.238213	1008.44	983.83	1134.57	1812.54	1665.01	1487.21	1448.66	2692.39	1706.32	3090.94	CD59 molecule (CD59 blood group) [Source:NCBI gene;Acc:105106799]
ENSCDRG00005019375	ENSCDRG00005019375	68.1375	-0.60956	0.235981	-2.58309	0.00979188	0.238213	66.4905	95.8148	111.906	61.7664	72.3917	59.4488	58.9952	51.5149	55.135	47.912	nan
DOCK11	ENSCDRG00005009656	134.201	0.537927	0.208421	2.58096	0.00985271	0.239008	60.9497	112.607	93.0703	151.956	115.417	165.466	133.285	173.493	156.813	178.953	dedicator of cytokinesis 11 [Source:NCBI gene;Acc:105093949]
A2M	ENSCDRG00005021498	89.2352	1.01195	0.392295	2.57957	0.00989244	0.239618	60.9497	87.9125	67.5867	56.3003	23.9029	237.795	96.1403	88.2267	111.702	61.8352	alpha-2-macroglobulin-like [Source:NCBI gene;Acc:105098164]
CBX5	ENSCDRG00005004307	113.888	-0.433241	0.168035	-2.57827	0.00992952	0.240163	155.145	112.607	116.338	144.304	129.759	86.2008	104.88	95.9243	93.8012	99.9191	chromobox 5 [Source:NCBI gene;Acc:105101009]
NRK	ENSCDRG00005006254	180.815	0.832736	0.323073	2.57755	0.00995042	0.240315	94.1949	119.522	103.042	172.181	155.711	466.673	126.73	210.205	196.911	162.983	Nik related kinase [Source:HGNC Symbol;Acc:HGNC:25391]
NEFL	ENSCDRG00005018138	922.809	-0.634524	0.246331	-2.5759	0.00999787	0.241107	1268.86	879.125	1206.59	1253.91	1000.51	396.326	1177.72	839.634	576.412	628.999	neurofilament light [Source:HGNC Symbol;Acc:HGNC:7739]
LRRC8A	ENSCDRG00005001521	666.361	0.425968	0.165532	2.57332	0.0100727	0.242202	415.566	492.903	703.567	569.562	641.282	621.24	919.888	707.59	786.928	805.086	leucine rich repeat containing 8 VRAC subunit A [Source:NCBI gene;Acc:105092557]
ENSCDRG00005021215	ENSCDRG00005021215	183.027	0.418555	0.162629	2.57368	0.0100625	0.242202	132.981	149.155	144.037	169.994	175.516	225.906	244.721	167.572	203.355	217.037	nan
FERMT2	ENSCDRG00005001748	192.983	0.463074	0.180024	2.57229	0.0101027	0.242569	105.277	159.033	158.441	184.753	190.541	196.181	194.466	217.31	278.539	245.293	fermitin family member 2 [Source:HGNC Symbol;Acc:HGNC:15767]
PRAM1	ENSCDRG00005010701	62.7465	-0.777644	0.3025	-2.57073	0.0101485	0.243313	72.0314	71.1202	130.742	61.7664	57.367	36.6601	69.9202	51.5149	35.802	40.5409	PML-RARA regulated adaptor molecule 1 [Source:HGNC Symbol;Acc:HGNC:30091]
DNASE1L1	ENSCDRG00005012179	84.848	0.553491	0.215375	2.56989	0.010173	0.243438	66.4905	59.2669	68.6947	74.3383	71.0259	92.1457	135.47	93.5558	74.4681	113.023	deoxyribonuclease 1 like 1 [Source:HGNC Symbol;Acc:HGNC:2957]
ENSCDRG00005014043	ENSCDRG00005014043	14.3906	-1.0332	0.402173	-2.56904	0.0101981	0.243438	22.1635	20.7434	16.6197	21.3176	17.7565	10.899	4.37001	12.4346	8.59248	9.0091	olfactory receptor 2AG2-like [Source:NCBI gene;Acc:105096173]
IL1RL1	ENSCDRG00005004642	9.85914	-2.174	0.846073	-2.56952	0.0101839	0.243438	33.2453	12.8412	27.6995	1.09321	6.82941	0	4.37001	4.737	5.72832	2.04752	interleukin 1 receptor like 1 [Source:NCBI gene;Acc:105099107]
ENSCDRG00005012447	ENSCDRG00005012447	113.838	0.622526	0.242393	2.56825	0.0102212	0.24355	72.0314	110.631	80.8825	77.0713	99.0264	138.714	207.576	149.216	101.678	101.557	nan
GYS1	ENSCDRG00005002986	261.714	0.549486	0.213985	2.56787	0.0102325	0.24355	249.34	248.921	237.108	150.863	179.613	327.959	439.186	236.258	282.12	265.768	glycogen synthase 1 [Source:HGNC Symbol;Acc:HGNC:4706]
REPS2	ENSCDRG00005014399	61.9007	-0.861151	0.335546	-2.56642	0.0102756	0.24387	88.6541	50.3768	113.014	76.5247	71.0259	22.7887	61.1802	43.2252	27.9255	64.2922	RALBP1 associated Eps domain containing 2 [Source:HGNC Symbol;Acc:HGNC:9963]
ENSCDRG00005014302	ENSCDRG00005014302	245.339	0.672727	0.262088	2.5668	0.0102642	0.24387	110.818	129.399	193.896	232.854	264.298	196.181	412.966	348.17	247.034	317.776	nan
SSR4	ENSCDRG00005008385	124.613	0.545727	0.212789	2.56464	0.0103284	0.244419	110.818	80.9981	89.7463	112.601	112.685	160.512	168.246	148.623	95.2333	166.668	signal sequence receptor subunit 4 [Source:NCBI gene;Acc:105098708]
ENSCDRG00005000717	ENSCDRG00005000717	5.83465	-3.08393	1.20247	-2.56465	0.0103279	0.244419	38.7861	2.96334	7.75585	0	4.09765	0	0	1.77638	2.14812	0.819009	nan
RHBG	ENSCDRG00005012851	10.1819	-2.18455	0.852922	-2.56126	0.0104294	0.246454	33.2453	2.96334	39.8873	3.27963	4.78059	2.97244	4.37001	5.92125	3.5802	0.819009	Rh family B glycoprotein [Source:NCBI gene;Acc:105105645]
P4HA3	ENSCDRG00005002632	45.1692	0.841061	0.328637	2.55924	0.0104901	0.246472	49.8679	28.6457	38.7793	19.6778	29.3665	58.458	93.9553	46.7779	44.3945	41.7695	prolyl 4-hydroxylase subunit alpha 3 [Source:HGNC Symbol;Acc:HGNC:30135]
GSE1	ENSCDRG00005010678	158.32	-0.731936	0.285942	-2.55973	0.0104752	0.246472	293.667	182.74	219.38	115.88	178.248	131.778	194.466	78.7527	100.246	88.0435	Gse1 coiled-coil protein [Source:HGNC Symbol;Acc:HGNC:28979]
SPATA19	ENSCDRG00005014148	5.93508	-3.25426	1.27127	-2.55985	0.0104716	0.246472	44.327	3.95112	3.32394	0	3.4147	0	0	1.77638	2.14812	0.409505	spermatogenesis associated 19 [Source:HGNC Symbol;Acc:HGNC:30614]
GRB10	ENSCDRG00005015047	161.209	0.656383	0.256435	2.55965	0.0104779	0.246472	116.358	163.972	97.5022	138.291	104.49	271.483	264.386	124.346	153.949	177.315	growth factor receptor bound protein 10 [Source:HGNC Symbol;Acc:HGNC:4564]
CYP21A2	ENSCDRG00005021227	6.05867	-1.88307	0.736335	-2.55736	0.0105471	0.247458	0	11.8534	13.2958	6.55926	15.7076	4.95407	0	4.737	1.43208	2.04752	cytochrome P450 family 21 subfamily A member 2 [Source:HGNC Symbol;Acc:HGNC:2600]
C9	ENSCDRG00005017085	9.18679	-2.17941	0.853335	-2.554	0.0106494	0.247574	27.7044	13.8289	28.8075	3.27963	3.4147	0.990814	0	4.737	7.87644	1.22851	complement C9 [Source:HGNC Symbol;Acc:HGNC:1358]
ENSCDRG00005018444	ENSCDRG00005018444	24.4807	-0.991626	0.387967	-2.55595	0.0105897	0.247574	66.4905	32.5968	18.8356	22.9574	29.3665	11.8898	10.925	14.8031	19.3331	17.6087	cilia and flagella associated protein 206 [Source:NCBI gene;Acc:105095548]
HERPUD1	ENSCDRG00005003213	200.262	0.568283	0.222502	2.55406	0.0106474	0.247574	105.277	173.849	108.582	219.189	188.492	266.529	185.726	242.771	228.417	283.787	homocysteine inducible ER protein with ubiquitin like domain 1 [Source:NCBI gene;Acc:105102673]
MTSS2	ENSCDRG00005010108	560.934	-0.347999	0.136223	-2.55462	0.0106305	0.247574	581.792	753.677	611.605	604.545	578.451	561.792	563.732	446.463	465.426	441.855	MTSS I-BAR domain containing 2 [Source:HGNC Symbol;Acc:HGNC:25094]
ENSCDRG00005018057	ENSCDRG00005018057	33.3211	-0.768676	0.300775	-2.55565	0.0105991	0.247574	44.327	47.4135	49.8591	33.3429	33.4641	30.7152	32.7751	18.948	21.4812	20.8847	nan
KIF13A	ENSCDRG00005017466	410.726	0.406139	0.159037	2.55374	0.0106574	0.247574	332.453	430.673	248.187	387.543	362.642	523.15	445.741	457.713	459.697	459.464	kinesin family member 13A [Source:HGNC Symbol;Acc:HGNC:14566]
FAM189A1	ENSCDRG00005005159	70.6689	-0.691355	0.270645	-2.55447	0.0106348	0.247574	88.6541	77.0469	89.7463	102.762	75.1235	30.7152	83.0303	59.2125	39.3822	61.0162	family with sequence similarity 189 member A1 [Source:HGNC Symbol;Acc:HGNC:29075]
RASGRF2	ENSCDRG00005017402	134.918	-0.653053	0.255798	-2.553	0.0106799	0.247746	160.685	95.8148	134.065	254.718	178.931	92.1457	98.3253	106.583	98.0974	129.813	Ras protein specific guanine nucleotide releasing factor 2 [Source:HGNC Symbol;Acc:HGNC:9876]
CD14	ENSCDRG00005019128	50.5183	1.15524	0.453092	2.54968	0.0107822	0.249066	60.9497	37.5357	18.8356	26.237	20.4882	141.686	72.1052	23.685	56.5671	47.093	CD14 molecule [Source:NCBI gene;Acc:105098101]
ENSCDRG00005001155	ENSCDRG00005001155	332.222	-0.322471	0.126455	-2.55009	0.0107696	0.249066	321.371	365.479	394.441	353.107	400.203	263.557	332.121	307.905	272.811	311.223	nan
SLC12A5	ENSCDRG00005019561	310.002	-0.613957	0.240777	-2.5499	0.0107755	0.249066	531.924	305.224	446.516	253.078	346.934	143.668	310.271	279.483	226.985	255.94	solute carrier family 12 member 5 [Source:HGNC Symbol;Acc:HGNC:13818]
RIPK1	ENSCDRG00005015351	69.0767	0.658358	0.25836	2.54822	0.0108273	0.249757	60.9497	65.1936	42.1032	60.1266	40.2935	110.971	96.1403	58.6204	74.4681	81.9009	receptor interacting serine/threonine kinase 1 [Source:HGNC Symbol;Acc:HGNC:10019]
HBB	ENSCDRG00005000828	9.90967	-1.98346	0.77943	-2.54475	0.0109355	0.251658	38.7861	20.7434	8.86383	5.46605	7.51235	5.94488	0	2.3685	8.59248	0.819009	hemoglobin subunit beta [Source:NCBI gene;Acc:105097953]
KCNG3	ENSCDRG00005021049	11.522	-1.67155	0.656901	-2.5446	0.0109403	0.251658	11.0818	8.89003	23.2676	25.6904	19.8053	0.990814	0	10.6583	10.7406	4.09505	potassium voltage-gated channel modifier subfamily G member 3 [Source:HGNC Symbol;Acc:HGNC:18306]
NAMPT	ENSCDRG00005008132	111.314	0.630463	0.247955	2.54265	0.0110017	0.252082	55.4088	98.7781	65.3708	104.948	105.856	142.677	80.8453	127.899	161.825	169.535	nicotinamide phosphoribosyltransferase [Source:NCBI gene;Acc:105093030]
ENSCDRG00005007985	ENSCDRG00005007985	6.47248	-2.49504	0.981504	-2.54206	0.0110201	0.252082	27.7044	6.91447	9.97181	0	11.61	3.96326	0	1.18425	2.14812	1.22851	nan
PAH	ENSCDRG00005009962	10.6574	-1.88786	0.74252	-2.5425	0.0110061	0.252082	44.327	5.92669	26.5915	3.27963	6.14647	2.97244	4.37001	6.51338	3.5802	2.86653	phenylalanine hydroxylase [Source:HGNC Symbol;Acc:HGNC:8582]
ENSCDRG00005009183	ENSCDRG00005009183	13.4303	1.91894	0.754533	2.54322	0.0109837	0.252082	11.0818	3.95112	5.5399	2.73303	6.82941	26.752	41.5151	0.592125	13.6048	21.7037	nan
UFSP1	ENSCDRG00005014985	9.12004	-1.73691	0.683591	-2.54087	0.0110578	0.252594	27.7044	6.91447	19.9436	14.2117	4.09765	2.97244	0	5.32913	7.1604	2.86653	UFM1 specific peptidase 1 (inactive) [Source:NCBI gene;Acc:105088570]
MANF	ENSCDRG00005012639	58.7962	0.655248	0.258115	2.53859	0.0111299	0.253887	60.9497	45.4379	40.9952	34.9827	53.9523	67.3754	52.4402	74.0157	61.5794	96.2336	mesencephalic astrocyte derived neurotrophic factor [Source:HGNC Symbol;Acc:HGNC:15461]
EDEM2	ENSCDRG00005014701	143.763	0.449404	0.17709	2.53772	0.0111576	0.254168	127.44	121.497	104.15	124.626	129.076	169.429	192.281	160.466	123.159	185.506	ER degradation enhancing alpha-mannosidase like protein 2 [Source:HGNC Symbol;Acc:HGNC:15877]
ENSCDRG00005003352	ENSCDRG00005003352	399.109	0.367177	0.14477	2.53627	0.0112039	0.254417	304.748	412.893	311.342	375.518	327.812	499.37	447.926	403.83	511.252	396.4	SWI/SNF related, matrix associated, actin dependent regulator of chromatin, subfamily a, member 2 [Source:NCBI gene;Acc:105100269]
ALDH1L1	ENSCDRG00005017361	119.782	0.54442	0.214617	2.53671	0.0111901	0.254417	88.6541	98.7781	126.31	83.6306	84.6847	159.521	194.466	118.425	118.863	124.489	aldehyde dehydrogenase 1 family member L1 [Source:HGNC Symbol;Acc:HGNC:3978]
ENSCDRG00005007350	ENSCDRG00005007350	28.8541	-0.962047	0.379367	-2.53593	0.011215	0.254417	55.4088	34.5723	54.291	18.5846	30.0494	14.8622	26.2201	13.6189	20.0491	20.8847	nan
ENSCDRG00005019303	ENSCDRG00005019303	17.253	-1.23965	0.489609	-2.53192	0.0113439	0.256988	49.8679	25.6823	26.5915	10.9321	12.9759	11.8898	6.55502	11.2504	5.72832	11.0566	mucosal vascular addressin cell adhesion molecule 1 [Source:NCBI gene;Acc:105093405]
CDC25C	ENSCDRG00005001179	6.03954	-1.85192	0.731813	-2.53059	0.0113871	0.257612	16.6226	15.8045	6.64788	6.55926	3.4147	3.96326	0	2.3685	2.14812	2.86653	cell division cycle 25C [Source:NCBI gene;Acc:105090655]
PPIP5K1	ENSCDRG00005012914	216.946	-0.396106	0.156641	-2.52875	0.0114469	0.258609	304.748	194.593	275.887	244.332	227.419	181.319	163.876	207.244	180.442	189.601	diphosphoinositol pentakisphosphate kinase 1 [Source:HGNC Symbol;Acc:HGNC:29023]
ENSCDRG00005002241	ENSCDRG00005002241	16.9913	-1.32457	0.523903	-2.52827	0.0114626	0.258609	49.8679	15.8045	27.6995	12.5719	17.7565	12.8806	13.11	9.47401	2.14812	8.59959	olfactory receptor 6B1-like [Source:NCBI gene;Acc:105104603]
EXOC3L4	ENSCDRG00005006387	5.64023	-3.10524	1.22885	-2.52694	0.0115062	0.258881	16.6226	4.93891	25.4835	0	4.09765	0.990814	0	3.55275	0.71604	0	exocyst complex component 3 like 4 [Source:HGNC Symbol;Acc:HGNC:20120]
ENSCDRG00005003940	ENSCDRG00005003940	7.58802	-3.43473	1.35902	-2.52736	0.0114923	0.258881	55.4088	1.97556	8.86383	0	4.09765	1.98163	0	3.55275	0	0	olfactory receptor 7D4-like [Source:NCBI gene;Acc:105105405]
LAP3	ENSCDRG00005019557	171.832	0.537661	0.212863	2.52586	0.0115416	0.259324	72.0314	131.375	110.798	179.286	189.175	211.043	205.391	196.586	210.516	212.123	leucine aminopeptidase 3 [Source:NCBI gene;Acc:105098348]
SNX2	ENSCDRG00005004687	128.201	0.575111	0.227807	2.52456	0.0115844	0.25993	77.5723	111.619	80.8825	118.067	122.246	192.218	89.5853	150.992	166.837	171.992	sorting nexin 2 [Source:NCBI gene;Acc:105105061]
ASPHD1	ENSCDRG00005010917	43.8647	0.8024	0.318067	2.52274	0.0116444	0.260564	16.6226	43.4624	29.9154	37.1691	25.2688	40.6234	89.5853	54.4755	40.0982	61.4257	aspartate beta-hydroxylase domain containing 1 [Source:NCBI gene;Acc:105102755]
PLA2G3	ENSCDRG00005012238	8.68624	-1.83043	0.725495	-2.52301	0.0116356	0.260564	33.2453	9.87781	11.0798	4.91945	10.9271	3.96326	2.18501	7.69763	2.14812	0.819009	phospholipase A2 group III [Source:HGNC Symbol;Acc:HGNC:17934]
LEF1	ENSCDRG00005012067	109.723	0.665226	0.264008	2.51971	0.011745	0.26246	116.358	72.108	50.967	91.8296	97.6606	148.622	168.246	79.3448	149.652	122.442	lymphoid enhancer binding factor 1 [Source:NCBI gene;Acc:105105289]
PTPN13	ENSCDRG00005005955	270.529	0.406957	0.161616	2.51804	0.0118009	0.262884	199.472	242.994	204.976	265.65	245.176	354.711	227.241	294.286	347.279	323.509	protein tyrosine phosphatase non-receptor type 13 [Source:NCBI gene;Acc:105091590]
RBP7	ENSCDRG00005014156	5.35338	-3.01803	1.19973	-2.51558	0.0118835	0.262884	33.2453	4.93891	8.86383	0	2.04882	0	0	1.77638	1.43208	1.22851	retinol binding protein 7 [Source:NCBI gene;Acc:105107007]
NCKAP1L	ENSCDRG00005011045	221.406	0.861869	0.34271	2.51486	0.0119079	0.262884	138.522	202.495	114.122	165.621	162.54	591.516	201.021	156.913	323.65	157.659	NCK associated protein 1 like [Source:HGNC Symbol;Acc:HGNC:4862]
IGF1	ENSCDRG00005010126	6.41899	-2.62802	1.04465	-2.51569	0.0118799	0.262884	16.6226	5.92669	25.4835	3.27963	4.78059	0	0	2.3685	5.72832	0	insulin like growth factor 1 [Source:NCBI gene;Acc:105097468]
SLC17A8	ENSCDRG00005017191	16.0777	-1.4535	0.577592	-2.51648	0.0118535	0.262884	60.9497	16.7923	11.0798	13.6651	17.0735	9.90814	15.295	4.14488	8.59248	3.27604	solute carrier family 17 member 8 [Source:NCBI gene;Acc:105097448]
MAP2K3	ENSCDRG00005020669	140.812	0.489407	0.194403	2.51749	0.0118194	0.262884	105.277	116.558	130.742	124.079	101.075	165.466	231.611	137.965	133.183	162.164	mitogen-activated protein kinase kinase 3 [Source:HGNC Symbol;Acc:HGNC:6843]
NPRL2	ENSCDRG00005009345	50.7009	0.660873	0.262421	2.51837	0.0117898	0.262884	38.7861	36.5479	36.5633	30.6099	53.9523	75.3019	56.8102	50.9228	55.8511	71.6633	NPR2 like, GATOR1 complex subunit [Source:NCBI gene;Acc:105087388]
STMND1	ENSCDRG00005016583	10.6351	-2.01072	0.799333	-2.5155	0.0118863	0.262884	44.327	16.7923	15.5117	1.09321	10.2441	3.96326	0	2.96063	8.59248	2.86653	stathmin domain containing 1 [Source:HGNC Symbol;Acc:HGNC:44668]
PRKCB	ENSCDRG00005004483	167.069	0.715206	0.284374	2.51502	0.0119024	0.262884	88.6541	161.008	135.173	115.334	125.661	387.408	172.616	141.518	186.886	156.431	protein kinase C beta [Source:HGNC Symbol;Acc:HGNC:9395]
ENSCDRG00005019482	ENSCDRG00005019482	49.119	1.02813	0.408937	2.51415	0.0119321	0.263066	27.7044	49.3891	21.0516	29.5167	30.0494	88.1825	126.73	39.6724	46.5426	32.3509	nan
HCLS1	ENSCDRG00005008645	91.6812	0.77479	0.308338	2.51279	0.011978	0.263485	83.1132	78.0347	56.5069	55.2071	68.2941	195.19	111.435	76.9763	128.171	63.8827	hematopoietic cell-specific Lyn substrate 1 [Source:HGNC Symbol;Acc:HGNC:4844]
EMC7	ENSCDRG00005002360	149.286	0.608567	0.24229	2.51173	0.012014	0.263485	66.4905	81.9858	166.197	143.757	121.563	156.549	187.911	207.244	142.492	218.675	ER membrane protein complex subunit 7 [Source:NCBI gene;Acc:105089978]
NEXN	ENSCDRG00005013657	14.2759	-1.55515	0.619163	-2.5117	0.0120152	0.263485	49.8679	16.7923	19.9436	10.9321	13.6588	2.97244	0	7.10551	15.7529	5.73306	nexilin F-actin binding protein [Source:NCBI gene;Acc:105096664]
TPCN1	ENSCDRG00005014193	208.35	0.493881	0.196571	2.51248	0.0119886	0.263485	132.981	179.776	212.732	179.286	149.564	323.005	273.126	182.967	230.565	219.494	two pore segment channel 1 [Source:NCBI gene;Acc:105104932]
IL2RB	ENSCDRG00005007983	19.5009	-1.77969	0.709043	-2.50999	0.0120736	0.264413	88.6541	14.8167	38.7793	5.46605	6.14647	4.95407	10.925	11.2504	10.7406	3.27604	interleukin 2 receptor subunit beta [Source:HGNC Symbol;Acc:HGNC:6009]
ABCA4	ENSCDRG00005001970	26.5332	-1.26751	0.505372	-2.50807	0.0121392	0.265498	83.1132	47.4135	35.4553	9.83889	16.3906	12.8806	15.295	15.9874	17.901	11.0566	ATP binding cassette subfamily A member 4 [Source:HGNC Symbol;Acc:HGNC:34]
ENSCDRG00005021090	ENSCDRG00005021090	173.678	0.846738	0.337922	2.50572	0.0122203	0.266915	105.277	173.849	109.69	122.986	103.807	401.28	312.456	125.531	166.837	115.071	nan
ENSCDRG00005001079	ENSCDRG00005001079	274.022	-0.4442	0.177309	-2.50523	0.0122371	0.266927	393.402	337.821	276.995	279.315	301.177	300.217	220.686	171.124	227.701	231.78	nan
RCAN3	ENSCDRG00005004258	96.2261	-0.599608	0.239456	-2.50404	0.0122783	0.267473	105.277	103.717	113.014	127.359	131.808	44.5866	63.3652	102.438	80.1964	90.5005	RCAN family member 3 [Source:HGNC Symbol;Acc:HGNC:3042]
APBB1	ENSCDRG00005015508	616.493	-0.423604	0.169325	-2.50173	0.0123589	0.267808	775.723	621.314	731.266	713.866	687.039	378.491	725.422	557.782	468.29	505.738	amyloid beta precursor protein binding family B member 1 [Source:NCBI gene;Acc:105097915]
SAXO1	ENSCDRG00005000701	9.3475	-2.32575	0.929473	-2.50223	0.0123413	0.267808	55.4088	6.91447	11.0798	5.46605	2.04882	0	0	3.55275	5.72832	3.27604	stabilizer of axonemal microtubules 1 [Source:NCBI gene;Acc:105095947]
PLEKHA6	ENSCDRG00005015653	805.636	-0.494894	0.197725	-2.50294	0.0123165	0.267808	1174.67	777.384	1153.41	677.244	932.897	733.202	900.223	561.927	589.301	556.107	pleckstrin homology domain containing A6 [Source:HGNC Symbol;Acc:HGNC:17053]
SCARA3	ENSCDRG00005019603	228.038	0.492705	0.196937	2.50184	0.0123551	0.267808	138.522	200.52	220.488	226.841	148.198	308.143	297.161	203.691	305.033	231.78	scavenger receptor class A member 3 [Source:HGNC Symbol;Acc:HGNC:19000]
IGSF1	ENSCDRG00005010964	86.4637	-0.742158	0.296778	-2.50072	0.0123942	0.268004	88.6541	108.656	54.291	134.465	148.881	44.5866	96.1403	65.1338	55.8511	67.9777	immunoglobulin superfamily member 1 [Source:NCBI gene;Acc:105098805]
ENSCDRG00005012277	ENSCDRG00005012277	10.9585	-1.93182	0.772563	-2.50054	0.0124005	0.268004	33.2453	15.8045	26.5915	4.91945	8.19529	0	2.18501	7.69763	9.30851	1.63802	membrane spanning 4-domains A14 [Source:NCBI gene;Acc:105094949]
DIS3L	ENSCDRG00005002526	103.548	0.535621	0.214266	2.49979	0.0124265	0.268183	55.4088	93.8392	76.4506	102.762	81.27	104.035	163.876	105.398	141.06	111.385	DIS3 like exosome 3'-5' exoribonuclease [Source:HGNC Symbol;Acc:HGNC:28698]
ENDOD1	ENSCDRG00005016090	250.168	0.501685	0.200725	2.49937	0.0124414	0.268183	188.39	177.801	223.812	225.201	217.175	222.933	305.901	383.105	210.516	346.85	endonuclease domain containing 1 [Source:HGNC Symbol;Acc:HGNC:29129]
CFAP46	ENSCDRG00005002787	257.73	0.69257	0.277268	2.49783	0.0124955	0.268645	232.717	191.63	237.108	136.651	189.175	480.545	447.926	186.52	239.157	235.875	cilia and flagella associated protein 46 [Source:HGNC Symbol;Acc:HGNC:25247]
ENSCDRG00005006899	ENSCDRG00005006899	13.2321	-1.6669	0.667302	-2.49797	0.0124907	0.268645	55.4088	19.7556	13.2958	3.82624	12.9759	6.9357	0	6.51338	7.87644	5.73306	nan
ENSCDRG00005015134	ENSCDRG00005015134	5.60129	-2.31007	0.926018	-2.49463	0.0126089	0.270714	27.7044	8.89003	4.43192	2.73303	4.78059	0.990814	0	1.77638	4.29624	0.409505	nan
CELF3	ENSCDRG00005014367	352.194	-0.520188	0.208563	-2.49415	0.0126257	0.270714	509.761	280.53	445.408	402.848	437.765	205.099	412.966	294.286	252.762	280.511	CUGBP Elav-like family member 3 [Source:HGNC Symbol;Acc:HGNC:11967]
MIDN	ENSCDRG00005012338	176.413	0.56714	0.227427	2.49372	0.0126411	0.270714	132.981	175.825	156.225	102.762	137.954	241.759	303.716	160.466	168.985	183.458	midnolin [Source:HGNC Symbol;Acc:HGNC:16298]
SLC39A8	ENSCDRG00005016965	60.2567	0.842393	0.337931	2.4928	0.0126741	0.270716	49.8679	45.4379	26.5915	67.779	26.6347	121.87	72.1052	52.6992	71.604	67.9777	solute carrier family 39 member 8 [Source:NCBI gene;Acc:105089557]
RASD1	ENSCDRG00005020491	20.16	0.955644	0.38333	2.493	0.0126667	0.270716	5.54088	15.8045	18.8356	12.5719	11.61	29.7244	39.3301	24.2771	16.4689	27.4368	ras related dexamethasone induced 1 [Source:NCBI gene;Acc:105100584]
LGR6	ENSCDRG00005019877	18.6408	-1.07365	0.43107	-2.49065	0.0127509	0.272002	22.1635	22.719	44.3192	17.4914	20.4882	14.8622	6.55502	12.4346	17.185	8.19009	leucine rich repeat containing G protein-coupled receptor 6 [Source:HGNC Symbol;Acc:HGNC:19719]
HSD17B2	ENSCDRG00005001133	8.33768	-2.07951	0.835666	-2.48844	0.0128304	0.27299	22.1635	7.90225	29.9154	3.82624	4.09765	0	4.37001	4.14488	5.72832	1.22851	hydroxysteroid 17-beta dehydrogenase 2 [Source:NCBI gene;Acc:105089442]
INSR	ENSCDRG00005016879	388.796	0.48115	0.193332	2.48872	0.0128205	0.27299	205.013	373.381	384.469	309.925	331.909	583.589	480.702	328.038	419.599	471.34	insulin receptor [Source:NCBI gene;Acc:105087555]
ENSCDRG00005001325	ENSCDRG00005001325	5.98796	1.78086	0.715856	2.48774	0.0128558	0.273177	0	4.93891	1.10798	3.27963	2.04882	10.899	17.4801	6.51338	5.01228	8.59959	nan
NECAB2	ENSCDRG00005001312	41.5482	-0.773749	0.311512	-2.48385	0.0129972	0.273357	66.4905	35.5601	58.7229	65.5926	36.8788	33.6877	32.7751	32.5669	34.3699	18.8372	N-terminal EF-hand calcium binding protein 2 [Source:HGNC Symbol;Acc:HGNC:23746]
TAFA5	ENSCDRG00005013773	67.4428	-0.56599	0.227697	-2.48572	0.0129291	0.273357	55.4088	81.9858	70.9107	88.55	102.441	46.5683	43.7001	65.1338	61.5794	58.1496	TAFA chemokine like family member 5 [Source:HGNC Symbol;Acc:HGNC:21592]
CACNB1	ENSCDRG00005003586	236.75	-0.45504	0.183182	-2.48409	0.0129883	0.273357	288.126	208.422	289.183	320.857	263.615	147.631	218.501	233.89	176.146	221.132	calcium voltage-gated channel auxiliary subunit beta 1 [Source:HGNC Symbol;Acc:HGNC:1401]
NAPB	ENSCDRG00005019640	485.686	-0.476777	0.191776	-2.48612	0.0129144	0.273357	504.22	486.976	567.285	654.286	613.964	269.501	338.676	512.781	409.575	499.596	NSF attachment protein beta [Source:HGNC Symbol;Acc:HGNC:15751]
CDHR2	ENSCDRG00005012323	32.08	-1.29488	0.520982	-2.48546	0.0129383	0.273357	99.7358	31.609	58.7229	21.8642	19.8053	3.96326	26.2201	26.6456	17.901	14.3327	cadherin related family member 2 [Source:NCBI gene;Acc:105099575]
COPE	ENSCDRG00005013441	217.848	0.33566	0.135084	2.48482	0.0129615	0.273357	210.553	194.593	187.248	209.896	168.003	248.694	225.056	258.167	227.701	248.569	coatomer protein complex subunit epsilon [Source:HGNC Symbol;Acc:HGNC:2234]
MFHAS1	ENSCDRG00005019131	123.309	0.492443	0.198113	2.48567	0.0129307	0.273357	132.981	106.68	94.1782	83.084	101.075	147.631	190.096	139.742	118.863	118.756	malignant fibrous histiocytoma amplified sequence 1 [Source:HGNC Symbol;Acc:HGNC:16982]
RALYL	ENSCDRG00005016728	125.006	-0.624944	0.25152	-2.48467	0.0129673	0.273357	166.226	120.509	116.338	231.761	125.661	70.3478	91.7703	127.899	98.8135	100.738	RALY RNA binding protein like [Source:NCBI gene;Acc:105088509]
ENSCDRG00005014813	ENSCDRG00005014813	5.53308	-2.98135	1.20066	-2.48309	0.013025	0.273591	27.7044	3.95112	14.4037	0	4.09765	0	0	1.18425	3.5802	0.409505	nan
GALNT9	ENSCDRG00005014837	33.8604	-0.77155	0.310802	-2.48245	0.0130484	0.273733	55.4088	53.3402	46.5351	27.8769	33.4641	24.7704	24.0351	21.9086	30.7897	20.4752	polypeptide N-acetylgalactosaminyltransferase 9 [Source:HGNC Symbol;Acc:HGNC:4131]
PTPRR	ENSCDRG00005018422	67.0302	-0.606511	0.24441	-2.48154	0.0130817	0.274083	72.0314	83.9614	85.3144	89.0966	76.4894	36.6601	39.3301	51.5149	63.0115	72.8918	protein tyrosine phosphatase receptor type R [Source:HGNC Symbol;Acc:HGNC:9680]
OR52W1	ENSCDRG00005016196	7.29303	-2.2399	0.905362	-2.47404	0.0133596	0.27928	38.7861	7.90225	3.32394	2.73303	10.2441	0	0	2.3685	4.29624	3.27604	olfactory receptor family 52 subfamily W member 1 [Source:HGNC Symbol;Acc:HGNC:15239]
GMPR	ENSCDRG00005016440	17.2494	-1.29396	0.52304	-2.47393	0.0133637	0.27928	44.327	24.6945	12.1878	16.9448	29.3665	10.899	0	11.2504	6.44436	16.3802	guanosine monophosphate reductase [Source:NCBI gene;Acc:105089104]
BNIP2	ENSCDRG00005010618	61.0992	0.527581	0.213397	2.47231	0.0134245	0.280084	55.4088	48.4013	47.6431	54.6605	45.757	72.3294	69.9202	62.7653	87.3568	66.7492	BCL2 interacting protein 2 [Source:NCBI gene;Acc:105088975]
MYH10	ENSCDRG00005015915	1062.12	-0.450759	0.182347	-2.47199	0.0134363	0.280084	1158.04	963.087	1279.72	1441.4	1283.25	651.956	1171.16	992.994	710.311	969.297	myosin heavy chain 10 [Source:NCBI gene;Acc:105098992]
PITPNM1	ENSCDRG00005010686	461.136	0.481708	0.194973	2.47064	0.0134872	0.280386	254.88	426.721	462.027	385.903	374.935	449.83	740.717	578.507	406.71	531.127	phosphatidylinositol transfer protein membrane associated 1 [Source:NCBI gene;Acc:105104419]
ADAMTS9	ENSCDRG00005020777	73.068	-0.575003	0.232693	-2.47108	0.0134705	0.280386	55.4088	106.68	109.69	86.9102	72.3917	62.4213	58.9952	65.7259	66.5917	45.8645	ADAM metallopeptidase with thrombospondin type 1 motif 9 [Source:HGNC Symbol;Acc:HGNC:13202]
LINGO3	ENSCDRG00005010016	8.17709	-1.46046	0.591218	-2.47025	0.0135019	0.280386	16.6226	6.91447	14.4037	11.4787	10.2441	4.95407	6.55502	1.18425	5.72832	3.68554	leucine rich repeat and Ig domain containing 3 [Source:HGNC Symbol;Acc:HGNC:21206]
KCNC2	ENSCDRG00005017383	109.475	0.505618	0.204766	2.46925	0.0135398	0.280818	72.0314	111.619	74.2346	91.8296	99.0264	106.017	113.62	132.044	128.887	165.44	potassium voltage-gated channel subfamily C member 2 [Source:HGNC Symbol;Acc:HGNC:6234]
FAM229A	ENSCDRG00005020612	8.89851	2.01227	0.815634	2.46712	0.0136205	0.281697	5.54088	1.97556	3.32394	1.09321	6.14647	12.8806	34.9601	7.10551	14.3208	1.63802	family with sequence similarity 229 member A [Source:HGNC Symbol;Acc:HGNC:44652]
BTG1	ENSCDRG00005021459	167.618	0.666289	0.270057	2.46722	0.0136168	0.281697	66.4905	110.631	111.906	200.057	148.198	183.301	135.47	191.257	249.182	279.692	BTG anti-proliferation factor 1 [Source:NCBI gene;Acc:105092208]
KBTBD12	ENSCDRG00005011561	11.7778	-1.31	0.531057	-2.46678	0.0136336	0.281697	33.2453	8.89003	17.7277	18.038	10.2441	4.95407	2.18501	8.88188	5.01228	8.59959	kelch repeat and BTB domain containing 12 [Source:NCBI gene;Acc:105090113]
TMEM87B	ENSCDRG00005009365	62.8838	0.565356	0.229238	2.46625	0.0136537	0.28176	72.0314	46.4257	45.4271	56.8469	40.2935	82.2376	74.2902	59.2125	70.1719	81.9009	transmembrane protein 87B [Source:HGNC Symbol;Acc:HGNC:25913]
MUS81	ENSCDRG00005018289	47.8432	0.687533	0.278983	2.46442	0.0137234	0.282064	44.327	36.5479	38.7793	26.7836	37.5618	67.3754	83.0303	48.5543	53.703	41.7695	MUS81 structure-specific endonuclease subunit [Source:NCBI gene;Acc:105102585]
SWAP70	ENSCDRG00005007968	84.6167	0.64737	0.262665	2.46462	0.0137157	0.282064	83.1132	68.1569	70.9107	56.3003	56.6841	134.751	93.9553	61.5811	133.899	86.815	switching B cell complex subunit SWAP70 [Source:NCBI gene;Acc:105086616]
PTP4A2	ENSCDRG00005020308	226.183	0.609528	0.247366	2.46407	0.013737	0.282064	66.4905	187.678	142.929	244.332	234.932	235.814	264.386	275.338	277.823	332.108	protein tyrosine phosphatase 4A2 [Source:NCBI gene;Acc:105085807]
ENSCDRG00005009970	ENSCDRG00005009970	17.5758	-1.67656	0.68007	-2.46528	0.0136907	0.282064	49.8679	20.7434	45.4271	11.4787	6.82941	1.98163	15.295	14.211	7.87644	2.04752	nan
ZNF792	ENSCDRG00005011807	58.9926	0.702631	0.285373	2.46215	0.0138108	0.283225	49.8679	57.2913	39.8873	33.3429	43.7082	76.2927	104.88	45.5937	80.9125	58.1496	zinc finger protein 792 [Source:NCBI gene;Acc:105088026]
PRUNE2	ENSCDRG00005012296	3348.17	-0.562129	0.228403	-2.46113	0.0138501	0.283678	3396.56	2490.2	4238.02	4892.66	4942.44	1744.82	2372.92	3698.42	2508.29	3197.41	prune homolog 2 with BCH domain [Source:HGNC Symbol;Acc:HGNC:25209]
SPON1	ENSCDRG00005017555	269.86	0.397263	0.161445	2.46068	0.0138676	0.283682	193.931	197.556	279.211	255.265	231.517	285.354	290.606	264.68	337.255	363.231	spondin 1 [Source:HGNC Symbol;Acc:HGNC:11252]
ENSCDRG00005001877	ENSCDRG00005001877	97.2823	-1.15826	0.470991	-2.45919	0.0139251	0.284504	343.534	108.656	122.986	42.6352	63.5135	45.5774	37.1451	68.0944	103.826	36.8554	nan
ENSCDRG00005018662	ENSCDRG00005018662	98.7577	0.903781	0.36758	2.45874	0.0139427	0.284511	55.4088	93.8392	63.1548	53.0207	76.4894	268.511	74.2902	83.4897	146.072	73.3013	linker for activation of T cells family member 2 [Source:NCBI gene;Acc:105089682]
GNPDA2	ENSCDRG00005003665	65.9263	0.720903	0.293308	2.45784	0.0139776	0.284869	49.8679	60.2546	26.5915	66.1392	47.1229	86.2008	45.8851	83.4897	105.258	88.453	glucosamine-6-phosphate deaminase 2 [Source:NCBI gene;Acc:105089314]
WNK2	ENSCDRG00005010400	744.564	-0.469876	0.19122	-2.45726	0.0140002	0.284977	975.195	718.117	1013.8	739.557	875.53	455.774	900.223	656.075	524.141	587.229	WNK lysine deficient protein kinase 2 [Source:HGNC Symbol;Acc:HGNC:14542]
ABLIM2	ENSCDRG00005001968	297.487	-0.421188	0.171495	-2.45598	0.0140502	0.285072	282.585	274.603	440.976	378.797	318.25	241.759	268.756	301.984	225.552	241.608	actin binding LIM protein family member 2 [Source:HGNC Symbol;Acc:HGNC:19195]
CAPZB	ENSCDRG00005007730	193.634	0.403885	0.164461	2.45581	0.0140569	0.285072	144.063	172.862	162.873	192.405	148.881	231.85	281.866	204.283	204.787	192.467	capping actin protein of muscle Z-line subunit beta [Source:NCBI gene;Acc:105103978]
SCMH1	ENSCDRG00005015060	103.865	-0.534282	0.217507	-2.45639	0.014034	0.285072	149.604	90.8759	144.037	102.762	134.539	83.2284	65.5502	90.0031	105.974	72.0728	Scm polycomb group protein homolog 1 [Source:NCBI gene;Acc:105103387]
SUSD3	ENSCDRG00005010096	18.5142	1.36617	0.556638	2.45432	0.0141152	0.285902	0	23.7067	9.97181	7.65247	6.14647	48.5499	37.1451	14.211	22.1972	15.5612	sushi domain containing 3 [Source:HGNC Symbol;Acc:HGNC:28391]
PNP	ENSCDRG00005001806	107.1	0.521756	0.212676	2.45329	0.0141555	0.286015	55.4088	81.9858	119.662	95.6559	75.8064	145.65	144.21	108.359	135.331	108.928	purine nucleoside phosphorylase [Source:HGNC Symbol;Acc:HGNC:7892]
C5AR1	ENSCDRG00005000922	39.4099	1.24966	0.509341	2.45349	0.0141477	0.286015	27.7044	33.5846	25.4835	12.5719	19.1223	144.659	30.5901	24.8693	47.2586	28.2558	complement C5a receptor 1 [Source:NCBI gene;Acc:105098917]
ENSCDRG00005017260	ENSCDRG00005017260	7.24718	-2.21539	0.903284	-2.4526	0.0141829	0.286215	38.7861	6.91447	8.86383	2.18642	5.46353	0.990814	0	1.18425	6.44436	1.63802	nan
NR4A1	ENSCDRG00005011894	84.8457	0.847884	0.345876	2.45141	0.0142298	0.28681	110.818	78.0347	32.1314	35.5293	58.7329	132.769	104.88	60.9889	88.7889	145.784	nuclear receptor subfamily 4 group A member 1 [Source:HGNC Symbol;Acc:HGNC:7980]
CYBB	ENSCDRG00005019198	90.7102	0.826405	0.337376	2.44951	0.0143051	0.287656	66.4905	57.2913	60.9389	77.6179	64.8794	226.896	69.9202	71.0551	134.615	77.3964	cytochrome b-245 heavy chain [Source:NCBI gene;Acc:105101594]
GAN	ENSCDRG00005000345	123.398	-0.489573	0.19987	-2.44946	0.0143072	0.287656	127.44	109.644	156.225	155.236	172.784	111.962	74.2902	117.833	93.0851	115.48	gigaxonin [Source:HGNC Symbol;Acc:HGNC:4137]
DUSP3	ENSCDRG00005013017	311.065	-0.418946	0.171066	-2.44903	0.0143242	0.287656	376.78	312.139	329.07	393.009	369.471	211.043	299.346	319.748	204.787	295.253	dual specificity phosphatase 3 [Source:NCBI gene;Acc:105101038]
IL18	ENSCDRG00005022350	20.9495	1.1829	0.483187	2.44813	0.0143601	0.288025	22.1635	9.87781	7.75585	10.9321	17.0735	58.458	13.11	21.3165	30.7897	18.0182	interleukin 18 [Source:NCBI gene;Acc:105094167]
SLC44A3	ENSCDRG00005001509	15.1672	-1.90813	0.779803	-2.44694	0.0144077	0.288627	77.5723	11.8534	24.3755	2.73303	4.78059	2.97244	13.11	4.14488	6.44436	3.68554	solute carrier family 44 member 3 [Source:HGNC Symbol;Acc:HGNC:28689]
ENSCDRG00005008935	ENSCDRG00005008935	8.15514	1.67766	0.686328	2.4444	0.0145095	0.28874	0	5.92669	1.10798	3.27963	6.14647	13.8714	26.2201	4.737	10.0246	10.2376	nan
DPPA2	ENSCDRG00005000221	6.29786	-2.87863	1.17716	-2.44541	0.0144689	0.28874	38.7861	2.96334	11.0798	0	4.09765	0	0	2.3685	2.86416	0.819009	developmental pluripotency associated 2 [Source:HGNC Symbol;Acc:HGNC:19197]
ALDH6A1	ENSCDRG00005000113	157.392	0.591694	0.242194	2.44305	0.0145636	0.28874	55.4088	116.558	113.014	171.087	157.759	172.402	135.47	220.271	219.824	212.123	aldehyde dehydrogenase 6 family member A1 [Source:NCBI gene;Acc:105086115]
DES	ENSCDRG00005001185	70.4083	-0.945026	0.386738	-2.44359	0.0145421	0.28874	66.4905	98.7781	75.3426	85.817	137.954	28.7336	17.4801	44.4094	102.394	46.6835	desmin [Source:NCBI gene;Acc:105096114]
CDHR3	ENSCDRG00005008337	13.5171	-2.16831	0.887916	-2.44202	0.0146053	0.28874	66.4905	12.8412	17.7277	1.09321	14.3418	0	4.37001	2.96063	12.8887	2.45703	cadherin related family member 3 [Source:NCBI gene;Acc:105093029]
ARHGAP9	ENSCDRG00005018474	85.3294	0.771207	0.315341	2.44563	0.01446	0.28874	94.1949	61.2424	86.4224	38.2624	41.6594	90.1641	174.801	94.7401	98.0974	73.7108	Rho GTPase activating protein 9 [Source:HGNC Symbol;Acc:HGNC:14130]
ENSCDRG00005011642	ENSCDRG00005011642	168.879	-0.524559	0.214763	-2.4425	0.014586	0.28874	227.176	127.424	206.084	232.307	208.98	105.026	126.73	153.361	126.023	175.677	nan
HSPB1	ENSCDRG00005007678	187.794	0.444308	0.181873	2.44296	0.0145675	0.28874	155.145	146.192	128.526	201.697	162.54	220.952	196.651	248.693	174.714	242.836	heat shock protein family B (small) member 1 [Source:NCBI gene;Acc:105089647]
LY9	ENSCDRG00005015023	50.4466	0.842953	0.344583	2.44629	0.0144333	0.28874	27.7044	43.4624	43.2112	31.7031	31.4153	98.0906	67.7352	47.37	83.0606	30.7128	lymphocyte antigen 9 [Source:NCBI gene;Acc:105100125]
LEPROTL1	ENSCDRG00005018877	187.546	0.59335	0.242956	2.44222	0.0145974	0.28874	88.6541	167.923	140.713	199.511	142.052	261.575	120.175	228.56	269.947	256.35	leptin receptor overlapping transcript like 1 [Source:NCBI gene;Acc:105095794]
ENSCDRG00005010585	ENSCDRG00005010585	16.8161	-1.35483	0.554803	-2.44199	0.0146064	0.28874	44.327	16.7923	42.1032	9.29229	12.2929	12.8806	2.18501	7.10551	12.1727	9.0091	nan
GALNT10	ENSCDRG00005001110	181.055	-0.453959	0.186123	-2.43903	0.0147267	0.290071	221.635	235.092	206.084	204.43	173.467	154.567	216.316	133.82	143.924	121.213	polypeptide N-acetylgalactosaminyltransferase 10 [Source:HGNC Symbol;Acc:HGNC:19873]
ADGRG1	ENSCDRG00005004615	290.314	0.364112	0.149275	2.4392	0.0147197	0.290071	249.34	252.872	304.694	243.239	215.809	336.877	382.376	338.104	287.848	291.977	adhesion G protein-coupled receptor G1 [Source:NCBI gene;Acc:105093810]
SRRM4	ENSCDRG00005017116	64.7035	-0.700494	0.287162	-2.43937	0.0147131	0.290071	77.5723	60.2546	118.554	60.6732	79.2211	36.6601	80.8453	43.8173	47.2586	42.179	serine/arginine repetitive matrix 4 [Source:HGNC Symbol;Acc:HGNC:29389]
DSG1	ENSCDRG00005016118	11.8967	-1.96184	0.804934	-2.43727	0.0147986	0.291139	22.1635	29.6334	38.7793	2.73303	2.73176	4.95407	0	6.51338	8.59248	2.86653	desmoglein 1 [Source:HGNC Symbol;Acc:HGNC:3048]
NRN1L	ENSCDRG00005015001	14.7657	-1.23265	0.505982	-2.43615	0.0148446	0.291348	22.1635	23.7067	32.1314	16.3982	10.2441	12.8806	6.55502	10.0661	2.86416	10.6471	neuritin 1 like [Source:NCBI gene;Acc:105088427]
ENSCDRG00005006121	ENSCDRG00005006121	15.5593	-1.29093	0.529816	-2.43655	0.0148279	0.291348	33.2453	27.6579	26.5915	16.3982	10.9271	7.92651	0	11.2504	6.44436	15.1517	nan
LZTS3	ENSCDRG00005008882	153.239	-0.557542	0.228904	-2.4357	0.0148628	0.291357	227.176	164.959	200.544	167.261	152.296	111.962	187.911	133.82	78.7644	107.7	leucine zipper tumor suppressor family member 3 [Source:HGNC Symbol;Acc:HGNC:30139]
DCBLD1	ENSCDRG00005002557	20.4755	0.865388	0.35565	2.43325	0.0149638	0.291944	16.6226	15.8045	15.5117	17.4914	8.19529	25.7612	26.2201	23.685	30.0737	25.3893	discoidin, CUB and LCCL domain containing 1 [Source:HGNC Symbol;Acc:HGNC:21479]
ENSCDRG00005005068	ENSCDRG00005005068	28.0963	-1.55835	0.640297	-2.43379	0.0149415	0.291944	94.1949	32.5968	66.4788	8.19908	9.56117	3.96326	28.4051	13.6189	12.8887	11.0566	nan
ENSCDRG00005021517	ENSCDRG00005021517	11.7571	-1.24166	0.510258	-2.43339	0.0149582	0.291944	5.54088	10.8656	31.0234	17.4914	16.3906	11.8898	4.37001	7.10551	7.1604	5.73306	nan
PLEKHM1	ENSCDRG00005006478	135.487	0.556636	0.228642	2.43453	0.0149111	0.291944	105.277	131.375	113.014	87.4568	107.222	202.126	209.761	125.531	162.541	110.566	pleckstrin homology and RUN domain containing M1 [Source:HGNC Symbol;Acc:HGNC:29017]
ENSCDRG00005019718	ENSCDRG00005019718	591.956	-0.565492	0.232524	-2.43198	0.0150167	0.292043	626.119	568.962	578.365	970.771	790.846	425.059	279.681	607.521	434.636	637.599	nan
SYCE1	ENSCDRG00005002331	9.77141	-2.59784	1.06821	-2.43196	0.0150176	0.292043	60.9497	11.8534	9.97181	0.546605	2.04882	0	2.18501	4.737	5.01228	0.409505	synaptonemal complex central element protein 1 [Source:HGNC Symbol;Acc:HGNC:28852]
LPAR6	ENSCDRG00005006495	16.9363	1.25168	0.514702	2.43185	0.0150221	0.292043	5.54088	17.7801	2.21596	10.9321	11.61	35.6693	15.295	15.9874	35.0859	19.2467	lysophosphatidic acid receptor 6 [Source:NCBI gene;Acc:105101802]
MAPK8IP1	ENSCDRG00005011734	573.072	-0.303421	0.124815	-2.43098	0.0150582	0.292399	664.905	629.217	688.055	595.8	586.646	469.646	607.432	550.085	447.525	491.405	mitogen-activated protein kinase 8 interacting protein 1 [Source:HGNC Symbol;Acc:HGNC:6882]
SYT7	ENSCDRG00005008063	221.251	-0.64011	0.263426	-2.42995	0.015101	0.292539	243.799	200.52	341.258	293.527	259.518	112.953	310.271	164.019	125.307	161.345	synaptotagmin 7 [Source:HGNC Symbol;Acc:HGNC:11514]
VPS9D1	ENSCDRG00005019863	106.085	-0.531197	0.21857	-2.43033	0.0150851	0.292539	160.685	111.619	150.685	107.681	99.7094	82.2376	113.62	90.0031	62.2954	82.3104	VPS9 domain containing 1 [Source:HGNC Symbol;Acc:HGNC:13526]
ENSCDRG00005014387	ENSCDRG00005014387	17.3941	-1.75264	0.721786	-2.42819	0.0151742	0.293479	72.0314	14.8167	28.8075	7.10587	12.9759	2.97244	13.11	7.69763	13.6048	0.819009	nan
ENSCDRG00005013556	ENSCDRG00005013556	16.5994	1.08562	0.447139	2.42793	0.0151852	0.293479	0	8.89003	7.75585	15.8515	15.0247	19.8163	26.2201	17.1716	22.9133	32.3509	nan
ENSCDRG00005015226	ENSCDRG00005015226	23.6249	-0.898143	0.370008	-2.42736	0.0152091	0.293596	44.327	40.499	23.2676	20.2244	30.0494	14.8622	8.74003	15.3953	22.9133	15.9707	nan
TNFRSF1B	ENSCDRG00005018060	179.91	0.746473	0.307668	2.42623	0.0152566	0.294168	105.277	163.972	168.413	111.507	116.783	350.748	290.606	115.464	247.75	128.584	TNF receptor superfamily member 1B [Source:HGNC Symbol;Acc:HGNC:11917]
TNFSF10	ENSCDRG00005011611	66.5303	0.777082	0.320449	2.42498	0.0153093	0.294493	27.7044	50.3768	35.4553	59.0333	66.2453	119.889	56.8102	55.0677	121.011	73.7108	TNF superfamily member 10 [Source:NCBI gene;Acc:105085942]
PDGFB	ENSCDRG00005013910	60.1521	0.73531	0.303206	2.42511	0.0153036	0.294493	49.8679	53.3402	44.3192	29.5167	48.4888	107.999	100.51	50.9228	60.8634	55.6926	platelet derived growth factor subunit B [Source:NCBI gene;Acc:105091934]
SNTB1	ENSCDRG00005021855	77.5213	-0.683568	0.281947	-2.42446	0.0153312	0.29457	88.6541	76.0591	62.0468	161.795	88.0994	51.5223	54.6252	60.3968	61.5794	70.4348	syntrophin beta 1 [Source:HGNC Symbol;Acc:HGNC:11168]
AHCYL2	ENSCDRG00005000196	402.84	0.470833	0.19427	2.4236	0.0153677	0.294927	232.717	271.64	311.342	434.004	424.789	439.921	386.746	457.713	490.487	579.039	adenosylhomocysteinase like 2 [Source:HGNC Symbol;Acc:HGNC:22204]
ARHGAP26	ENSCDRG00005007379	155.656	0.414199	0.170958	2.42281	0.0154009	0.295219	138.522	126.436	141.821	139.384	124.295	228.878	148.58	156.913	165.405	186.325	Rho GTPase activating protein 26 [Source:HGNC Symbol;Acc:HGNC:17073]
MYL10	ENSCDRG00005013332	7.40302	-2.48853	1.02776	-2.42132	0.0154641	0.295742	44.327	5.92669	9.97181	0	3.4147	0.990814	4.37001	2.3685	1.43208	1.22851	myosin light chain 10 [Source:NCBI gene;Acc:105092385]
BICDL2	ENSCDRG00005018583	8.80675	-2.08213	0.859854	-2.42149	0.0154571	0.295742	38.7861	2.96334	15.5117	2.18642	12.2929	1.98163	6.55502	2.3685	5.01228	0.409505	BICD family like cargo adaptor 2 [Source:HGNC Symbol;Acc:HGNC:33584]
ENSCDRG00005012524	ENSCDRG00005012524	12.4083	-1.13635	0.469468	-2.4205	0.015499	0.296065	16.6226	12.8412	27.6995	12.0253	16.3906	8.91733	6.55502	5.32913	10.7406	6.96158	nan
ENSCDRG00005000574	ENSCDRG00005000574	186.788	0.411271	0.170034	2.41876	0.0155735	0.296113	171.767	163.972	120.77	183.659	161.857	240.768	220.686	177.046	197.627	229.732	HECT and RLD domain containing E3 ubiquitin protein ligase 3 [Source:NCBI gene;Acc:105091565]
SH3TC1	ENSCDRG00005002064	118.524	0.770876	0.318629	2.41936	0.015548	0.296113	110.818	97.7903	75.3426	63.9528	92.197	236.805	209.761	78.1606	130.319	90.091	SH3 domain and tetratricopeptide repeats 1 [Source:HGNC Symbol;Acc:HGNC:26009]
ENSCDRG00005000565	ENSCDRG00005000565	129.401	0.550402	0.227459	2.41978	0.0155298	0.296113	94.1949	118.534	76.4506	127.359	107.905	151.595	109.25	169.348	128.887	210.485	nan
TGM5	ENSCDRG00005014574	12.8641	-1.71328	0.708214	-2.41916	0.0155565	0.296113	49.8679	12.8412	18.8356	2.18642	18.4394	7.92651	0	7.69763	7.1604	3.68554	transglutaminase 5 [Source:HGNC Symbol;Acc:HGNC:11781]
ENSCDRG00005013416	ENSCDRG00005013416	7.5699	-1.92642	0.796643	-2.41817	0.0155986	0.296248	33.2453	5.92669	14.4037	1.63982	6.14647	2.97244	4.37001	1.77638	3.5802	1.63802	nan
ABI3BP	ENSCDRG00005001958	39.7149	-1.11967	0.463344	-2.4165	0.0156707	0.296589	132.981	41.4868	53.183	26.237	24.5859	10.899	32.7751	19.5401	32.9378	22.5227	ABI family member 3 binding protein [Source:HGNC Symbol;Acc:HGNC:17265]
PRKG2	ENSCDRG00005002430	36.3888	-1.21814	0.50407	-2.41661	0.0156656	0.296589	121.899	32.5968	34.3474	47.008	27.3176	17.8347	2.18501	20.7244	21.4812	38.4934	protein kinase cGMP-dependent 2 [Source:NCBI gene;Acc:105091814]
TRAF3	ENSCDRG00005006052	184.277	0.369262	0.152779	2.41697	0.0156502	0.296589	116.358	177.801	146.253	168.354	179.613	238.786	214.131	197.77	202.639	201.067	TNF receptor associated factor 3 [Source:HGNC Symbol;Acc:HGNC:12033]
PPP2R1A	ENSCDRG00005000873	684.576	-0.306417	0.126852	-2.41555	0.0157115	0.29702	714.773	650.948	777.801	861.996	769.674	560.801	688.277	661.404	538.462	621.628	protein phosphatase 2 scaffold subunit Aalpha [Source:HGNC Symbol;Acc:HGNC:9302]
GZMA	ENSCDRG00005010264	5.6984	-2.69464	1.11653	-2.41341	0.0158042	0.297856	33.2453	5.92669	9.97181	0.546605	1.36588	0	0	2.96063	2.14812	0.819009	granzyme A-like [Source:NCBI gene;Acc:105087148]
DPF3	ENSCDRG00005005965	18.0872	-0.916809	0.379969	-2.41285	0.0158282	0.297856	16.6226	24.6945	33.2394	26.7836	16.3906	9.90814	10.925	15.3953	15.0368	11.8756	double PHD fingers 3 [Source:NCBI gene;Acc:105086255]
CDT1	ENSCDRG00005020480	16.1198	1.31065	0.543103	2.41325	0.0158108	0.297856	11.0818	8.89003	6.64788	8.19908	10.2441	17.8347	58.9952	13.6189	12.1727	13.5136	chromatin licensing and DNA replication factor 1 [Source:HGNC Symbol;Acc:HGNC:24576]
ADCY10	ENSCDRG00005005498	27.1842	-1.20569	0.499502	-2.41379	0.0157875	0.297856	66.4905	30.6212	60.9389	8.19908	25.9518	13.8714	21.8501	10.6583	13.6048	19.6562	adenylate cyclase 10 [Source:NCBI gene;Acc:105092727]
PROKR2	ENSCDRG00005008753	6.18709	-2.23204	0.92523	-2.41242	0.015847	0.29787	27.7044	4.93891	9.97181	0.546605	9.56117	2.97244	0	1.77638	3.5802	0.819009	prokineticin receptor 2 [Source:HGNC Symbol;Acc:HGNC:15836]
ENSCDRG00005017000	ENSCDRG00005017000	10.4342	-1.32575	0.549806	-2.41131	0.0158952	0.298434	16.6226	8.89003	18.8356	11.4787	16.3906	3.96326	15.295	3.55275	3.5802	5.73306	nan
ENSCDRG00005000003	ENSCDRG00005000003	7.71331	-2.10565	0.87348	-2.41064	0.0159244	0.298602	38.7861	2.96334	11.0798	2.18642	10.2441	3.96326	0	4.737	0.71604	2.45703	nan
ENSCDRG00005019921	ENSCDRG00005019921	24.0729	-1.68366	0.698534	-2.41028	0.0159404	0.298602	88.6541	40.499	42.1032	3.82624	11.61	2.97244	8.74003	14.8031	22.1972	5.32356	nan
HINT2	ENSCDRG00005004491	56.8925	0.623446	0.258813	2.40887	0.0160021	0.299417	38.7861	40.499	42.1032	46.4614	49.8547	64.4029	109.25	55.0677	53.703	68.7968	histidine triad nucleotide binding protein 2 [Source:NCBI gene;Acc:105102286]
SCARF1	ENSCDRG00005011199	85.222	0.841533	0.349677	2.4066	0.0161018	0.300597	72.0314	60.2546	75.3426	51.3809	47.1229	170.42	155.136	43.8173	106.69	70.0253	scavenger receptor class F member 1 [Source:HGNC Symbol;Acc:HGNC:16820]
PRKCD	ENSCDRG00005013096	56.4928	0.816234	0.339147	2.40673	0.0160962	0.300597	49.8679	44.4502	35.4553	27.8769	48.4888	103.045	83.0303	44.4094	90.221	38.0839	protein kinase C delta [Source:HGNC Symbol;Acc:HGNC:9399]
SPNS3	ENSCDRG00005010098	28.3188	1.15685	0.480886	2.40566	0.0161432	0.301028	16.6226	20.7434	18.8356	18.5846	10.9271	56.4764	74.2902	19.5401	33.6539	13.5136	sphingolipid transporter 3 (putative) [Source:HGNC Symbol;Acc:HGNC:28433]
ENSCDRG00005007857	ENSCDRG00005007857	96.4786	0.843203	0.350713	2.40426	0.0162054	0.301165	116.358	80.0103	48.7511	46.4614	62.1476	172.402	161.691	75.1999	146.072	55.6926	nan
GANAB	ENSCDRG00005005585	594.458	0.316361	0.13157	2.40451	0.0161942	0.301165	476.516	492.903	518.534	597.986	557.28	643.038	548.437	708.774	630.831	770.278	glucosidase II alpha subunit [Source:NCBI gene;Acc:105091491]
ERMP1	ENSCDRG00005005148	146.703	0.392282	0.163124	2.40481	0.0161809	0.301165	116.358	121.497	124.094	143.211	126.344	160.512	157.321	141.518	186.17	190.01	endoplasmic reticulum metallopeptidase 1 [Source:HGNC Symbol;Acc:HGNC:23703]
ITGB2	ENSCDRG00005021886	184.586	0.929473	0.386845	2.4027	0.0162745	0.301426	193.931	143.228	118.554	91.8296	96.2947	550.893	128.915	145.071	253.478	123.67	integrin subunit beta 2 [Source:HGNC Symbol;Acc:HGNC:6155]
SLC1A5	ENSCDRG00005000433	15.9168	-1.19926	0.499045	-2.40312	0.0162559	0.301426	0	24.6945	42.1032	25.1438	15.7076	14.8622	10.925	7.10551	7.1604	11.4661	solute carrier family 1 member 5 [Source:NCBI gene;Acc:105104032]
CTSC	ENSCDRG00005009321	62.8727	0.959854	0.39945	2.40294	0.0162639	0.301426	77.5723	45.4379	26.5915	53.5673	18.4394	141.686	74.2902	44.4094	90.221	56.5116	cathepsin C [Source:HGNC Symbol;Acc:HGNC:2528]
AIMP1	ENSCDRG00005013076	114.98	0.41271	0.171929	2.40047	0.0163741	0.301885	99.7358	87.9125	94.1782	106.041	101.758	110.971	161.691	122.57	136.764	128.175	aminoacyl tRNA synthetase complex interacting multifunctional protein 1 [Source:HGNC Symbol;Acc:HGNC:10648]
TLR10	ENSCDRG00005010269	34.1512	0.951965	0.396458	2.40118	0.0163424	0.301885	0	36.5479	15.5117	30.6099	23.9029	52.5131	65.5502	27.2378	51.5549	38.0839	toll like receptor 10 [Source:HGNC Symbol;Acc:HGNC:15634]
ENSCDRG00005007944	ENSCDRG00005007944	7.6993	1.56366	0.651282	2.40089	0.0163552	0.301885	5.54088	1.97556	4.43192	5.46605	2.04882	9.90814	21.8501	5.92125	12.8887	6.96158	GTPase IMAP family member 5-like [Source:NCBI gene;Acc:105105804]
SCML4	ENSCDRG00005009375	15.4002	-1.03738	0.432372	-2.39927	0.0164278	0.301885	33.2453	28.6457	15.5117	14.7583	15.0247	8.91733	6.55502	13.0268	9.30851	9.0091	Scm polycomb group protein like 4 [Source:NCBI gene;Acc:105097124]
CCKBR	ENSCDRG00005015928	9.43646	-1.71682	0.715041	-2.40102	0.0163496	0.301885	22.1635	9.87781	28.8075	6.01266	6.14647	0	6.55502	6.51338	5.01228	3.27604	cholecystokinin B receptor [Source:NCBI gene;Acc:105097920]
C9orf16	ENSCDRG00005010632	83.0213	-0.545022	0.227138	-2.39952	0.0164166	0.301885	110.818	80.0103	116.338	115.334	69.66	70.3478	83.0303	67.5023	56.5671	60.6067	chromosome 9 open reading frame 16 [Source:HGNC Symbol;Acc:HGNC:17823]
ACSBG1	ENSCDRG00005018776	31.4957	-0.804141	0.335103	-2.39968	0.0164092	0.301885	60.9497	26.6701	34.3474	29.5167	52.5865	26.752	19.6651	24.8693	23.6293	15.9707	acyl-CoA synthetase bubblegum family member 1 [Source:HGNC Symbol;Acc:HGNC:29567]
ENSCDRG00005000926	ENSCDRG00005000926	60.0756	0.920309	0.383712	2.39844	0.0164652	0.302236	44.327	56.3035	38.7793	38.809	28.6835	139.705	109.25	41.4488	63.7275	39.7219	nan
TRIP13	ENSCDRG00005013214	12.5163	-1.45707	0.607786	-2.39734	0.0165146	0.302468	55.4088	11.8534	6.64788	10.9321	12.2929	7.92651	2.18501	5.32913	6.44436	6.14257	thyroid hormone receptor interactor 13 [Source:HGNC Symbol;Acc:HGNC:12307]
LTBP2	ENSCDRG00005000468	134.976	0.632176	0.263684	2.39747	0.0165085	0.302468	149.604	66.1813	154.009	72.1519	96.2947	172.402	205.391	139.742	165.405	128.584	latent transforming growth factor beta binding protein 2 [Source:HGNC Symbol;Acc:HGNC:6715]
ENSCDRG00005001123	ENSCDRG00005001123	27.5269	0.928871	0.387813	2.39515	0.0166135	0.303941	0	20.7434	16.6197	26.237	23.9029	32.6969	32.7751	27.8299	35.0859	59.3782	nan
OR4K15	ENSCDRG00005002832	7.91971	-2.82104	1.17809	-2.39458	0.0166393	0.304073	55.4088	10.8656	2.21596	1.09321	1.36588	0.990814	0	2.96063	4.29624	0	olfactory receptor family 4 subfamily K member 15 [Source:HGNC Symbol;Acc:HGNC:15353]
KLHDC4	ENSCDRG00005008963	51.7669	0.9922	0.414702	2.39256	0.0167314	0.305417	11.0818	55.3157	31.0234	33.3429	33.4641	59.4488	148.58	33.159	65.1596	47.093	kelch domain containing 4 [Source:HGNC Symbol;Acc:HGNC:25272]
KDR	ENSCDRG00005002066	200.284	0.650788	0.272277	2.39017	0.0168408	0.305718	138.522	201.507	114.122	165.621	159.125	349.757	122.36	175.269	276.391	300.167	kinase insert domain receptor [Source:HGNC Symbol;Acc:HGNC:6307]
PNKD	ENSCDRG00005017602	168.567	-0.431505	0.180488	-2.39076	0.0168134	0.305718	282.585	161.008	187.248	173.274	176.882	121.87	170.431	125.531	141.06	145.784	PNKD metallo-beta-lactamase domain containing [Source:NCBI gene;Acc:105096077]
NALCN	ENSCDRG00005018707	297.922	-0.560693	0.234472	-2.3913	0.0167889	0.305718	421.107	228.177	327.962	468.441	338.056	179.337	185.726	295.471	212.664	322.28	sodium leak channel, non-selective [Source:HGNC Symbol;Acc:HGNC:19082]
WNT4	ENSCDRG00005014185	32.1142	-0.860416	0.35998	-2.39018	0.0168402	0.305718	33.2453	45.4379	22.1596	52.4741	47.8059	21.7979	41.5151	18.948	22.1972	15.5612	Wnt family member 4 [Source:HGNC Symbol;Acc:HGNC:12783]
ALKBH4	ENSCDRG00005008717	70.1083	-0.575033	0.240457	-2.39142	0.0167833	0.305718	99.7358	83.9614	101.934	65.5926	75.1235	71.3386	37.1451	62.1732	45.1105	58.9687	alkB homolog 4, lysine demethylase [Source:NCBI gene;Acc:105092378]
MTX1	ENSCDRG00005006745	13.1035	-1.76365	0.738053	-2.3896	0.0168667	0.30585	66.4905	7.90225	4.43192	7.65247	19.1223	5.94488	2.18501	5.32913	2.14812	9.82811	metaxin 1 [Source:HGNC Symbol;Acc:HGNC:7504]
SSTR1	ENSCDRG00005018396	5.62117	-1.96095	0.820792	-2.38909	0.01689	0.305936	5.54088	7.90225	5.5399	19.6778	6.82941	0.990814	0	5.32913	0.71604	3.68554	somatostatin receptor 1 [Source:HGNC Symbol;Acc:HGNC:11330]
EHD3	ENSCDRG00005014105	138.536	-0.460221	0.192681	-2.38851	0.0169167	0.306063	144.063	123.473	162.873	184.753	179.613	90.1641	148.58	126.715	117.43	107.7	EH domain containing 3 [Source:NCBI gene;Acc:105095593]
CBLN4	ENSCDRG00005017147	13.0791	-1.23669	0.517847	-2.38813	0.0169342	0.306063	27.7044	9.87781	17.7277	25.6904	14.3418	7.92651	0	11.2504	6.44436	9.82811	cerebellin 4 precursor [Source:NCBI gene;Acc:105098855]
UBP1	ENSCDRG00005012680	90.5402	0.52726	0.220905	2.38682	0.0169949	0.306822	38.7861	89.8881	79.7745	78.1645	75.1235	134.751	83.0303	92.9637	105.974	126.946	upstream binding protein 1 [Source:HGNC Symbol;Acc:HGNC:12507]
TMEM45A	ENSCDRG00005002081	11.7842	-1.87057	0.784386	-2.38476	0.0170903	0.307657	66.4905	13.8289	8.86383	3.27963	4.09765	5.94488	2.18501	4.14488	2.86416	6.14257	transmembrane protein 45A [Source:NCBI gene;Acc:105087727]
KCNT1	ENSCDRG00005002073	153.424	-0.451915	0.189492	-2.38488	0.0170849	0.307657	171.767	133.35	188.356	172.727	213.761	111.962	168.246	117.833	140.344	115.89	potassium sodium-activated channel subfamily T member 1 [Source:HGNC Symbol;Acc:HGNC:18865]
IRAK4	ENSCDRG00005003677	34.8024	0.806963	0.338404	2.38461	0.0170972	0.307657	38.7861	28.6457	16.6197	30.6099	15.0247	50.5315	61.1802	36.1197	36.518	33.9889	interleukin 1 receptor associated kinase 4 [Source:NCBI gene;Acc:105097094]
ENSCDRG00005001902	ENSCDRG00005001902	45.4362	0.730532	0.306467	2.38372	0.0171386	0.308064	11.0818	39.5112	27.6995	48.6478	33.4641	70.3478	72.1052	40.2645	52.2709	58.9687	nan
ENSCDRG00005001525	ENSCDRG00005001525	51.9607	0.599657	0.2517	2.38243	0.0171988	0.308471	44.327	32.5968	34.3474	43.1818	53.9523	72.3294	43.7001	60.3968	65.1596	69.6158	interferon related developmental regulator 1 [Source:NCBI gene;Acc:105085308]
ENPP3	ENSCDRG00005021842	12.4737	-2.08546	0.875215	-2.38279	0.0171819	0.308471	66.4905	18.7678	12.1878	1.09321	5.46353	4.95407	0	7.69763	6.44436	1.63802	ectonucleotide pyrophosphatase/phosphodiesterase 3 [Source:NCBI gene;Acc:105096341]
U8	ENSCDRG00005004321	6.13529	-2.59034	1.08802	-2.38078	0.0172762	0.309522	33.2453	6.91447	8.86383	2.18642	2.73176	4.95407	0	0	0	2.45703	U8 small nucleolar RNA [Source:RFAM;Acc:RF00096]
ENSCDRG00005005221	ENSCDRG00005005221	667.719	-0.349143	0.146715	-2.37974	0.0173247	0.309765	759.1	645.021	753.426	823.734	751.918	482.526	753.827	634.759	524.141	548.736	WW domain binding protein 2 [Source:NCBI gene;Acc:105105534]
CAPN8	ENSCDRG00005019102	20.2892	-1.26586	0.531944	-2.37969	0.0173274	0.309765	55.4088	29.6334	22.1596	12.5719	28.0006	14.8622	2.18501	5.32913	22.9133	9.82811	calpain 8 [Source:HGNC Symbol;Acc:HGNC:1485]
B3GALT5	ENSCDRG00005008464	18.3314	0.960178	0.403804	2.37783	0.0174147	0.310387	16.6226	11.8534	12.1878	10.9321	10.9271	27.7428	39.3301	19.5401	18.617	15.5612	beta-1,3-galactosyltransferase 5 [Source:NCBI gene;Acc:105099563]
ST8SIA4	ENSCDRG00005008300	27.8735	0.887446	0.373261	2.37755	0.0174283	0.310387	5.54088	18.7678	26.5915	15.8515	23.9029	41.6142	61.1802	26.6456	25.0614	33.5794	ST8 alpha-N-acetyl-neuraminide alpha-2,8-sialyltransferase 4 [Source:NCBI gene;Acc:105103184]
ENSCDRG00005010410	ENSCDRG00005010410	9.9936	-4.57561	1.925	-2.37695	0.0174566	0.310387	88.6541	0	4.43192	0	3.4147	0	0	1.18425	1.43208	0.819009	nan
DNM2	ENSCDRG00005008985	399.888	0.43544	0.183176	2.37717	0.0174462	0.310387	315.83	377.332	296.938	314.845	385.179	557.828	592.137	396.132	426.044	336.613	dynamin 2 [Source:HGNC Symbol;Acc:HGNC:2974]
PRR36	ENSCDRG00005014132	75.7422	-0.907376	0.381547	-2.37815	0.0173999	0.310387	116.358	112.607	137.389	54.1139	69.66	31.706	115.805	45.5937	42.2463	31.9414	proline rich 36 [Source:HGNC Symbol;Acc:HGNC:26172]
PLPP5	ENSCDRG00005014397	34.4592	0.838347	0.352848	2.37594	0.0175043	0.3109	44.327	30.6212	15.5117	18.038	21.1712	55.4856	58.9952	37.3039	33.6539	29.4843	phospholipid phosphatase 5 [Source:NCBI gene;Acc:105089933]
AMHR2	ENSCDRG00005005034	9.39119	-1.82086	0.766592	-2.37526	0.0175365	0.311136	27.7044	19.7556	18.8356	1.09321	6.82941	2.97244	4.37001	3.55275	7.1604	1.63802	anti-Mullerian hormone receptor type 2 [Source:HGNC Symbol;Acc:HGNC:465]
CD22	ENSCDRG00005006580	23.9187	-1.33869	0.563853	-2.37419	0.0175877	0.311707	77.5723	38.5235	29.9154	9.83889	19.1223	5.94488	15.295	16.5795	21.4812	4.91405	CD22 molecule [Source:HGNC Symbol;Acc:HGNC:1643]
SIN3B	ENSCDRG00005021342	297.15	-0.387278	0.163158	-2.37364	0.0176136	0.311831	299.207	285.469	361.201	393.009	332.592	221.942	332.121	275.338	249.898	220.723	SIN3 transcription regulator family member B [Source:HGNC Symbol;Acc:HGNC:19354]
SPRY2	ENSCDRG00005012396	36.879	0.765141	0.32244	2.37297	0.0176456	0.311881	11.0818	24.6945	33.2394	19.6778	40.9765	41.6142	61.1802	35.5275	50.8388	49.9596	sprouty RTK signaling antagonist 2 [Source:NCBI gene;Acc:105103275]
ENSCDRG00005010343	ENSCDRG00005010343	8.84117	-1.94172	0.81833	-2.37279	0.0176544	0.311881	44.327	7.90225	12.1878	2.18642	6.82941	3.96326	0	6.51338	2.86416	1.63802	nan
ROBO1	ENSCDRG00005003786	181.442	-0.464829	0.196011	-2.37144	0.0177189	0.312442	238.258	182.74	169.521	243.239	224.688	110.971	137.655	186.52	141.06	179.772	roundabout guidance receptor 1 [Source:HGNC Symbol;Acc:HGNC:10249]
FANCM	ENSCDRG00005019818	68.646	-0.578797	0.244251	-2.36968	0.0178035	0.312442	77.5723	80.9981	75.3426	93.4695	85.3676	53.504	37.1451	80.5291	58.7152	43.817	FA complementation group M [Source:NCBI gene;Acc:105086459]
ENSCDRG00005001458	ENSCDRG00005001458	37.5267	1.30617	0.55105	2.37033	0.017772	0.312442	11.0818	22.719	26.5915	1.63982	43.7082	65.3937	41.5151	35.5275	73.036	54.0546	serpin family A member 3 [Source:NCBI gene;Acc:105095569]
SLC8A1	ENSCDRG00005018497	342.926	-0.404292	0.170634	-2.36936	0.0178191	0.312442	260.421	363.503	425.464	441.657	452.107	299.226	225.056	299.023	342.983	319.823	solute carrier family 8 member A1 [Source:HGNC Symbol;Acc:HGNC:11068]
MKKS	ENSCDRG00005006576	130.526	-0.540681	0.228064	-2.37074	0.0177525	0.312442	166.226	123.473	119.662	202.244	164.589	81.2468	98.3253	135.597	87.3568	126.537	McKusick-Kaufman syndrome [Source:NCBI gene;Acc:105101220]
MICALL2	ENSCDRG00005017880	213.501	0.641209	0.270607	2.36952	0.0178112	0.312442	177.308	169.898	187.248	144.85	152.979	323.005	386.746	124.938	282.12	185.915	MICAL like 2 [Source:HGNC Symbol;Acc:HGNC:29672]
OR6Y1	ENSCDRG00005009427	7.02137	-1.77291	0.747967	-2.37031	0.0177731	0.312442	16.6226	13.8289	9.97181	3.82624	9.56117	0.990814	6.55502	1.18425	6.44436	1.22851	olfactory receptor 6Y1 [Source:NCBI gene;Acc:105086546]
ENSCDRG00005008334	ENSCDRG00005008334	104.269	-0.537513	0.22695	-2.36842	0.0178644	0.312903	177.308	85.937	135.173	127.359	96.9776	81.2468	111.435	81.1212	68.7398	77.3964	nan
MEP1B	ENSCDRG00005014313	6.3645	-2.4926	1.05288	-2.36741	0.0179132	0.313424	27.7044	10.8656	14.4037	0.546605	2.04882	0	0	2.96063	4.29624	0.819009	meprin A subunit beta [Source:NCBI gene;Acc:105087045]
AGA	ENSCDRG00005021201	86.6555	0.772094	0.326359	2.36578	0.017992	0.314135	27.7044	84.9492	27.6995	77.6179	93.5629	118.898	80.8453	111.912	101.678	141.689	aspartylglucosaminidase [Source:HGNC Symbol;Acc:HGNC:318]
CCDC153	ENSCDRG00005020845	8.04213	-2.25117	0.951551	-2.36579	0.0179917	0.314135	44.327	8.89003	13.2958	1.09321	1.36588	3.96326	0	2.3685	1.43208	3.68554	coiled-coil domain containing 153 [Source:NCBI gene;Acc:105090142]
MAPKAPK2	ENSCDRG00005009827	103.522	0.520181	0.219994	2.36453	0.0180531	0.314533	94.1949	84.9492	85.3144	78.1645	85.3676	182.31	104.88	109.543	113.85	96.6431	MAPK activated protein kinase 2 [Source:HGNC Symbol;Acc:HGNC:6887]
ENSCDRG00005011721	ENSCDRG00005011721	11.2506	-1.12725	0.476698	-2.36471	0.0180444	0.314533	11.0818	16.7923	13.2958	23.504	10.9271	8.91733	8.74003	5.32913	5.72832	8.19009	nan
NOP10	ENSCDRG00005002581	42.6597	0.591671	0.250332	2.36355	0.0181009	0.315032	27.7044	30.6212	38.7793	42.0886	28.6835	52.5131	45.8851	56.2519	56.5671	47.5025	NOP10 ribonucleoprotein [Source:NCBI gene;Acc:105089974]
REELD1	ENSCDRG00005020091	7.98308	-2.49628	1.05679	-2.36214	0.0181697	0.315895	38.7861	9.87781	14.4037	4.37284	2.04882	0	0	5.32913	5.01228	0	reeler domain containing 1 [Source:HGNC Symbol;Acc:HGNC:53638]
PIGR	ENSCDRG00005009102	13.3645	-1.77212	0.750364	-2.36167	0.0181927	0.315961	66.4905	12.8412	13.2958	3.27963	8.87823	4.95407	13.11	4.14488	5.01228	1.63802	polymeric immunoglobulin receptor [Source:NCBI gene;Acc:105098607]
CTNNBL1	ENSCDRG00005019014	160.128	-0.410658	0.173923	-2.36114	0.0182188	0.316081	221.635	189.654	178.385	188.579	141.369	121.87	157.321	152.768	114.566	135.136	catenin beta like 1 [Source:HGNC Symbol;Acc:HGNC:15879]
TTC29	ENSCDRG00005019850	5.56904	-1.78115	0.754895	-2.35947	0.0183011	0.316383	5.54088	8.89003	19.9436	4.91945	4.78059	1.98163	0	2.3685	3.5802	3.68554	tetratricopeptide repeat domain 29 [Source:NCBI gene;Acc:105091224]
PIWIL4	ENSCDRG00005015533	11.4688	-1.77283	0.751448	-2.35922	0.0183132	0.316383	44.327	11.8534	23.2676	1.63982	10.2441	4.95407	2.18501	4.14488	10.0246	2.04752	piwi like RNA-mediated gene silencing 4 [Source:NCBI gene;Acc:105096540]
EEF1A2	ENSCDRG00005009396	1940.19	-0.472984	0.200452	-2.35959	0.018295	0.316383	2039.04	1651.57	2552.78	2769.65	2257.12	1011.62	2023.32	1866.38	1467.88	1762.51	eukaryotic translation elongation factor 1 alpha 2 [Source:HGNC Symbol;Acc:HGNC:3192]
ENSCDRG00005007082	ENSCDRG00005007082	8.19967	-2.2137	0.937927	-2.3602	0.018265	0.316383	33.2453	11.8534	16.6197	0	7.51235	2.97244	0	3.55275	5.01228	1.22851	nan
LIPM	ENSCDRG00005007263	7.19481	-2.49806	1.05935	-2.35811	0.0183683	0.31667	38.7861	8.89003	5.5399	2.18642	7.51235	0	0	4.737	4.29624	0	lipase family member M [Source:HGNC Symbol;Acc:HGNC:23455]
SEMA4D	ENSCDRG00005016903	397.435	-0.421666	0.178798	-2.35834	0.0183571	0.31667	559.629	547.231	436.544	373.878	362.642	350.748	439.186	313.827	295.008	295.662	semaphorin 4D [Source:HGNC Symbol;Acc:HGNC:10732]
EGR3	ENSCDRG00005015507	12.038	-1.55587	0.65997	-2.35749	0.0183991	0.316869	44.327	17.7801	13.2958	6.01266	9.56117	5.94488	10.925	4.14488	7.1604	1.22851	early growth response 3 [Source:HGNC Symbol;Acc:HGNC:3240]
ENSCDRG00005016954	ENSCDRG00005016954	78.6782	0.49779	0.211347	2.35533	0.0185065	0.318385	72.0314	67.1691	49.8591	77.6179	60.7817	107.008	89.5853	82.3054	78.0483	102.376	nan
C5orf15	ENSCDRG00005003097	70.2915	0.651651	0.276731	2.35482	0.0185319	0.318489	105.277	36.5479	40.9952	60.6732	45.757	67.3754	80.8453	94.7401	71.604	99.1001	chromosome unknown open reading frame, human C5orf15 [Source:NCBI gene;Acc:105090232]
GALNT18	ENSCDRG00005019515	45.101	-0.791576	0.336368	-2.3533	0.0186076	0.319457	88.6541	29.6334	60.9389	68.8722	40.9765	18.8255	43.7001	31.9748	37.9501	29.4843	polypeptide N-acetylgalactosaminyltransferase 18 [Source:HGNC Symbol;Acc:HGNC:30488]
COMMD9	ENSCDRG00005014454	84.4159	-0.571305	0.24285	-2.3525	0.0186477	0.319811	138.522	75.0714	111.906	69.4188	114.051	67.3754	83.0303	72.8314	55.8511	56.1021	COMM domain containing 9 [Source:NCBI gene;Acc:105106819]
HAPLN1	ENSCDRG00005016491	17.8436	-1.01342	0.430965	-2.35151	0.0186974	0.320329	38.7861	18.7678	28.8075	22.4108	12.9759	4.95407	15.295	13.6189	12.1727	10.6471	hyaluronan and proteoglycan link protein 1 [Source:NCBI gene;Acc:105090666]
ENSCDRG00005020786	ENSCDRG00005020786	18.7826	-1.76542	0.751044	-2.35063	0.0187419	0.320757	83.1132	16.7923	29.9154	1.09321	16.3906	7.92651	10.925	8.88188	10.7406	2.04752	nan
ENSCDRG00005000997	ENSCDRG00005000997	7.35593	-2.57679	1.09705	-2.34883	0.0188323	0.321064	44.327	4.93891	8.86383	0	5.46353	0.990814	4.37001	0	2.14812	2.45703	nan
TRPM6	ENSCDRG00005000352	125.132	0.734279	0.312551	2.34931	0.0188085	0.321064	105.277	105.693	88.6383	92.9229	79.2211	300.217	131.1	77.5684	128.171	142.508	transient receptor potential cation channel subfamily M member 6 [Source:HGNC Symbol;Acc:HGNC:17995]
AIF1	ENSCDRG00005020227	34.7416	0.869706	0.37013	2.34973	0.0187871	0.321064	22.1635	35.5601	19.9436	25.1438	19.8053	77.2835	26.2201	34.9354	54.419	31.9414	allograft inflammatory factor 1 [Source:NCBI gene;Acc:105087470]
YWHAH	ENSCDRG00005009047	940.191	-0.40484	0.172366	-2.34872	0.0188379	0.321064	1052.77	815.907	1119.06	1255.01	1117.97	672.763	659.872	1008.39	729.644	970.526	tyrosine 3-monooxygenase/tryptophan 5-monooxygenase activation protein eta [Source:HGNC Symbol;Acc:HGNC:12853]
SESN3	ENSCDRG00005016152	456.982	0.52764	0.224704	2.34816	0.0188665	0.321219	271.503	497.842	265.915	430.725	398.155	605.387	323.381	534.689	627.967	614.257	sestrin 3 [Source:NCBI gene;Acc:105102880]
TKT	ENSCDRG00005013181	566.99	-0.29527	0.125804	-2.34706	0.0189221	0.321833	592.874	627.241	606.065	677.79	616.696	420.105	517.847	600.415	488.339	522.528	transketolase [Source:HGNC Symbol;Acc:HGNC:11834]
MTTP	ENSCDRG00005018066	28.4652	-1.42981	0.609505	-2.34586	0.0189832	0.322537	5.54088	25.6823	55.399	88.0034	30.7323	0.990814	19.6651	24.8693	18.617	15.1517	microsomal triglyceride transfer protein [Source:NCBI gene;Acc:105089547]
DLGAP3	ENSCDRG00005021185	132.032	-0.428748	0.18287	-2.34455	0.0190499	0.323338	182.849	131.375	149.577	145.944	147.515	112.953	148.58	95.3322	115.282	90.91	DLG associated protein 3 [Source:HGNC Symbol;Acc:HGNC:30368]
IGSF10	ENSCDRG00005016817	39.6521	-1.026	0.437803	-2.34351	0.0191032	0.32346	94.1949	57.2913	60.9389	13.1185	46.44	22.7887	15.295	22.5008	39.3822	24.5703	immunoglobulin superfamily member 10 [Source:NCBI gene;Acc:105094656]
GEMIN7	ENSCDRG00005006771	12.3943	1.7152	0.73221	2.3425	0.019155	0.32346	0	4.93891	7.75585	2.73303	10.2441	33.6877	43.7001	5.32913	8.59248	6.96158	gem nuclear organelle associated protein 7 [Source:NCBI gene;Acc:105095463]
PPFIA2	ENSCDRG00005005786	243.865	-0.561282	0.239546	-2.34311	0.0191239	0.32346	238.258	188.666	340.15	390.823	293.665	133.76	176.986	260.535	178.294	237.513	PTPRF interacting protein alpha 2 [Source:HGNC Symbol;Acc:HGNC:9246]
ENSCDRG00005010726	ENSCDRG00005010726	6.10776	-1.80292	0.769452	-2.34312	0.0191231	0.32346	16.6226	3.95112	18.8356	3.82624	6.14647	1.98163	0	2.96063	4.29624	2.45703	family with sequence similarity 72 member A [Source:NCBI gene;Acc:105098616]
PTPDC1	ENSCDRG00005017136	121.539	-0.400795	0.171098	-2.34249	0.0191555	0.32346	116.358	162.984	146.253	127.359	136.588	97.0998	100.51	112.504	94.5172	121.213	protein tyrosine phosphatase domain containing 1 [Source:HGNC Symbol;Acc:HGNC:30184]
DIRAS1	ENSCDRG00005008559	44.4649	-0.741453	0.316653	-2.34153	0.0192049	0.323962	77.5723	45.4379	53.183	50.2877	57.367	18.8255	28.4051	53.2913	25.0614	35.2174	DIRAS family GTPase 1 [Source:NCBI gene;Acc:105106056]
TTN	ENSCDRG00005003286	1623.5	0.558327	0.238629	2.33973	0.0192977	0.325193	1196.83	1672.31	1069.2	1440.3	1186.95	2584.04	1193.01	1249.98	1957.65	2684.71	titin [Source:HGNC Symbol;Acc:HGNC:12403]
GPC3	ENSCDRG00005014241	19.1279	-1.13014	0.483204	-2.33885	0.0193433	0.325629	55.4088	11.8534	16.6197	23.504	29.3665	6.9357	6.55502	8.28976	17.185	15.5612	glypican 3 [Source:HGNC Symbol;Acc:HGNC:4451]
SLC25A22	ENSCDRG00005009060	223.291	-0.50764	0.217108	-2.33819	0.0193772	0.325866	393.402	170.886	271.455	235.04	250.639	143.668	235.981	196.586	160.393	174.858	solute carrier family 25 member 22 [Source:HGNC Symbol;Acc:HGNC:19954]
ENSCDRG00005012656	ENSCDRG00005012656	19.9972	-1.69687	0.726481	-2.33574	0.0195047	0.327675	83.1132	8.89003	39.8873	8.19908	12.9759	1.98163	26.2201	8.88188	5.72832	4.09505	nan
HHAT	ENSCDRG00005019106	25.8854	-0.8584	0.367631	-2.33495	0.019546	0.328034	38.7861	27.6579	54.291	22.9574	24.5859	21.7979	17.4801	13.0268	21.4812	16.7897	hedgehog acyltransferase [Source:NCBI gene;Acc:105099322]
STPG4	ENSCDRG00005022325	7.04122	-2.24442	0.961444	-2.33442	0.0195737	0.328163	38.7861	7.90225	1.10798	1.09321	11.61	1.98163	0	4.14488	2.14812	1.63802	sperm-tail PG-rich repeat containing 4 [Source:HGNC Symbol;Acc:HGNC:26850]
MBOAT7	ENSCDRG00005002900	239.171	-0.442357	0.189539	-2.33385	0.0196036	0.32833	349.075	236.08	325.746	247.612	231.517	144.659	198.836	247.508	196.911	213.761	membrane bound O-acyltransferase domain containing 7 [Source:HGNC Symbol;Acc:HGNC:15505]
ZNF536	ENSCDRG00005021564	163.24	-0.379048	0.162528	-2.33221	0.0196899	0.32944	132.981	218.3	192.788	194.045	172.101	128.806	159.506	141.518	159.677	132.679	zinc finger protein 536 [Source:HGNC Symbol;Acc:HGNC:29025]
ASTE1	ENSCDRG00005000027	52.4188	0.695691	0.298399	2.33141	0.0197316	0.329468	27.7044	37.5357	46.5351	42.0886	38.2447	53.504	117.99	49.1464	59.4313	52.0071	asteroid homolog 1 [Source:HGNC Symbol;Acc:HGNC:25021]
TMEM168	ENSCDRG00005001569	44.5694	0.621461	0.266539	2.33159	0.0197223	0.329468	33.2453	40.499	27.6995	45.9148	28.0006	53.504	45.8851	59.8047	47.2586	63.8827	transmembrane protein 168 [Source:NCBI gene;Acc:105085310]
DPP6	ENSCDRG00005013198	382.415	-0.508069	0.218006	-2.33053	0.0197781	0.329793	476.516	337.821	470.891	487.572	468.497	207.08	467.592	317.971	235.577	354.631	dipeptidyl peptidase like 6 [Source:HGNC Symbol;Acc:HGNC:3010]
ENSCDRG00005004746	ENSCDRG00005004746	427.707	-0.417777	0.179282	-2.33028	0.0197912	0.329793	520.843	385.235	618.252	483.745	438.448	276.437	445.741	416.264	318.638	373.468	mitogen-activated protein kinase kinase 2 [Source:NCBI gene;Acc:105105302]
PTPRF	ENSCDRG00005008697	702.756	-0.467843	0.200982	-2.32779	0.0199235	0.331661	1025.06	656.874	875.304	698.015	824.31	511.26	889.298	605.152	472.586	469.702	protein tyrosine phosphatase receptor type F [Source:NCBI gene;Acc:105090904]
AMER1	ENSCDRG00005012630	44.9825	-0.624314	0.268256	-2.3273	0.0199491	0.331752	55.4088	42.4746	67.5867	66.6858	40.9765	30.7152	34.9601	39.0803	40.8143	31.1223	APC membrane recruitment protein 1 [Source:NCBI gene;Acc:105089083]
MYO1F	ENSCDRG00005008914	168.35	0.815151	0.350328	2.32682	0.0199747	0.331843	110.818	198.544	130.742	84.1772	84.0017	394.344	235.981	116.649	209.084	119.166	myosin IF [Source:HGNC Symbol;Acc:HGNC:7600]
TBC1D16	ENSCDRG00005018816	79.42	0.650756	0.27982	2.32562	0.0200386	0.332569	60.9497	64.2058	65.3708	38.2624	77.1723	88.1825	157.321	80.5291	70.8879	91.3195	TBC1 domain family member 16 [Source:HGNC Symbol;Acc:HGNC:28356]
DHX8	ENSCDRG00005012511	181.387	0.409659	0.17622	2.3247	0.020088	0.333052	121.899	166.935	140.713	200.057	138.637	247.704	203.206	184.151	197.627	212.942	DEAH-box helicase 8 [Source:HGNC Symbol;Acc:HGNC:2749]
FBXO46	ENSCDRG00005010007	31.1629	-0.798115	0.343453	-2.32379	0.0201365	0.333417	49.8679	37.5357	40.9952	29.5167	43.0253	37.6509	13.11	26.0535	15.0368	18.8372	F-box protein 46 [Source:HGNC Symbol;Acc:HGNC:25069]
RNF157	ENSCDRG00005004048	235.726	-0.390943	0.168254	-2.32353	0.0201505	0.333417	310.289	222.251	274.779	269.476	260.883	157.539	273.126	194.217	194.047	200.657	ring finger protein 157 [Source:HGNC Symbol;Acc:HGNC:29402]
GRIN2D	ENSCDRG00005001886	41.8781	-0.709455	0.305499	-2.32229	0.0202175	0.334115	77.5723	44.4502	58.7229	44.275	37.5618	23.7795	43.7001	24.8693	40.0982	23.7513	glutamate ionotropic receptor NMDA type subunit 2D [Source:HGNC Symbol;Acc:HGNC:4588]
RRBP1	ENSCDRG00005004353	408.118	0.487131	0.20979	2.32199	0.0202334	0.334115	337.994	363.503	427.68	247.612	318.933	576.654	651.132	374.223	409.575	373.878	ribosome binding protein 1 [Source:HGNC Symbol;Acc:HGNC:10448]
TCEA2	ENSCDRG00005012367	197.703	-0.408628	0.176039	-2.32123	0.0202744	0.334456	238.258	220.275	171.737	260.731	232.2	147.631	216.316	185.335	154.665	149.879	transcription elongation factor A2 [Source:HGNC Symbol;Acc:HGNC:11614]
ENSCDRG00005010589	ENSCDRG00005010589	7.30662	-2.29058	0.987034	-2.32067	0.0203049	0.334623	44.327	4.93891	7.75585	1.09321	4.78059	2.97244	0	1.77638	5.01228	0.409505	uricase-like [Source:NCBI gene;Acc:105095038]
ENSCDRG00005006509	ENSCDRG00005006509	8.88031	-2.43097	1.04831	-2.31894	0.0203986	0.335495	55.4088	8.89003	6.64788	0	6.14647	1.98163	0	5.32913	3.5802	0.819009	nan
ENSCDRG00005008955	ENSCDRG00005008955	495.929	0.350884	0.151299	2.31914	0.0203874	0.335495	326.912	405.978	455.379	522.008	448.009	505.315	638.022	576.138	466.858	614.666	golgin A2 [Source:NCBI gene;Acc:105092580]
QDPR	ENSCDRG00005019647	271.387	-0.481564	0.207973	-2.31551	0.0205851	0.336261	343.534	302.261	214.948	378.251	343.519	179.337	246.906	296.063	171.133	237.922	quinoid dihydropteridine reductase [Source:NCBI gene;Acc:105098345]
OCA2	ENSCDRG00005002261	24.6804	-0.89571	0.386683	-2.3164	0.0205367	0.336261	44.327	23.7067	36.5633	32.2497	29.3665	13.8714	4.37001	24.2771	14.3208	23.7513	OCA2 melanosomal transmembrane protein [Source:HGNC Symbol;Acc:HGNC:8101]
NECTIN2	ENSCDRG00005006156	114.489	0.651523	0.281371	2.31553	0.0205839	0.336261	138.522	82.9736	87.5304	65.5926	79.9041	175.374	183.541	79.9369	156.097	95.4146	nectin cell adhesion molecule 2 [Source:NCBI gene;Acc:105095468]
ENSCDRG00005001919	ENSCDRG00005001919	95.3717	0.648428	0.280137	2.31468	0.0206303	0.336261	66.4905	85.937	44.3192	78.7111	93.5629	182.31	91.7703	85.2661	98.8135	126.537	nan
SLC35E2B	ENSCDRG00005010849	437.472	-0.305143	0.131768	-2.31576	0.0205713	0.336261	515.302	496.854	478.647	482.652	458.253	406.234	294.976	449.423	384.513	407.866	solute carrier family 35 member E2B [Source:NCBI gene;Acc:105105560]
DPYSL5	ENSCDRG00005013299	359.244	-0.478641	0.206719	-2.31542	0.0205899	0.336261	343.534	394.125	396.657	472.813	476.01	177.356	371.451	380.145	267.083	313.271	dihydropyrimidinase like 5 [Source:NCBI gene;Acc:105098522]
RGL2	ENSCDRG00005021678	204.566	0.427048	0.18436	2.31638	0.0205374	0.336261	193.931	181.752	182.817	156.876	160.491	315.079	242.536	176.453	230.565	205.162	ral guanine nucleotide dissociation stimulator like 2 [Source:HGNC Symbol;Acc:HGNC:9769]
TREM2	ENSCDRG00005016557	108.431	0.801692	0.346377	2.31451	0.0206399	0.336261	94.1949	112.607	48.7511	68.8722	73.7576	257.612	98.3253	88.8188	161.109	80.2629	triggering receptor expressed on myeloid cells 2 [Source:NCBI gene;Acc:105086745]
KCNV1	ENSCDRG00005021422	10.9557	-2.27215	0.980749	-2.31675	0.0205175	0.336261	77.5723	6.91447	2.21596	3.82624	3.4147	1.98163	0	7.69763	4.29624	1.63802	potassium voltage-gated channel modifier subfamily V member 1 [Source:NCBI gene;Acc:105093299]
PRKAR1B	ENSCDRG00005018560	138.744	-0.582524	0.251703	-2.31433	0.0206496	0.336261	177.308	160.021	147.361	186.939	155.028	70.3478	187.911	116.057	75.9002	110.566	protein kinase cAMP-dependent type I regulatory subunit beta [Source:HGNC Symbol;Acc:HGNC:9390]
ENSCDRG00005015576	ENSCDRG00005015576	19.8059	1.14881	0.496819	2.31234	0.020759	0.336444	22.1635	13.8289	6.64788	9.29229	12.2929	12.8806	50.2552	19.5401	37.2341	13.9232	nan
GPAA1	ENSCDRG00005014443	217.716	0.419556	0.18139	2.313	0.0207226	0.336444	149.604	194.593	191.68	174.367	209.663	224.915	314.641	282.444	179.726	255.531	glycosylphosphatidylinositol anchor attachment 1 [Source:NCBI gene;Acc:105105008]
MTMR11	ENSCDRG00005015753	31.5964	0.720269	0.311483	2.31238	0.0207566	0.336444	27.7044	29.6334	14.4037	22.9574	23.9029	39.6326	56.8102	35.5275	32.2218	33.1699	myotubularin related protein 11 [Source:NCBI gene;Acc:105103170]
FNTA	ENSCDRG00005018946	62.1462	0.571213	0.247033	2.31229	0.0207615	0.336444	16.6226	52.3524	43.2112	63.9528	61.4647	75.3019	69.9202	77.5684	87.3568	73.7108	farnesyltransferase, CAAX box, alpha [Source:HGNC Symbol;Acc:HGNC:3782]
NINJ1	ENSCDRG00005010229	21.9258	0.817374	0.353495	2.31226	0.0207631	0.336444	16.6226	15.8045	16.6197	11.4787	19.1223	37.6509	28.4051	28.422	19.3331	25.7988	ninjurin 1 [Source:NCBI gene;Acc:105084674]
MCOLN1	ENSCDRG00005016454	76.4773	0.482874	0.209062	2.30972	0.0209038	0.338391	66.4905	56.3035	83.0984	56.3003	60.7817	103.045	69.9202	85.8582	88.7889	94.186	mucolipin 1 [Source:HGNC Symbol;Acc:HGNC:13356]
RNase_MRP	ENSCDRG00005005509	2561.18	0.390435	0.169091	2.30903	0.0209421	0.338677	1806.33	2278.81	1873.59	2853.28	2256.44	3836.43	2556.46	3021.62	2657.94	2470.95	RNase MRP [Source:RFAM;Acc:RF00030]
FES	ENSCDRG00005011337	88.7539	0.775374	0.335925	2.30818	0.0209894	0.339108	77.5723	71.1202	86.4224	38.2624	56.6841	184.291	117.99	60.9889	124.591	69.6158	FES proto-oncogene, tyrosine kinase [Source:NCBI gene;Acc:105094697]
APBA3	ENSCDRG00005005256	54.1993	0.725122	0.314246	2.3075	0.021027	0.339383	44.327	32.5968	70.9107	33.3429	24.5859	77.2835	80.8453	68.0944	57.9992	52.0071	amyloid beta precursor protein binding family A member 3 [Source:HGNC Symbol;Acc:HGNC:580]
ROS1	ENSCDRG00005002608	19.503	-1.52016	0.659557	-2.30482	0.0211769	0.340799	55.4088	39.5112	33.2394	1.63982	17.0735	6.9357	8.74003	15.3953	12.1727	4.91405	ROS proto-oncogene 1, receptor tyrosine kinase [Source:HGNC Symbol;Acc:HGNC:10261]
CUTA	ENSCDRG00005021706	96.1632	0.513378	0.222731	2.30493	0.0211706	0.340799	38.7861	85.937	78.6665	110.961	67.6112	118.898	126.73	113.096	100.962	119.985	cutA divalent cation tolerance homolog [Source:HGNC Symbol;Acc:HGNC:21101]
SWSAP1	ENSCDRG00005012518	12.673	-1.29999	0.56387	-2.30547	0.0211401	0.340799	27.7044	13.8289	28.8075	14.7583	6.14647	3.96326	8.74003	6.51338	12.1727	4.09505	SWIM-type zinc finger 7 associated protein 1 [Source:NCBI gene;Acc:105087607]
CRLF3	ENSCDRG00005017225	168.415	-0.583961	0.253528	-2.30334	0.0212598	0.341464	121.899	156.069	162.873	307.192	255.42	111.962	115.805	161.058	128.887	162.983	cytokine receptor like factor 3 [Source:HGNC Symbol;Acc:HGNC:17177]
ENSCDRG00005008215	ENSCDRG00005008215	189.865	0.828897	0.359818	2.30366	0.0212418	0.341464	88.6541	158.045	69.8027	220.828	141.369	369.574	85.2153	233.89	317.922	213.352	nan
GPR65	ENSCDRG00005003153	10.4862	1.19135	0.517372	2.30269	0.0212965	0.341578	11.0818	5.92669	3.32394	9.29229	4.09765	17.8347	13.11	17.1716	13.6048	9.4186	G protein-coupled receptor 65 [Source:NCBI gene;Acc:105105381]
FAM131B	ENSCDRG00005007298	86.5826	-0.636779	0.276607	-2.30211	0.0213292	0.341578	160.685	78.0347	130.742	91.283	75.8064	39.6326	65.5502	86.4503	65.1596	72.4823	family with sequence similarity 131 member B [Source:HGNC Symbol;Acc:HGNC:22202]
CYTH4	ENSCDRG00005008165	105.581	0.70062	0.304297	2.30242	0.0213115	0.341578	83.1132	92.8514	93.0703	57.9401	74.4406	214.016	159.506	83.4897	122.443	74.9393	cytohesin 4 [Source:NCBI gene;Acc:105101583]
RHPN1	ENSCDRG00005014308	61.3625	-0.727214	0.31604	-2.30102	0.0213905	0.342228	105.277	60.2546	83.0984	72.6985	59.4159	28.7336	89.5853	37.3039	43.6784	33.5794	rhophilin Rho GTPase binding protein 1 [Source:HGNC Symbol;Acc:HGNC:19973]
CSF1R	ENSCDRG00005002338	659.853	0.630696	0.274515	2.29749	0.0215907	0.344425	487.597	707.251	468.675	466.254	456.887	1394.08	782.233	560.151	855.667	419.742	colony stimulating factor 1 receptor [Source:NCBI gene;Acc:105098488]
RCN3	ENSCDRG00005007659	200.868	0.553058	0.240695	2.29776	0.0215757	0.344425	205.013	123.473	121.878	149.223	218.541	151.595	332.121	229.745	227.701	249.388	reticulocalbin 3 [Source:NCBI gene;Acc:105100202]
C1QTNF5	ENSCDRG00005021245	23.0542	-0.799957	0.348114	-2.29798	0.021563	0.344425	38.7861	37.5357	25.4835	27.3303	19.8053	14.8622	15.295	20.1323	18.617	12.6946	C1q and TNF related 5 [Source:HGNC Symbol;Acc:HGNC:14344]
CCDC103	ENSCDRG00005004456	28.0414	-0.749202	0.326201	-2.29675	0.0216329	0.344764	38.7861	28.6457	44.3192	40.9954	24.5859	21.7979	19.6651	21.9086	14.3208	25.3893	coiled-coil domain containing 103 [Source:NCBI gene;Acc:105094416]
TMEM251	ENSCDRG00005000783	11.4125	1.23355	0.537541	2.2948	0.0217445	0.346207	0	10.8656	2.21596	10.3855	7.51235	15.853	8.74003	18.948	17.901	21.7037	transmembrane protein 251 [Source:NCBI gene;Acc:105095813]
WDR72	ENSCDRG00005016225	15.0082	-1.77608	0.774133	-2.29429	0.021774	0.346219	49.8679	14.8167	11.0798	26.7836	12.9759	0	17.4801	2.96063	12.8887	1.22851	WD repeat domain 72 [Source:HGNC Symbol;Acc:HGNC:26790]
ENSCDRG00005021242	ENSCDRG00005021242	135.44	-0.682314	0.297427	-2.29405	0.0217874	0.346219	210.553	192.617	233.784	83.6306	115.417	122.861	139.84	100.661	75.1842	79.8534	nan
FAM185A	ENSCDRG00005017025	48.3394	0.741707	0.323425	2.29329	0.0218314	0.346584	16.6226	35.5601	23.2676	49.1945	46.44	48.5499	96.1403	63.9496	45.1105	58.5591	family with sequence similarity 185 member A [Source:HGNC Symbol;Acc:HGNC:22412]
CTSB	ENSCDRG00005010951	809.88	0.297789	0.129896	2.29252	0.0218756	0.34695	781.264	590.693	798.853	725.892	747.137	832.284	830.303	1026.75	809.841	955.784	cathepsin B [Source:NCBI gene;Acc:105101888]
SMARCD3	ENSCDRG00005011690	67.4053	-0.60547	0.26424	-2.29137	0.0219423	0.347673	105.277	71.1202	100.826	53.5673	79.9041	32.6969	65.5502	56.844	55.8511	52.4166	SWI/SNF related, matrix associated, actin dependent regulator of chromatin, subfamily d, member 3 [Source:NCBI gene;Acc:105098682]
OTP	ENSCDRG00005000470	152.289	-0.591735	0.258419	-2.28982	0.0220315	0.347949	227.176	112.607	252.619	174.914	155.711	85.21	102.695	172.901	111.702	127.356	orthopedia homeobox [Source:HGNC Symbol;Acc:HGNC:8518]
GPR4	ENSCDRG00005008750	10.9187	1.31777	0.575545	2.2896	0.0220443	0.347949	5.54088	13.8289	2.21596	6.01266	3.4147	25.7612	13.11	13.6189	15.0368	10.6471	G protein-coupled receptor 4 [Source:NCBI gene;Acc:105095444]
OVCH2	ENSCDRG00005012597	8.28313	-2.09307	0.913773	-2.29058	0.0219877	0.347949	38.7861	16.7923	4.43192	1.63982	7.51235	0	2.18501	7.69763	2.14812	1.63802	ovochymase 2 [Source:NCBI gene;Acc:105094001]
ENSCDRG00005016680	ENSCDRG00005016680	404.763	0.517731	0.226102	2.28982	0.022032	0.347949	282.585	404.002	269.239	367.865	332.592	747.074	489.442	336.919	460.413	357.497	nan
SPAG17	ENSCDRG00005003031	26.1536	-1.69936	0.743044	-2.28702	0.0221944	0.349982	105.277	34.5723	32.1314	5.46605	22.5371	2.97244	32.7751	7.69763	16.4689	1.63802	sperm associated antigen 17 [Source:NCBI gene;Acc:105089633]
ENSCDRG00005015344	ENSCDRG00005015344	11.9359	-1.99005	0.870635	-2.28574	0.0222694	0.350828	66.4905	10.8656	12.1878	1.63982	4.78059	1.98163	13.11	2.3685	4.29624	1.63802	olfactory receptor 8B3 [Source:NCBI gene;Acc:105094521]
CDK5R1	ENSCDRG00005018360	35.7168	-0.721052	0.315608	-2.28465	0.0223336	0.351169	38.7861	56.3035	39.8873	42.0886	45.0741	11.8898	28.4051	28.422	34.3699	31.9414	cyclin dependent kinase 5 regulatory subunit 1 [Source:NCBI gene;Acc:105088224]
CORO1A	ENSCDRG00005008664	108.409	0.64051	0.280355	2.28464	0.0223338	0.351169	66.4905	80.9981	117.446	60.6732	91.5141	176.365	187.911	102.438	116.714	83.5389	coronin 1A [Source:NCBI gene;Acc:105102770]
JMJD7	ENSCDRG00005019113	45.1605	0.771753	0.337905	2.28394	0.0223753	0.351487	16.6226	37.5357	50.967	30.6099	24.5859	70.3478	80.8453	33.159	62.2954	44.636	jumonji domain containing 7 [Source:NCBI gene;Acc:105096849]
ACER2	ENSCDRG00005001013	42.1652	0.917981	0.402269	2.28201	0.0224887	0.352931	27.7044	40.499	14.4037	21.8642	40.2935	79.2651	56.8102	21.9086	70.1719	48.731	alkaline ceramidase 2 [Source:NCBI gene;Acc:105095941]
GABRB2	ENSCDRG00005010424	102.449	-0.716891	0.314222	-2.28148	0.0225198	0.353083	171.767	87.9125	75.3426	181.473	124.295	39.6326	85.2153	104.214	63.7275	90.91	gamma-aminobutyric acid type A receptor beta2 subunit [Source:NCBI gene;Acc:105103729]
CCDC6	ENSCDRG00005012383	268.051	0.479649	0.21041	2.27959	0.0226323	0.353882	199.472	173.849	262.591	254.171	228.785	262.566	240.351	398.5	249.898	410.324	coiled-coil domain containing 6 [Source:HGNC Symbol;Acc:HGNC:18782]
ENSCDRG00005004554	ENSCDRG00005004554	223.506	0.535297	0.234775	2.28004	0.0226052	0.353882	72.0314	222.251	161.765	221.922	215.809	326.969	235.981	228.56	234.861	314.909	nan
MIEF2	ENSCDRG00005018174	71.5724	0.628462	0.275697	2.27953	0.0226354	0.353882	44.327	70.1325	56.5069	53.5673	49.1717	86.2008	148.58	74.6078	60.1473	72.4823	mitochondrial elongation factor 2 [Source:HGNC Symbol;Acc:HGNC:17920]
ADAMTS15	ENSCDRG00005011889	16.4413	-1.1277	0.494803	-2.27909	0.0226615	0.353954	27.7044	22.719	32.1314	10.3855	19.1223	2.97244	19.6651	10.0661	11.4566	8.19009	ADAM metallopeptidase with thrombospondin type 1 motif 15 [Source:HGNC Symbol;Acc:HGNC:16305]
ADGRL4	ENSCDRG00005014755	54.708	0.906455	0.397868	2.27828	0.0227097	0.354371	27.7044	43.4624	43.2112	44.8216	30.0494	126.824	19.6651	46.7779	68.7398	95.8241	adhesion G protein-coupled receptor L4 [Source:HGNC Symbol;Acc:HGNC:20822]
ILK	ENSCDRG00005014817	134.763	-0.405466	0.178053	-2.27723	0.0227728	0.354642	160.685	150.143	157.333	139.384	168.003	126.824	78.6603	126.715	105.974	133.908	integrin linked kinase [Source:NCBI gene;Acc:105097907]
ENSCDRG00005010520	ENSCDRG00005010520	9.14612	-1.71129	0.751588	-2.27691	0.0227918	0.354642	33.2453	12.8412	17.7277	2.73303	4.78059	2.97244	6.55502	6.51338	2.86416	1.22851	nan
CLUH	ENSCDRG00005008015	320.665	-0.429968	0.188826	-2.27706	0.0227827	0.354642	437.729	316.09	439.868	285.874	362.642	259.593	371.451	267.049	208.368	257.988	clustered mitochondria homolog [Source:HGNC Symbol;Acc:HGNC:29094]
SLC7A1	ENSCDRG00005004941	407.301	0.482804	0.212102	2.27628	0.0228293	0.354889	277.044	448.453	259.267	324.137	383.13	647.002	408.596	388.434	373.057	563.888	solute carrier family 7 member 1 [Source:HGNC Symbol;Acc:HGNC:11057]
HIF1A	ENSCDRG00005000138	308.602	0.535867	0.235472	2.27571	0.0228634	0.355068	138.522	279.542	208.3	317.578	303.226	405.243	225.056	378.368	355.156	475.025	hypoxia inducible factor 1 subunit alpha [Source:HGNC Symbol;Acc:HGNC:4910]
AXIN1	ENSCDRG00005009337	90.6602	0.512873	0.225402	2.27537	0.0228839	0.355068	66.4905	86.9247	86.4224	74.8849	53.9523	113.944	144.21	100.069	83.0606	96.6431	axin 1 [Source:NCBI gene;Acc:105098424]
FOXP3	ENSCDRG00005019325	6.93257	-2.22548	0.978434	-2.27454	0.0229338	0.355506	33.2453	3.95112	8.86383	0	11.61	2.97244	4.37001	2.3685	0.71604	1.22851	forkhead box P3 [Source:HGNC Symbol;Acc:HGNC:6106]
ATP13A2	ENSCDRG00005004796	1118.84	0.456766	0.200877	2.27385	0.0229749	0.355807	958.572	748.738	1164.49	646.087	1198.56	1060.17	1509.84	1504.59	1027.52	1369.79	ATPase cation transporting 13A2 [Source:HGNC Symbol;Acc:HGNC:30213]
ENSCDRG00005000691	ENSCDRG00005000691	77.6829	0.557835	0.245457	2.27264	0.0230478	0.355959	49.8679	48.4013	72.0186	81.9908	58.05	93.1365	89.5853	83.4897	73.7521	126.537	nan
CAMTA1	ENSCDRG00005009778	291.261	-0.353402	0.155483	-2.27294	0.0230301	0.355959	304.748	316.09	350.121	327.963	329.178	187.264	303.716	290.141	235.577	267.816	calmodulin binding transcription activator 1 [Source:HGNC Symbol;Acc:HGNC:18806]
C1QTNF6	ENSCDRG00005008048	12.4038	-1.10494	0.4862	-2.27261	0.0230496	0.355959	27.7044	14.8167	22.1596	9.83889	12.9759	9.90814	4.37001	9.47401	7.87644	4.91405	C1q and TNF related 6 [Source:HGNC Symbol;Acc:HGNC:14343]
EGFLAM	ENSCDRG00005017766	25.6754	-0.872819	0.384216	-2.27169	0.0231055	0.356488	27.7044	28.6457	46.5351	19.6778	39.6106	16.8438	32.7751	18.3559	14.3208	12.2851	EGF like, fibronectin type III and laminin G domains [Source:HGNC Symbol;Acc:HGNC:26810]
TMEM164	ENSCDRG00005016137	342.896	-0.455811	0.200757	-2.27046	0.0231794	0.357293	343.534	269.664	407.736	515.995	444.595	240.768	238.166	346.393	281.404	340.708	transmembrane protein 164 [Source:NCBI gene;Acc:105093184]
EFHD2	ENSCDRG00005019753	187.896	0.702805	0.309623	2.26987	0.0232154	0.357513	77.5723	196.568	151.793	143.211	134.539	396.326	303.716	146.255	186.886	142.098	EF-hand domain family member D2 [Source:HGNC Symbol;Acc:HGNC:28670]
CTSZ	ENSCDRG00005019619	124.514	0.396292	0.174684	2.26862	0.0232911	0.358344	127.44	92.8514	118.554	106.588	96.9776	125.833	166.061	153.361	120.295	137.184	cathepsin Z [Source:HGNC Symbol;Acc:HGNC:2547]
NAPG	ENSCDRG00005016543	362.408	-0.420363	0.185354	-2.2679	0.0233354	0.358689	426.648	334.858	429.896	490.305	398.155	218.97	262.201	377.184	310.761	375.106	NSF attachment protein gamma [Source:HGNC Symbol;Acc:HGNC:7642]
ENSCDRG00005007462	ENSCDRG00005007462	208.505	0.621629	0.274244	2.2667	0.0234085	0.358791	88.6541	110.631	161.765	256.904	189.858	272.474	284.051	276.523	151.8	292.386	CD164 molecule [Source:NCBI gene;Acc:105097113]
PRDM1	ENSCDRG00005010476	44.283	0.756517	0.333755	2.26668	0.0234096	0.358791	44.327	33.5846	32.1314	26.237	30.7323	76.2927	74.2902	25.4614	52.2709	47.5025	PR/SET domain 1 [Source:NCBI gene;Acc:105097136]
KCNK4	ENSCDRG00005017883	20.5413	-1.32655	0.585124	-2.26713	0.023382	0.358791	72.0314	25.6823	33.2394	12.0253	8.87823	13.8714	4.37001	10.6583	19.3331	5.32356	potassium two pore domain channel subfamily K member 4 [Source:HGNC Symbol;Acc:HGNC:6279]
TTC21A	ENSCDRG00005019602	36.828	-0.618189	0.27281	-2.266	0.0234511	0.358791	44.327	40.499	60.9389	37.7157	38.9276	29.7244	32.7751	28.422	30.7897	24.1608	tetratricopeptide repeat domain 21A [Source:HGNC Symbol;Acc:HGNC:30761]
SMARCB1	ENSCDRG00005021994	145.598	-0.415301	0.18325	-2.2663	0.0234328	0.358791	155.145	121.497	210.516	180.38	161.857	129.797	124.545	125.531	135.331	111.385	SWI/SNF related, matrix associated, actin dependent regulator of chromatin, subfamily b, member 1 [Source:NCBI gene;Acc:105095207]
SSBP3	ENSCDRG00005010956	105.264	-0.38057	0.168027	-2.26494	0.0235165	0.359124	155.145	115.57	114.122	110.414	109.271	82.2376	93.9553	90.5952	94.5172	86.815	single stranded DNA binding protein 3 [Source:HGNC Symbol;Acc:HGNC:15674]
METTL7A	ENSCDRG00005003947	104.592	0.576786	0.254651	2.26501	0.0235122	0.359124	22.1635	77.0469	115.23	81.4442	109.271	115.925	117.99	120.201	131.035	155.612	methyltransferase like 7A [Source:HGNC Symbol;Acc:HGNC:24550]
DTX1	ENSCDRG00005013422	185.232	-0.327833	0.1448	-2.26403	0.023572	0.359637	177.308	210.397	221.596	187.486	224.005	158.53	192.281	172.901	154.665	153.155	deltex E3 ubiquitin ligase 1 [Source:HGNC Symbol;Acc:HGNC:3060]
EGR1	ENSCDRG00005000981	72.3897	-0.699646	0.30909	-2.26356	0.023601	0.359746	55.4088	98.7781	76.4506	103.308	103.124	66.3845	98.3253	34.9354	51.5549	35.6269	early growth response 1 [Source:HGNC Symbol;Acc:HGNC:3238]
UGT2A1	ENSCDRG00005018328	8.21295	-2.22699	0.984299	-2.26251	0.0236659	0.359928	44.327	4.93891	9.97181	1.09321	9.56117	0.990814	0	2.96063	7.87644	0.409505	UDP glucuronosyltransferase family 2 member A1 complex locus [Source:HGNC Symbol;Acc:HGNC:12542]
CBFA2T2	ENSCDRG00005011021	79.5237	-0.521054	0.230268	-2.26281	0.0236471	0.359928	121.899	62.2302	104.15	96.7491	91.5141	50.5315	54.6252	64.5417	77.3323	71.6633	CBFA2/RUNX1 partner transcriptional co-repressor 2 [Source:HGNC Symbol;Acc:HGNC:1536]
ST8SIA6	ENSCDRG00005007771	8.73115	-2.13726	0.944729	-2.2623	0.0236786	0.359928	44.327	8.89003	17.7277	1.09321	1.36588	4.95407	0	4.14488	3.5802	1.22851	ST8 alpha-N-acetyl-neuraminide alpha-2,8-sialyltransferase 6 [Source:NCBI gene;Acc:105100055]
POLD2	ENSCDRG00005010307	58.2297	-0.591229	0.261382	-2.26194	0.0237011	0.359937	88.6541	65.1936	87.5304	55.7537	55.3182	48.5499	54.6252	30.7905	53.703	42.179	DNA polymerase delta 2, accessory subunit [Source:NCBI gene;Acc:105092328]
ENSCDRG00005002017	ENSCDRG00005002017	7.45362	-2.12324	0.93898	-2.26122	0.0237455	0.359989	44.327	0.987781	6.64788	3.27963	8.19529	3.96326	0	3.55275	0.71604	2.86653	nan
STMN3	ENSCDRG00005009921	409.842	-0.535744	0.236969	-2.26082	0.0237701	0.359989	465.434	388.198	594.985	510.529	459.619	188.255	526.587	319.156	277.107	368.554	stathmin 3 [Source:HGNC Symbol;Acc:HGNC:15926]
DNASE2	ENSCDRG00005022189	66.0909	0.570492	0.252336	2.26084	0.023769	0.359989	49.8679	51.3646	46.5351	64.4994	49.8547	111.962	87.4003	66.9102	75.1842	57.3306	deoxyribonuclease 2, lysosomal [Source:NCBI gene;Acc:105100754]
ENSCDRG00005008596	ENSCDRG00005008596	17.9735	-1.06262	0.47042	-2.25887	0.0238913	0.36149	5.54088	27.6579	27.6995	26.7836	33.4641	16.8438	0	11.2504	15.7529	14.7422	nan
ENSCDRG00005020778	ENSCDRG00005020778	10.3318	-2.6293	1.16449	-2.25791	0.0239515	0.362038	77.5723	3.95112	3.32394	1.09321	4.09765	0	4.37001	5.32913	3.5802	0	nan
MPP2	ENSCDRG00005013377	438.959	-0.459143	0.203378	-2.25759	0.0239715	0.362038	559.629	443.514	552.882	491.398	489.669	248.694	565.917	398.5	306.465	332.927	membrane palmitoylated protein 2 [Source:HGNC Symbol;Acc:HGNC:7220]
CPO	ENSCDRG00005016423	5.64921	-2.08971	0.925982	-2.25675	0.0240239	0.362165	27.7044	6.91447	8.86383	1.09321	3.4147	1.98163	0	3.55275	2.14812	0.819009	carboxypeptidase O [Source:HGNC Symbol;Acc:HGNC:21011]
COG2	ENSCDRG00005014234	101.23	0.463993	0.205571	2.25709	0.0240025	0.362165	49.8679	83.9614	94.1782	86.9102	96.9776	145.65	137.655	103.622	95.9493	117.528	component of oligomeric golgi complex 2 [Source:HGNC Symbol;Acc:HGNC:6546]
BANK1	ENSCDRG00005017012	63.6433	0.780146	0.345979	2.2549	0.0241398	0.36339	55.4088	60.2546	50.967	39.9022	31.4153	141.686	43.7001	70.4629	93.0851	49.55	B cell scaffold protein with ankyrin repeats 1 [Source:HGNC Symbol;Acc:HGNC:18233]
ANKRD1	ENSCDRG00005019372	10.7419	-1.73776	0.770953	-2.25404	0.0241936	0.36339	55.4088	10.8656	11.0798	1.63982	6.82941	4.95407	4.37001	2.96063	6.44436	2.86653	ankyrin repeat domain 1 [Source:NCBI gene;Acc:105084223]
GIPC2	ENSCDRG00005014503	8.01907	-2.1522	0.954528	-2.25472	0.0241507	0.36339	49.8679	3.95112	6.64788	4.91945	3.4147	0	0	4.737	2.14812	4.50455	GIPC PDZ domain containing family member 2 [Source:NCBI gene;Acc:105096668]
CACNB3	ENSCDRG00005008229	204.366	-0.578881	0.25678	-2.25439	0.0241719	0.36339	227.176	212.373	255.943	269.476	252.005	84.2192	270.941	181.19	125.307	165.03	calcium voltage-gated channel auxiliary subunit beta 3 [Source:NCBI gene;Acc:105103791]
ENSCDRG00005006295	ENSCDRG00005006295	43.8179	0.744895	0.330631	2.25295	0.0242622	0.363909	27.7044	36.5479	29.9154	31.1565	34.83	92.1457	67.7352	37.3039	44.3945	36.4459	nan
BTBD1	ENSCDRG00005016198	104.721	0.643474	0.285634	2.25279	0.0242724	0.363909	49.8679	75.0714	77.5585	117.52	83.3188	161.503	58.9952	127.307	125.307	170.763	BTB domain containing 1 [Source:HGNC Symbol;Acc:HGNC:1120]
SYT16	ENSCDRG00005000342	48.8948	-0.869591	0.386137	-2.25203	0.0243206	0.364178	60.9497	52.3524	65.3708	61.7664	79.9041	22.7887	6.55502	53.2913	31.5057	54.4641	synaptotagmin 16 [Source:NCBI gene;Acc:105086212]
SLC34A1	ENSCDRG00005009116	14.1436	-1.52749	0.678342	-2.2518	0.0243346	0.364178	16.6226	22.719	53.183	6.55926	5.46353	5.94488	8.74003	8.28976	11.4566	2.45703	solute carrier family 34 member 1 [Source:HGNC Symbol;Acc:HGNC:11019]
MAPRE3	ENSCDRG00005006682	323.299	-0.458494	0.203826	-2.24944	0.0244844	0.366087	277.044	277.566	413.276	485.932	405.667	209.062	334.306	294.286	229.133	306.719	microtubule associated protein RP/EB family member 3 [Source:NCBI gene;Acc:105098523]
DAD1	ENSCDRG00005007062	142.721	0.486789	0.21656	2.24783	0.0245872	0.366956	138.522	99.7659	104.15	116.973	140.686	166.457	152.95	169.348	113.134	225.227	defender against cell death 1 [Source:NCBI gene;Acc:105096963]
C19orf67	ENSCDRG00005016012	11.4858	1.39356	0.61991	2.248	0.0245762	0.366956	5.54088	7.90225	6.64788	1.63982	8.87823	14.8622	34.9601	15.3953	12.8887	6.14257	chromosome 19 open reading frame 67 [Source:HGNC Symbol;Acc:HGNC:34354]
ENSCDRG00005008318	ENSCDRG00005008318	6.358	-2.05127	0.913882	-2.24457	0.024796	0.366981	5.54088	16.7923	21.0516	1.63982	6.14647	0	2.18501	2.96063	6.44436	0.819009	nan
C5orf49	ENSCDRG00005004257	31.5136	-0.817183	0.364163	-2.24401	0.024832	0.366981	49.8679	39.5112	27.6995	39.3556	45.0741	25.7612	26.2201	34.9354	10.7406	15.9707	chromosome 5 open reading frame 49 [Source:HGNC Symbol;Acc:HGNC:27028]
ENSCDRG00005018411	ENSCDRG00005018411	13.7816	-1.6522	0.735907	-2.24512	0.0247604	0.366981	66.4905	19.7556	12.1878	2.18642	6.82941	7.92651	8.74003	5.92125	2.86416	4.91405	nan
ABCB5	ENSCDRG00005006056	13.4376	-2.01074	0.894823	-2.24707	0.0246352	0.366981	49.8679	15.8045	35.4553	1.63982	4.78059	0	13.11	5.32913	7.1604	1.22851	ATP binding cassette subfamily B member 5 [Source:NCBI gene;Acc:105092897]
CARMIL2	ENSCDRG00005013507	83.5046	-0.712057	0.317126	-2.24534	0.0247461	0.366981	171.767	69.1447	136.281	63.9528	82.6359	41.6142	96.1403	65.1338	49.4067	58.9687	capping protein regulator and myosin 1 linker 2 [Source:HGNC Symbol;Acc:HGNC:27089]
SDK2	ENSCDRG00005013722	47.3393	-0.867035	0.386334	-2.24426	0.0248156	0.366981	138.522	49.3891	60.9389	32.7963	32.0982	28.7336	45.8851	30.7905	24.3453	29.8938	sidekick cell adhesion molecule 2 [Source:HGNC Symbol;Acc:HGNC:19308]
WIPI1	ENSCDRG00005020076	131.341	0.402484	0.179341	2.24424	0.0248169	0.366981	138.522	128.412	101.934	104.402	100.392	175.374	142.025	126.715	162.541	133.089	WD repeat domain, phosphoinositide interacting 1 [Source:NCBI gene;Acc:105085704]
XYLB	ENSCDRG00005018064	18.2831	-0.917528	0.408824	-2.24431	0.0248125	0.366981	33.2453	21.7312	32.1314	21.8642	12.9759	11.8898	10.925	16.5795	12.8887	8.59959	xylulokinase [Source:HGNC Symbol;Acc:HGNC:12839]
KIF9	ENSCDRG00005008138	40.414	0.715369	0.318759	2.24423	0.0248173	0.366981	16.6226	46.4257	22.1596	27.3303	33.4641	42.605	78.6603	40.2645	42.9624	53.6451	kinesin family member 9 [Source:HGNC Symbol;Acc:HGNC:16666]
SLC22A7	ENSCDRG00005013276	8.3125	-1.44298	0.642064	-2.24741	0.0246138	0.366981	22.1635	13.8289	15.5117	3.82624	6.82941	5.94488	4.37001	5.32913	2.86416	2.45703	solute carrier family 22 member 7 [Source:NCBI gene;Acc:105088619]
GNA12	ENSCDRG00005009204	206.467	0.33608	0.14977	2.24397	0.0248343	0.366981	182.849	169.898	155.117	186.939	214.443	253.648	235.981	212.573	242.737	210.485	G protein subunit alpha 12 [Source:HGNC Symbol;Acc:HGNC:4380]
PIEZO2	ENSCDRG00005016976	52.0527	-1.04006	0.463826	-2.24235	0.024939	0.367301	149.604	61.2424	81.9905	26.237	34.147	18.8255	67.7352	33.159	22.1972	25.3893	piezo type mechanosensitive ion channel component 2 [Source:HGNC Symbol;Acc:HGNC:26270]
ESAM	ENSCDRG00005015816	59.5084	0.649467	0.289542	2.24308	0.0248914	0.367301	77.5723	41.4868	32.1314	39.9022	48.4888	90.1641	87.4003	47.37	77.3323	53.2356	endothelial cell adhesion molecule [Source:HGNC Symbol;Acc:HGNC:17474]
SLC6A12	ENSCDRG00005022397	21.6386	-1.25485	0.559669	-2.24214	0.0249525	0.367301	88.6541	19.7556	19.9436	8.19908	22.5371	17.8347	6.55502	9.47401	13.6048	9.82811	solute carrier family 6 member 12 [Source:HGNC Symbol;Acc:HGNC:11045]
SLC39A14	ENSCDRG00005014310	62.4333	0.548802	0.244793	2.2419	0.0249676	0.367301	49.8679	52.3524	46.5351	53.0207	47.1229	67.3754	115.805	56.2519	68.0238	67.9777	solute carrier family 39 member 14 [Source:HGNC Symbol;Acc:HGNC:20858]
SEPTIN12	ENSCDRG00005009523	7.23693	-2.56736	1.14495	-2.24233	0.0249398	0.367301	44.327	5.92669	6.64788	2.18642	2.04882	0	8.74003	1.77638	0.71604	0	septin 12 [Source:HGNC Symbol;Acc:HGNC:26348]
GABRA6	ENSCDRG00005010202	9.01572	-2.09589	0.935283	-2.24092	0.0250313	0.367909	44.327	11.8534	11.0798	0.546605	7.51235	3.96326	0	4.737	5.72832	0.409505	gamma-aminobutyric acid type A receptor alpha6 subunit [Source:NCBI gene;Acc:105103730]
HSPA5	ENSCDRG00005016512	1146.05	0.442533	0.197533	2.2403	0.0250713	0.368045	609.497	845.541	999.397	1203.62	1180.8	1011.62	1282.6	1496.3	1188.63	1642.52	heat shock protein family A (Hsp70) member 5 [Source:NCBI gene;Acc:105092624]
THY1	ENSCDRG00005021265	297.195	-0.613066	0.27368	-2.24009	0.0250853	0.368045	432.189	371.406	279.211	276.582	445.277	107.008	187.911	287.181	247.75	337.432	Thy-1 cell surface antigen [Source:NCBI gene;Acc:105090133]
ADIPOQ	ENSCDRG00005007154	8.78751	-1.76352	0.78748	-2.23944	0.0251272	0.368261	27.7044	5.92669	25.4835	2.73303	8.19529	4.95407	0	5.92125	5.72832	1.22851	adiponectin, C1Q and collagen domain containing [Source:NCBI gene;Acc:105085843]
SATB2	ENSCDRG00005010563	28.5758	-1.30907	0.584621	-2.23917	0.0251448	0.368261	110.818	21.7312	26.5915	6.55926	42.3423	18.8255	17.4801	11.8425	22.1972	7.37108	SATB homeobox 2 [Source:HGNC Symbol;Acc:HGNC:21637]
HOXB3	ENSCDRG00005018104	7.61284	-3.05933	1.36662	-2.2386	0.0251818	0.36841	55.4088	2.96334	7.75585	0	2.73176	2.97244	0	0	4.29624	0	homeobox B3 [Source:HGNC Symbol;Acc:HGNC:5114]
EME2	ENSCDRG00005011861	19.5029	0.980979	0.438265	2.23833	0.0251998	0.36841	5.54088	13.8289	24.3755	9.83889	8.87823	37.6509	34.9601	22.5008	18.617	18.8372	essential meiotic structure-specific endonuclease subunit 2 [Source:HGNC Symbol;Acc:HGNC:27289]
RND1	ENSCDRG00005007992	46.7961	-0.693331	0.309882	-2.2374	0.0252602	0.368638	49.8679	49.3891	78.6665	51.3809	60.7817	16.8438	30.5901	47.9622	44.3945	38.0839	Rho family GTPase 1 [Source:NCBI gene;Acc:105103789]
DUSP26	ENSCDRG00005017276	132.58	-0.511092	0.228421	-2.2375	0.0252536	0.368638	138.522	114.583	213.84	162.342	146.832	85.21	124.545	147.439	93.8012	98.6906	dual specificity phosphatase 26 [Source:NCBI gene;Acc:105095810]
PHF24	ENSCDRG00005008694	213.903	-0.469976	0.210164	-2.23623	0.0253366	0.369424	232.717	203.483	311.342	210.99	284.103	129.797	179.171	238.034	147.504	201.886	PHD finger protein 24 [Source:NCBI gene;Acc:105102315]
ENSCDRG00005020080	ENSCDRG00005020080	16.4173	-1.03997	0.465302	-2.23505	0.025414	0.36986	27.7044	15.8045	24.3755	19.6778	21.8541	7.92651	19.6651	15.3953	3.5802	8.19009	diphosphoinositol polyphosphate phosphohydrolase 3-beta [Source:NCBI gene;Acc:105104372]
PIFO	ENSCDRG00005001125	8.52763	-1.5811	0.707505	-2.23475	0.0254339	0.36986	16.6226	11.8534	25.4835	7.65247	4.09765	4.95407	0	8.88188	2.86416	2.86653	primary cilia formation [Source:NCBI gene;Acc:105100467]
HAL	ENSCDRG00005019802	10.8635	-1.2753	0.570577	-2.2351	0.0254106	0.36986	22.1635	14.8167	23.2676	7.10587	10.9271	1.98163	6.55502	7.69763	10.0246	4.09505	histidine ammonia-lyase [Source:NCBI gene;Acc:105097431]
CIB2	ENSCDRG00005018630	86.3682	-0.571989	0.256264	-2.23203	0.0256132	0.372138	155.145	91.8636	113.014	89.0966	71.7088	54.4948	104.88	63.9496	54.419	65.1112	calcium and integrin binding family member 2 [Source:NCBI gene;Acc:105092227]
ALOX5	ENSCDRG00005017469	68.9421	0.783788	0.351315	2.23101	0.0256806	0.372788	49.8679	77.0469	27.6995	42.6352	54.6353	148.622	93.9553	57.4362	85.9248	51.5976	arachidonate 5-lipoxygenase [Source:NCBI gene;Acc:105093424]
EMX2	ENSCDRG00005016940	8.64216	-1.8428	0.826918	-2.22851	0.0258462	0.372883	44.327	11.8534	6.64788	1.63982	4.78059	2.97244	6.55502	3.55275	2.86416	1.22851	empty spiracles homeobox 2 [Source:HGNC Symbol;Acc:HGNC:3341]
ERO1B	ENSCDRG00005008068	136.344	0.516066	0.23162	2.22807	0.025876	0.372883	66.4905	112.607	105.258	133.918	134.539	171.411	91.7703	191.849	192.615	162.983	endoplasmic reticulum oxidoreductase 1 beta [Source:HGNC Symbol;Acc:HGNC:14355]
PNKP	ENSCDRG00005009984	131.571	0.523556	0.234841	2.2294	0.0257872	0.372883	110.818	110.631	116.338	97.8423	99.7094	172.402	244.721	114.28	133.899	115.071	polynucleotide kinase 3'-phosphatase [Source:HGNC Symbol;Acc:HGNC:9154]
SMPD1	ENSCDRG00005015860	108.839	0.457741	0.205355	2.22902	0.0258127	0.372883	94.1949	95.8148	75.3426	94.5627	97.6606	141.686	137.655	137.373	83.0606	131.041	sphingomyelin phosphodiesterase 1 [Source:NCBI gene;Acc:105097918]
SRSF10	ENSCDRG00005003602	72.0178	0.518935	0.232811	2.22899	0.0258142	0.372883	77.5723	61.2424	35.4553	61.7664	64.8794	71.3386	91.7703	74.6078	84.4927	97.0526	serine and arginine rich splicing factor 10 [Source:NCBI gene;Acc:105097283]
NEK6	ENSCDRG00005006640	84.2843	0.487345	0.21873	2.22806	0.0258762	0.372883	49.8679	74.0836	67.5867	73.2451	75.8064	111.962	126.73	70.4629	103.826	89.272	NIMA related kinase 6 [Source:NCBI gene;Acc:105092637]
OTOGL	ENSCDRG00005010509	30.2759	-0.887034	0.398162	-2.22782	0.0258925	0.372883	49.8679	44.4502	54.291	22.9574	28.0006	7.92651	19.6651	25.4614	30.0737	20.0657	otogelin like [Source:NCBI gene;Acc:105084894]
ENSCDRG00005013131	ENSCDRG00005013131	195.217	-0.359674	0.161495	-2.22716	0.0259366	0.372883	232.717	161.008	232.676	221.375	249.273	158.53	187.911	180.598	164.689	163.392	nan
ENSCDRG00005011256	ENSCDRG00005011256	28.1473	-0.979896	0.439944	-2.22732	0.0259259	0.372883	66.4905	53.3402	32.1314	12.5719	26.6347	23.7795	15.295	14.8031	22.9133	13.5136	nan
ABI1	ENSCDRG00005010036	160.046	0.44687	0.200481	2.22899	0.0258147	0.372883	127.44	131.375	96.3942	167.808	151.613	237.795	146.395	174.677	187.602	179.363	abl interactor 1 [Source:NCBI gene;Acc:105102339]
GOLT1B	ENSCDRG00005018507	43.5367	0.77732	0.348915	2.22782	0.0258925	0.372883	11.0818	37.5357	19.9436	43.7284	41.6594	52.5131	41.5151	60.9889	40.8143	85.5864	golgi transport 1B [Source:HGNC Symbol;Acc:HGNC:20175]
SP2	ENSCDRG00005018756	65.8874	-0.737102	0.331054	-2.22653	0.0259787	0.373163	132.981	85.937	104.15	38.809	57.367	46.5683	43.7001	47.9622	66.5917	34.8079	Sp2 transcription factor [Source:NCBI gene;Acc:105106954]
ENSCDRG00005014737	ENSCDRG00005014737	27.1411	-1.65178	0.741986	-2.22616	0.0260036	0.373195	144.063	16.7923	32.1314	8.19908	7.51235	6.9357	24.0351	15.9874	12.8887	2.86653	nan
CHTF8	ENSCDRG00005018285	36.356	0.623379	0.280099	2.22557	0.0260432	0.373437	11.0818	37.5357	27.6995	31.7031	28.6835	53.504	39.3301	42.633	39.3822	52.0071	chromosome transmission fidelity factor 8 [Source:NCBI gene;Acc:105088408]
ENSCDRG00005010405	ENSCDRG00005010405	303.996	0.459156	0.206409	2.2245	0.0261149	0.37414	216.094	242.006	265.915	288.061	262.932	533.058	249.091	301.392	378.785	302.624	putative thymosin beta-4-like protein 2 [Source:NCBI gene;Acc:105089420]
SLC4A7	ENSCDRG00005008934	135.957	0.538313	0.242045	2.22402	0.0261473	0.374277	66.4905	112.607	108.582	116.973	140.003	231.85	117.99	124.938	197.627	142.508	solute carrier family 4 member 7 [Source:HGNC Symbol;Acc:HGNC:11033]
FIG4	ENSCDRG00005006506	134.088	0.620527	0.279122	2.22313	0.0262067	0.374476	60.9497	102.729	55.399	164.528	134.539	179.337	139.84	172.901	143.924	186.734	FIG4 phosphoinositide 5-phosphatase [Source:NCBI gene;Acc:105097108]
GRN	ENSCDRG00005003644	105.809	0.693203	0.311805	2.2232	0.0262026	0.374476	116.358	92.8514	70.9107	62.313	68.2941	212.034	144.21	82.8976	138.196	70.0253	granulin precursor [Source:NCBI gene;Acc:105094426]
EDN1	ENSCDRG00005014451	10.5847	-1.52771	0.687476	-2.2222	0.0262695	0.374476	38.7861	20.7434	8.86383	8.74568	3.4147	0.990814	8.74003	5.32913	5.72832	4.50455	endothelin 1 [Source:NCBI gene;Acc:105102504]
ENSCDRG00005009074	ENSCDRG00005009074	5.47351	-2.70108	1.21546	-2.22227	0.0262651	0.374476	33.2453	5.92669	7.75585	0.546605	0.682941	0	2.18501	2.96063	1.43208	0	nan
TBX5	ENSCDRG00005014955	14.3545	-2.05421	0.924438	-2.22212	0.0262751	0.374476	83.1132	7.90225	21.0516	2.18642	2.04882	0.990814	15.295	5.32913	3.5802	2.04752	T-box transcription factor 5 [Source:NCBI gene;Acc:105104925]
IRF2BP2	ENSCDRG00005006772	282.243	0.337419	0.151907	2.22123	0.0263355	0.375014	182.849	277.566	219.38	265.65	282.055	359.666	334.306	306.721	318.638	275.597	interferon regulatory factor 2 binding protein 2 [Source:HGNC Symbol;Acc:HGNC:21729]
WBP4	ENSCDRG00005011462	40.3082	0.680764	0.306578	2.22053	0.0263831	0.375365	5.54088	36.5479	24.3755	45.3682	33.4641	54.4948	43.7001	48.5543	50.8388	60.1972	WW domain binding protein 4 [Source:NCBI gene;Acc:105098503]
ARHGEF35	ENSCDRG00005008198	11.6134	-1.62324	0.731153	-2.22011	0.0264113	0.375442	49.8679	11.8534	17.7277	5.46605	5.46353	8.91733	4.37001	5.92125	5.72832	0.819009	Rho guanine nucleotide exchange factor 35 [Source:HGNC Symbol;Acc:HGNC:33846]
ENSCDRG00005001747	ENSCDRG00005001747	16.066	-1.5195	0.685199	-2.21761	0.0265818	0.375776	77.5723	16.7923	8.86383	12.0253	8.87823	0.990814	6.55502	7.69763	11.4566	9.82811	nan
ENSCDRG00005004231	ENSCDRG00005004231	80.2127	0.771924	0.348012	2.2181	0.026548	0.375776	88.6541	68.1569	52.075	53.0207	40.2935	189.245	107.065	53.2913	79.4804	70.8443	nan
PHLPP2	ENSCDRG00005008245	163.063	-0.585296	0.263987	-2.21714	0.0266133	0.375776	127.44	140.265	259.267	220.828	229.468	120.879	74.2902	162.835	115.998	179.363	PH domain and leucine rich repeat protein phosphatase 2 [Source:HGNC Symbol;Acc:HGNC:29149]
PLAAT3	ENSCDRG00005019659	134.282	0.452981	0.204281	2.21744	0.0265933	0.375776	66.4905	134.338	117.446	120.8	116.1	172.402	131.1	156.913	201.923	125.308	HRAS-like suppressor 3 [Source:NCBI gene;Acc:105101524]
ENSCDRG00005015890	ENSCDRG00005015890	79.5925	0.581723	0.262327	2.21755	0.0265856	0.375776	55.4088	92.8514	48.7511	61.2198	61.4647	94.1273	52.4402	101.253	114.566	113.842	caveolae associated protein 3 [Source:NCBI gene;Acc:105097919]
FBXO44	ENSCDRG00005016863	158.444	-0.39255	0.177043	-2.21726	0.0266054	0.375776	132.981	173.849	223.812	194.591	163.906	163.484	146.395	129.675	115.282	140.46	F-box protein 44 [Source:NCBI gene;Acc:105107029]
BAALC	ENSCDRG00005016307	157.316	0.51905	0.23387	2.21939	0.0264599	0.375776	94.1949	149.155	105.258	121.893	167.321	261.575	168.246	162.835	211.232	131.451	BAALC binder of MAP3K1 and KLF4 [Source:HGNC Symbol;Acc:HGNC:14333]
MYC	ENSCDRG00005005140	23.4478	0.798595	0.360201	2.21708	0.0266176	0.375776	22.1635	24.6945	15.5117	10.9321	15.0247	33.6877	30.5901	33.159	20.0491	28.6653	MYC proto-oncogene, bHLH transcription factor [Source:NCBI gene;Acc:105096445]
TBXAS1	ENSCDRG00005003325	45.3994	0.797447	0.359746	2.21669	0.0266441	0.375828	27.7044	50.3768	29.9154	33.3429	23.9029	85.21	32.7751	39.0803	86.6408	45.0455	thromboxane A synthase 1 [Source:NCBI gene;Acc:105091642]
COL25A1	ENSCDRG00005010697	39.2721	-1.10801	0.500109	-2.21555	0.0267226	0.375949	94.1949	53.3402	80.8825	9.29229	32.7812	12.8806	39.3301	24.2771	23.6293	22.1132	collagen type XXV alpha 1 chain [Source:NCBI gene;Acc:105089894]
RIPK3	ENSCDRG00005006625	24.2895	-1.07745	0.486366	-2.21531	0.0267389	0.375949	49.8679	31.609	48.7511	9.29229	27.3176	26.752	13.11	11.8425	15.7529	8.59959	receptor interacting serine/threonine kinase 3 [Source:HGNC Symbol;Acc:HGNC:10021]
ACTN2	ENSCDRG00005008706	26.5076	-0.879364	0.396962	-2.21523	0.0267441	0.375949	44.327	27.6579	38.7793	29.5167	36.1959	6.9357	8.74003	26.0535	21.4812	25.3893	actinin alpha 2 [Source:NCBI gene;Acc:105088822]
ENSCDRG00005016399	ENSCDRG00005016399	43.359	-1.25953	0.568468	-2.21566	0.0267149	0.375949	166.226	40.499	73.1266	15.8515	17.0735	29.7244	10.925	23.685	40.0982	16.3802	nan
MAGED1	ENSCDRG00005020123	1166.07	0.452305	0.20431	2.21382	0.0268413	0.37635	875.459	713.178	956.186	1276.87	1092.02	1023.51	1769.86	1290.83	1029.66	1633.1	MAGE family member D1 [Source:HGNC Symbol;Acc:HGNC:6813]
TGFB3	ENSCDRG00005001558	37.3228	-0.700068	0.31621	-2.21394	0.0268332	0.37635	60.9497	44.4502	50.967	28.4235	47.1229	22.7887	39.3301	27.8299	32.9378	18.4277	transforming growth factor beta 3 [Source:NCBI gene;Acc:105086078]
TPPP3	ENSCDRG00005011501	205.964	-0.571846	0.258257	-2.21425	0.0268117	0.37635	121.899	204.471	296.938	359.666	240.395	115.925	142.025	217.902	179.01	181.411	tubulin polymerization promoting protein family member 3 [Source:HGNC Symbol;Acc:HGNC:24162]
METTL4	ENSCDRG00005020546	26.1671	-1.2803	0.57855	-2.21295	0.0269013	0.37687	105.277	23.7067	5.5399	23.504	34.147	12.8806	6.55502	18.948	11.4566	19.6562	methyltransferase like 4 [Source:HGNC Symbol;Acc:HGNC:24726]
GPRIN3	ENSCDRG00005001337	36.5184	-0.869564	0.393586	-2.20934	0.0271511	0.377051	22.1635	40.499	83.0984	30.0633	60.0988	28.7336	8.74003	27.8299	33.6539	30.3033	GPRIN family member 3 [Source:HGNC Symbol;Acc:HGNC:27733]
ENSCDRG00005006558	ENSCDRG00005006558	64.5804	0.610626	0.276274	2.21022	0.0270899	0.377051	38.7861	57.2913	50.967	60.6732	47.1229	69.357	43.7001	90.0031	71.604	116.299	zinc finger CCHC-type containing 18 [Source:NCBI gene;Acc:105099076]
SLC27A6	ENSCDRG00005003065	15.6825	-1.27342	0.575708	-2.21192	0.0269721	0.377051	38.7861	24.6945	25.4835	14.7583	8.87823	3.96326	10.925	11.8425	15.0368	2.45703	solute carrier family 27 member 6 [Source:HGNC Symbol;Acc:HGNC:11000]
OTULINL	ENSCDRG00005002746	119.313	0.64913	0.293841	2.20912	0.0271664	0.377051	66.4905	129.399	69.8027	109.321	83.3188	241.759	128.915	87.6346	158.961	117.528	OTU deubiquitinase with linear linkage specificity like [Source:HGNC Symbol;Acc:HGNC:25629]
ENSCDRG00005002417	ENSCDRG00005002417	109.83	-0.412376	0.186558	-2.21044	0.0270746	0.377051	160.685	102.729	145.145	102.215	122.929	92.1457	104.88	89.4109	90.937	87.2245	nan
DNAH11	ENSCDRG00005006248	150.104	-0.377704	0.170936	-2.20962	0.0271312	0.377051	121.899	177.801	170.629	206.07	159.808	148.622	133.285	119.017	143.924	119.985	dynein axonemal heavy chain 11 [Source:HGNC Symbol;Acc:HGNC:2942]
FKBP2	ENSCDRG00005018432	138.296	0.453001	0.204967	2.21012	0.027097	0.377051	94.1949	117.546	137.389	121.893	103.124	122.861	229.426	168.756	134.615	153.155	FKBP prolyl isomerase 2 [Source:NCBI gene;Acc:105101543]
ENSCDRG00005009589	ENSCDRG00005009589	15.953	-1.88399	0.852478	-2.21002	0.0271037	0.377051	88.6541	13.8289	13.2958	4.91945	8.19529	13.8714	0	5.92125	10.0246	0.819009	olfactory receptor 2AP1-like [Source:NCBI gene;Acc:105100966]
IP6K2	ENSCDRG00005003526	99.439	0.453253	0.205088	2.21004	0.0271026	0.377051	66.4905	89.8881	84.2064	96.2025	74.4406	113.944	148.58	107.767	85.9248	126.946	inositol hexakisphosphate kinase 2 [Source:NCBI gene;Acc:105087885]
ADAM15	ENSCDRG00005004551	148.998	-0.394166	0.17836	-2.20995	0.0271089	0.377051	193.931	187.678	188.356	133.918	149.564	153.576	113.62	132.636	119.579	117.118	ADAM metallopeptidase domain 15 [Source:HGNC Symbol;Acc:HGNC:193]
LPAR5	ENSCDRG00005018243	38.6228	1.01499	0.459114	2.21077	0.027052	0.377051	33.2453	35.5601	12.1878	22.4108	25.9518	113.944	48.0702	24.8693	42.9624	27.0273	lysophosphatidic acid receptor 5 [Source:HGNC Symbol;Acc:HGNC:13307]
OR6N1	ENSCDRG00005010200	5.60421	-2.10838	0.954775	-2.20825	0.0272268	0.377571	16.6226	2.96334	22.1596	3.82624	1.36588	0.990814	0	4.737	2.14812	1.22851	olfactory receptor 6N1 [Source:NCBI gene;Acc:105086555]
MGAM	ENSCDRG00005005484	45.5543	-1.07186	0.485486	-2.20782	0.027257	0.377672	138.522	62.2302	56.5069	20.771	36.8788	25.7612	24.0351	33.7512	47.2586	9.82811	maltase-glucoamylase [Source:NCBI gene;Acc:105097331]
TRIM46	ENSCDRG00005005427	122.637	-0.553098	0.250588	-2.2072	0.0273001	0.37795	249.34	126.436	141.821	122.44	99.7094	85.21	131.1	87.0424	106.69	76.5773	tripartite motif containing 46 [Source:HGNC Symbol;Acc:HGNC:19019]
ELFN2	ENSCDRG00005008304	142.582	-0.50844	0.230428	-2.2065	0.027349	0.378309	210.553	167.923	159.549	149.223	148.198	121.87	187.911	108.359	83.7766	88.453	extracellular leucine rich repeat and fibronectin type III domain containing 2 [Source:HGNC Symbol;Acc:HGNC:29396]
CNGA1	ENSCDRG00005003141	5.57971	-2.47751	1.12323	-2.20571	0.0274041	0.378753	33.2453	5.92669	2.21596	0	6.14647	0.990814	4.37001	1.77638	0.71604	0.409505	cyclic nucleotide gated channel subunit alpha 1 [Source:NCBI gene;Acc:105099941]
ENSCDRG00005008707	ENSCDRG00005008707	9.97854	-2.04303	0.926666	-2.20471	0.0274743	0.379061	60.9497	2.96334	5.5399	6.01266	6.82941	3.96326	4.37001	4.14488	5.01228	0	olfactory receptor 2G2-like [Source:NCBI gene;Acc:105093486]
FGF7	ENSCDRG00005019583	7.81898	-1.50277	0.681759	-2.20425	0.0275069	0.379061	22.1635	14.8167	13.2958	7.10587	2.73176	1.98163	2.18501	2.96063	6.44436	4.50455	fibroblast growth factor 7 [Source:NCBI gene;Acc:105104761]
FAM160B1	ENSCDRG00005020701	144.201	0.404766	0.183624	2.20432	0.027502	0.379061	110.818	105.693	111.906	162.342	126.344	160.512	139.84	188.888	157.529	178.134	family with sequence similarity 160 member B1 [Source:HGNC Symbol;Acc:HGNC:29320]
SEZ6	ENSCDRG00005010938	254.149	-0.661085	0.299937	-2.20408	0.0275186	0.379061	155.145	191.63	423.248	460.788	314.836	132.769	294.976	212.573	153.232	202.295	seizure related 6 homolog [Source:NCBI gene;Acc:105088163]
TLR6	ENSCDRG00005010208	41.9479	0.962417	0.438083	2.19688	0.028029	0.380573	27.7044	35.5601	6.64788	25.1438	46.44	88.1825	39.3301	45.5937	70.8879	33.9889	toll like receptor 6 [Source:HGNC Symbol;Acc:HGNC:16711]
SUSD6	ENSCDRG00005003434	250.157	0.524768	0.23881	2.19743	0.0279895	0.380573	221.635	237.067	196.112	187.486	183.028	457.756	360.526	197.77	231.281	228.913	sushi domain containing 6 [Source:HGNC Symbol;Acc:HGNC:19956]
ENSCDRG00005007225	ENSCDRG00005007225	12.7018	-1.36576	0.621177	-2.19866	0.027902	0.380573	49.8679	8.89003	19.9436	10.9321	6.14647	2.97244	6.55502	10.6583	5.72832	5.32356	nan
SH2D4B	ENSCDRG00005007650	14.6548	-1.18924	0.540434	-2.20052	0.0277697	0.380573	38.7861	17.7801	22.1596	7.10587	17.7565	6.9357	13.11	2.96063	12.1727	7.78059	SH2 domain containing 4B [Source:NCBI gene;Acc:105092411]
TMEM30A	ENSCDRG00005020603	334.084	0.689887	0.314023	2.19693	0.0280255	0.380573	171.767	179.776	197.22	406.674	317.568	309.134	198.836	531.729	402.414	625.723	transmembrane protein 30A [Source:NCBI gene;Acc:105105365]
AP1G1	ENSCDRG00005008004	282.118	0.331226	0.150452	2.20154	0.0276981	0.380573	243.799	278.554	188.356	276.582	261.566	292.29	286.236	334.551	316.49	342.755	adaptor related protein complex 1 subunit gamma 1 [Source:NCBI gene;Acc:105088378]
LATS2	ENSCDRG00005017071	127.129	0.540929	0.245918	2.19963	0.0278333	0.380573	88.6541	119.522	95.2862	102.215	103.124	168.438	246.906	118.425	109.554	119.166	large tumor suppressor kinase 2 [Source:HGNC Symbol;Acc:HGNC:6515]
CCDC27	ENSCDRG00005014859	13.6227	-1.64308	0.747782	-2.19727	0.0280009	0.380573	60.9497	5.92669	28.8075	4.91945	5.46353	4.95407	6.55502	4.737	11.4566	2.45703	coiled-coil domain containing 27 [Source:HGNC Symbol;Acc:HGNC:26546]
CAMK2N1	ENSCDRG00005008612	31.6962	-0.715698	0.325642	-2.1978	0.027963	0.380573	38.7861	58.2791	36.5633	36.6225	26.6347	22.7887	26.2201	31.9748	18.617	20.4752	calcium/calmodulin dependent protein kinase II inhibitor 1 [Source:NCBI gene;Acc:105088851]
SRSF4	ENSCDRG00005014921	132.997	0.379318	0.172679	2.19666	0.0280449	0.380573	94.1949	114.583	139.605	112.601	109.953	180.328	152.95	131.452	157.529	136.775	serine and arginine rich splicing factor 4 [Source:HGNC Symbol;Acc:HGNC:10786]
SP7	ENSCDRG00005005094	13.2564	-1.80381	0.820257	-2.19908	0.027872	0.380573	66.4905	8.89003	17.7277	4.91945	6.14647	2.97244	13.11	4.737	7.1604	0.409505	Sp7 transcription factor [Source:HGNC Symbol;Acc:HGNC:17321]
SLC38A10	ENSCDRG00005012346	447.131	0.395828	0.180048	2.19846	0.027916	0.380573	454.352	322.017	440.976	358.573	359.227	494.416	690.462	535.874	389.526	425.885	solute carrier family 38 member 10 [Source:HGNC Symbol;Acc:HGNC:28237]
SMARCD2	ENSCDRG00005021130	62.4967	0.63337	0.288194	2.19772	0.0279692	0.380573	38.7861	55.3157	62.0468	41.542	45.0741	127.815	58.9952	59.8047	73.7521	61.8352	SWI/SNF related, matrix associated, actin dependent regulator of chromatin, subfamily d, member 2 [Source:HGNC Symbol;Acc:HGNC:11107]
ENSCDRG00005010597	ENSCDRG00005010597	7.13167	-2.49303	1.1336	-2.19922	0.0278621	0.380573	27.7044	1.97556	29.9154	2.18642	0	0.990814	0	4.14488	3.5802	0.819009	nan
TATDN3	ENSCDRG00005018011	18.1254	-1.10486	0.502035	-2.20076	0.027753	0.380573	22.1635	23.7067	14.4037	19.6778	45.0741	4.95407	4.37001	18.3559	17.901	10.6471	TatD DNase domain containing 3 [Source:HGNC Symbol;Acc:HGNC:27010]
SLC44A2	ENSCDRG00005007784	493.153	0.245934	0.111854	2.19871	0.0278983	0.380573	459.893	421.783	436.544	492.491	440.497	532.067	605.247	495.609	507.672	539.727	solute carrier family 44 member 2 [Source:HGNC Symbol;Acc:HGNC:17292]
KSR2	ENSCDRG00005016782	163.872	-0.553241	0.251852	-2.19669	0.0280424	0.380573	277.044	140.265	227.136	138.291	194.638	116.916	207.576	103.03	125.307	108.519	kinase suppressor of ras 2 [Source:HGNC Symbol;Acc:HGNC:18610]
TIGAR	ENSCDRG00005022425	76.3403	0.460318	0.20944	2.19785	0.0279598	0.380573	83.1132	64.2058	48.7511	63.4062	70.3429	82.2376	69.9202	94.148	84.4927	102.786	TP53 induced glycolysis regulatory phosphatase [Source:HGNC Symbol;Acc:HGNC:1185]
PROS1	ENSCDRG00005003101	138.743	0.533062	0.242932	2.19429	0.0282147	0.381644	94.1949	110.631	72.0186	132.825	152.979	181.319	122.36	132.044	213.38	175.677	protein S [Source:HGNC Symbol;Acc:HGNC:9456]
ELAPOR1	ENSCDRG00005002813	193.245	0.561924	0.256053	2.19457	0.0281948	0.381644	271.503	120.509	117.446	170.541	120.881	193.209	211.946	290.734	159.677	276.006	KIAA1324 ortholog [Source:NCBI gene;Acc:105085633]
MAP3K12	ENSCDRG00005004763	214.297	-0.433425	0.197441	-2.19522	0.028148	0.381644	360.157	208.422	267.023	219.735	189.175	175.374	214.131	179.414	137.48	192.058	mitogen-activated protein kinase kinase kinase 12 [Source:NCBI gene;Acc:105094560]
ENSCDRG00005021998	ENSCDRG00005021998	517.572	-0.26107	0.118979	-2.19426	0.0282167	0.381644	548.547	479.074	647.06	550.431	593.476	476.582	482.887	457.713	446.093	493.862	nan
PAX2	ENSCDRG00005018578	10.5226	-2.1404	0.97582	-2.19344	0.0282757	0.381815	60.9497	5.92669	12.1878	0	9.56117	1.98163	0	5.92125	5.01228	3.68554	paired box 2 [Source:NCBI gene;Acc:105084326]
ST3GAL4	ENSCDRG00005018408	81.056	-0.419582	0.191285	-2.19349	0.0282722	0.381815	77.5723	107.668	93.0703	91.283	94.2458	74.3111	50.2552	72.2393	79.4804	70.4348	ST3 beta-galactoside alpha-2,3-sialyltransferase 4 [Source:HGNC Symbol;Acc:HGNC:10864]
C3	ENSCDRG00005018821	3050.86	1.06705	0.486608	2.19284	0.0283188	0.382083	1108.18	3414.76	1273.07	1528.85	2526.88	7789.78	3810.65	2681.74	4712.97	1661.77	complement C3 [Source:NCBI gene;Acc:105104550]
SLC7A8	ENSCDRG00005010040	173.267	0.535361	0.244181	2.19247	0.0283453	0.382128	193.931	109.644	149.577	107.681	156.393	284.364	207.576	129.083	167.553	226.866	solute carrier family 7 member 8 [Source:NCBI gene;Acc:105096984]
BEX5	ENSCDRG00005014289	423.211	0.461662	0.210633	2.19178	0.0283956	0.382247	304.748	234.104	368.957	459.148	407.716	389.39	456.666	588.573	408.143	614.666	brain expressed X-linked 5 [Source:NCBI gene;Acc:105103535]
IQCA1	ENSCDRG00005014153	32.5811	-0.748094	0.341416	-2.19115	0.028441	0.382247	38.7861	38.5235	39.8873	44.275	45.757	20.8071	8.74003	41.4488	22.1972	25.3893	IQ motif containing with AAA domain 1 [Source:HGNC Symbol;Acc:HGNC:26195]
RHOB	ENSCDRG00005005629	128.403	-0.536422	0.244779	-2.19145	0.0284191	0.382247	132.981	183.727	140.713	153.596	152.979	98.0906	45.8851	141.518	123.159	111.385	ras homolog family member B [Source:HGNC Symbol;Acc:HGNC:668]
MSC	ENSCDRG00005010164	6.51339	-1.97305	0.900496	-2.19106	0.0284471	0.382247	27.7044	4.93891	14.4037	1.63982	3.4147	1.98163	6.55502	2.96063	0.71604	0.819009	musculin [Source:HGNC Symbol;Acc:HGNC:7321]
PDE10A	ENSCDRG00005009275	120.017	0.419797	0.191651	2.19043	0.0284934	0.382556	105.277	90.8759	107.474	106.041	106.539	183.301	98.3253	136.781	135.331	130.222	phosphodiesterase 10A [Source:NCBI gene;Acc:105086282]
RNFT2	ENSCDRG00005015578	166.347	-0.421578	0.192556	-2.18938	0.0285692	0.38326	188.39	157.057	183.925	210.99	214.443	103.045	128.915	171.124	133.183	172.401	ring finger protein, transmembrane 2 [Source:NCBI gene;Acc:105104918]
GLS2	ENSCDRG00005007217	114.422	-0.476572	0.217712	-2.189	0.0285967	0.383317	188.39	117.546	149.577	101.669	120.881	66.3845	89.5853	96.5165	111.702	101.967	glutaminase 2 [Source:NCBI gene;Acc:105086356]
CRYGS	ENSCDRG00005004952	7.46783	1.81194	0.828964	2.18578	0.0288314	0.383454	0	4.93891	0	7.65247	1.36588	5.94488	26.2201	5.32913	15.0368	8.19009	crystallin gamma S [Source:HGNC Symbol;Acc:HGNC:2417]
CD200	ENSCDRG00005015031	194.474	-0.500752	0.228991	-2.18678	0.0287587	0.383454	182.849	170.886	210.516	343.268	229.468	136.732	128.915	190.664	147.504	203.933	CD200 molecule [Source:HGNC Symbol;Acc:HGNC:7203]
PLAGL1	ENSCDRG00005009030	106.87	0.761385	0.348255	2.18629	0.0287946	0.383454	66.4905	105.693	55.399	76.5247	89.4653	268.511	104.88	75.1999	144.64	81.9009	PLAG1 like zinc finger 1 [Source:HGNC Symbol;Acc:HGNC:9046]
SOAT2	ENSCDRG00005005839	13.8409	-1.31381	0.601038	-2.1859	0.0288227	0.383454	33.2453	21.7312	34.3474	5.46605	6.14647	6.9357	6.55502	10.0661	8.59248	5.32356	sterol O-acyltransferase 2 [Source:NCBI gene;Acc:105094576]
ZFP36L2	ENSCDRG00005021403	260.471	0.525433	0.240383	2.18581	0.0288293	0.383454	171.767	285.469	182.817	201.697	219.907	479.554	255.646	238.627	350.143	219.085	ZFP36 ring finger protein like 2 [Source:HGNC Symbol;Acc:HGNC:1108]
CYP24A1	ENSCDRG00005016933	10.2255	-1.77517	0.812189	-2.18567	0.02884	0.383454	49.8679	10.8656	12.1878	2.18642	5.46353	4.95407	8.74003	5.32913	1.43208	1.22851	1,25-dihydroxyvitamin D(3) 24-hydroxylase, mitochondrial [Source:NCBI gene;Acc:105098859]
PRKACA	ENSCDRG00005015856	235.065	-0.376753	0.172221	-2.18761	0.028698	0.383454	310.289	214.349	271.455	250.892	288.201	168.438	214.131	248.101	166.121	218.675	protein kinase cAMP-activated catalytic subunit alpha [Source:NCBI gene;Acc:105100776]
C2CD4C	ENSCDRG00005019452	15.3615	-1.19982	0.548438	-2.1877	0.0286915	0.383454	55.4088	9.87781	23.2676	9.29229	14.3418	8.91733	6.55502	6.51338	12.8887	6.55207	C2 calcium dependent domain containing 4C [Source:HGNC Symbol;Acc:HGNC:29417]
IL1R2	ENSCDRG00005004827	5.6741	-2.25676	1.03247	-2.1858	0.0288304	0.383454	27.7044	13.8289	1.10798	2.73303	3.4147	0	0	3.55275	3.5802	0.819009	interleukin 1 receptor type 2 [Source:NCBI gene;Acc:105099111]
PRSS27	ENSCDRG00005016736	28.5097	-1.0171	0.464995	-2.18733	0.0287185	0.383454	88.6541	30.6212	37.6713	14.7583	25.2688	29.7244	15.295	15.9874	16.4689	10.6471	serine protease 27 [Source:HGNC Symbol;Acc:HGNC:15475]
TSPYL5	ENSCDRG00005021266	50.2951	-0.534154	0.244479	-2.18486	0.028899	0.383927	38.7861	71.1202	66.4788	62.8596	52.5865	39.6326	50.2552	42.633	31.5057	47.093	TSPY like 5 [Source:HGNC Symbol;Acc:HGNC:29367]
HIPK3	ENSCDRG00005018642	224.91	0.537437	0.246062	2.18416	0.0289507	0.384304	105.277	190.642	116.338	268.93	224.005	267.52	201.021	280.075	279.971	315.318	homeodomain interacting protein kinase 3 [Source:HGNC Symbol;Acc:HGNC:4915]
THEGL	ENSCDRG00005001451	14.7509	-1.18173	0.541203	-2.18353	0.0289971	0.384553	38.7861	13.8289	27.6995	6.55926	19.8053	7.92651	4.37001	8.88188	5.72832	13.9232	theg spermatid protein like [Source:HGNC Symbol;Acc:HGNC:43771]
C1R	ENSCDRG00005019633	90.1715	0.553232	0.253396	2.18327	0.0290162	0.384553	49.8679	69.1447	96.3942	81.4442	64.1964	127.815	72.1052	94.148	153.232	93.367	complement C1r [Source:NCBI gene;Acc:105098187]
DENND2C	ENSCDRG00005005062	21.6635	-1.43226	0.656412	-2.18195	0.0291131	0.385526	94.1949	20.7434	19.9436	6.55926	22.5371	5.94488	2.18501	18.948	18.617	6.96158	DENN domain containing 2C [Source:NCBI gene;Acc:105089632]
ATP1A1	ENSCDRG00005003442	1230.06	-0.309608	0.141965	-2.18088	0.0291926	0.386137	1146.96	1199.17	1347.3	1657.31	1444.42	895.696	1125.28	1210.3	1052.58	1221.55	ATPase Na+/K+ transporting subunit alpha 1 [Source:NCBI gene;Acc:105089616]
ANKS1B	ENSCDRG00005017933	109.217	-0.454505	0.208436	-2.18055	0.0292168	0.386137	105.277	135.326	118.554	136.105	134.539	76.2927	87.4003	92.9637	75.9002	129.813	ankyrin repeat and sterile alpha motif domain containing 1B [Source:NCBI gene;Acc:105097443]
ENSCDRG00005007341	ENSCDRG00005007341	22.117	-1.40363	0.643756	-2.18037	0.0292297	0.386137	94.1949	23.7067	25.4835	7.65247	12.9759	2.97244	19.6651	10.0661	17.901	6.55207	nan
ENSCDRG00005016081	ENSCDRG00005016081	114.923	0.741708	0.340243	2.17993	0.0292624	0.386259	55.4088	125.448	105.258	81.4442	58.7329	275.446	76.4752	103.622	142.492	124.899	nan
MSMO1	ENSCDRG00005011836	161.656	0.423511	0.194322	2.17943	0.0293	0.386446	138.522	133.35	104.15	146.49	170.735	178.347	131.1	197.77	196.195	219.904	methylsterol monooxygenase 1 [Source:NCBI gene;Acc:105087398]
GGT7	ENSCDRG00005013179	283.718	0.354324	0.162682	2.17801	0.029405	0.38752	315.83	236.08	232.676	232.854	236.298	292.29	426.076	295.471	267.799	301.805	gamma-glutamyltransferase 7 [Source:HGNC Symbol;Acc:HGNC:4259]
ENSCDRG00005004009	ENSCDRG00005004009	106.179	0.547788	0.251717	2.17621	0.0295398	0.388052	33.2453	82.9736	76.4506	112.601	113.368	138.714	87.4003	126.715	145.356	144.965	nan
GPM6B	ENSCDRG00005011951	650.598	0.327636	0.150542	2.17637	0.0295276	0.388052	426.648	738.86	494.159	577.215	628.989	759.954	686.092	701.669	793.372	699.024	glycoprotein M6B [Source:HGNC Symbol;Acc:HGNC:4461]
SLC38A11	ENSCDRG00005004992	11.4292	-1.88121	0.864259	-2.17667	0.029505	0.388052	60.9497	14.8167	11.0798	1.09321	4.09765	1.98163	6.55502	5.32913	7.1604	1.22851	solute carrier family 38 member 11 [Source:NCBI gene;Acc:105091044]
TEPP	ENSCDRG00005005268	5.61249	-2.58638	1.18817	-2.17678	0.0294971	0.388052	16.6226	4.93891	23.2676	0	4.09765	0	0	1.77638	5.01228	0.409505	testis, prostate and placenta expressed [Source:NCBI gene;Acc:105093803]
GALNT16	ENSCDRG00005003252	478.51	-0.486773	0.223838	-2.17466	0.0296555	0.388738	559.629	469.196	640.412	572.295	545.67	221.942	594.322	455.345	331.526	394.762	polypeptide N-acetylgalactosaminyltransferase 16 [Source:HGNC Symbol;Acc:HGNC:23233]
UNC119	ENSCDRG00005014139	40.6748	-0.637082	0.292945	-2.17475	0.0296489	0.388738	88.6541	48.4013	38.7793	48.1012	32.0982	29.7244	30.5901	26.6456	32.2218	31.5318	unc-119 lipid binding chaperone [Source:HGNC Symbol;Acc:HGNC:12565]
GEM	ENSCDRG00005021094	68.996	0.594786	0.27352	2.17456	0.0296629	0.388738	49.8679	40.499	83.0984	61.2198	39.6106	109.98	74.2902	74.6078	65.8756	90.91	GTP binding protein overexpressed in skeletal muscle [Source:HGNC Symbol;Acc:HGNC:4234]
ENSCDRG00005020939	ENSCDRG00005020939	9.82846	1.91277	0.879966	2.17368	0.0297288	0.388836	0	5.92669	8.86383	3.82624	0	7.92651	43.7001	5.32913	18.617	4.09505	nan
ENSCDRG00005017359	ENSCDRG00005017359	106.766	-0.55253	0.254215	-2.17347	0.0297447	0.388836	221.635	121.497	84.2064	99.4821	120.198	104.035	91.7703	77.5684	63.7275	83.5389	nan
ENSCDRG00005005197	ENSCDRG00005005197	84.9149	0.487849	0.224452	2.17351	0.0297418	0.388836	55.4088	99.7659	64.2628	66.1392	61.4647	110.971	117.99	101.846	93.0851	78.2154	nan
EPRS1	ENSCDRG00005017058	538.179	0.470512	0.216506	2.1732	0.0297649	0.388836	482.056	378.32	356.769	603.999	439.814	439.921	480.702	796.409	592.165	811.638	glutamyl-prolyl-tRNA synthetase 1 [Source:NCBI gene;Acc:105100321]
OR13G1	ENSCDRG00005008668	6.52115	-2.02338	0.932719	-2.16934	0.0300569	0.388872	38.7861	4.93891	5.5399	2.73303	2.04882	0.990814	4.37001	3.55275	1.43208	0.819009	olfactory receptor 13G1 [Source:NCBI gene;Acc:105093508]
ENSCDRG00005001507	ENSCDRG00005001507	6.24761	1.67663	0.773097	2.16872	0.0301037	0.388872	0	3.95112	3.32394	0	6.14647	11.8898	10.925	7.10551	12.1727	6.96158	nan
CPS1	ENSCDRG00005011935	17.0038	-1.53797	0.709353	-2.16813	0.0301484	0.388872	55.4088	18.7678	38.7793	6.55926	8.87823	1.98163	10.925	14.211	12.8887	1.63802	carbamoyl-phosphate synthase 1 [Source:HGNC Symbol;Acc:HGNC:2323]
IGFBP2	ENSCDRG00005016370	9.18263	-1.40072	0.646594	-2.16631	0.0302879	0.388872	33.2453	11.8534	6.64788	6.55926	10.9271	1.98163	6.55502	1.77638	5.72832	6.55207	insulin like growth factor binding protein 2 [Source:HGNC Symbol;Acc:HGNC:5471]
5S_rRNA	ENSCDRG00005015197	21.7835	-1.57007	0.724381	-2.16747	0.0301989	0.388872	105.277	16.7923	22.1596	6.01266	14.3418	14.8622	24.0351	4.737	7.1604	2.45703	5S ribosomal RNA [Source:RFAM;Acc:RF00001]
HIF3A	ENSCDRG00005011604	83.9102	0.780897	0.360094	2.16859	0.0301137	0.388872	66.4905	53.3402	78.6665	42.0886	66.2453	87.1916	214.131	45.0015	85.2087	100.738	hypoxia inducible factor 3 subunit alpha [Source:HGNC Symbol;Acc:HGNC:15825]
ENSCDRG00005004308	ENSCDRG00005004308	16.3527	1.11508	0.514711	2.16642	0.0302792	0.388872	5.54088	13.8289	4.43192	16.3982	7.51235	21.7979	43.7001	11.8425	22.9133	15.5612	nan
IL12RB2	ENSCDRG00005006997	14.8369	-1.51955	0.701385	-2.16649	0.0302734	0.388872	44.327	23.7067	22.1596	11.4787	11.61	1.98163	0	9.47401	20.7651	2.86653	interleukin 12 receptor subunit beta 2 [Source:HGNC Symbol;Acc:HGNC:5972]
NUP188	ENSCDRG00005001373	201.979	0.464782	0.214405	2.16778	0.0301756	0.388872	116.358	198.544	115.23	189.125	219.224	282.382	181.356	221.455	240.589	255.531	nucleoporin 188 [Source:NCBI gene;Acc:105092554]
AGAP2	ENSCDRG00005019817	228.963	-0.36227	0.167224	-2.16638	0.0302822	0.388872	182.849	300.285	259.267	243.239	283.42	188.255	264.386	185.927	199.775	182.23	ArfGAP with GTPase domain, ankyrin repeat and PH domain 2 [Source:HGNC Symbol;Acc:HGNC:16921]
IGFBP6	ENSCDRG00005006043	41.4166	-0.585119	0.269658	-2.16986	0.0300176	0.388872	66.4905	54.328	33.2394	55.2071	42.3423	31.706	32.7751	31.9748	38.6661	27.4368	insulin like growth factor binding protein 6 [Source:HGNC Symbol;Acc:HGNC:5475]
NTN4	ENSCDRG00005019926	44.4499	0.682745	0.314599	2.17021	0.0299912	0.388872	27.7044	30.6212	34.3474	54.6605	21.8541	49.5407	37.1451	65.7259	65.1596	57.7401	netrin 4 [Source:HGNC Symbol;Acc:HGNC:13658]
GFPT1	ENSCDRG00005008607	261.959	0.450188	0.207514	2.16944	0.0300493	0.388872	254.88	157.057	165.089	273.303	262.249	255.63	275.311	325.077	271.379	379.611	glutamine--fructose-6-phosphate transaminase 1 [Source:HGNC Symbol;Acc:HGNC:4241]
ACBD4	ENSCDRG00005004928	73.2448	0.797312	0.367631	2.16878	0.0300994	0.388872	55.4088	64.2058	38.7793	51.3809	53.9523	84.2192	205.391	49.1464	64.4436	65.5207	acyl-CoA binding domain containing 4 [Source:HGNC Symbol;Acc:HGNC:23337]
RPN1	ENSCDRG00005010840	897.337	0.397747	0.18355	2.16698	0.0302367	0.388872	592.874	696.386	774.477	940.707	853.676	780.761	1057.54	1275.44	798.384	1203.12	ribophorin I [Source:NCBI gene;Acc:105090118]
ENSCDRG00005010493	ENSCDRG00005010493	407.52	0.453309	0.208776	2.17127	0.0299107	0.388872	332.453	373.381	360.093	301.179	348.983	717.349	526.587	333.959	393.822	387.391	SLIT-ROBO Rho GTPase activating protein 2 [Source:NCBI gene;Acc:105098615]
ULK3	ENSCDRG00005004725	117.454	0.452	0.208121	2.17181	0.0298697	0.388872	72.0314	109.644	124.094	80.3509	101.758	167.448	152.95	113.688	111.702	140.87	unc-51 like kinase 3 [Source:NCBI gene;Acc:105087255]
ENSCDRG00005009868	ENSCDRG00005009868	152.89	-0.337332	0.155421	-2.17044	0.0299732	0.388872	182.849	175.825	181.709	161.795	155.028	156.549	128.915	140.926	113.85	131.451	nan
RECQL	ENSCDRG00005018445	75.9015	0.698901	0.321849	2.17152	0.0298917	0.388872	60.9497	47.4135	34.3474	74.3383	74.4406	70.3478	50.2552	116.649	87.3568	142.917	RecQ like helicase [Source:NCBI gene;Acc:105096487]
MSRA	ENSCDRG00005009111	48.7406	0.582669	0.268579	2.16945	0.0300482	0.388872	16.6226	58.2791	43.2112	37.1691	33.4641	52.5131	56.8102	63.3574	55.135	70.8443	methionine sulfoxide reductase A [Source:HGNC Symbol;Acc:HGNC:7377]
ENSCDRG00005011773	ENSCDRG00005011773	26.7008	-1.07604	0.496372	-2.1678	0.0301737	0.388872	16.6226	24.6945	28.8075	72.1519	37.5618	3.96326	15.295	26.0535	16.4689	25.3893	nan
ENSCDRG00005007245	ENSCDRG00005007245	34.2838	-0.777816	0.358129	-2.17189	0.029864	0.388872	60.9497	66.1813	38.7793	21.3176	32.7812	26.752	24.0351	24.8693	27.9255	19.2467	nan
PTPN21	ENSCDRG00005003261	185	0.535081	0.247228	2.16432	0.0304395	0.390087	94.1949	216.324	167.305	115.334	149.564	250.676	299.346	180.598	225.552	151.107	protein tyrosine phosphatase non-receptor type 21 [Source:NCBI gene;Acc:105096756]
SLC15A3	ENSCDRG00005011095	34.1636	1.0726	0.495623	2.16414	0.0304537	0.390087	11.0818	37.5357	18.8356	16.9448	21.1712	75.3019	80.8453	21.9086	43.6784	14.3327	solute carrier family 15 member 3 [Source:NCBI gene;Acc:105094890]
UBE2T	ENSCDRG00005019866	27.0135	0.732796	0.338552	2.1645	0.0304259	0.390087	16.6226	13.8289	14.4037	31.7031	21.8541	29.7244	37.1451	34.3433	33.6539	36.8554	ubiquitin conjugating enzyme E2 T [Source:NCBI gene;Acc:105105924]
ENSCDRG00005011746	ENSCDRG00005011746	60.5587	0.634365	0.293217	2.16347	0.030505	0.390117	83.1132	35.5601	40.9952	44.8216	46.44	67.3754	39.3301	63.9496	84.4927	99.5096	glutaredoxin [Source:NCBI gene;Acc:105100890]
ENSCDRG00005007463	ENSCDRG00005007463	36.146	0.699984	0.323553	2.16343	0.0305081	0.390117	44.327	23.7067	12.1878	26.237	36.1959	39.6326	50.2552	36.7118	42.2463	49.9596	transmembrane protein 258 [Source:NCBI gene;Acc:105094874]
ENSCDRG00005017145	ENSCDRG00005017145	8.74173	-2.34968	1.08621	-2.16318	0.0305272	0.390117	38.7861	7.90225	19.9436	5.46605	1.36588	0.990814	4.37001	0	8.59248	0	nan
MZF1	ENSCDRG00005010781	35.2594	0.723647	0.334731	2.16187	0.0306279	0.390488	11.0818	46.4257	22.1596	25.1438	22.5371	62.4213	43.7001	38.4882	42.9624	37.6744	myeloid zinc finger 1 [Source:HGNC Symbol;Acc:HGNC:13108]
PADI6	ENSCDRG00005005429	6.76562	-2.37522	1.09878	-2.16168	0.0306428	0.390488	33.2453	7.90225	14.4037	0	2.73176	0.990814	0	2.96063	5.01228	0.409505	peptidyl arginine deiminase 6 [Source:NCBI gene;Acc:105107083]
MSRB3	ENSCDRG00005011240	14.9787	-1.08668	0.502796	-2.16128	0.0306734	0.390488	33.2453	10.8656	25.4835	13.1185	21.1712	2.97244	10.925	8.88188	15.7529	7.37108	methionine sulfoxide reductase B3 [Source:NCBI gene;Acc:105101098]
NRXN1	ENSCDRG00005022389	789.068	-0.460046	0.21286	-2.16126	0.0306749	0.390488	919.786	724.044	752.318	1191.6	984.801	466.673	563.732	841.41	555.647	890.672	neurexin 1 [Source:HGNC Symbol;Acc:HGNC:8008]
ITPR1	ENSCDRG00005006971	311.453	-0.37815	0.174893	-2.16218	0.0306043	0.390488	354.616	318.066	360.093	326.323	407.716	296.253	179.171	248.693	339.403	284.196	inositol 1,4,5-trisphosphate receptor type 1 [Source:HGNC Symbol;Acc:HGNC:6180]
TM9SF2	ENSCDRG00005017882	388.691	0.549041	0.254222	2.15969	0.0307968	0.391736	160.685	341.772	251.511	430.178	381.081	409.206	286.236	542.979	474.734	608.524	transmembrane 9 superfamily member 2 [Source:HGNC Symbol;Acc:HGNC:11865]
SMPD3	ENSCDRG00005017797	78.8892	-0.557544	0.258263	-2.15882	0.0308639	0.391983	138.522	115.57	73.1266	91.8296	56.6841	68.3662	72.1052	53.8834	65.1596	53.6451	sphingomyelin phosphodiesterase 3 [Source:HGNC Symbol;Acc:HGNC:14240]
ENSCDRG00005005641	ENSCDRG00005005641	31.5786	-0.706412	0.327197	-2.15898	0.0308515	0.391983	60.9497	35.5601	27.6995	34.9827	39.6106	20.8071	30.5901	30.7905	14.3208	20.4752	nan
TBC1D10C	ENSCDRG00005011591	12.9727	-1.45153	0.672546	-2.15826	0.0309079	0.39224	49.8679	5.92669	26.5915	3.82624	11.61	3.96326	8.74003	6.51338	8.59248	4.09505	TBC1 domain family member 10C [Source:HGNC Symbol;Acc:HGNC:24702]
ENSCDRG00005004175	ENSCDRG00005004175	82.3175	0.52594	0.243769	2.15753	0.0309642	0.392651	94.1949	77.0469	67.5867	61.7664	43.0253	90.1641	131.1	82.8976	95.9493	79.4439	nan
CAT	ENSCDRG00005017656	70.1895	0.599617	0.278105	2.15608	0.0310772	0.39355	33.2453	90.8759	54.291	50.8343	43.7082	119.889	78.6603	76.3842	82.3446	71.6633	catalase [Source:NCBI gene;Acc:105106806]
INHBE	ENSCDRG00005018362	5.44597	-2.64839	1.22838	-2.15601	0.031083	0.39355	22.1635	1.97556	17.7277	1.09321	4.78059	0.990814	0	0	5.72832	0	inhibin subunit beta E [Source:NCBI gene;Acc:105100347]
GNAQ	ENSCDRG00005010714	156.658	0.468683	0.217455	2.15531	0.0311376	0.393636	88.6541	134.338	96.3942	180.38	146.149	171.411	179.171	217.31	146.788	205.981	G protein subunit alpha q [Source:HGNC Symbol;Acc:HGNC:4390]
SLC35E3	ENSCDRG00005014826	77.4121	0.633017	0.293698	2.15534	0.0311356	0.393636	27.7044	50.3768	62.0468	86.3636	69.66	73.3202	63.3652	119.609	87.3568	134.317	solute carrier family 35 member E3 [Source:NCBI gene;Acc:105101087]
KIF19	ENSCDRG00005013340	30.1451	-0.894111	0.414968	-2.15465	0.0311892	0.393682	33.2453	47.4135	65.3708	19.1312	30.7323	35.6693	15.295	20.7244	20.7651	13.1041	kinesin family member 19 [Source:HGNC Symbol;Acc:HGNC:26735]
SH2D1B	ENSCDRG00005003706	50.2086	1.06597	0.4947	2.15478	0.031179	0.393682	5.54088	37.5357	32.1314	44.275	36.8788	169.429	21.8501	37.896	69.4558	47.093	SH2 domain containing 1B [Source:NCBI gene;Acc:105092695]
A4GALT	ENSCDRG00005005078	34.3481	0.95724	0.444618	2.15295	0.0313228	0.394764	11.0818	32.5968	23.2676	16.9448	27.3176	72.3294	80.8453	19.5401	30.0737	29.4843	alpha 1,4-galactosyltransferase (P blood group) [Source:HGNC Symbol;Acc:HGNC:18149]
CMTM6	ENSCDRG00005011417	95.2722	0.477846	0.221947	2.15298	0.0313206	0.394764	66.4905	88.9003	60.9389	96.2025	79.2211	125.833	122.36	76.3842	118.863	117.528	CKLF like MARVEL transmembrane domain containing 6 [Source:HGNC Symbol;Acc:HGNC:19177]
ENSCDRG00005000322	ENSCDRG00005000322	5.49115	-2.09504	0.973242	-2.15264	0.0313472	0.394769	22.1635	3.95112	13.2958	0.546605	6.14647	1.98163	0	3.55275	2.86416	0.409505	olfactory receptor 10V1-like [Source:NCBI gene;Acc:105094954]
ERLEC1	ENSCDRG00005022398	160.399	0.744213	0.34592	2.1514	0.0314445	0.395086	33.2453	108.656	98.6101	185.846	162.54	139.705	107.065	252.245	244.17	271.911	endoplasmic reticulum lectin 1 [Source:NCBI gene;Acc:105097699]
ENSCDRG00005016714	ENSCDRG00005016714	12.3928	-1.56249	0.726237	-2.15149	0.0314373	0.395086	44.327	17.7801	18.8356	3.82624	7.51235	3.96326	17.4801	3.55275	5.01228	1.63802	CD48 antigen-like [Source:NCBI gene;Acc:105102705]
ROCK1	ENSCDRG00005020081	183.187	0.561892	0.261132	2.15176	0.0314166	0.395086	66.4905	200.52	111.906	153.049	193.955	289.318	179.171	167.572	263.503	206.39	Rho associated coiled-coil containing protein kinase 1 [Source:NCBI gene;Acc:105086272]
SLC39A10	ENSCDRG00005013576	402.243	0.654386	0.304461	2.14933	0.0316085	0.396112	216.094	316.09	182.817	479.919	361.959	623.222	229.426	420.409	475.45	717.042	solute carrier family 39 member 10 [Source:NCBI gene;Acc:105088793]
PDGFD	ENSCDRG00005001697	79.5857	0.770248	0.358368	2.14932	0.0316089	0.396112	44.327	50.3768	43.2112	95.1093	58.7329	53.504	69.9202	131.452	75.1842	174.039	platelet derived growth factor D [Source:HGNC Symbol;Acc:HGNC:30620]
ALOX15B	ENSCDRG00005012862	12.7809	-1.52917	0.711485	-2.14926	0.0316136	0.396112	44.327	13.8289	17.7277	2.18642	17.0735	5.94488	15.295	6.51338	2.86416	2.04752	arachidonate 15-lipoxygenase type B [Source:HGNC Symbol;Acc:HGNC:434]
ENSCDRG00005021484	ENSCDRG00005021484	28.7266	0.815957	0.379665	2.14915	0.0316225	0.396112	11.0818	21.7312	13.2958	23.504	30.0494	62.4213	28.4051	36.7118	35.0859	24.9798	major histocompatibility complex, class II, DM beta [Source:HGNC Symbol;Acc:HGNC:4935]
SLC16A14	ENSCDRG00005004964	27.1641	-0.970773	0.452028	-2.1476	0.0317458	0.396605	77.5723	40.499	29.9154	19.1312	21.1712	10.899	6.55502	19.5401	22.1972	24.1608	solute carrier family 16 member 14 [Source:HGNC Symbol;Acc:HGNC:26417]
ZNF248	ENSCDRG00005007295	61.0171	0.521788	0.242967	2.14757	0.0317481	0.396605	22.1635	44.4502	48.7511	61.7664	61.4647	65.3937	87.4003	75.1999	63.7275	79.8534	zinc finger protein 248 [Source:NCBI gene;Acc:105097399]
NKD1	ENSCDRG00005000863	35.6585	-0.94671	0.440786	-2.14778	0.0317315	0.396605	94.1949	32.5968	54.291	23.504	38.2447	33.6877	4.37001	20.1323	32.2218	23.3418	NKD inhibitor of WNT signaling pathway 1 [Source:HGNC Symbol;Acc:HGNC:17045]
ENSCDRG00005022274	ENSCDRG00005022274	700.049	-0.459615	0.214046	-2.14727	0.031772	0.396605	792.346	1072.73	551.774	679.43	949.288	604.397	808.453	490.872	615.078	436.122	prostaglandin D2 synthase [Source:NCBI gene;Acc:105106194]
BHLHE40	ENSCDRG00005007592	96.9977	0.530464	0.247056	2.14714	0.0317824	0.396605	77.5723	80.0103	77.5585	89.0966	67.6112	136.732	163.876	91.1873	113.85	72.4823	basic helix-loop-helix family member e40 [Source:HGNC Symbol;Acc:HGNC:1046]
ENSCDRG00005020485	ENSCDRG00005020485	440.411	-0.786747	0.36658	-2.14618	0.0318586	0.396953	1169.13	413.88	691.379	227.388	295.713	254.639	458.851	248.693	396.686	247.75	nan
RAB25	ENSCDRG00005011364	7.14481	-1.83186	0.853451	-2.14642	0.0318395	0.396953	16.6226	16.7923	12.1878	2.73303	8.87823	0.990814	0	7.10551	5.72832	0.409505	RAB25, member RAS oncogene family [Source:NCBI gene;Acc:105105659]
CCNL1	ENSCDRG00005001866	92.4296	0.6087	0.283911	2.14398	0.0320342	0.397913	49.8679	78.0347	44.3192	92.3763	96.2947	136.732	67.7352	90.0031	134.615	134.317	cyclin L1 [Source:HGNC Symbol;Acc:HGNC:20569]
MRTO4	ENSCDRG00005007560	35.939	0.579988	0.270528	2.14391	0.0320402	0.397913	16.6226	32.5968	31.0234	26.7836	32.0982	39.6326	48.0702	34.9354	47.2586	50.3691	MRT4 homolog, ribosome maturation factor [Source:NCBI gene;Acc:105103980]
SSH2	ENSCDRG00005007848	242.15	0.614389	0.286602	2.1437	0.0320566	0.397913	121.899	268.676	185.033	161.248	211.029	537.021	262.201	209.612	259.206	205.571	slingshot protein phosphatase 2 [Source:NCBI gene;Acc:105088151]
ISM1	ENSCDRG00005006068	6.93277	-1.74548	0.813781	-2.14491	0.0319604	0.397913	27.7044	8.89003	11.0798	1.09321	7.51235	1.98163	0	2.3685	5.01228	3.68554	isthmin 1 [Source:NCBI gene;Acc:105088317]
RCAN2	ENSCDRG00005017371	236.125	-0.511968	0.238765	-2.14424	0.0320139	0.397913	282.585	275.591	199.436	290.247	342.836	105.026	174.801	258.759	199.775	232.189	regulator of calcineurin 2 [Source:NCBI gene;Acc:105101203]
OPALIN	ENSCDRG00005009332	306.352	-0.509789	0.237904	-2.14283	0.0321266	0.398481	227.176	601.559	300.262	316.484	342.153	260.584	319.011	198.954	254.91	242.427	oligodendrocytic myelin paranodal and inner loop protein [Source:NCBI gene;Acc:105084272]
NLRP9	ENSCDRG00005010148	9.4794	-1.33178	0.621627	-2.14241	0.0321608	0.39851	27.7044	3.95112	11.0798	16.3982	10.9271	1.98163	4.37001	6.51338	8.59248	3.27604	NLR family pyrin domain containing 9 [Source:HGNC Symbol;Acc:HGNC:22941]
VSTM5	ENSCDRG00005014480	44.5235	-0.698187	0.325921	-2.1422	0.0321773	0.39851	88.6541	44.4502	56.5069	45.9148	47.8059	19.8163	28.4051	50.3307	23.6293	39.7219	V-set and transmembrane domain containing 5 [Source:HGNC Symbol;Acc:HGNC:34443]
PPP1R15A	ENSCDRG00005002820	80.2029	0.460669	0.215081	2.14183	0.0322069	0.398575	72.0314	82.9736	66.4788	62.8596	54.6353	75.3019	107.065	111.32	83.7766	85.5864	protein phosphatase 1 regulatory subunit 15A [Source:NCBI gene;Acc:105102894]
PKHD1L1	ENSCDRG00005021263	142.411	-0.428197	0.19995	-2.14152	0.032232	0.398587	155.145	131.375	146.253	226.841	155.711	105.026	120.175	126.715	113.134	143.736	PKHD1 like 1 [Source:NCBI gene;Acc:105093295]
CAPN14	ENSCDRG00005013919	10.0559	-1.66134	0.776238	-2.14025	0.0323344	0.399252	38.7861	21.7312	4.43192	1.63982	12.2929	0.990814	4.37001	7.10551	4.29624	4.91405	calpain 14 [Source:HGNC Symbol;Acc:HGNC:16664]
GNA15	ENSCDRG00005007101	49.9824	0.900909	0.420921	2.14033	0.032328	0.399252	60.9497	32.5968	22.1596	32.7963	30.0494	92.1457	117.99	38.4882	47.2586	25.3893	G protein subunit alpha 15 [Source:HGNC Symbol;Acc:HGNC:4383]
WDR44	ENSCDRG00005009484	127.875	0.578693	0.27046	2.13966	0.032382	0.39954	27.7044	85.937	98.6101	143.211	140.686	128.806	152.95	154.545	163.257	183.049	WD repeat domain 44 [Source:NCBI gene;Acc:105093923]
LTBP4	ENSCDRG00005011375	187.601	-0.571405	0.267182	-2.13863	0.0324653	0.400268	282.585	208.422	227.136	165.621	235.615	97.0998	264.386	150.992	144.64	99.5096	latent transforming growth factor beta binding protein 4 [Source:HGNC Symbol;Acc:HGNC:6717]
KLHL15	ENSCDRG00005021665	112.357	0.560622	0.262295	2.13737	0.032568	0.400277	38.7861	96.8026	73.1266	118.067	114.051	192.218	115.805	123.162	104.542	147.012	kelch like family member 15 [Source:NCBI gene;Acc:105103959]
ELK1	ENSCDRG00005016075	85.8911	-0.50246	0.235131	-2.13694	0.032603	0.400277	127.44	70.1325	122.986	86.3636	98.3435	56.4764	96.1403	73.4236	69.4558	58.1496	ETS transcription factor ELK1 [Source:HGNC Symbol;Acc:HGNC:3321]
SHROOM4	ENSCDRG00005020003	144.027	0.495267	0.231677	2.13775	0.0325373	0.400277	99.7358	155.082	99.7181	98.9355	136.588	199.154	216.316	112.504	179.726	142.508	shroom family member 4 [Source:HGNC Symbol;Acc:HGNC:29215]
SYNE1	ENSCDRG00005019486	3291.57	0.311032	0.145539	2.13711	0.0325894	0.400277	2183.11	3162.88	3034.75	3267.06	3022.7	3857.24	2967.24	3309.39	3836.54	4274.82	spectrin repeat containing nuclear envelope protein 1 [Source:HGNC Symbol;Acc:HGNC:17089]
LRRFIP2	ENSCDRG00005014822	131.372	0.373803	0.174886	2.13741	0.0325646	0.400277	72.0314	114.583	124.094	135.558	114.734	158.53	122.36	150.4	165.405	156.021	LRR binding FLII interacting protein 2 [Source:HGNC Symbol;Acc:HGNC:6703]
KCNN3	ENSCDRG00005003748	108.902	-0.430252	0.201351	-2.13683	0.0326121	0.400277	127.44	90.8759	156.225	119.707	128.393	91.1549	111.435	78.1606	101.678	83.9484	potassium calcium-activated channel subfamily N member 3 [Source:HGNC Symbol;Acc:HGNC:6292]
PPP4R3A	ENSCDRG00005005210	152.358	0.336625	0.15758	2.13622	0.0326616	0.400287	144.063	115.57	126.31	138.838	152.979	185.282	139.84	168.164	179.726	172.811	protein phosphatase 4 regulatory subunit 3A [Source:HGNC Symbol;Acc:HGNC:20219]
CAMSAP1	ENSCDRG00005001959	404.019	-0.354019	0.16571	-2.13638	0.0326482	0.400287	498.679	419.807	525.182	397.382	424.789	310.125	469.777	380.737	282.836	330.88	calmodulin regulated spectrin associated protein 1 [Source:HGNC Symbol;Acc:HGNC:19946]
WDR93	ENSCDRG00005020735	23.1245	-1.01267	0.474367	-2.13478	0.0327792	0.400879	55.4088	25.6823	42.1032	12.5719	20.4882	6.9357	28.4051	15.3953	10.7406	13.5136	WD repeat domain 93 [Source:HGNC Symbol;Acc:HGNC:26924]
LMAN2	ENSCDRG00005009497	120.817	0.374599	0.175463	2.13492	0.0327675	0.400879	94.1949	131.375	89.7463	116.427	90.8311	130.787	137.655	140.334	133.899	142.917	lectin, mannose binding 2 [Source:NCBI gene;Acc:105099588]
FLYWCH1	ENSCDRG00005017868	168.076	-0.462642	0.216722	-2.13473	0.032783	0.400879	199.472	178.788	186.141	224.655	179.613	95.1181	211.946	155.729	108.838	140.46	FLYWCH-type zinc finger 1 [Source:HGNC Symbol;Acc:HGNC:25404]
ANKDD1B	ENSCDRG00005001160	20.4359	-0.827017	0.387754	-2.13284	0.0329378	0.401342	33.2453	19.7556	34.3474	30.6099	16.3906	12.8806	6.55502	15.9874	18.617	15.9707	ankyrin repeat and death domain containing 1B [Source:HGNC Symbol;Acc:HGNC:32525]
NDRG2	ENSCDRG00005001985	1600.57	0.366859	0.171996	2.13296	0.0329282	0.401342	914.245	1630.83	1390.51	1536.51	1497.69	2078.73	1415.88	1670.39	2116.61	1754.32	NDRG family member 2 [Source:HGNC Symbol;Acc:HGNC:14460]
ENSCDRG00005017414	ENSCDRG00005017414	30.1747	-0.720997	0.337918	-2.13364	0.0328719	0.401342	22.1635	54.328	48.7511	26.237	36.1959	24.7704	13.11	29.0141	22.1972	24.9798	nan
ENSCDRG00005021901	ENSCDRG00005021901	11.7492	-2.02406	0.948655	-2.13361	0.0328743	0.401342	72.0314	9.87781	7.75585	0.546605	6.82941	3.96326	2.18501	0.592125	10.0246	3.68554	nan
MMEL1	ENSCDRG00005013475	9.67525	-1.43825	0.674486	-2.13237	0.0329766	0.401342	22.1635	13.8289	17.7277	2.18642	17.0735	5.94488	0	7.69763	6.44436	3.68554	membrane metalloendopeptidase like 1 [Source:HGNC Symbol;Acc:HGNC:14668]
ENSCDRG00005020497	ENSCDRG00005020497	62.7628	0.544242	0.255251	2.13218	0.0329917	0.401342	66.4905	32.5968	60.9389	53.0207	45.757	72.3294	93.9553	79.9369	52.9869	69.6158	nan
WFIKKN1	ENSCDRG00005010497	19.1869	-0.983626	0.461246	-2.13254	0.0329626	0.401342	55.4088	22.719	15.5117	15.3049	25.2688	14.8622	4.37001	15.3953	7.87644	15.1517	WAP, follistatin/kazal, immunoglobulin, kunitz and netrin domain containing 1 [Source:HGNC Symbol;Acc:HGNC:30912]
ENSCDRG00005013899	ENSCDRG00005013899	40.6752	-0.935747	0.439053	-2.13128	0.0330657	0.401945	83.1132	36.5479	96.3942	16.3982	38.2447	18.8255	30.5901	23.0929	36.518	27.0273	nan
RNF128	ENSCDRG00005019492	51.8423	0.556957	0.261504	2.12983	0.033186	0.402023	38.7861	27.6579	49.8591	55.2071	35.5129	64.4029	72.1052	60.9889	50.8388	63.0637	ring finger protein 128 [Source:NCBI gene;Acc:105095575]
ZWINT	ENSCDRG00005011236	12.2083	-1.73287	0.813887	-2.12913	0.0332433	0.402023	72.0314	6.91447	9.97181	2.73303	6.14647	2.97244	4.37001	9.47401	5.01228	2.45703	ZW10 interacting kinetochore protein [Source:NCBI gene;Acc:105085260]
HIVEP2	ENSCDRG00005011550	239.414	-0.295712	0.138788	-2.13067	0.0331163	0.402023	310.289	268.676	238.216	247.065	265.664	210.053	216.316	199.546	192.615	245.703	HIVEP zinc finger 2 [Source:NCBI gene;Acc:105092057]
PRPH	ENSCDRG00005006126	17.5447	-1.16731	0.548215	-2.12929	0.0332304	0.402023	60.9497	17.7801	18.8356	13.6651	13.6588	2.97244	17.4801	7.69763	15.0368	7.37108	peripherin [Source:HGNC Symbol;Acc:HGNC:9461]
ABCA8	ENSCDRG00005019816	294.591	0.448087	0.210403	2.12966	0.0331995	0.402023	188.39	345.723	166.197	221.922	314.153	366.601	319.011	318.564	391.674	313.68	ATP binding cassette subfamily A member 8 [Source:HGNC Symbol;Acc:HGNC:38]
SLC6A20	ENSCDRG00005005253	49.4247	-0.811823	0.381224	-2.12952	0.0332114	0.402023	16.6226	64.2058	65.3708	71.6053	94.2458	32.6969	15.295	29.0141	63.0115	42.179	solute carrier family 6 member 20 [Source:NCBI gene;Acc:105091294]
RO60	ENSCDRG00005014398	107.447	0.536094	0.251658	2.13025	0.033151	0.402023	49.8679	110.631	55.399	106.588	105.173	116.916	126.73	116.649	171.85	114.661	Ro60, Y RNA binding protein [Source:NCBI gene;Acc:105097309]
P2RY12	ENSCDRG00005016800	77.1951	0.705667	0.331616	2.12796	0.0333401	0.40278	55.4088	58.2791	28.8075	89.0966	60.7817	135.742	52.4402	89.4109	127.455	74.5298	purinergic receptor P2Y12 [Source:HGNC Symbol;Acc:HGNC:18124]
XIRP2	ENSCDRG00005006018	30.4944	-1.30485	0.613245	-2.12779	0.0333548	0.40278	105.277	41.4868	47.6431	8.19908	17.0735	5.94488	30.5901	24.2771	17.901	6.55207	xin actin binding repeat containing 2 [Source:NCBI gene;Acc:105091054]
SLC7A2	ENSCDRG00005019886	75.5201	0.415084	0.195185	2.12662	0.033452	0.403348	66.4905	56.3035	66.4788	62.8596	73.7576	83.2284	74.2902	80.5291	93.8012	97.4621	solute carrier family 7 member 2 [Source:NCBI gene;Acc:105102369]
ZNF704	ENSCDRG00005016195	49.6033	-0.617848	0.290533	-2.1266	0.0334534	0.403348	55.4088	77.0469	74.2346	48.6478	43.0253	54.4948	45.8851	31.3827	28.6416	37.2649	zinc finger protein 704 [Source:HGNC Symbol;Acc:HGNC:32291]
NF2	ENSCDRG00005015735	278.253	-0.334215	0.157179	-2.12633	0.0334754	0.403348	238.258	359.552	360.093	280.408	308.006	270.492	203.206	257.575	227.701	277.235	neurofibromin 2 [Source:HGNC Symbol;Acc:HGNC:7773]
ETS2	ENSCDRG00005007775	107.681	0.807097	0.379809	2.125	0.0335862	0.403795	16.6226	133.35	55.399	72.1519	102.441	228.878	170.431	81.7133	110.986	104.833	ETS proto-oncogene 2, transcription factor [Source:NCBI gene;Acc:105104669]
RALGPS1	ENSCDRG00005015413	310.856	-0.251681	0.11843	-2.12514	0.0335747	0.403795	371.239	333.87	331.286	326.323	338.056	253.648	270.941	292.51	280.688	309.995	Ral GEF with PH domain and SH3 binding motif 1 [Source:NCBI gene;Acc:105092615]
SEC61A1	ENSCDRG00005011502	425.741	0.364958	0.171703	2.12552	0.0335432	0.403795	232.717	305.224	444.3	423.619	433.667	529.095	456.666	502.715	445.377	484.034	SEC61 translocon alpha 1 subunit [Source:NCBI gene;Acc:105090114]
POLR3A	ENSCDRG00005022255	383.494	0.347749	0.163722	2.12402	0.0336687	0.404492	277.044	300.285	281.427	411.047	403.618	393.353	465.407	451.2	374.489	477.073	RNA polymerase III subunit A [Source:HGNC Symbol;Acc:HGNC:30074]
ENSCDRG00005003322	ENSCDRG00005003322	14.716	-1.57194	0.7402	-2.12367	0.0336977	0.404544	60.9497	9.87781	27.6995	3.82624	8.87823	1.98163	17.4801	2.96063	8.59248	4.91405	nan
SYTL5	ENSCDRG00005019261	162.044	0.559197	0.263436	2.1227	0.0337787	0.404631	144.063	109.644	84.2064	156.329	165.272	169.429	113.62	258.167	168.269	251.436	synaptotagmin like 5 [Source:HGNC Symbol;Acc:HGNC:15589]
ZMIZ2	ENSCDRG00005002816	137.241	-0.494004	0.232694	-2.12298	0.0337556	0.404631	221.635	161.996	190.572	105.495	129.076	108.99	142.025	99.4771	126.739	86.4055	zinc finger MIZ-type containing 2 [Source:HGNC Symbol;Acc:HGNC:22229]
ALPL	ENSCDRG00005011675	69.8054	0.595493	0.280485	2.12308	0.0337468	0.404631	60.9497	56.3035	52.075	50.2877	57.367	111.962	115.805	50.3307	56.5671	86.4055	alkaline phosphatase, biomineralization associated [Source:NCBI gene;Acc:105088863]
NEXMIF	ENSCDRG00005020765	110.752	-0.576921	0.272033	-2.12077	0.0339411	0.405819	83.1132	103.717	169.521	174.914	129.759	61.4305	61.1802	116.649	88.0729	119.166	neurite extension and migration factor [Source:NCBI gene;Acc:105090677]
ZNF496	ENSCDRG00005008945	77.1746	0.432144	0.203808	2.12035	0.0339766	0.405819	49.8679	79.0225	72.0186	67.779	56.0012	96.109	76.4752	85.2661	105.258	83.9484	zinc finger protein 496 [Source:NCBI gene;Acc:105104205]
CYHR1	ENSCDRG00005018044	56.2425	-0.500942	0.236253	-2.12037	0.0339752	0.405819	99.7358	68.1569	47.6431	60.6732	61.4647	50.5315	43.7001	43.2252	39.3822	47.912	cysteine and histidine rich 1 [Source:NCBI gene;Acc:105104988]
CDC34	ENSCDRG00005019265	127.825	-0.343854	0.162132	-2.12083	0.0339361	0.405819	138.522	137.302	146.253	133.372	162.54	117.907	87.4003	117.241	123.875	113.842	cell division cycle 34 [Source:HGNC Symbol;Acc:HGNC:1734]
BMP2K	ENSCDRG00005002238	199.983	0.380618	0.179541	2.11995	0.03401	0.405924	138.522	203.483	162.873	184.753	172.784	292.29	170.431	212.573	252.046	210.076	BMP2 inducible kinase [Source:HGNC Symbol;Acc:HGNC:18041]
MAPK7	ENSCDRG00005017447	146.41	-0.445499	0.2102	-2.11941	0.034056	0.406178	188.39	159.033	217.164	147.583	130.442	122.861	170.431	121.386	110.986	95.8241	mitogen-activated protein kinase 7 [Source:HGNC Symbol;Acc:HGNC:6880]
UQCC1	ENSCDRG00005015218	144.833	-0.570265	0.26926	-2.1179	0.0341838	0.407407	288.126	145.204	122.986	187.486	137.954	92.1457	65.5502	134.412	127.455	147.012	ubiquinol-cytochrome-c reductase complex assembly factor 1 [Source:NCBI gene;Acc:105084964]
ENSCDRG00005014331	ENSCDRG00005014331	59.1046	-0.702588	0.331794	-2.11754	0.0342137	0.407449	116.358	60.2546	84.2064	59.0333	47.1229	41.6142	83.0303	34.3433	34.3699	30.7128	nan
KDM1B	ENSCDRG00005017965	75.387	0.538283	0.254234	2.11727	0.0342369	0.407449	44.327	62.2302	37.6713	81.9908	73.7576	111.962	87.4003	74.0157	91.6531	88.8625	lysine demethylase 1B [Source:HGNC Symbol;Acc:HGNC:21577]
DDX39A	ENSCDRG00005015189	36.8023	0.575959	0.272075	2.11691	0.0342675	0.407518	22.1635	26.6701	33.2394	31.7031	29.3665	49.5407	52.4402	41.4488	48.6907	32.7604	DExD-box helicase 39A [Source:NCBI gene;Acc:105105967]
SYNPO2	ENSCDRG00005004165	58.1528	-1.02186	0.482853	-2.1163	0.0343193	0.407839	55.4088	97.7903	60.9389	68.3256	108.588	45.5774	0	46.7779	69.4558	28.6653	synaptopodin 2 [Source:NCBI gene;Acc:105093643]
PGF	ENSCDRG00005000818	21.0095	-0.878401	0.415276	-2.11522	0.034411	0.40857	22.1635	19.7556	35.4553	39.3556	18.4394	7.92651	17.4801	22.5008	11.4566	15.5612	placental growth factor [Source:NCBI gene;Acc:105086095]
IL9R	ENSCDRG00005007313	11.7575	-1.4169	0.669929	-2.11499	0.0344305	0.40857	44.327	6.91447	24.3755	4.91945	8.87823	6.9357	2.18501	5.32913	10.0246	3.68554	interleukin 9 receptor [Source:HGNC Symbol;Acc:HGNC:6030]
ENSCDRG00005017992	ENSCDRG00005017992	26.7384	-0.825372	0.390305	-2.11469	0.0344567	0.408587	55.4088	28.6457	42.1032	18.5846	32.7812	19.8163	8.74003	16.5795	16.4689	28.2558	nan
CSF3R	ENSCDRG00005008687	20.0337	-1.19164	0.563807	-2.11356	0.0345531	0.409434	49.8679	29.6334	40.9952	4.91945	16.3906	14.8622	10.925	8.28976	17.901	6.55207	colony stimulating factor 3 receptor [Source:HGNC Symbol;Acc:HGNC:2439]
EEF1AKNMT	ENSCDRG00005012169	43.8984	-0.675569	0.319691	-2.11319	0.0345842	0.409508	99.7358	51.3646	44.3192	40.9954	43.0253	27.7428	30.5901	44.4094	20.7651	36.0364	eEF1A lysine and N-terminal methyltransferase [Source:NCBI gene;Acc:105092765]
ENSCDRG00005008363	ENSCDRG00005008363	7.32458	-1.68355	0.797023	-2.11229	0.0346615	0.409833	33.2453	9.87781	6.64788	2.73303	5.46353	0.990814	4.37001	2.96063	5.72832	1.22851	nan
MFNG	ENSCDRG00005008348	87.1554	0.831524	0.393622	2.11249	0.0346441	0.409833	11.0818	110.631	56.5069	69.4188	55.3182	198.163	128.915	74.0157	105.258	62.2447	MFNG O-fucosylpeptide 3-beta-N-acetylglucosaminyltransferase [Source:NCBI gene;Acc:105091974]
DTX2	ENSCDRG00005008002	78.2769	0.635553	0.300975	2.11164	0.034717	0.410194	60.9497	80.9981	63.1548	42.6352	58.05	153.576	104.88	56.844	88.7889	72.8918	deltex E3 ubiquitin ligase 2 [Source:HGNC Symbol;Acc:HGNC:15973]
KLHL6	ENSCDRG00005002158	18.1907	1.15226	0.54581	2.1111	0.0347637	0.410314	0	14.8167	18.8356	13.6651	5.46353	54.4948	13.11	15.9874	27.9255	17.6087	kelch like family member 6 [Source:NCBI gene;Acc:105085899]
ENSCDRG00005001583	ENSCDRG00005001583	460.052	0.740982	0.351019	2.11095	0.034777	0.410314	393.402	555.133	248.187	280.408	247.225	1201.86	524.402	344.025	518.413	287.472	nan
ENSCDRG00005003783	ENSCDRG00005003783	23.6368	-1.29175	0.612457	-2.10913	0.0349334	0.410469	72.0314	21.7312	62.0468	6.01266	8.87823	13.8714	15.295	11.8425	16.4689	8.19009	chloride voltage-gated channel Ka [Source:NCBI gene;Acc:105107070]
ENSCDRG00005000794	ENSCDRG00005000794	62.5882	0.456067	0.216204	2.10943	0.0349076	0.410469	49.8679	66.1813	40.9952	51.9275	53.9523	84.2192	65.5502	74.0157	71.604	67.5682	nan
TNC	ENSCDRG00005013641	186.541	-0.587248	0.278302	-2.11011	0.0348488	0.410469	349.075	165.947	271.455	200.057	140.686	155.558	185.726	183.559	128.171	85.1769	tenascin C [Source:NCBI gene;Acc:105103745]
ENSCDRG00005007669	ENSCDRG00005007669	374.167	-0.358523	0.169992	-2.10905	0.0349399	0.410469	509.761	335.846	408.844	460.241	395.423	250.676	371.451	390.803	282.836	335.794	ADP ribosylation factor 3 [Source:NCBI gene;Acc:105103786]
KAT14	ENSCDRG00005004093	222.153	-0.289493	0.137243	-2.10934	0.034915	0.410469	243.799	212.373	269.239	257.998	238.346	192.218	205.391	212.573	178.294	211.304	lysine acetyltransferase 14 [Source:HGNC Symbol;Acc:HGNC:15904]
CLCN7	ENSCDRG00005010187	272.501	-0.315274	0.149486	-2.10905	0.0349399	0.410469	277.044	304.237	353.445	317.031	255.42	289.318	229.426	253.43	226.985	218.675	chloride voltage-gated channel 7 [Source:HGNC Symbol;Acc:HGNC:2025]
PGM3	ENSCDRG00005005863	77.7838	0.483281	0.229248	2.10811	0.0350213	0.41063	44.327	60.2546	70.9107	74.8849	70.3429	77.2835	63.3652	101.253	98.0974	117.118	phosphoglucomutase 3 [Source:NCBI gene;Acc:105089253]
TRIM56	ENSCDRG00005014926	56.1177	0.696744	0.330565	2.10774	0.0350535	0.41063	33.2453	59.2669	39.8873	31.1565	46.44	114.934	85.2153	55.6598	51.5549	43.817	tripartite motif containing 56 [Source:HGNC Symbol;Acc:HGNC:19028]
BANP	ENSCDRG00005020643	40.6311	0.588398	0.279147	2.10784	0.0350449	0.41063	38.7861	27.6579	29.9154	26.7836	39.6106	58.458	58.9952	46.1858	45.1105	34.8079	BTG3 associated nuclear protein [Source:HGNC Symbol;Acc:HGNC:13450]
ENSCDRG00005006955	ENSCDRG00005006955	12.6469	-1.25174	0.593787	-2.10807	0.035025	0.41063	22.1635	14.8167	38.7793	8.19908	7.51235	6.9357	2.18501	5.92125	9.30851	10.6471	nan
NREP	ENSCDRG00005006335	47.3478	-0.570002	0.270485	-2.10733	0.035089	0.410754	33.2453	45.4379	66.4788	79.8043	53.9523	42.605	30.5901	36.1197	42.2463	42.998	neuronal regeneration related protein [Source:NCBI gene;Acc:105095378]
GREB1	ENSCDRG00005003633	21.8026	-1.23569	0.586659	-2.10633	0.0351761	0.41148	66.4905	24.6945	31.0234	5.46605	26.6347	5.94488	26.2201	10.0661	15.7529	5.73306	growth regulating estrogen receptor binding 1 [Source:HGNC Symbol;Acc:HGNC:24885]
DDX3X	ENSCDRG00005020330	699.315	0.558564	0.265221	2.10603	0.0352013	0.411483	382.321	488.952	454.271	809.522	684.307	1047.29	528.772	705.814	623.67	1268.24	DEAD-box helicase 3 X-linked [Source:HGNC Symbol;Acc:HGNC:2745]
RAD51D	ENSCDRG00005008720	133.168	-0.42854	0.203514	-2.1057	0.0352304	0.41153	138.522	131.375	158.441	173.82	164.589	93.1365	80.8453	137.965	108.838	144.146	RAD51 paralog D [Source:HGNC Symbol;Acc:HGNC:9823]
TMEM87A	ENSCDRG00005017809	199.448	0.5013	0.238446	2.10236	0.0355216	0.412435	105.277	172.862	105.258	235.04	196.687	215.007	183.541	229.745	282.836	268.225	transmembrane protein 87A [Source:NCBI gene;Acc:105101742]
AQR	ENSCDRG00005001774	348.524	0.428487	0.203826	2.10223	0.0355336	0.412435	166.226	275.591	289.183	385.903	351.032	323.005	362.711	457.713	384.513	489.358	aquarius intron-binding spliceosomal factor [Source:NCBI gene;Acc:105089986]
ENSCDRG00005002759	ENSCDRG00005002759	8.26718	-2.57998	1.22636	-2.10378	0.0353978	0.412435	38.7861	12.8412	19.9436	0	0	0	2.18501	2.3685	5.72832	0.819009	nan
PRPF39	ENSCDRG00005019715	59.8647	0.488664	0.232443	2.10229	0.0355274	0.412435	22.1635	59.2669	54.291	60.6732	43.0253	79.2651	67.7352	66.9102	68.7398	76.5773	pre-mRNA processing factor 39 [Source:NCBI gene;Acc:105086456]
ZNF606	ENSCDRG00005009573	79.3995	0.465985	0.221655	2.1023	0.0355272	0.412435	38.7861	78.0347	74.2346	73.2451	60.0988	110.971	93.9553	76.9763	78.7644	108.928	zinc finger protein 606 [Source:HGNC Symbol;Acc:HGNC:25879]
NPDC1	ENSCDRG00005022267	368.512	0.447805	0.212894	2.10342	0.0354289	0.412435	415.566	259.786	371.173	274.942	248.59	388.399	561.547	476.661	278.539	409.914	neural proliferation, differentiation and control 1 [Source:HGNC Symbol;Acc:HGNC:7899]
HDAC7	ENSCDRG00005012006	183.974	0.43973	0.209151	2.10245	0.0355139	0.412435	138.522	187.678	163.981	112.601	171.418	261.575	266.571	170.532	191.183	175.677	histone deacetylase 7 [Source:HGNC Symbol;Acc:HGNC:14067]
ASCL1	ENSCDRG00005009930	9.11982	1.24682	0.593014	2.10251	0.0355088	0.412435	0	3.95112	6.64788	7.65247	4.78059	11.8898	28.4051	10.0661	10.0246	7.78059	achaete-scute family bHLH transcription factor 1 [Source:HGNC Symbol;Acc:HGNC:738]
ENSCDRG00005009510	ENSCDRG00005009510	5.81191	1.6879	0.802348	2.1037	0.0354045	0.412435	0	2.96334	3.32394	0	6.14647	11.8898	8.74003	5.92125	12.1727	6.96158	nan
C1orf53	ENSCDRG00005012464	24.912	0.818728	0.389597	2.10147	0.0355994	0.412617	16.6226	6.91447	21.0516	20.771	22.5371	38.6417	41.5151	24.2771	35.0859	21.7037	chromosome 1 open reading frame 53 [Source:HGNC Symbol;Acc:HGNC:30003]
F12	ENSCDRG00005009012	8.82083	2.15615	1.0259	2.10171	0.035579	0.412617	0	3.95112	5.5399	2.73303	2.04882	1.98163	56.8102	8.28976	6.44436	0.409505	coagulation factor XII [Source:NCBI gene;Acc:105099592]
PSME1	ENSCDRG00005015693	95.744	-0.478271	0.227724	-2.10022	0.0357094	0.412821	138.522	84.9492	86.4224	133.372	118.832	93.1365	65.5502	64.5417	98.8135	73.3013	proteasome activator subunit 1 [Source:NCBI gene;Acc:105102413]
SPHKAP	ENSCDRG00005004618	82.259	0.79119	0.376734	2.10013	0.0357174	0.412821	66.4905	53.3402	81.9905	36.6225	65.5623	103.045	87.4003	179.414	33.6539	115.071	SPHK1 interactor, AKAP domain containing [Source:HGNC Symbol;Acc:HGNC:30619]
BRINP2	ENSCDRG00005007578	99.9807	-0.426841	0.203169	-2.10092	0.0356482	0.412821	72.0314	107.668	117.446	145.397	117.466	86.2008	109.25	89.4109	73.036	81.9009	BMP/retinoic acid inducible neural specific 2 [Source:NCBI gene;Acc:105099968]
RASGEF1C	ENSCDRG00005005101	38.4769	-0.576392	0.274442	-2.10023	0.0357083	0.412821	55.4088	50.3768	50.967	34.4361	41.6594	40.6234	28.4051	24.8693	29.3576	28.6653	RasGEF domain family member 1C [Source:HGNC Symbol;Acc:HGNC:27400]
GOLPH3	ENSCDRG00005002236	146.075	0.469859	0.223884	2.09867	0.035846	0.413636	55.4088	123.473	115.23	173.82	129.076	186.273	139.84	206.06	160.393	171.173	golgi phosphoprotein 3 [Source:HGNC Symbol;Acc:HGNC:15452]
GRM8	ENSCDRG00005005517	47.9789	0.558264	0.266151	2.09754	0.0359454	0.413636	16.6226	38.5235	48.7511	40.4488	41.6594	43.5958	67.7352	66.9102	47.9747	67.5682	glutamate metabotropic receptor 8 [Source:HGNC Symbol;Acc:HGNC:4600]
SLITRK1	ENSCDRG00005012480	56.93	-0.512342	0.244263	-2.0975	0.0359492	0.413636	60.9497	70.1325	49.8591	89.0966	63.5135	42.605	41.5151	45.0015	58.7152	47.912	SLIT and NTRK like family member 1 [Source:NCBI gene;Acc:105092506]
GRIN1	ENSCDRG00005022254	564.79	-0.465172	0.221792	-2.09733	0.0359639	0.413636	714.773	534.39	725.726	675.057	626.257	273.465	609.617	568.44	344.415	575.763	glutamate ionotropic receptor NMDA type subunit 1 [Source:NCBI gene;Acc:105106183]
EPN2	ENSCDRG00005017549	157.814	-0.377538	0.179956	-2.09795	0.0359098	0.413636	221.635	167.923	211.624	132.278	166.638	151.595	142.025	131.452	126.023	126.946	epsin 2 [Source:HGNC Symbol;Acc:HGNC:18639]
CAMK1D	ENSCDRG00005019403	49.9651	-0.648793	0.309212	-2.09821	0.0358864	0.413636	55.4088	33.5846	91.9623	49.1945	75.1235	31.706	34.9601	41.4488	49.4067	36.8554	calcium/calmodulin dependent protein kinase ID [Source:NCBI gene;Acc:105100308]
ENSCDRG00005008804	ENSCDRG00005008804	14.5114	-1.98213	0.944445	-2.09872	0.0358414	0.413636	77.5723	13.8289	21.0516	1.09321	2.04882	1.98163	19.6651	2.96063	2.86416	2.04752	nan
GNB4	ENSCDRG00005000360	106.429	0.591347	0.282125	2.09605	0.0360779	0.414367	49.8679	90.8759	58.7229	114.787	103.807	150.604	63.3652	132.636	157.529	142.098	G protein subunit beta 4 [Source:NCBI gene;Acc:105085924]
ENSCDRG00005008482	ENSCDRG00005008482	12.2106	-1.68589	0.804249	-2.09623	0.0360615	0.414367	44.327	26.6701	14.4037	2.18642	8.19529	6.9357	0	4.14488	13.6048	1.63802	aldehyde oxidase 2 [Source:NCBI gene;Acc:105099170]
GPR149	ENSCDRG00005000230	81.807	-0.703646	0.335905	-2.09478	0.0361907	0.414505	99.7358	62.2302	90.8543	154.689	94.9288	26.752	107.065	56.2519	63.7275	61.8352	G protein-coupled receptor 149 [Source:HGNC Symbol;Acc:HGNC:23627]
RANBP3L	ENSCDRG00005000572	23.1949	-1.03126	0.492211	-2.09516	0.0361572	0.414505	44.327	24.6945	18.8356	23.504	47.8059	28.7336	0	15.3953	14.3208	14.3327	RAN binding protein 3 like [Source:NCBI gene;Acc:105086994]
STOM	ENSCDRG00005010606	91.6643	0.490141	0.233949	2.09508	0.0361643	0.414505	83.1132	78.0347	64.2628	89.6432	68.977	144.659	74.2902	85.2661	128.887	99.5096	stomatin [Source:NCBI gene;Acc:105104427]
IVNS1ABP	ENSCDRG00005015575	235.188	0.62439	0.298055	2.09488	0.0361816	0.414505	72.0314	184.715	146.253	242.693	267.03	355.702	187.911	236.85	240.589	418.104	influenza virus NS1A binding protein [Source:NCBI gene;Acc:105099282]
ENSCDRG00005008183	ENSCDRG00005008183	12.553	-1.45149	0.693674	-2.09247	0.0363967	0.415738	38.7861	17.7801	18.8356	5.46605	14.3418	4.95407	0	2.96063	17.901	4.50455	nan
PDIA3	ENSCDRG00005012333	429.619	0.485688	0.232222	2.09148	0.0364852	0.415738	227.176	340.784	337.934	447.123	427.521	471.627	281.866	564.888	521.993	675.273	protein disulfide isomerase family A member 3 [Source:NCBI gene;Acc:105101715]
MOK	ENSCDRG00005005668	42.3184	0.717179	0.342852	2.0918	0.0364561	0.415738	16.6226	34.5723	23.2676	24.5972	56.0012	78.2743	39.3301	50.3307	46.5426	53.6451	MOK protein kinase [Source:HGNC Symbol;Acc:HGNC:9833]
NFE2L2	ENSCDRG00005002588	162.793	0.532337	0.254531	2.09145	0.0364881	0.415738	144.063	137.302	79.7745	148.13	157.759	285.354	144.21	137.373	219.108	174.858	nuclear factor, erythroid 2 like 2 [Source:NCBI gene;Acc:105098504]
SKAP2	ENSCDRG00005000915	45.915	0.681627	0.325874	2.09169	0.0364664	0.415738	22.1635	49.3891	26.5915	34.4361	38.9276	87.1916	50.2552	50.3307	65.8756	33.9889	src kinase associated phosphoprotein 2 [Source:NCBI gene;Acc:105102133]
FKBP1B	ENSCDRG00005008005	56.1344	-0.623402	0.297856	-2.09296	0.0363527	0.415738	105.277	42.4746	76.4506	65.5926	58.7329	32.6969	39.3301	56.2519	30.0737	54.4641	FKBP prolyl isomerase 1B [Source:NCBI gene;Acc:105100021]
ENSCDRG00005021235	ENSCDRG00005021235	64.496	-0.615204	0.294134	-2.09158	0.0364762	0.415738	83.1132	100.754	100.826	44.275	64.1964	66.3845	37.1451	55.6598	53.703	38.9029	tenascin XB [Source:HGNC Symbol;Acc:HGNC:11976]
SUV39H2	ENSCDRG00005020162	12.487	0.955193	0.456745	2.09131	0.0365006	0.415738	11.0818	7.90225	8.86383	8.74568	6.82941	22.7887	17.4801	18.3559	9.30851	13.5136	suppressor of variegation 3-9 homolog 2 [Source:NCBI gene;Acc:105104521]
BCL6	ENSCDRG00005007418	117.621	0.582804	0.27873	2.09093	0.0365346	0.415837	94.1949	105.693	126.31	83.6306	61.4647	229.869	137.655	97.1086	114.566	125.718	BCL6 transcription repressor [Source:HGNC Symbol;Acc:HGNC:1001]
TPM2	ENSCDRG00005005304	97.1912	-0.681584	0.326338	-2.08858	0.0367454	0.417947	72.0314	123.473	126.31	91.283	183.711	51.5223	45.8851	72.2393	137.48	67.9777	tropomyosin 2 [Source:NCBI gene;Acc:105102294]
ENSCDRG00005002517	ENSCDRG00005002517	256.164	-0.393039	0.188241	-2.08795	0.036802	0.418301	332.453	198.544	271.455	373.331	280.689	209.062	240.351	257.575	198.343	199.838	nan
ENSCDRG00005009754	ENSCDRG00005009754	6.34938	-4.52894	2.17155	-2.08558	0.037017	0.420455	55.4088	1.97556	0	0.546605	3.4147	0	0	0	2.14812	0	olfactory receptor 6C2-like [Source:NCBI gene;Acc:105100972]
CRYM	ENSCDRG00005019842	11.626	-1.54821	0.742579	-2.08491	0.0370775	0.420851	55.4088	8.89003	5.5399	8.19908	12.9759	5.94488	0	6.51338	10.7406	2.04752	crystallin mu [Source:HGNC Symbol;Acc:HGNC:2418]
CP	ENSCDRG00005014857	139.317	0.486612	0.23347	2.08426	0.0371364	0.421053	60.9497	160.021	88.6383	132.278	127.027	203.117	117.99	158.69	173.282	171.173	ceruloplasmin [Source:NCBI gene;Acc:105089504]
ENSCDRG00005020098	ENSCDRG00005020098	26.4732	-0.797513	0.383052	-2.082	0.0373426	0.421053	38.7861	29.6334	28.8075	37.1691	34.83	9.90814	21.8501	30.7905	10.0246	22.9323	diphosphoinositol polyphosphate phosphohydrolase 3-beta [Source:NCBI gene;Acc:105104372]
MEF2C	ENSCDRG00005014686	166.036	0.489711	0.235146	2.08258	0.0372891	0.421053	132.981	151.131	101.934	182.019	120.198	298.235	166.061	171.124	170.417	166.259	myocyte enhancer factor 2C [Source:NCBI gene;Acc:105099639]
REM2	ENSCDRG00005007658	12.8781	-0.917338	0.440312	-2.08338	0.0372165	0.421053	22.1635	15.8045	21.0516	14.2117	12.9759	6.9357	6.55502	7.69763	13.6048	7.78059	RRAD and GEM like GTPase 2 [Source:HGNC Symbol;Acc:HGNC:20248]
AEBP1	ENSCDRG00005010388	191.923	-0.42021	0.201866	-2.08162	0.0373769	0.421053	182.849	221.263	212.732	232.307	242.444	133.76	183.541	113.096	221.972	175.268	AE binding protein 1 [Source:HGNC Symbol;Acc:HGNC:303]
GJA1	ENSCDRG00005001981	351.869	0.503711	0.241925	2.0821	0.0373337	0.421053	238.258	252.872	296.938	342.175	322.348	544.948	190.096	416.856	514.116	400.086	gap junction protein alpha 1 [Source:NCBI gene;Acc:105088356]
TMEM19	ENSCDRG00005017823	157.66	0.629265	0.301993	2.08371	0.0371869	0.421053	38.7861	93.8392	113.014	195.685	163.906	250.676	137.655	187.704	169.701	225.637	transmembrane protein 19 [Source:NCBI gene;Acc:105095997]
TBX4	ENSCDRG00005005700	8.7176	-1.91891	0.921743	-2.08182	0.0373588	0.421053	22.1635	16.7923	27.6995	1.09321	2.04882	1.98163	2.18501	2.3685	10.0246	0.819009	T-box transcription factor 4 [Source:HGNC Symbol;Acc:HGNC:11603]
SLC2A10	ENSCDRG00005010251	11.1014	-1.54592	0.742253	-2.08274	0.0372752	0.421053	38.7861	11.8534	26.5915	2.73303	6.14647	6.9357	0	9.47401	3.5802	4.91405	solute carrier family 2 member 10 [Source:HGNC Symbol;Acc:HGNC:13444]
BMP7	ENSCDRG00005017580	34.2911	-0.595376	0.285883	-2.08258	0.0372891	0.421053	44.327	50.3768	28.8075	43.1818	37.5618	23.7795	39.3301	24.2771	25.0614	26.2083	bone morphogenetic protein 7 [Source:HGNC Symbol;Acc:HGNC:1074]
SLCO4A1	ENSCDRG00005006674	9.23443	1.44686	0.694227	2.08413	0.0371482	0.421053	5.54088	5.92669	11.0798	1.09321	2.04882	17.8347	17.4801	15.9874	4.29624	11.0566	solute carrier organic anion transporter family member 4A1 [Source:HGNC Symbol;Acc:HGNC:10953]
ENSCDRG00005009723	ENSCDRG00005009723	8.35963	-1.86314	0.895246	-2.08115	0.0374203	0.421254	38.7861	14.8167	8.86383	1.63982	2.73176	0	6.55502	3.55275	5.01228	1.63802	olfactory receptor 6C2-like [Source:NCBI gene;Acc:105100970]
LMO7	ENSCDRG00005004621	26.8056	-0.950077	0.456578	-2.08087	0.0374461	0.421256	66.4905	37.5357	39.8873	18.5846	16.3906	12.8806	30.5901	17.7638	19.3331	8.59959	LIM domain 7 [Source:HGNC Symbol;Acc:HGNC:6646]
SCN2A	ENSCDRG00005005280	361.198	-0.418225	0.201039	-2.08032	0.037496	0.421529	360.157	332.882	391.117	578.855	398.837	216.988	312.456	360.604	287.848	372.24	sodium voltage-gated channel alpha subunit 2 [Source:NCBI gene;Acc:105091047]
ENSCDRG00005010408	ENSCDRG00005010408	17.1437	-1.4096	0.677766	-2.07977	0.0375463	0.421591	77.5723	21.7312	9.97181	9.29229	12.2929	4.95407	0	13.6189	9.30851	12.6946	nan
HDHD3	ENSCDRG00005016424	9.7145	-1.17836	0.566751	-2.07914	0.037604	0.421591	11.0818	9.87781	24.3755	5.46605	17.0735	5.94488	4.37001	7.69763	4.29624	6.96158	haloacid dehalogenase like hydrolase domain containing 3 [Source:HGNC Symbol;Acc:HGNC:28171]
PGLYRP3	ENSCDRG00005016394	6.11053	-2.61403	1.25706	-2.07947	0.0375739	0.421591	44.327	4.93891	2.21596	0	2.73176	0	0	1.77638	4.29624	0.819009	peptidoglycan recognition protein 3 [Source:HGNC Symbol;Acc:HGNC:30014]
TNR	ENSCDRG00005005660	534.014	-0.350463	0.168556	-2.07921	0.0375976	0.421591	598.415	627.241	626.008	588.147	547.719	405.243	611.802	522.255	327.23	486.082	tenascin R [Source:HGNC Symbol;Acc:HGNC:11953]
SARS1	ENSCDRG00005002779	486.674	0.44013	0.211811	2.07794	0.037715	0.421685	354.616	333.87	403.304	560.817	409.765	486.49	380.191	717.064	501.944	718.68	seryl-tRNA synthetase 1 [Source:NCBI gene;Acc:105085634]
TGFB1I1	ENSCDRG00005014951	30.635	0.76291	0.367087	2.07828	0.0376832	0.421685	11.0818	26.6701	19.9436	16.3982	34.147	33.6877	50.2552	36.7118	53.703	23.7513	transforming growth factor beta 1 induced transcript 1 [Source:NCBI gene;Acc:105089716]
RTN4R	ENSCDRG00005017692	22.9057	-1.09972	0.529216	-2.07802	0.0377078	0.421685	16.6226	21.7312	56.5069	25.6904	31.4153	3.96326	34.9601	19.5401	7.1604	11.4661	reticulon 4 receptor [Source:HGNC Symbol;Acc:HGNC:18601]
RESF1	ENSCDRG00005014314	139.352	0.551715	0.265506	2.07798	0.0377115	0.421685	44.327	133.35	90.8543	145.397	138.637	204.108	104.88	148.623	190.467	192.877	retroelement silencing factor 1 [Source:HGNC Symbol;Acc:HGNC:25559]
MTRR	ENSCDRG00005004184	96.2327	0.405174	0.195072	2.07705	0.0377974	0.42217	60.9497	108.656	88.6383	75.4315	73.7576	115.925	117.99	98.2928	103.11	119.575	5-methyltetrahydrofolate-homocysteine methyltransferase reductase [Source:HGNC Symbol;Acc:HGNC:7473]
CARMIL3	ENSCDRG00005015040	114.627	-0.473597	0.22806	-2.07663	0.0378354	0.42217	171.767	118.534	137.389	132.278	106.539	84.2192	146.395	100.661	75.1842	73.3013	capping protein regulator and myosin 1 linker 3 [Source:HGNC Symbol;Acc:HGNC:20272]
NFIL3	ENSCDRG00005017210	22.4979	0.679937	0.327404	2.07675	0.0378245	0.42217	11.0818	19.7556	19.9436	15.8515	16.3906	31.706	34.9601	28.422	24.3453	22.5227	nuclear factor, interleukin 3 regulated [Source:NCBI gene;Acc:105093600]
PELI1	ENSCDRG00005006069	97.0867	0.571469	0.275268	2.07605	0.0378896	0.422488	38.7861	92.8514	56.5069	115.88	77.1723	152.585	80.8453	99.4771	119.579	137.184	pellino E3 ubiquitin protein ligase 1 [Source:NCBI gene;Acc:105104609]
RGS10	ENSCDRG00005016243	62.4557	0.771531	0.371875	2.07471	0.0380137	0.423585	55.4088	59.2669	23.2676	55.2071	38.9276	148.622	65.5502	53.8834	80.1964	44.2265	regulator of G protein signaling 10 [Source:NCBI gene;Acc:105104172]
ENSCDRG00005020368	ENSCDRG00005020368	24.3615	-1.286	0.620017	-2.07413	0.0380673	0.423608	94.1949	36.5479	14.4037	8.74568	21.1712	4.95407	30.5901	9.47401	15.7529	7.78059	nan
TELO2	ENSCDRG00005010691	119.062	-0.425238	0.204993	-2.07441	0.0380417	0.423608	99.7358	125.448	193.896	127.906	127.71	107.999	117.99	88.2267	89.505	112.204	telomere maintenance 2 [Source:HGNC Symbol;Acc:HGNC:29099]
IGDCC3	ENSCDRG00005001651	14.0282	-1.00683	0.485509	-2.07377	0.0381008	0.423695	22.1635	27.6579	15.5117	13.1185	18.4394	8.91733	0	14.211	10.0246	10.2376	immunoglobulin superfamily DCC subclass member 3 [Source:HGNC Symbol;Acc:HGNC:9700]
THEMIS	ENSCDRG00005001106	7.30738	-2.04224	0.985928	-2.07139	0.0383225	0.425298	44.327	4.93891	9.97181	1.09321	0.682941	1.98163	2.18501	2.3685	4.29624	1.22851	thymocyte selection associated [Source:NCBI gene;Acc:105096328]
LALBA	ENSCDRG00005009690	6.8474	-1.99294	0.961977	-2.07172	0.0382918	0.425298	27.7044	12.8412	8.86383	3.27963	4.09765	0	0	7.69763	3.5802	0.409505	lactalbumin alpha [Source:NCBI gene;Acc:105103818]
CBFA2T3	ENSCDRG00005020363	17.2439	-1.01601	0.490477	-2.07148	0.0383137	0.425298	49.8679	20.7434	25.4835	12.5719	10.9271	15.853	10.925	11.8425	6.44436	7.78059	CBFA2/RUNX1 partner transcriptional co-repressor 3 [Source:HGNC Symbol;Acc:HGNC:1537]
KCNH5	ENSCDRG00005000424	13.8759	-1.25907	0.607997	-2.07086	0.0383723	0.425562	27.7044	28.6457	31.0234	8.74568	4.09765	10.899	2.18501	8.88188	10.0246	6.55207	potassium voltage-gated channel subfamily H member 5 [Source:NCBI gene;Acc:105086208]
TPX2	ENSCDRG00005016079	39.2647	-0.625915	0.302316	-2.0704	0.0384146	0.425745	83.1132	42.4746	42.1032	49.7411	29.3665	28.7336	24.0351	34.3433	32.9378	25.7988	TPX2 microtubule nucleation factor [Source:NCBI gene;Acc:105100823]
RMND1	ENSCDRG00005020798	41.0026	0.583381	0.281888	2.06955	0.0384946	0.426057	22.1635	31.609	32.1314	47.008	27.3176	37.6509	45.8851	56.2519	55.135	54.8736	required for meiotic nuclear division 1 homolog [Source:NCBI gene;Acc:105100925]
NCS1	ENSCDRG00005008430	967.638	-0.309227	0.149417	-2.06956	0.0384936	0.426057	1002.9	1004.57	1136.79	1125.46	1074.27	644.029	1103.43	934.966	771.175	878.797	neuronal calcium sensor 1 [Source:NCBI gene;Acc:105092534]
ENSCDRG00005005092	ENSCDRG00005005092	524.599	-0.287615	0.139126	-2.06729	0.0387066	0.426414	548.547	491.915	705.783	581.588	546.353	449.83	570.287	449.423	463.278	438.989	nan
ENSCDRG00005017309	ENSCDRG00005017309	10.6108	-1.3259	0.641073	-2.06825	0.0386168	0.426414	16.6226	21.7312	13.2958	8.19908	16.3906	3.96326	4.37001	4.14488	15.7529	1.63802	nan
ENSCDRG00005000437	ENSCDRG00005000437	47.2107	0.658944	0.318656	2.06788	0.038651	0.426414	22.1635	43.4624	18.8356	40.4488	51.2206	67.3754	69.9202	39.6724	66.5917	52.4166	endothelial cell surface expressed chemotaxis and apoptosis regulator [Source:NCBI gene;Acc:105098119]
ENSCDRG00005000082	ENSCDRG00005000082	36.7342	0.652858	0.315761	2.06757	0.0386804	0.426414	33.2453	28.6457	32.1314	20.2244	30.0494	66.3845	45.8851	29.0141	43.6784	38.0839	nan
ENSCDRG00005012501	ENSCDRG00005012501	17.3477	-3.02441	1.46324	-2.06693	0.0387409	0.426414	116.358	19.7556	0	7.10587	12.2929	5.94488	0	7.10551	0	4.91405	olfactory receptor 478 [Source:NCBI gene;Acc:105094006]
NYAP1	ENSCDRG00005016701	245.745	-0.320321	0.154917	-2.0677	0.0386684	0.426414	304.748	246.945	321.314	264.01	230.834	216.988	249.091	235.666	184.738	203.114	neuronal tyrosine phosphorylated phosphoinositide-3-kinase adaptor 1 [Source:HGNC Symbol;Acc:HGNC:22009]
CCDC68	ENSCDRG00005021671	11.5722	1.01162	0.489547	2.06645	0.0387861	0.426414	0	11.8534	13.2958	6.55926	4.09765	14.8622	15.295	15.9874	15.7529	18.0182	coiled-coil domain containing 68 [Source:NCBI gene;Acc:105103592]
FOXN4	ENSCDRG00005010498	36.675	-0.924548	0.447381	-2.06658	0.038774	0.426414	94.1949	39.5112	66.4788	17.4914	28.6835	28.7336	17.4801	19.5401	38.6661	15.9707	forkhead box N4 [Source:HGNC Symbol;Acc:HGNC:21399]
APTX	ENSCDRG00005006333	43.6528	-0.58028	0.280762	-2.06681	0.0387522	0.426414	60.9497	67.1691	42.1032	53.5673	42.3423	41.6142	21.8501	30.7905	31.5057	44.636	aprataxin [Source:NCBI gene;Acc:105085570]
ENSCDRG00005013426	ENSCDRG00005013426	172.639	-0.449938	0.217554	-2.06817	0.0386244	0.426414	288.126	175.825	186.141	212.083	144.783	112.953	172.616	175.861	110.986	147.012	synaptogyrin 3 [Source:NCBI gene;Acc:105099720]
ENSCDRG00005007682	ENSCDRG00005007682	24.31	-0.842192	0.407693	-2.06575	0.0388519	0.426852	49.8679	32.5968	33.2394	19.1312	26.6347	19.8163	8.74003	26.0535	8.59248	18.4277	nan
PMFBP1	ENSCDRG00005006713	22.5469	-0.896027	0.433831	-2.06538	0.0388871	0.426953	38.7861	19.7556	36.5633	18.038	32.0982	6.9357	32.7751	11.2504	15.7529	13.5136	polyamine modulated factor 1 binding protein 1 [Source:NCBI gene;Acc:105088389]
ZNF470	ENSCDRG00005011493	84.877	-0.446917	0.216454	-2.06472	0.0389492	0.42735	121.899	78.0347	119.662	94.5627	83.3188	66.3845	56.8102	74.6078	88.7889	64.7017	zinc finger protein 470 [Source:NCBI gene;Acc:105098768]
ENSCDRG00005017160	ENSCDRG00005017160	40.4164	-0.870128	0.42156	-2.06407	0.0390115	0.427748	33.2453	30.6212	59.8309	72.6985	58.7329	8.91733	61.1802	26.6456	26.4935	25.7988	nan
SDCBP2	ENSCDRG00005013162	9.38886	-1.11796	0.541827	-2.06332	0.039082	0.428235	22.1635	9.87781	16.6197	7.10587	10.2441	3.96326	6.55502	6.51338	7.1604	3.68554	syndecan binding protein 2 [Source:NCBI gene;Acc:105104305]
TEC	ENSCDRG00005003076	15.3803	-0.988539	0.479888	-2.05994	0.0394046	0.428694	22.1635	17.7801	35.4553	12.0253	16.3906	7.92651	6.55502	8.28976	18.617	8.59959	tec protein tyrosine kinase [Source:NCBI gene;Acc:105099938]
IRF2BPL	ENSCDRG00005001775	178.479	0.436904	0.212097	2.05993	0.0394054	0.428694	155.145	136.314	179.493	135.011	148.198	243.74	292.791	173.493	162.541	158.069	interferon regulatory factor 2 binding protein like [Source:HGNC Symbol;Acc:HGNC:14282]
MAP3K19	ENSCDRG00005016388	24.8707	-1.34051	0.650209	-2.06166	0.0392403	0.428694	88.6541	24.6945	54.291	6.01266	7.51235	9.90814	19.6651	13.6189	18.617	5.73306	mitogen-activated protein kinase kinase kinase 19 [Source:NCBI gene;Acc:105092383]
ANK3	ENSCDRG00005012664	1789.42	-0.365487	0.177377	-2.06051	0.0393498	0.428694	1335.35	2295.6	1765.01	2394.68	2270.78	1419.84	1265.12	1767.49	1544.5	1835.81	ankyrin 3 [Source:HGNC Symbol;Acc:HGNC:494]
HIPK4	ENSCDRG00005010731	28.5703	-0.844896	0.410242	-2.0595	0.039446	0.428694	66.4905	16.7923	45.4271	29.5167	30.0494	7.92651	24.0351	20.1323	23.6293	21.7037	homeodomain interacting protein kinase 4 [Source:HGNC Symbol;Acc:HGNC:19007]
GATD1	ENSCDRG00005008754	111.641	-0.370662	0.179867	-2.06076	0.0393259	0.428694	99.7358	122.485	152.901	113.694	134.539	113.944	100.51	92.9637	84.4927	101.148	glutamine amidotransferase like class 1 domain containing 1 [Source:HGNC Symbol;Acc:HGNC:26616]
ENSCDRG00005015554	ENSCDRG00005015554	233.263	-0.330764	0.160627	-2.05921	0.0394746	0.428694	243.799	216.324	252.619	289.154	292.299	197.172	227.241	219.086	163.973	230.961	Bardet-Biedl syndrome 1 [Source:NCBI gene;Acc:105104456]
FIBIN	ENSCDRG00005007071	63.9826	0.455572	0.221267	2.05893	0.039501	0.428694	38.7861	62.2302	59.8309	60.1266	43.0253	61.4305	85.2153	70.4629	80.9125	77.8059	fin bud initiation factor homolog [Source:NCBI gene;Acc:105106393]
PPM1H	ENSCDRG00005003853	225.463	0.277088	0.13451	2.05998	0.0394003	0.428694	177.308	223.239	220.488	195.685	191.906	242.749	288.421	237.442	237.009	240.379	protein phosphatase, Mg2+/Mn2+ dependent 1H [Source:HGNC Symbol;Acc:HGNC:18583]
SAP30BP	ENSCDRG00005005647	158.503	-0.410552	0.19929	-2.06008	0.0393914	0.428694	193.931	137.302	232.676	177.1	165.272	106.017	150.765	167.572	133.183	121.213	SAP30 binding protein [Source:HGNC Symbol;Acc:HGNC:30785]
ASIC2	ENSCDRG00005018676	115.868	-0.569666	0.276673	-2.05899	0.0394957	0.428694	132.981	83.9614	126.31	165.621	180.979	62.4213	115.805	123.162	63.0115	104.424	acid sensing ion channel subunit 2 [Source:HGNC Symbol;Acc:HGNC:99]
NOTCH4	ENSCDRG00005021381	165.673	0.54366	0.263976	2.05951	0.0394457	0.428694	116.358	151.131	167.305	106.041	127.027	251.667	288.421	106.583	174.714	167.487	notch receptor 4 [Source:HGNC Symbol;Acc:HGNC:7884]
ENSCDRG00005014353	ENSCDRG00005014353	233.172	-0.433485	0.210325	-2.06102	0.0393007	0.428694	260.421	225.214	240.431	344.361	273.176	145.65	142.025	253.43	206.219	240.789	nan
LRRC74B	ENSCDRG00005010834	32.3503	-0.675275	0.327653	-2.06095	0.039308	0.428694	27.7044	43.4624	53.183	32.7963	36.8788	24.7704	39.3301	14.211	25.7774	25.3893	leucine rich repeat containing 74B [Source:HGNC Symbol;Acc:HGNC:34301]
GNAZ	ENSCDRG00005022074	240.356	-0.40364	0.196057	-2.05879	0.0395148	0.428694	337.994	245.958	279.211	262.917	247.908	149.613	262.201	253.43	154.665	209.666	G protein subunit alpha z [Source:NCBI gene;Acc:105095185]
LIPC	ENSCDRG00005012154	6.14747	-1.41704	0.688454	-2.05829	0.0395626	0.428929	0	6.91447	17.7277	9.29229	10.9271	2.97244	0	4.737	3.5802	5.32356	lipase C, hepatic type [Source:NCBI gene;Acc:105088966]
PDP1	ENSCDRG00005021075	53.513	0.609708	0.296372	2.05724	0.0396634	0.429457	22.1635	51.3646	25.4835	47.008	59.4159	51.5223	58.9952	81.1212	59.4313	78.6249	pyruvate dehyrogenase phosphatase catalytic subunit 1 [Source:HGNC Symbol;Acc:HGNC:9279]
BCR	ENSCDRG00005022061	282.442	0.367309	0.17854	2.05729	0.0396588	0.429457	265.962	264.725	252.619	204.43	243.81	278.419	452.296	318.564	277.823	265.768	BCR activator of RhoGEF and GTPase [Source:NCBI gene;Acc:105095188]
BTK	ENSCDRG00005013150	33.7516	0.894225	0.43489	2.05621	0.0397626	0.430247	16.6226	32.5968	22.1596	20.771	23.22	83.2284	43.7001	17.7638	53.703	23.7513	Bruton tyrosine kinase [Source:NCBI gene;Acc:105085487]
AMD1	ENSCDRG00005004169	138.096	0.395799	0.192541	2.05566	0.0398153	0.430534	88.6541	158.045	97.5022	121.893	122.929	193.209	133.285	154.545	147.504	163.392	adenosylmethionine decarboxylase 1 [Source:HGNC Symbol;Acc:HGNC:457]
ENSCDRG00005017587	ENSCDRG00005017587	7.80884	1.74937	0.851369	2.05477	0.0399012	0.431179	0	2.96334	7.75585	2.18642	2.73176	7.92651	39.3301	4.14488	8.59248	2.45703	nan
PRSS56	ENSCDRG00005007613	9.9162	-1.44458	0.70326	-2.05411	0.0399646	0.431315	38.7861	11.8534	11.0798	3.27963	8.87823	2.97244	10.925	4.737	5.01228	1.63802	serine protease 56 [Source:HGNC Symbol;Acc:HGNC:39433]
RBFOX2	ENSCDRG00005020273	283.102	-0.418078	0.203534	-2.0541	0.0399662	0.431315	382.321	240.031	304.694	382.077	318.25	181.319	225.056	292.51	194.763	309.995	RNA binding fox-1 homolog 2 [Source:HGNC Symbol;Acc:HGNC:9906]
ENSCDRG00005021143	ENSCDRG00005021143	204.959	-0.306174	0.149095	-2.05355	0.0400197	0.431326	265.962	201.507	216.056	217.002	245.176	207.08	142.025	184.743	183.306	186.734	nan
PLCZ1	ENSCDRG00005016663	5.69867	-1.91964	0.934793	-2.05355	0.0400193	0.431326	22.1635	5.92669	6.64788	0	11.61	0.990814	2.18501	2.96063	2.86416	1.63802	phospholipase C zeta 1 [Source:HGNC Symbol;Acc:HGNC:19218]
ZBTB1	ENSCDRG00005001236	78.5708	0.420045	0.204682	2.05218	0.0401521	0.432015	49.8679	57.2913	63.1548	71.0587	85.3676	93.1365	107.065	84.0818	86.6408	88.0435	zinc finger and BTB domain containing 1 [Source:HGNC Symbol;Acc:HGNC:20259]
ENSCDRG00005021656	ENSCDRG00005021656	9.15555	1.34177	0.653848	2.05211	0.0401588	0.432015	0	9.87781	0	5.46605	8.19529	16.8438	6.55502	16.5795	15.7529	12.2851	nan
ENSCDRG00005018506	ENSCDRG00005018506	95.1388	0.510854	0.248945	2.05208	0.0401624	0.432015	49.8679	105.693	87.5304	77.6179	62.1476	144.659	139.84	78.7527	104.542	100.738	polypyrimidine tract binding protein 1 [Source:HGNC Symbol;Acc:HGNC:9583]
ENSCDRG00005001438	ENSCDRG00005001438	258.969	0.410384	0.200036	2.05155	0.040213	0.432276	177.308	224.226	156.225	279.862	264.981	349.757	255.646	238.627	335.107	307.947	nan
SDC3	ENSCDRG00005015511	1223.34	-0.288733	0.140818	-2.05041	0.0403248	0.432913	1390.76	1287.08	1556.71	1299.28	1186.27	1129.53	1420.25	1006.61	974.53	982.401	syndecan 3 [Source:NCBI gene;Acc:105085830]
TRPV4	ENSCDRG00005011686	9.95986	-1.79916	0.877443	-2.05046	0.0403198	0.432913	11.0818	8.89003	46.5351	1.63982	10.2441	0.990814	0	9.47401	7.87644	2.86653	transient receptor potential cation channel subfamily V member 4 [Source:HGNC Symbol;Acc:HGNC:18083]
CDH23	ENSCDRG00005010398	205.697	0.532303	0.259857	2.04845	0.0405159	0.43468	227.176	179.776	208.3	114.787	120.881	376.509	231.611	171.716	219.824	206.39	cadherin related 23 [Source:HGNC Symbol;Acc:HGNC:13733]
CHPT1	ENSCDRG00005011388	65.611	0.536849	0.262138	2.04796	0.0405637	0.43491	44.327	41.4868	64.2628	53.5673	64.1964	79.2651	43.7001	73.4236	89.505	102.376	choline phosphotransferase 1 [Source:HGNC Symbol;Acc:HGNC:17852]
CCDC47	ENSCDRG00005021210	201.999	0.295155	0.144167	2.04731	0.0406279	0.435314	166.226	161.008	182.817	198.964	193.955	213.025	205.391	246.916	244.886	206.8	coiled-coil domain containing 47 [Source:NCBI gene;Acc:105090408]
ENSCDRG00005009853	ENSCDRG00005009853	13.326	-1.23255	0.602128	-2.04699	0.0406589	0.435363	33.2453	18.7678	23.2676	9.29229	8.87823	1.98163	17.4801	5.92125	10.7406	3.68554	nan
GLI1	ENSCDRG00005018398	51.7386	-0.917273	0.448339	-2.04593	0.0407628	0.436191	160.685	45.4379	58.7229	29.5167	48.4888	20.8071	72.1052	26.0535	26.4935	29.0748	GLI family zinc finger 1 [Source:NCBI gene;Acc:105100348]
KCNC1	ENSCDRG00005013940	77.8876	-0.476096	0.232793	-2.04515	0.0408402	0.436735	144.063	96.8026	70.9107	67.2324	83.3188	64.4029	76.4752	59.2125	55.8511	60.6067	potassium voltage-gated channel subfamily C member 1 [Source:NCBI gene;Acc:105086666]
STXBP6	ENSCDRG00005012893	119.329	-0.498173	0.243643	-2.04468	0.0408862	0.436943	116.358	122.485	149.577	178.74	132.491	75.3019	72.1052	107.767	87.3568	151.107	syntaxin binding protein 6 [Source:NCBI gene;Acc:105094199]
ACTG2	ENSCDRG00005005885	13.6653	-1.31511	0.643448	-2.04385	0.040968	0.437533	22.1635	19.7556	6.64788	10.3855	36.8788	0.990814	17.4801	7.10551	10.7406	4.50455	actin gamma 2, smooth muscle [Source:NCBI gene;Acc:105096564]
ABCG2	ENSCDRG00005000132	157.327	0.6251	0.306103	2.04212	0.0411392	0.438234	121.899	137.302	58.7229	145.397	155.711	276.437	104.88	133.82	238.441	200.657	ATP binding cassette subfamily G member 2 (Junior blood group) [Source:NCBI gene;Acc:105091571]
LRPAP1	ENSCDRG00005002510	453.87	0.305008	0.149397	2.04159	0.0411919	0.438234	415.566	377.332	407.736	431.818	395.423	422.087	605.247	578.507	401.698	503.281	LDL receptor related protein associated protein 1 [Source:NCBI gene;Acc:105103929]
PGK1	ENSCDRG00005021108	664.231	0.449471	0.220078	2.04232	0.0411195	0.438234	465.434	452.404	440.976	833.573	609.866	655.919	568.102	917.795	703.151	995.096	phosphoglycerate kinase 1 [Source:NCBI gene;Acc:105095559]
ENSCDRG00005000343	ENSCDRG00005000343	8.13956	-2.09388	1.02562	-2.04158	0.0411935	0.438234	49.8679	7.90225	5.5399	1.09321	4.09765	0.990814	0	1.77638	9.30851	0.819009	olfactory receptor 11H6-like [Source:NCBI gene;Acc:105097682]
ENSCDRG00005015326	ENSCDRG00005015326	454.054	0.496663	0.24321	2.04212	0.0411397	0.438234	387.861	369.43	469.783	284.781	368.105	657.901	817.193	322.708	430.34	432.437	nan
ADCK5	ENSCDRG00005017394	137.553	0.604015	0.295812	2.04188	0.0411629	0.438234	160.685	122.485	83.0984	84.1772	101.758	244.731	233.796	106.583	134.615	103.605	aarF domain containing kinase 5 [Source:NCBI gene;Acc:105104993]
ZNF641	ENSCDRG00005010093	39.4038	-0.568612	0.278555	-2.04129	0.0412217	0.43825	44.327	45.4379	58.7229	44.8216	45.757	34.6785	13.11	34.9354	35.802	36.4459	zinc finger protein 641 [Source:NCBI gene;Acc:105103796]
HYOU1	ENSCDRG00005020543	996.937	0.355906	0.174422	2.0405	0.041301	0.43881	892.081	712.19	900.787	900.805	963.63	857.054	1466.14	1168.86	853.519	1254.31	hypoxia up-regulated 1 [Source:HGNC Symbol;Acc:HGNC:16931]
COL12A1	ENSCDRG00005020641	131.469	-0.585093	0.286846	-2.03975	0.0413755	0.439317	182.849	148.167	86.4224	166.168	210.346	85.21	63.3652	94.148	165.405	112.614	collagen type XII alpha 1 chain [Source:HGNC Symbol;Acc:HGNC:2188]
KCP	ENSCDRG00005007916	38.5596	-1.05725	0.5185	-2.03906	0.0414436	0.439757	99.7358	46.4257	78.6665	13.1185	28.6835	28.7336	4.37001	30.1984	34.3699	21.2942	kielin cysteine rich BMP regulator [Source:HGNC Symbol;Acc:HGNC:17585]
KLHL40	ENSCDRG00005020531	16.492	-1.05187	0.515984	-2.03856	0.0414935	0.440002	44.327	13.8289	32.1314	16.3982	9.56117	15.853	2.18501	10.0661	10.7406	9.82811	kelch like family member 40 [Source:HGNC Symbol;Acc:HGNC:30372]
SIPA1L2	ENSCDRG00005011447	445.895	0.386882	0.189963	2.03662	0.0416886	0.441419	349.075	501.793	398.873	356.933	318.25	658.891	587.767	406.198	476.166	405	signal induced proliferation associated 1 like 2 [Source:HGNC Symbol;Acc:HGNC:23800]
DNAJC1	ENSCDRG00005018321	79.4609	0.420463	0.206471	2.03643	0.0417076	0.441419	72.0314	50.3768	89.7463	61.7664	67.6112	93.1365	93.9553	85.2661	93.0851	87.634	DnaJ heat shock protein family (Hsp40) member C1 [Source:HGNC Symbol;Acc:HGNC:20090]
E2F5	ENSCDRG00005017204	52.5884	0.545417	0.267818	2.03652	0.0416981	0.441419	27.7044	42.4746	29.9154	60.1266	47.8059	61.4305	56.8102	62.1732	57.9992	79.4439	E2F transcription factor 5 [Source:HGNC Symbol;Acc:HGNC:3119]
SKIL	ENSCDRG00005005548	140.293	0.547805	0.269126	2.0355	0.0418008	0.441784	38.7861	100.754	129.634	140.477	146.832	195.19	107.065	160.466	221.972	161.754	SKI like proto-oncogene [Source:NCBI gene;Acc:105085956]
AR	ENSCDRG00005013801	32.6355	-0.598911	0.294265	-2.03528	0.0418227	0.441784	55.4088	36.5479	36.5633	37.1691	34.83	18.8255	26.2201	20.7244	35.0859	24.9798	androgen receptor [Source:HGNC Symbol;Acc:HGNC:644]
ENSCDRG00005011549	ENSCDRG00005011549	5.60094	-2.08828	1.02578	-2.03581	0.0417699	0.441784	33.2453	2.96334	6.64788	1.63982	2.04882	0	4.37001	0.592125	2.86416	1.63802	nan
GCN1	ENSCDRG00005017762	570.49	0.360072	0.17696	2.03476	0.0418746	0.442048	498.679	550.194	484.187	402.301	555.914	666.818	902.408	525.807	579.276	539.317	GCN1 activator of EIF2AK4 [Source:NCBI gene;Acc:105104939]
ETAA1	ENSCDRG00005007526	73.6938	0.453961	0.223159	2.03425	0.0419266	0.442313	44.327	48.4013	58.7229	83.084	68.977	76.2927	87.4003	94.7401	84.4927	90.5005	ETAA1 activator of ATR kinase [Source:HGNC Symbol;Acc:HGNC:24648]
ENSCDRG00005003186	ENSCDRG00005003186	78.0859	0.748902	0.368249	2.03368	0.0419836	0.442631	11.0818	63.218	36.5633	89.0966	81.9529	117.907	48.0702	103.622	93.8012	135.546	nan
NUP54	ENSCDRG00005001150	47.8479	0.569878	0.280331	2.03288	0.0420649	0.44286	44.327	33.5846	53.183	41.542	22.5371	67.3754	56.8102	47.37	54.419	57.3306	nucleoporin 54 [Source:HGNC Symbol;Acc:HGNC:17359]
SERTAD1	ENSCDRG00005010809	16.5793	0.891835	0.438843	2.03224	0.042129	0.44286	5.54088	14.8167	9.97181	15.8515	8.19529	32.6969	28.4051	14.8031	15.0368	20.4752	SERTA domain containing 1 [Source:HGNC Symbol;Acc:HGNC:17932]
PC	ENSCDRG00005013184	317.187	0.288387	0.141983	2.03113	0.0422413	0.44286	299.207	281.518	264.807	314.845	264.298	329.941	432.631	325.669	298.589	360.364	pyruvate carboxylase [Source:NCBI gene;Acc:105104442]
PDX1	ENSCDRG00005003496	5.63966	-6.17302	3.03715	-2.03251	0.0421024	0.44286	55.4088	0.987781	0	0	0	0	0	0	0	0	pancreatic and duodenal homeobox 1 [Source:HGNC Symbol;Acc:HGNC:6107]
FN3K	ENSCDRG00005009236	109.185	-0.435685	0.214451	-2.03163	0.0421915	0.44286	171.767	99.7659	88.6383	147.037	129.759	75.3019	83.0303	100.069	100.246	96.2336	fructosamine 3 kinase [Source:NCBI gene;Acc:105102232]
RND2	ENSCDRG00005011232	75.0289	-0.529997	0.260944	-2.03107	0.0422476	0.44286	49.8679	108.656	89.7463	83.6306	102.441	53.504	83.0303	79.9369	40.0982	59.3782	Rho family GTPase 2 [Source:NCBI gene;Acc:105090492]
ENSCDRG00005009369	ENSCDRG00005009369	44.737	-0.687005	0.338117	-2.03186	0.0421681	0.44286	27.7044	67.1691	60.9389	54.1139	66.2453	30.7152	10.925	44.4094	34.3699	50.7786	nan
RAB36	ENSCDRG00005022068	285.348	-0.420237	0.206741	-2.03268	0.0420852	0.44286	332.453	280.53	404.412	313.751	297.079	194.2	353.971	268.233	169.701	239.151	RAB36, member RAS oncogene family [Source:HGNC Symbol;Acc:HGNC:9775]
NEIL2	ENSCDRG00005010687	88.735	-0.479747	0.236157	-2.03147	0.0422072	0.44286	83.1132	94.827	94.1782	122.986	116.783	45.5774	85.2153	97.1086	78.7644	68.7968	nei like DNA glycosylase 2 [Source:NCBI gene;Acc:105101910]
ENSCDRG00005019838	ENSCDRG00005019838	70.774	-0.55175	0.271796	-2.03001	0.0423552	0.44314	144.063	91.8636	69.8027	61.2198	61.4647	53.504	78.6603	49.7385	45.8265	51.5976	tetraspanin 31 [Source:NCBI gene;Acc:105100332]
SLC5A8	ENSCDRG00005016273	10.9421	-1.46148	0.719777	-2.03046	0.0423093	0.44314	16.6226	13.8289	35.4553	4.91945	8.87823	0	10.925	6.51338	8.59248	3.68554	solute carrier family 5 member 8 [Source:HGNC Symbol;Acc:HGNC:19119]
SERINC3	ENSCDRG00005013447	396.979	0.443199	0.218321	2.03004	0.0423527	0.44314	221.635	329.919	291.399	435.644	393.374	436.949	308.086	554.229	400.266	598.286	serine incorporator 3 [Source:NCBI gene;Acc:105087111]
ENSCDRG00005000676	ENSCDRG00005000676	11.2837	-1.03238	0.508725	-2.02934	0.0424235	0.443409	22.1635	4.93891	21.0516	14.2117	15.7076	6.9357	4.37001	7.69763	7.1604	8.59959	nan
GRHL3	ENSCDRG00005003967	15.6446	-1.6717	0.823812	-2.02923	0.0424349	0.443409	77.5723	16.7923	15.5117	2.18642	10.9271	7.92651	0	12.4346	11.4566	1.63802	grainyhead like transcription factor 3 [Source:NCBI gene;Acc:105097279]
ENSCDRG00005000829	ENSCDRG00005000829	6.38696	-2.22383	1.09661	-2.02791	0.0425691	0.444529	33.2453	2.96334	15.5117	0	2.73176	0.990814	0	1.77638	5.01228	1.63802	nan
CFAP45	ENSCDRG00005011122	21.5654	-1.20007	0.591942	-2.02733	0.0426282	0.444864	77.5723	17.7801	32.1314	18.038	10.9271	19.8163	0	11.2504	17.901	10.2376	cilia and flagella associated protein 45 [Source:NCBI gene;Acc:105086535]
PURA	ENSCDRG00005000128	97.4638	-0.381564	0.188356	-2.02576	0.0427898	0.445702	138.522	102.729	121.878	95.6559	96.9776	76.2927	104.88	78.1606	75.1842	84.3579	purine rich element binding protein A [Source:HGNC Symbol;Acc:HGNC:9701]
APBA1	ENSCDRG00005002013	268.463	-0.397937	0.196434	-2.02581	0.0427846	0.445702	293.667	289.42	290.291	320.857	324.397	168.438	329.936	274.746	175.43	217.447	amyloid beta precursor protein binding family A member 1 [Source:HGNC Symbol;Acc:HGNC:578]
H1-10	ENSCDRG00005010548	123.941	-0.35909	0.177231	-2.02611	0.042753	0.445702	127.44	147.179	141.821	138.838	133.173	102.054	142.025	119.609	98.8135	88.453	H1.10 linker histone [Source:HGNC Symbol;Acc:HGNC:4722]
DEPTOR	ENSCDRG00005021847	70.6855	-0.513645	0.253625	-2.02521	0.0428453	0.445998	27.7044	78.0347	103.042	98.3889	97.6606	49.5407	63.3652	63.3574	70.8879	54.8736	DEP domain containing MTOR interacting protein [Source:NCBI gene;Acc:105096139]
SLC43A2	ENSCDRG00005011286	151.275	-0.329654	0.162834	-2.02448	0.0429208	0.446359	171.767	150.143	198.328	151.956	168.003	135.742	157.321	112.504	133.899	133.089	solute carrier family 43 member 2 [Source:NCBI gene;Acc:105088118]
CTCFL	ENSCDRG00005018103	11.8279	-1.76377	0.87128	-2.02435	0.0429343	0.446359	44.327	13.8289	28.8075	2.18642	2.73176	1.98163	10.925	5.92125	7.1604	0.409505	CCCTC-binding factor like [Source:HGNC Symbol;Acc:HGNC:16234]
GNPNAT1	ENSCDRG00005001646	20.2592	0.831367	0.410852	2.02352	0.0430195	0.446399	5.54088	15.8045	11.0798	21.3176	15.7076	26.752	19.6651	34.9354	15.7529	36.0364	glucosamine-phosphate N-acetyltransferase 1 [Source:NCBI gene;Acc:105091427]
ENSCDRG00005015378	ENSCDRG00005015378	7.97382	-1.56074	0.771288	-2.02355	0.0430166	0.446399	5.54088	6.91447	28.8075	7.65247	11.61	1.98163	0	10.0661	1.43208	5.73306	nan
PDHX	ENSCDRG00005017404	60.7882	0.472518	0.23351	2.02354	0.0430174	0.446399	27.7044	63.218	42.1032	59.0333	53.9523	72.3294	72.1052	64.5417	67.3077	85.5864	pyruvate dehydrogenase complex component X [Source:HGNC Symbol;Acc:HGNC:21350]
TRAF1	ENSCDRG00005011825	217.324	0.349557	0.172785	2.02307	0.0430659	0.446598	216.094	211.385	176.169	168.354	184.394	266.529	312.456	195.994	236.293	205.571	TNF receptor associated factor 1 [Source:HGNC Symbol;Acc:HGNC:12031]
MBOAT2	ENSCDRG00005016283	94.5733	0.419666	0.207521	2.02228	0.0431474	0.44715	88.6541	74.0836	58.7229	84.1772	100.392	101.063	107.065	91.1873	113.85	126.537	membrane bound O-acyltransferase domain containing 2 [Source:NCBI gene;Acc:105091257]
EFNB3	ENSCDRG00005009608	87.4627	-0.871982	0.431307	-2.02172	0.0432053	0.44715	110.818	119.522	115.23	113.694	99.7094	21.7979	168.246	51.5149	28.6416	45.455	ephrin B3 [Source:NCBI gene;Acc:105103009]
ENSCDRG00005020372	ENSCDRG00005020372	11.2304	-1.56169	0.77254	-2.0215	0.0432278	0.44715	55.4088	9.87781	12.1878	8.74568	2.04882	1.98163	2.18501	10.6583	4.29624	4.91405	nan
ENSCDRG00005015270	ENSCDRG00005015270	7.40347	-1.82621	0.903363	-2.02157	0.0432209	0.44715	38.7861	6.91447	8.86383	0.546605	4.09765	0.990814	6.55502	2.3685	2.86416	2.04752	olfactory receptor 8G1-like [Source:NCBI gene;Acc:105094486]
CCDC18	ENSCDRG00005002211	113.434	0.452521	0.223888	2.0212	0.0432595	0.447196	55.4088	93.8392	90.8543	119.16	111.319	137.723	83.0303	135.597	151.8	155.612	coiled-coil domain containing 18 [Source:NCBI gene;Acc:105085319]
STAC3	ENSCDRG00005017976	12.7957	-1.24053	0.613867	-2.02084	0.0432966	0.447298	33.2453	16.7923	27.6995	4.91945	10.2441	9.90814	2.18501	7.10551	12.1727	3.68554	SH3 and cysteine rich domain 3 [Source:NCBI gene;Acc:105098311]
DLEC1	ENSCDRG00005017249	163.73	0.55708	0.275713	2.02051	0.0433303	0.447366	127.44	143.228	190.572	98.9355	99.0264	241.759	297.161	130.86	165.405	142.917	DLEC1 cilia and flagella associated protein [Source:NCBI gene;Acc:105090725]
NME8	ENSCDRG00005013336	5.5337	-1.86123	0.921793	-2.01914	0.0434728	0.447599	22.1635	4.93891	9.97181	1.63982	6.82941	0	0	3.55275	5.01228	1.22851	NME/NM23 family member 8 [Source:NCBI gene;Acc:105097365]
PIPOX	ENSCDRG00005010866	6.6814	-1.50692	0.746404	-2.0189	0.0434974	0.447599	11.0818	9.87781	14.4037	3.27963	12.2929	1.98163	0	8.88188	2.14812	2.86653	pipecolic acid and sarcosine oxidase [Source:NCBI gene;Acc:105088162]
IRAK2	ENSCDRG00005014940	66.9563	0.510202	0.252695	2.01904	0.043483	0.447599	66.4905	60.2546	62.0468	44.8216	46.44	110.971	74.2902	69.2787	78.0483	56.9211	interleukin 1 receptor associated kinase 2 [Source:NCBI gene;Acc:105093117]
SLC6A11	ENSCDRG00005015983	249.82	-0.311629	0.154389	-2.01847	0.0435425	0.447599	277.044	211.385	288.075	312.111	293.665	189.245	231.611	223.823	245.602	225.637	solute carrier family 6 member 11 [Source:HGNC Symbol;Acc:HGNC:11044]
SPCS3	ENSCDRG00005021218	161.579	0.638357	0.31626	2.01846	0.0435434	0.447599	66.4905	109.644	103.042	176.007	170.052	175.374	89.5853	243.956	176.146	305.49	signal peptidase complex subunit 3 [Source:NCBI gene;Acc:105084413]
MVK	ENSCDRG00005011437	141.395	-0.351867	0.174307	-2.01866	0.0435223	0.447599	199.472	155.082	162.873	135.011	146.149	138.714	139.84	123.754	113.134	99.9191	mevalonate kinase [Source:HGNC Symbol;Acc:HGNC:7530]
ENSCDRG00005012234	ENSCDRG00005012234	9.52639	-1.47534	0.730861	-2.01863	0.0435258	0.447599	38.7861	15.8045	12.1878	3.27963	4.09765	4.95407	0	5.92125	5.72832	4.50455	nan
ENSCDRG00005008083	ENSCDRG00005008083	30.0422	0.675409	0.334713	2.01787	0.0436046	0.447948	11.0818	24.6945	13.2958	30.6099	30.0494	31.706	41.5151	47.37	33.6539	36.4459	transmembrane emp24 domain-containing protein 9-like [Source:NCBI gene;Acc:105099600]
ENSCDRG00005006253	ENSCDRG00005006253	59.5527	-0.461498	0.228771	-2.0173	0.0436647	0.448285	77.5723	69.1447	66.4788	74.3383	56.6841	40.6234	65.5502	57.4362	45.1105	42.5885	nan
TSPO	ENSCDRG00005005369	46.1019	0.557244	0.276283	2.01693	0.0437025	0.448394	49.8679	43.4624	19.9436	42.0886	35.5129	63.4121	45.8851	61.5811	47.2586	52.0071	translocator protein [Source:HGNC Symbol;Acc:HGNC:1158]
ENSCDRG00005010414	ENSCDRG00005010414	16.9603	-1.73548	0.8608	-2.01612	0.0437875	0.448706	66.4905	30.6212	18.8356	0	15.7076	4.95407	10.925	3.55275	16.4689	2.04752	nan
CD9	ENSCDRG00005010377	168.871	0.47408	0.235124	2.0163	0.0437688	0.448706	66.4905	202.495	96.3942	167.808	157.759	204.108	196.651	182.967	216.244	197.791	CD9 molecule [Source:NCBI gene;Acc:105098229]
ENSCDRG00005004771	ENSCDRG00005004771	8.94845	1.3554	0.672544	2.01533	0.0438706	0.44909	0	4.93891	8.86383	3.27963	5.46353	15.853	24.0351	13.0268	2.14812	11.8756	nan
RNMT	ENSCDRG00005020824	89.4641	0.504083	0.250135	2.01524	0.0438796	0.44909	27.7044	88.9003	65.3708	90.1898	85.3676	94.1273	100.51	120.794	84.4927	137.184	RNA guanine-7 methyltransferase [Source:NCBI gene;Acc:105086464]
KRT35	ENSCDRG00005010292	5.4582	-2.13188	1.05845	-2.01415	0.0439938	0.449979	27.7044	3.95112	11.0798	0	3.4147	2.97244	0	1.77638	2.86416	0.819009	keratin 35 [Source:HGNC Symbol;Acc:HGNC:6453]
PRRG3	ENSCDRG00005017332	21.4354	-0.886164	0.440268	-2.01278	0.0441376	0.451005	5.54088	28.6457	46.5351	32.2497	23.9029	12.8806	13.11	21.9086	7.87644	21.7037	proline rich and Gla domain 3 [Source:NCBI gene;Acc:105088657]
MILR1	ENSCDRG00005020792	18.0039	1.00354	0.498609	2.01267	0.044149	0.451005	11.0818	19.7556	11.0798	9.83889	8.19529	48.5499	15.295	14.8031	27.9255	13.5136	mast cell immunoglobulin like receptor 1 [Source:NCBI gene;Acc:105092319]
HSP90B1	ENSCDRG00005006969	1361.17	0.472878	0.234988	2.01236	0.0441825	0.451067	615.038	978.891	1095.79	1572.58	1421.88	1478.29	1127.46	1903.09	1431.36	1987.33	heat shock protein 90 beta family member 1 [Source:NCBI gene;Acc:105097473]
ENSCDRG00005000209	ENSCDRG00005000209	37.2139	-0.634245	0.315384	-2.01102	0.0443232	0.451294	44.327	59.2669	49.8591	45.3682	25.2688	23.7795	43.7001	29.6063	24.3453	26.6178	nan
MAP3K14	ENSCDRG00005006138	65.4738	0.7743	0.385062	2.01084	0.0443418	0.451294	77.5723	46.4257	42.1032	39.9022	38.9276	75.3019	174.801	45.0015	73.7521	40.9505	mitogen-activated protein kinase kinase kinase 14 [Source:HGNC Symbol;Acc:HGNC:6853]
SLC13A3	ENSCDRG00005009772	41.9251	-0.573764	0.285273	-2.01128	0.0442958	0.451294	27.7044	49.3891	74.2346	38.809	54.6353	35.6693	43.7001	34.9354	28.6416	31.5318	solute carrier family 13 member 3 [Source:NCBI gene;Acc:105087853]
GSDMD	ENSCDRG00005014546	71.7959	0.800421	0.397985	2.01118	0.044306	0.451294	94.1949	47.4135	57.6149	31.1565	39.6106	168.438	111.435	39.6724	72.32	56.1021	gasdermin D [Source:NCBI gene;Acc:105105691]
SBNO2	ENSCDRG00005012673	140.777	0.675821	0.336049	2.01108	0.0443169	0.451294	94.1949	143.228	122.986	67.779	110.636	324.987	201.021	98.885	142.492	101.557	strawberry notch homolog 2 [Source:HGNC Symbol;Acc:HGNC:29158]
ATP6AP1	ENSCDRG00005012618	365.408	0.342676	0.170437	2.01057	0.0443704	0.451305	260.421	275.591	344.582	374.971	341.47	360.656	487.257	467.779	312.193	429.161	ATPase H+ transporting accessory protein 1 [Source:NCBI gene;Acc:105106493]
MYOZ1	ENSCDRG00005014866	17.6186	-0.861015	0.42859	-2.00895	0.0445424	0.452775	44.327	16.7923	18.8356	19.1312	16.3906	10.899	21.8501	7.69763	10.0246	10.2376	myozenin 1 [Source:NCBI gene;Acc:105092458]
ENSCDRG00005010875	ENSCDRG00005010875	7.02992	-1.67246	0.832886	-2.00803	0.0446404	0.45349	27.7044	6.91447	11.0798	3.82624	6.82941	0	0	4.737	7.1604	2.04752	nan
SLCO1A2	ENSCDRG00005018304	283.866	0.667578	0.3325	2.00775	0.0446696	0.453507	138.522	231.141	130.742	339.988	249.956	541.975	159.506	226.784	360.168	459.874	solute carrier organic anion transporter family member 1A2 [Source:NCBI gene;Acc:105096488]
KIDINS220	ENSCDRG00005015440	1084.9	-0.360376	0.179615	-2.00638	0.044816	0.454712	980.736	1069.77	1208.81	1599.37	1235.44	810.486	738.532	1159.97	885.741	1160.13	kinase D interacting substrate 220 [Source:NCBI gene;Acc:105091232]
OSBPL11	ENSCDRG00005020837	64.2689	0.518073	0.258439	2.00462	0.0450033	0.455204	44.327	72.108	36.5633	67.2324	40.2935	75.3019	78.6603	66.3181	90.221	71.6633	oxysterol binding protein like 11 [Source:NCBI gene;Acc:105101309]
ABCB11	ENSCDRG00005009134	16.1	-1.21263	0.605024	-2.00427	0.0450411	0.455204	22.1635	16.7923	40.9952	7.10587	23.9029	12.8806	17.4801	13.0268	2.14812	4.50455	ATP binding cassette subfamily B member 11 [Source:NCBI gene;Acc:105091063]
TGFB1	ENSCDRG00005016190	130.744	0.612665	0.305704	2.00411	0.0450581	0.455204	83.1132	132.363	111.906	96.2025	88.0994	268.511	185.726	95.3322	158.961	87.2245	transforming growth factor beta 1 [Source:HGNC Symbol;Acc:HGNC:11766]
ENSCDRG00005020526	ENSCDRG00005020526	8.62859	-1.25837	0.627445	-2.00555	0.0449048	0.455204	11.0818	4.93891	21.0516	9.29229	15.7076	4.95407	0	7.69763	7.87644	3.68554	nan
TBKBP1	ENSCDRG00005018994	71.9257	0.749571	0.373878	2.00485	0.0449789	0.455204	16.6226	87.9125	63.1548	44.8216	45.0741	80.2559	179.171	68.0944	78.0483	56.1021	TBK1 binding protein 1 [Source:HGNC Symbol;Acc:HGNC:30140]
KRT17	ENSCDRG00005011420	7.9887	-1.97673	0.985757	-2.00529	0.0449318	0.455204	38.7861	12.8412	9.97181	1.63982	0.682941	0.990814	8.74003	2.96063	2.86416	0.409505	keratin 17 [Source:HGNC Symbol;Acc:HGNC:6427]
ENSCDRG00005013969	ENSCDRG00005013969	5.47297	-1.76352	0.879524	-2.00509	0.0449537	0.455204	11.0818	7.90225	17.7277	2.73303	4.09765	0.990814	0	6.51338	2.86416	0.819009	nan
NOS2	ENSCDRG00005015637	26.16	-0.944537	0.471404	-2.00367	0.0451057	0.455405	66.4905	33.5846	45.4271	10.9321	21.8541	11.8898	10.925	27.2378	16.4689	16.7897	nitric oxide synthase 2 [Source:HGNC Symbol;Acc:HGNC:7873]
LRATD2	ENSCDRG00005005133	54.9319	0.816489	0.40759	2.00321	0.0451544	0.455616	49.8679	66.1813	31.0234	21.8642	30.7323	92.1457	126.73	39.0803	42.9624	48.731	LRAT domain containing 2 [Source:HGNC Symbol;Acc:HGNC:24166]
ZNF185	ENSCDRG00005018034	39.9027	-0.60102	0.300393	-2.00078	0.0454163	0.455847	38.7861	55.3157	58.7229	38.809	51.2206	37.6509	13.11	33.159	30.0737	42.179	zinc finger protein 185 with LIM domain [Source:HGNC Symbol;Acc:HGNC:12976]
CHRNA1	ENSCDRG00005001973	7.88882	-1.5773	0.787643	-2.00256	0.0452249	0.455847	22.1635	10.8656	22.1596	2.18642	4.09765	2.97244	0	2.3685	7.1604	4.91405	cholinergic receptor nicotinic alpha 1 subunit [Source:NCBI gene;Acc:105097569]
EIF4EBP2	ENSCDRG00005009176	54.4425	0.528336	0.264032	2.00103	0.0453893	0.455847	55.4088	43.4624	31.0234	48.6478	45.757	90.1641	69.9202	55.6598	51.5549	52.8261	eukaryotic translation initiation factor 4E binding protein 2 [Source:HGNC Symbol;Acc:HGNC:3289]
PPP1R14C	ENSCDRG00005020905	13.2026	-1.06353	0.531584	-2.00068	0.0454267	0.455847	11.0818	11.8534	23.2676	18.5846	21.8541	0.990814	17.4801	8.28976	10.0246	8.59959	protein phosphatase 1 regulatory inhibitor subunit 14C [Source:HGNC Symbol;Acc:HGNC:14952]
ENSCDRG00005008441	ENSCDRG00005008441	9.68405	-1.38492	0.691685	-2.00225	0.0452583	0.455847	22.1635	17.7801	16.6197	1.63982	14.3418	4.95407	0	8.28976	5.72832	5.32356	Fc fragment of IgG binding protein [Source:NCBI gene;Acc:105093330]
CIAPIN1	ENSCDRG00005004075	128.226	-0.352531	0.176134	-2.00149	0.0453397	0.455847	138.522	116.558	147.361	178.74	136.588	103.045	109.25	125.531	115.282	111.385	cytokine induced apoptosis inhibitor 1 [Source:NCBI gene;Acc:105093818]
LRSAM1	ENSCDRG00005014315	238.173	-0.339628	0.169708	-2.00125	0.0453655	0.455847	254.88	237.067	240.431	344.908	254.737	189.245	168.246	229.153	234.145	228.913	leucine rich repeat and sterile alpha motif containing 1 [Source:NCBI gene;Acc:105092607]
HIGD1A	ENSCDRG00005020574	63.3536	0.659246	0.329455	2.00102	0.0453906	0.455847	55.4088	45.4379	18.8356	68.8722	58.05	51.5223	72.1052	72.2393	86.6408	104.424	HIG1 hypoxia inducible domain family member 1A [Source:NCBI gene;Acc:105084608]
ATP9A	ENSCDRG00005015920	1477.1	-0.377729	0.188783	-2.00086	0.0454071	0.455847	1601.31	1221.89	2050.87	1860.64	1609.69	858.045	1453.03	1546.63	1155.69	1413.2	ATPase phospholipid transporting 9A (putative) [Source:HGNC Symbol;Acc:HGNC:13540]
ENSCDRG00005014990	ENSCDRG00005014990	15.5644	1.3729	0.686373	2.00022	0.0454763	0.456066	5.54088	17.7801	8.86383	6.55926	4.09765	56.4764	4.37001	17.1716	28.6416	6.14257	nan
ENSCDRG00005006679	ENSCDRG00005006679	20.0777	1.16145	0.580772	1.99985	0.0455167	0.456193	5.54088	21.7312	3.32394	19.1312	10.2441	54.4948	6.55502	21.3165	20.7651	37.6744	nan
ZNF219	ENSCDRG00005002334	161.143	0.426794	0.213544	1.99863	0.0456488	0.456497	160.685	159.033	128.526	112.054	129.076	230.86	233.796	169.348	161.109	126.946	zinc finger protein 219 [Source:HGNC Symbol;Acc:HGNC:13011]
BCO1	ENSCDRG00005000320	13.49	-1.20276	0.601895	-1.99828	0.0456858	0.456497	49.8679	10.8656	19.9436	6.01266	11.61	2.97244	8.74003	7.69763	11.4566	5.73306	beta-carotene oxygenase 1 [Source:HGNC Symbol;Acc:HGNC:13815]
HLA-DRA	ENSCDRG00005021429	474.187	0.610493	0.305461	1.9986	0.0456522	0.456497	404.484	417.831	305.802	455.869	293.665	1130.52	443.556	375.408	607.202	307.538	mamu class II histocompatibility antigen, DR alpha chain [Source:NCBI gene;Acc:105101414]
ADAR	ENSCDRG00005003637	945.948	-0.232661	0.116416	-1.99852	0.0456598	0.456497	1019.52	848.504	1103.55	1121.09	1020.31	799.587	828.118	923.124	862.828	932.851	adenosine deaminase RNA specific [Source:NCBI gene;Acc:105089080]
SLC5A7	ENSCDRG00005018438	10.7542	-1.71845	0.85968	-1.99895	0.045614	0.456497	55.4088	10.8656	5.5399	1.63982	12.2929	8.91733	0	5.92125	5.72832	1.22851	solute carrier family 5 member 7 [Source:HGNC Symbol;Acc:HGNC:14025]
PIAS1	ENSCDRG00005003494	104.975	0.381107	0.190835	1.99705	0.0458195	0.456558	77.5723	79.0225	96.3942	107.135	88.7823	146.64	126.73	119.017	105.258	103.195	protein inhibitor of activated STAT 1 [Source:NCBI gene;Acc:105093280]
TTC7B	ENSCDRG00005004427	212.673	-0.31582	0.158192	-1.99644	0.0458862	0.456558	188.39	242.006	257.051	271.663	210.346	154.567	207.576	214.349	191.183	189.601	tetratricopeptide repeat domain 7B [Source:NCBI gene;Acc:105095991]
KBTBD7	ENSCDRG00005011400	32.1956	-0.648727	0.32479	-1.99737	0.0457846	0.456558	33.2453	34.5723	35.4553	48.6478	40.9765	16.8438	39.3301	27.2378	15.7529	29.8938	kelch repeat and BTB domain containing 7 [Source:HGNC Symbol;Acc:HGNC:25266]
NCKIPSD	ENSCDRG00005003450	119.474	-0.506485	0.253657	-1.99673	0.0458549	0.456558	155.145	92.8514	171.737	161.795	117.466	63.4121	144.21	100.661	105.974	81.4914	NCK interacting protein with SH3 domain [Source:NCBI gene;Acc:105087903]
C20orf27	ENSCDRG00005010769	80.5695	-0.50408	0.252423	-1.99697	0.0458288	0.456558	138.522	90.8759	72.0186	90.7364	92.88	70.3478	32.7751	81.1212	59.4313	76.9868	chromosome unknown open reading frame, human C20orf27 [Source:NCBI gene;Acc:105096021]
IGSF9	ENSCDRG00005011409	17.2627	-1.68238	0.842513	-1.99686	0.0458403	0.456558	88.6541	11.8534	27.6995	2.18642	4.78059	2.97244	4.37001	13.0268	15.0368	2.04752	immunoglobulin superfamily member 9 [Source:NCBI gene;Acc:105086537]
SYDE1	ENSCDRG00005011837	44.3217	0.619336	0.310181	1.99669	0.0458587	0.456558	38.7861	43.4624	34.3474	22.4108	35.5129	54.4948	76.4752	36.1197	62.2954	39.3124	synapse defective Rho GTPase homolog 1 [Source:HGNC Symbol;Acc:HGNC:25824]
SYCP3	ENSCDRG00005011273	11.6769	1.01803	0.510071	1.99585	0.0459498	0.456638	5.54088	3.95112	6.64788	12.5719	8.87823	13.8714	10.925	18.3559	11.4566	24.5703	synaptonemal complex protein 3 [Source:NCBI gene;Acc:105097457]
HOMER2	ENSCDRG00005015958	61.6788	-0.474793	0.237878	-1.99595	0.0459396	0.456638	66.4905	79.0225	60.9389	88.0034	66.2453	52.5131	34.9601	50.9228	50.1228	67.5682	homer scaffold protein 2 [Source:HGNC Symbol;Acc:HGNC:17513]
PDAP1	ENSCDRG00005012264	104.984	-0.392418	0.196728	-1.99473	0.0460726	0.457582	127.44	116.558	120.77	126.266	111.319	105.026	56.8102	79.3448	105.974	100.329	PDGFA associated protein 1 [Source:NCBI gene;Acc:105099362]
ATXN3L	ENSCDRG00005000124	91.6463	0.470274	0.235821	1.9942	0.0461304	0.457879	27.7044	87.9125	70.9107	95.6559	85.3676	89.1733	133.285	124.346	103.826	98.2811	ataxin 3 like [Source:HGNC Symbol;Acc:HGNC:24173]
MB21D2	ENSCDRG00005011736	27.5272	-0.877812	0.440562	-1.99248	0.046318	0.458439	66.4905	22.719	17.7277	36.0759	39.6106	9.90814	21.8501	27.8299	9.30851	23.7513	Mab-21 domain containing 2 [Source:HGNC Symbol;Acc:HGNC:30438]
PRPS2	ENSCDRG00005010248	32.1999	0.695792	0.349367	1.99158	0.0464174	0.458439	33.2453	20.7434	28.8075	19.6778	24.5859	64.4029	24.0351	45.0015	33.6539	27.8463	phosphoribosyl pyrophosphate synthetase 2 [Source:NCBI gene;Acc:105100604]
RPGRIP1	ENSCDRG00005002465	35.1136	-0.641453	0.322141	-1.99122	0.0464565	0.458439	72.0314	41.4868	46.5351	30.6099	30.0494	17.8347	28.4051	23.0929	33.6539	27.4368	RPGR interacting protein 1 [Source:HGNC Symbol;Acc:HGNC:13436]
NEB	ENSCDRG00005021457	122.647	-0.644932	0.323845	-1.99148	0.0464278	0.458439	265.962	130.387	183.925	89.0966	86.0506	61.4305	142.025	94.148	100.962	72.4823	nebulin [Source:HGNC Symbol;Acc:HGNC:7720]
HHEX	ENSCDRG00005015775	15.6611	0.955131	0.479486	1.99199	0.0463724	0.458439	0	9.87781	4.43192	14.2117	19.1223	16.8438	26.2201	24.8693	22.1972	18.8372	hematopoietically expressed homeobox [Source:HGNC Symbol;Acc:HGNC:4901]
MEAK7	ENSCDRG00005001698	55.2664	-0.492727	0.247294	-1.99247	0.046319	0.458439	83.1132	63.218	64.2628	67.2324	52.5865	33.6877	32.7751	51.5149	57.9992	46.274	MTOR associated protein, eak-7 homolog [Source:HGNC Symbol;Acc:HGNC:29325]
ENSCDRG00005020465	ENSCDRG00005020465	282.397	-0.41335	0.207601	-1.99108	0.0464723	0.458439	349.075	252.872	303.586	415.42	297.079	208.071	211.946	297.839	176.862	311.223	nan
ENSCDRG00005010074	ENSCDRG00005010074	11.2755	-1.27481	0.640399	-1.99065	0.0465198	0.458439	33.2453	15.8045	21.0516	6.01266	7.51235	5.94488	0	9.47401	10.0246	3.68554	nan
ENSCDRG00005017224	ENSCDRG00005017224	114	-0.491723	0.246866	-1.99186	0.0463865	0.458439	227.176	82.9736	135.173	109.868	122.929	107.999	107.065	83.4897	77.3323	85.9959	nan
ENSCDRG00005011508	ENSCDRG00005011508	221.527	0.339148	0.170356	1.99082	0.0465004	0.458439	210.553	161.008	181.709	215.362	211.029	198.163	275.311	278.891	207.651	275.597	YjeF N-terminal domain containing 3 [Source:HGNC Symbol;Acc:HGNC:24785]
MED16	ENSCDRG00005018266	153.725	-0.331558	0.166559	-1.99063	0.0465212	0.458439	221.635	154.094	165.089	154.689	169.369	160.512	142.025	124.346	129.603	115.89	mediator complex subunit 16 [Source:HGNC Symbol;Acc:HGNC:17556]
ENSCDRG00005016163	ENSCDRG00005016163	8.95418	-2.31928	1.1648	-1.99113	0.0464665	0.458439	49.8679	3.95112	9.97181	0	10.2441	0	10.925	0.592125	3.5802	0.409505	nan
ENSCDRG00005011104	ENSCDRG00005011104	8.17225	-1.26006	0.633262	-1.9898	0.0466134	0.459072	16.6226	13.8289	8.86383	3.27963	15.7076	5.94488	4.37001	5.32913	5.72832	2.04752	nan
ENSCDRG00005008740	ENSCDRG00005008740	14.3852	-1.70568	0.857552	-1.98901	0.0466997	0.459078	60.9497	14.8167	25.4835	1.09321	8.19529	1.98163	17.4801	10.0661	2.14812	1.63802	nan
ARG1	ENSCDRG00005021864	6.77729	-2.11917	1.06583	-1.98827	0.0467815	0.459078	38.7861	3.95112	3.32394	0	10.2441	0	4.37001	1.77638	2.86416	2.45703	arginase 1 [Source:HGNC Symbol;Acc:HGNC:663]
ENSCDRG00005015601	ENSCDRG00005015601	175.548	0.468657	0.235681	1.98852	0.0467539	0.459078	60.9497	195.581	114.122	176.007	172.101	248.694	194.466	173.493	219.824	200.248	nan
ANXA1	ENSCDRG00005000515	88.2457	0.875579	0.440144	1.9893	0.0466681	0.459078	22.1635	99.7659	21.0516	72.6985	89.4653	187.264	45.8851	92.9637	161.109	90.091	annexin A1 [Source:NCBI gene;Acc:105106132]
ARHGAP27	ENSCDRG00005006198	73.9546	0.758757	0.381606	1.98832	0.0467758	0.459078	99.7358	63.218	50.967	37.1691	33.4641	177.356	80.8453	46.7779	84.4927	65.5207	Rho GTPase activating protein 27 [Source:HGNC Symbol;Acc:HGNC:31813]
NAA38	ENSCDRG00005010184	25.0677	-0.899185	0.452037	-1.98918	0.0466809	0.459078	44.327	24.6945	23.2676	32.7963	43.0253	15.853	0	22.5008	17.185	27.0273	N(alpha)-acetyltransferase 38, NatC auxiliary subunit [Source:NCBI gene;Acc:105103006]
AP1G2	ENSCDRG00005014627	89.4621	-0.383456	0.192933	-1.98751	0.046866	0.459359	77.5723	112.607	104.15	94.5627	107.222	69.357	107.065	76.9763	73.036	72.0728	adaptor related protein complex 1 subunit gamma 2 [Source:NCBI gene;Acc:105102402]
MPP7	ENSCDRG00005020016	21.9062	-0.797113	0.401032	-1.98765	0.04685	0.459359	49.8679	26.6701	23.2676	18.5846	27.3176	7.92651	8.74003	19.5401	17.901	19.2467	membrane palmitoylated protein 7 [Source:HGNC Symbol;Acc:HGNC:26542]
TSPYL2	ENSCDRG00005020210	789.613	0.387449	0.194986	1.98706	0.046916	0.459576	637.201	530.438	599.417	799.683	850.261	677.717	902.408	1126.22	700.287	1072.49	TSPY like 2 [Source:HGNC Symbol;Acc:HGNC:24358]
EEF1AKMT2	ENSCDRG00005007107	26.8018	-0.756841	0.381062	-1.98614	0.0470181	0.460302	38.7861	29.6334	39.8873	28.9701	34.83	15.853	10.925	12.4346	21.4812	35.2174	EEF1A lysine methyltransferase 2 [Source:HGNC Symbol;Acc:HGNC:33787]
HTRA1	ENSCDRG00005008605	349.99	0.383927	0.193517	1.98395	0.0472618	0.460478	193.931	309.175	321.314	325.777	355.812	381.463	275.311	399.685	526.289	411.143	HtrA serine peptidase 1 [Source:HGNC Symbol;Acc:HGNC:9476]
ENSCDRG00005006822	ENSCDRG00005006822	7.3252	-1.33292	0.671388	-1.98532	0.0471084	0.460478	22.1635	9.87781	7.75585	4.91945	10.2441	7.92651	0	4.737	3.5802	2.04752	nan
CACNG6	ENSCDRG00005002559	11.8477	-1.38641	0.698855	-1.98383	0.0472746	0.460478	44.327	19.7556	17.7277	3.27963	3.4147	6.9357	6.55502	5.32913	7.87644	3.27604	calcium voltage-gated channel auxiliary subunit gamma 6 [Source:NCBI gene;Acc:105103262]
GNL2	ENSCDRG00005009550	138.788	0.389852	0.19633	1.9857	0.0470665	0.460478	132.981	107.668	81.9905	150.863	130.442	148.622	133.285	161.058	174.714	166.259	G protein nucleolar 2 [Source:NCBI gene;Acc:105086931]
ENSCDRG00005012093	ENSCDRG00005012093	98.0499	0.55553	0.280041	1.98375	0.0472839	0.460478	55.4088	75.0714	54.291	130.092	76.4894	94.1273	96.1403	120.201	112.418	166.259	nan
CCDC200	ENSCDRG00005012313	5.81244	-1.76529	0.889892	-1.98371	0.0472881	0.460478	22.1635	8.89003	9.97181	2.73303	2.73176	0	2.18501	1.77638	6.44436	1.22851	coiled-coil domain containing 200 [Source:HGNC Symbol;Acc:HGNC:43658]
ZMAT4	ENSCDRG00005009014	11.8692	-1.32071	0.665386	-1.98488	0.047158	0.460478	38.7861	14.8167	23.2676	8.19908	4.09765	3.96326	0	8.88188	9.30851	7.37108	zinc finger matrin-type 4 [Source:NCBI gene;Acc:105086422]
UBASH3B	ENSCDRG00005013145	180.002	0.425872	0.214606	1.98443	0.0472077	0.460478	144.063	119.522	188.356	156.876	155.028	146.64	275.311	227.376	157.529	229.323	ubiquitin associated and SH3 domain containing B [Source:NCBI gene;Acc:105094505]
SINHCAF	ENSCDRG00005013939	26.7503	0.740149	0.372877	1.98497	0.0471481	0.460478	33.2453	19.7556	5.5399	25.6904	19.8053	36.6601	32.7751	30.7905	32.9378	30.3033	SIN3-HDAC complex associated factor [Source:NCBI gene;Acc:105103944]
ENSCDRG00005001147	ENSCDRG00005001147	455.108	0.567728	0.286347	1.98265	0.0474061	0.46076	182.849	307.2	345.69	507.249	480.107	453.793	288.421	704.037	518.413	763.316	transmembrane p24 trafficking protein 10 [Source:NCBI gene;Acc:105086087]
ENSCDRG00005002020	ENSCDRG00005002020	25.9203	-0.7434	0.374986	-1.98248	0.047426	0.46076	60.9497	28.6457	35.4553	20.2244	21.8541	23.7795	21.8501	14.211	17.901	14.3327	leucine-rich repeat-containing protein PRAME-like [Source:NCBI gene;Acc:105096959]
CD53	ENSCDRG00005001319	58.519	0.892884	0.450249	1.98309	0.0473576	0.46076	44.327	39.5112	35.4553	42.6352	44.3912	154.567	15.295	47.9622	113.134	47.912	CD53 molecule [Source:NCBI gene;Acc:105100459]
EML3	ENSCDRG00005005818	127.728	0.546621	0.27573	1.98245	0.0474291	0.46076	121.899	131.375	95.2862	92.3763	79.2211	216.988	201.021	94.148	144.64	100.329	EMAP like 3 [Source:NCBI gene;Acc:105091488]
DAZAP2	ENSCDRG00005013743	114.125	0.528194	0.266513	1.98187	0.0474935	0.461113	27.7044	106.68	80.8825	133.372	103.807	177.356	104.88	121.978	142.492	142.098	DAZ associated protein 2 [Source:NCBI gene;Acc:105107152]
ENSCDRG00005006140	ENSCDRG00005006140	15.4877	0.879017	0.443628	1.98142	0.0475436	0.461328	11.0818	17.7801	9.97181	7.65247	8.19529	27.7428	21.8501	12.4346	22.1972	15.9707	zinc finger and SCAN domain-containing protein 4-like [Source:NCBI gene;Acc:105101776]
GNA13	ENSCDRG00005020206	100.352	0.361901	0.182677	1.9811	0.0475804	0.461412	60.9497	98.7781	77.5585	91.283	101.075	107.008	111.435	115.464	131.035	108.928	G protein subunit alpha 13 [Source:HGNC Symbol;Acc:HGNC:4381]
DGCR2	ENSCDRG00005019475	527.428	-0.290975	0.146974	-1.97978	0.0477286	0.462576	753.559	551.182	541.802	529.66	539.523	460.729	568.102	506.859	411.723	411.143	DiGeorge syndrome critical region gene 2 [Source:HGNC Symbol;Acc:HGNC:2845]
ANGEL1	ENSCDRG00005001736	169.679	-0.295346	0.149292	-1.97831	0.047894	0.463678	216.094	159.033	200.544	177.647	189.175	133.76	157.321	150.992	146.788	165.44	angel homolog 1 [Source:NCBI gene;Acc:105086072]
ENSCDRG00005020773	ENSCDRG00005020773	23.8391	0.820158	0.414631	1.97805	0.0479235	0.463678	22.1635	15.8045	5.5399	24.0506	19.1223	31.706	34.9601	16.5795	30.7897	37.6744	nan
SEC14L3	ENSCDRG00005013909	10.0442	-1.53682	0.776949	-1.97802	0.0479268	0.463678	38.7861	17.7801	13.2958	4.91945	2.04882	0.990814	6.55502	8.28976	5.72832	2.04752	SEC14 like lipid binding 3 [Source:NCBI gene;Acc:105099443]
SFPQ	ENSCDRG00005021228	301.762	0.369691	0.186985	1.97712	0.0480279	0.463787	188.39	320.041	198.328	312.111	284.786	420.105	288.421	310.274	337.255	357.907	splicing factor proline and glutamine rich [Source:HGNC Symbol;Acc:HGNC:10774]
APOB	ENSCDRG00005005937	35.0933	-0.955133	0.483143	-1.97692	0.0480509	0.463787	127.44	29.6334	39.8873	16.9448	25.9518	18.8255	24.0351	23.0929	30.7897	14.3327	apolipoprotein B [Source:NCBI gene;Acc:105095730]
GRAP	ENSCDRG00005017736	86.4875	0.635371	0.321349	1.9772	0.0480192	0.463787	66.4905	103.717	58.7229	46.4614	61.4647	162.494	137.655	75.1999	91.6531	61.0162	GRB2 related adaptor protein [Source:NCBI gene;Acc:105100562]
CSPG4	ENSCDRG00005003788	127.487	-0.545791	0.276043	-1.97719	0.0480197	0.463787	182.849	163.972	171.737	94.5627	142.735	127.815	146.395	68.0944	112.418	64.2922	chondroitin sulfate proteoglycan 4 [Source:NCBI gene;Acc:105087236]
ZNF711	ENSCDRG00005021254	74.7758	-0.608716	0.308062	-1.97595	0.0481599	0.463809	121.899	56.3035	53.183	140.477	85.3676	57.4672	39.3301	66.3181	56.5671	70.8443	zinc finger protein 711 [Source:NCBI gene;Acc:105091813]
TGM1	ENSCDRG00005017488	17.0293	-1.30959	0.66278	-1.9759	0.0481659	0.463809	49.8679	13.8289	43.2112	4.91945	11.61	15.853	8.74003	9.47401	10.7406	2.04752	transglutaminase 1 [Source:HGNC Symbol;Acc:HGNC:11777]
DLX1	ENSCDRG00005000721	9.12266	-1.25274	0.633982	-1.97599	0.0481561	0.463809	5.54088	23.7067	15.5117	4.37284	15.7076	6.9357	0	5.32913	7.1604	6.96158	distal-less homeobox 1 [Source:NCBI gene;Acc:105091092]
RBP4	ENSCDRG00005014655	55.5155	0.477821	0.241754	1.97648	0.048101	0.463809	16.6226	43.4624	46.5351	58.4867	55.3182	69.357	65.5502	67.5023	62.2954	70.0253	retinol binding protein 4 [Source:NCBI gene;Acc:105084239]
ENSCDRG00005008205	ENSCDRG00005008205	37.9135	-0.610611	0.309124	-1.97529	0.048235	0.464132	27.7044	35.5601	44.3192	55.7537	62.8306	23.7795	24.0351	34.3433	42.9624	27.8463	nan
DNAH2	ENSCDRG00005009679	91.7034	-0.755137	0.382327	-1.97511	0.048256	0.464132	188.39	130.387	160.657	50.8343	49.1717	57.4672	102.695	52.6992	78.0483	46.6835	dynein axonemal heavy chain 2 [Source:HGNC Symbol;Acc:HGNC:2948]
PRRC2B	ENSCDRG00005006141	2266.94	-0.327462	0.165834	-1.97464	0.0483093	0.464374	2953.29	2235.35	2704.58	2166.74	2556.93	1755.72	2807.73	2042.24	1656.92	1789.94	proline rich coiled-coil 2B [Source:NCBI gene;Acc:105085166]
APOE	ENSCDRG00005006223	2417.78	0.318583	0.161369	1.97425	0.0483532	0.46438	1806.33	2452.66	2375.51	2290.28	1817.31	2473.07	3329.95	2329.42	3148.43	2154.81	apolipoprotein E [Source:NCBI gene;Acc:105095464]
VPS37A	ENSCDRG00005019806	93.4651	0.452715	0.229323	1.97413	0.0483664	0.46438	94.1949	54.328	78.6665	89.0966	85.3676	90.1641	74.2902	123.754	114.566	130.222	VPS37A subunit of ESCRT-I [Source:NCBI gene;Acc:105102366]
CPLX1	ENSCDRG00005006266	60.6735	-0.498679	0.252645	-1.97383	0.0484009	0.46444	72.0314	68.1569	69.8027	66.6858	77.1723	27.7428	65.5502	62.1732	51.5549	45.8645	complexin 1 [Source:NCBI gene;Acc:105100799]
PI15	ENSCDRG00005013033	8.96071	-1.83487	0.930168	-1.97262	0.0485392	0.465495	49.8679	4.93891	12.1878	2.73303	1.36588	3.96326	8.74003	0.592125	3.5802	1.63802	peptidase inhibitor 15 [Source:NCBI gene;Acc:105088544]
THSD1	ENSCDRG00005021592	28.1073	0.7456	0.378077	1.97209	0.0485998	0.465805	16.6226	25.6823	25.4835	18.038	19.8053	45.5774	10.925	29.6063	50.8388	38.4934	thrombospondin type 1 domain containing 1 [Source:HGNC Symbol;Acc:HGNC:17754]
WDR24	ENSCDRG00005012617	42.6714	0.67838	0.344045	1.97178	0.0486349	0.465869	66.4905	30.6212	23.2676	24.0506	28.6835	58.458	78.6603	32.5669	40.0982	43.817	WD repeat domain 24 [Source:NCBI gene;Acc:105098442]
CARD19	ENSCDRG00005010157	22.074	-0.862428	0.437509	-1.97122	0.0486982	0.466205	44.327	32.5968	36.5633	13.6651	20.4882	15.853	4.37001	20.1323	20.0491	12.6946	caspase recruitment domain family member 19 [Source:HGNC Symbol;Acc:HGNC:28148]
CYP4F3	ENSCDRG00005021576	14.025	-1.22271	0.620445	-1.9707	0.0487579	0.466504	33.2453	31.609	19.9436	4.37284	12.2929	12.8806	0	10.6583	7.87644	7.37108	docosahexaenoic acid omega-hydroxylase CYP4F3-like [Source:NCBI gene;Acc:105105129]
TSTD1	ENSCDRG00005015529	9.89638	1.07383	0.545254	1.96941	0.0489061	0.467651	5.54088	9.87781	4.43192	4.37284	6.82941	15.853	17.4801	11.2504	17.185	6.14257	thiosulfate sulfurtransferase like domain containing 1 [Source:HGNC Symbol;Acc:HGNC:35410]
DLL4	ENSCDRG00005000068	66.2942	0.629311	0.31968	1.96856	0.0490034	0.468308	60.9497	42.4746	48.7511	48.1012	62.8306	144.659	50.2552	48.5543	77.3323	79.0344	delta like canonical Notch ligand 4 [Source:NCBI gene;Acc:105096864]
CES5A	ENSCDRG00005002042	27.8863	-0.885709	0.450288	-1.96698	0.0491852	0.469773	60.9497	15.8045	53.183	36.6225	15.7076	21.7979	30.5901	16.5795	15.7529	11.8756	carboxylesterase 5A [Source:HGNC Symbol;Acc:HGNC:26459]
TSPAN33	ENSCDRG00005000117	400.715	-0.27202	0.138329	-1.96647	0.0492448	0.470069	376.78	386.222	432.112	507.796	483.522	368.583	299.346	381.921	394.538	376.335	tetraspanin 33 [Source:NCBI gene;Acc:105085375]
SASH3	ENSCDRG00005008177	25.0475	0.919738	0.46815	1.96462	0.0494581	0.471606	11.0818	32.5968	12.1878	12.0253	17.0735	65.3937	19.6651	24.2771	36.518	19.6562	SAM and SH3 domain containing 3 [Source:NCBI gene;Acc:105098823]
TMEM232	ENSCDRG00005007754	18.3943	-1.03797	0.528595	-1.96364	0.049572	0.471606	0	34.5723	53.183	18.5846	14.3418	8.91733	15.295	17.7638	11.4566	9.82811	transmembrane protein 232 [Source:NCBI gene;Acc:105095411]
RPAP2	ENSCDRG00005002720	75.8811	0.46671	0.237593	1.96433	0.0494921	0.471606	49.8679	62.2302	52.075	88.0034	62.8306	82.2376	69.9202	83.4897	93.0851	115.071	RNA polymerase II associated protein 2 [Source:NCBI gene;Acc:105085405]
H6PD	ENSCDRG00005012021	132.112	0.606159	0.308636	1.96399	0.0495311	0.471606	149.604	119.522	97.5022	83.6306	79.9041	279.41	187.911	100.661	118.147	104.833	hexose-6-phosphate dehydrogenase/glucose 1-dehydrogenase [Source:HGNC Symbol;Acc:HGNC:4795]
ENSCDRG00005017171	ENSCDRG00005017171	48.4509	-0.695321	0.354196	-1.96309	0.0496352	0.471606	132.981	55.3157	48.7511	32.7963	40.2935	37.6509	37.1451	30.1984	41.5303	27.8463	nan
TAF8	ENSCDRG00005006712	54.9099	-0.506173	0.257653	-1.96455	0.049466	0.471606	38.7861	83.9614	81.9905	54.6605	60.0988	57.4672	32.7751	42.0409	49.4067	47.912	TATA-box binding protein associated factor 8 [Source:HGNC Symbol;Acc:HGNC:17300]
ENSCDRG00005018840	ENSCDRG00005018840	303.209	-0.393942	0.200666	-1.96317	0.0496264	0.471606	265.962	276.579	393.333	416.513	357.178	195.19	345.231	306.129	212.664	263.311	nan
APLP2	ENSCDRG00005008495	1767.25	0.316188	0.161031	1.96352	0.0495853	0.471606	1213.45	1335.48	1675.26	1828.39	1801.6	1607.1	1979.62	2293.3	1699.16	2239.17	amyloid beta precursor like protein 2 [Source:HGNC Symbol;Acc:HGNC:598]
LCP2	ENSCDRG00005006345	104.334	0.63268	0.322383	1.96251	0.0497028	0.471976	88.6541	90.8759	114.122	60.1266	56.0012	205.099	150.765	75.1999	126.739	75.7583	lymphocyte cytosolic protein 2 [Source:NCBI gene;Acc:105089386]
ENSCDRG00005001329	ENSCDRG00005001329	38.5703	-0.65484	0.333813	-1.9617	0.0497975	0.472303	16.6226	45.4379	49.8591	77.0713	41.6594	19.8163	30.5901	34.3433	35.0859	35.2174	nan
CCR5	ENSCDRG00005005900	29.8292	0.954225	0.486431	1.96169	0.0497989	0.472303	11.0818	38.5235	7.75585	28.4235	12.2929	62.4213	39.3301	29.6063	50.8388	18.0182	C-C motif chemokine receptor 5 [Source:NCBI gene;Acc:105103475]
PYCARD	ENSCDRG00005014316	24.0067	0.938424	0.478427	1.96148	0.0498235	0.472303	27.7044	23.7067	9.97181	13.6651	10.2441	53.504	43.7001	26.0535	17.185	14.3327	apoptosis-associated speck-like protein containing a CARD [Source:NCBI gene;Acc:105089723]
AP1S2	ENSCDRG00005013631	990.367	0.577129	0.294565	1.95926	0.0500822	0.473192	598.415	413.88	691.379	1337.54	927.434	804.541	854.338	1507.55	1074.06	1694.53	adaptor related protein complex 1 subunit sigma 2 [Source:HGNC Symbol;Acc:HGNC:560]
TMX1	ENSCDRG00005001254	88.1681	0.507233	0.258773	1.96015	0.0499787	0.473192	22.1635	74.0836	79.7745	79.2577	96.9776	110.971	69.9202	105.398	134.615	108.519	thioredoxin related transmembrane protein 1 [Source:NCBI gene;Acc:105091415]
ENSCDRG00005003559	ENSCDRG00005003559	128.16	-0.375269	0.191614	-1.95846	0.0501761	0.473192	72.0314	152.118	173.953	161.795	152.296	115.925	93.9553	118.425	123.159	117.937	proteasome activator subunit 3 interacting protein 1 [Source:HGNC Symbol;Acc:HGNC:29856]
DPYD	ENSCDRG00005001178	144.325	0.513463	0.262083	1.95916	0.0500943	0.473192	155.145	143.228	94.1782	142.117	66.9282	241.759	146.395	139.149	174.714	139.641	dihydropyrimidine dehydrogenase [Source:HGNC Symbol;Acc:HGNC:3012]
SLC26A11	ENSCDRG00005017682	1873.86	-0.432906	0.221026	-1.95862	0.0501576	0.473192	2238.51	1663.42	2327.86	2423.65	2112.34	909.567	1822.3	2079.54	1178.6	1982.82	solute carrier family 26 member 11 [Source:NCBI gene;Acc:105106253]
HM13	ENSCDRG00005015857	113.662	0.402274	0.205386	1.95863	0.0501567	0.473192	33.2453	102.729	109.69	117.52	107.222	137.723	133.285	133.228	123.159	138.822	histocompatibility minor 13 [Source:NCBI gene;Acc:105100818]
MAFB	ENSCDRG00005009652	70.9727	0.828847	0.423189	1.95858	0.0501625	0.473192	60.9497	76.0591	42.1032	35.5293	42.3423	180.328	96.1403	42.0409	100.246	33.9889	MAF bZIP transcription factor B [Source:HGNC Symbol;Acc:HGNC:6408]
MPZL1	ENSCDRG00005005443	79.5108	0.419451	0.214086	1.95926	0.0500819	0.473192	55.4088	66.1813	75.3426	83.084	53.9523	76.2927	113.62	95.9243	82.3446	92.9575	myelin protein zero like 1 [Source:HGNC Symbol;Acc:HGNC:7226]
ENSCDRG00005017330	ENSCDRG00005017330	26.6068	0.761965	0.388824	1.95966	0.050035	0.473192	22.1635	18.7678	16.6197	16.3982	23.9029	45.5774	45.8851	30.1984	32.2218	14.3327	nan
ENSCDRG00005005808	ENSCDRG00005005808	45.8132	-0.532126	0.271877	-1.95723	0.0503205	0.474281	72.0314	68.1569	56.5069	39.9022	38.9276	36.6601	37.1451	32.5669	42.2463	33.9889	nan
ENSCDRG00005011381	ENSCDRG00005011381	10.8664	-1.42821	0.729836	-1.9569	0.0503593	0.474375	33.2453	17.7801	15.5117	0.546605	13.6588	5.94488	6.55502	3.55275	8.59248	3.27604	nan
RNF7	ENSCDRG00005009202	47.7253	0.58902	0.301199	1.95559	0.050514	0.475016	16.6226	52.3524	22.1596	48.1012	43.7082	48.5499	58.9952	69.2787	51.5549	65.9302	ring finger protein 7 [Source:NCBI gene;Acc:105086323]
ENSCDRG00005016437	ENSCDRG00005016437	126.155	-0.424226	0.216919	-1.95569	0.0505014	0.475016	177.308	116.558	175.061	136.651	118.832	89.1733	148.58	120.201	86.6408	92.548	branched chain keto acid dehydrogenase E1 subunit alpha [Source:NCBI gene;Acc:105093370]
KIF3C	ENSCDRG00005011518	953.613	-0.374164	0.191296	-1.95594	0.0504717	0.475016	1130.34	778.372	1208.81	1264.3	1001.87	562.782	948.293	1047.47	736.805	857.093	kinesin family member 3C [Source:NCBI gene;Acc:105098507]
ENSCDRG00005007892	ENSCDRG00005007892	54.4609	0.731953	0.374377	1.95512	0.0505684	0.475256	55.4088	42.4746	32.1314	37.7157	39.6106	128.806	67.7352	46.1858	65.8756	28.6653	nan
TLR7	ENSCDRG00005010320	50.4259	0.743424	0.380599	1.9533	0.0507838	0.475417	11.0818	55.3157	33.2394	47.008	35.5129	115.925	30.5901	47.37	73.7521	54.4641	toll like receptor 7 [Source:NCBI gene;Acc:105100614]
SRGN	ENSCDRG00005006717	34.7852	0.941404	0.482084	1.95278	0.0508456	0.475417	22.1635	20.7434	13.2958	28.4235	34.147	95.1181	10.925	26.6456	58.7152	37.6744	serglycin [Source:HGNC Symbol;Acc:HGNC:9361]
P4HA1	ENSCDRG00005012192	116.277	0.544562	0.278859	1.95282	0.0508408	0.475417	72.0314	106.68	80.8825	89.6432	122.246	155.558	54.6252	140.334	176.146	164.621	prolyl 4-hydroxylase subunit alpha 1 [Source:NCBI gene;Acc:105092471]
ATXN1L	ENSCDRG00005007961	87.4876	-0.453894	0.232407	-1.95302	0.0508175	0.475417	110.818	105.693	124.094	73.7917	94.2458	102.054	63.3652	59.8047	75.9002	65.1112	ataxin 1 like [Source:HGNC Symbol;Acc:HGNC:33279]
PGAP2	ENSCDRG00005001795	24.2491	-0.935638	0.478906	-1.9537	0.050737	0.475417	55.4088	37.5357	37.6713	15.8515	18.4394	20.8071	2.18501	12.4346	25.7774	16.3802	post-GPI attachment to proteins 2 [Source:HGNC Symbol;Acc:HGNC:17893]
PACSIN2	ENSCDRG00005005173	195.524	-0.312985	0.160259	-1.95299	0.0508203	0.475417	155.145	224.226	237.108	229.028	229.468	166.457	146.395	174.677	216.244	176.496	protein kinase C and casein kinase substrate in neurons 2 [Source:NCBI gene;Acc:105091869]
LAMP5	ENSCDRG00005006870	6.97946	-1.4817	0.758109	-1.95447	0.0506458	0.475417	22.1635	15.8045	5.5399	2.73303	7.51235	4.95407	0	1.77638	6.44436	2.86653	lysosomal associated membrane protein family member 5 [Source:NCBI gene;Acc:105101275]
ENSCDRG00005022402	ENSCDRG00005022402	215.179	0.498732	0.255277	1.95369	0.0507378	0.475417	88.6541	236.08	209.408	149.77	190.541	261.575	393.301	216.718	219.824	185.915	WASH complex subunit 1 [Source:HGNC Symbol;Acc:HGNC:24361]
STC1	ENSCDRG00005016415	7.52385	-1.52263	0.779152	-1.95421	0.0506766	0.475417	22.1635	17.7801	13.2958	3.27963	1.36588	1.98163	2.18501	5.92125	3.5802	3.68554	stanniocalcin 1 [Source:NCBI gene;Acc:105102439]
GPR160	ENSCDRG00005005273	6.88392	-1.79052	0.917468	-1.95159	0.0509874	0.4755	38.7861	9.87781	1.10798	4.91945	1.36588	2.97244	2.18501	4.14488	1.43208	2.04752	G protein-coupled receptor 160 [Source:NCBI gene;Acc:105085959]
TMEM139	ENSCDRG00005007023	15.6549	-1.22948	0.630098	-1.95124	0.051028	0.4755	60.9497	18.7678	9.97181	8.74568	13.6588	2.97244	19.6651	7.69763	10.0246	4.09505	transmembrane protein 139 [Source:HGNC Symbol;Acc:HGNC:22058]
ZNF541	ENSCDRG00005001169	12.3954	-1.4435	0.739686	-1.9515	0.0509971	0.4755	44.327	14.8167	25.4835	2.18642	6.14647	0.990814	8.74003	8.88188	7.87644	4.50455	zinc finger protein 541 [Source:HGNC Symbol;Acc:HGNC:25294]
AP2A2	ENSCDRG00005010348	497.802	-0.227721	0.116686	-1.95157	0.0509892	0.4755	509.761	486.976	565.069	561.363	553.182	443.885	506.922	478.437	397.402	475.025	adaptor related protein complex 2 subunit alpha 2 [Source:HGNC Symbol;Acc:HGNC:562]
ITGAE	ENSCDRG00005014621	95.5094	-0.439806	0.225393	-1.95129	0.0510229	0.4755	94.1949	119.522	152.901	87.4568	94.2458	62.4213	85.2153	79.3448	99.5295	80.2629	integrin subunit alpha E [Source:HGNC Symbol;Acc:HGNC:6147]
DPYS	ENSCDRG00005021042	9.5358	-1.63812	0.839102	-1.95223	0.0509115	0.4755	49.8679	6.91447	2.21596	2.73303	12.9759	0.990814	6.55502	5.32913	5.72832	2.04752	dihydropyrimidinase [Source:HGNC Symbol;Acc:HGNC:3013]
CD207	ENSCDRG00005011074	10.6337	-1.60884	0.824697	-1.95083	0.0510773	0.475689	27.7044	7.90225	29.9154	1.63982	12.2929	0.990814	13.11	2.96063	8.59248	1.22851	CD207 molecule [Source:HGNC Symbol;Acc:HGNC:17935]
CLDND1	ENSCDRG00005002598	160.236	0.538826	0.276458	1.94903	0.0512913	0.476618	105.277	133.35	106.366	168.354	138.637	208.071	85.2153	225.6	154.665	276.825	claudin domain containing 1 [Source:HGNC Symbol;Acc:HGNC:1322]
RTN4IP1	ENSCDRG00005009990	62.8937	-0.619234	0.317651	-1.94942	0.0512453	0.476618	132.981	80.9981	66.4788	60.6732	52.5865	48.5499	17.4801	54.4755	59.4313	55.2831	reticulon 4 interacting protein 1 [Source:NCBI gene;Acc:105097133]
ENSCDRG00005001965	ENSCDRG00005001965	514.021	-0.657535	0.337249	-1.9497	0.0512115	0.476618	1002.9	450.428	742.346	448.763	502.645	209.062	830.303	368.302	282.836	302.624	nan
SLC46A2	ENSCDRG00005005137	12.4812	-1.00363	0.514941	-1.94902	0.0512929	0.476618	22.1635	19.7556	24.3755	9.83889	7.51235	10.899	10.925	8.28976	5.72832	5.32356	solute carrier family 46 member 2 [Source:HGNC Symbol;Acc:HGNC:16055]
OIT3	ENSCDRG00005011975	19.4404	-0.968056	0.497021	-1.94772	0.0514489	0.477557	60.9497	15.8045	19.9436	12.5719	26.6347	7.92651	4.37001	12.4346	18.617	15.1517	oncoprotein induced transcript 3 [Source:NCBI gene;Acc:105092474]
TCN2	ENSCDRG00005013651	127.596	0.451553	0.23184	1.94769	0.051452	0.477557	121.899	115.57	86.4224	113.147	105.173	216.988	115.805	115.464	170.417	115.071	transcobalamin 2 [Source:HGNC Symbol;Acc:HGNC:11653]
FABP7	ENSCDRG00005001881	37.6613	0.792152	0.407091	1.94589	0.0516684	0.479162	38.7861	26.6701	18.8356	34.9827	21.1712	85.21	39.3301	36.1197	55.8511	19.6562	fatty acid binding protein 7 [Source:NCBI gene;Acc:105088360]
TEKT3	ENSCDRG00005013674	22.441	-0.930181	0.478114	-1.94552	0.0517123	0.479162	55.4088	29.6334	39.8873	10.9321	16.3906	16.8438	8.74003	18.948	18.617	9.0091	tektin 3 [Source:HGNC Symbol;Acc:HGNC:14293]
PLEKHA2	ENSCDRG00005011341	95.9787	0.624975	0.321205	1.94572	0.0516884	0.479162	38.7861	76.0591	88.6383	61.7664	103.124	196.181	131.1	82.3054	116.714	65.1112	pleckstrin homology domain containing A2 [Source:HGNC Symbol;Acc:HGNC:14336]
ZSWIM8	ENSCDRG00005015347	272.478	0.415865	0.213819	1.94494	0.051782	0.479268	188.39	228.177	306.91	202.79	230.834	406.234	406.411	252.245	228.417	274.368	zinc finger SWIM-type containing 8 [Source:NCBI gene;Acc:105092455]
TMEM59	ENSCDRG00005010487	228.057	0.479522	0.246545	1.94497	0.0517787	0.479268	110.818	158.045	171.737	263.464	238.346	291.299	159.506	288.365	259.922	339.07	transmembrane protein 59 [Source:NCBI gene;Acc:105092840]
RABL3	ENSCDRG00005009963	39.2938	-0.683471	0.351647	-1.94363	0.05194	0.47936	49.8679	51.3646	47.6431	49.7411	48.4888	21.7979	6.55502	36.1197	35.0859	46.274	RAB, member of RAS oncogene family like 3 [Source:NCBI gene;Acc:105090312]
SMIM15	ENSCDRG00005008061	27.1673	0.845779	0.435219	1.94334	0.0519753	0.47936	0	24.6945	8.86383	32.7963	23.22	48.5499	30.5901	27.2378	45.8265	29.8938	small integral membrane protein 15 [Source:NCBI gene;Acc:105084732]
ANKRD55	ENSCDRG00005006260	55.2758	0.48735	0.250889	1.94249	0.0520779	0.47936	55.4088	34.5723	52.075	47.008	45.757	74.3111	52.4402	63.3574	47.9747	79.8534	ankyrin repeat domain 55 [Source:NCBI gene;Acc:105087136]
POLR2I	ENSCDRG00005011348	37.1186	-0.544286	0.280138	-1.94292	0.0520255	0.47936	44.327	37.5357	62.0468	40.4488	36.1959	25.7612	32.7751	36.1197	29.3576	26.6178	RNA polymerase II subunit I [Source:NCBI gene;Acc:105088075]
ENSCDRG00005001870	ENSCDRG00005001870	9.63645	-1.41511	0.728336	-1.94293	0.0520245	0.47936	16.6226	18.7678	27.6995	2.73303	5.46353	3.96326	2.18501	8.28976	8.59248	2.04752	nan
CD72	ENSCDRG00005005527	10.6348	-1.45652	0.749934	-1.9422	0.0521126	0.47936	38.7861	9.87781	23.2676	4.91945	2.73176	3.96326	8.74003	7.10551	5.72832	1.22851	CD72 molecule [Source:HGNC Symbol;Acc:HGNC:1696]
TMIE	ENSCDRG00005006341	62.2199	-0.453593	0.233427	-1.94319	0.0519934	0.47936	88.6541	62.2302	69.8027	78.7111	60.0988	43.5958	74.2902	55.0677	42.2463	47.5025	transmembrane inner ear [Source:HGNC Symbol;Acc:HGNC:30800]
SPNS1	ENSCDRG00005005916	74.2016	0.582821	0.299877	1.94353	0.0519517	0.47936	38.7861	80.0103	76.4506	50.2877	44.3912	100.072	137.655	59.2125	63.0115	92.1385	sphingolipid transporter 1 (putative) [Source:NCBI gene;Acc:105102784]
IQGAP1	ENSCDRG00005012876	360.238	0.53151	0.273579	1.94281	0.0520395	0.47936	160.685	355.601	179.493	395.742	370.154	483.517	277.496	341.656	569.968	468.064	IQ motif containing GTPase activating protein 1 [Source:NCBI gene;Acc:105094701]
ENSCDRG00005008556	ENSCDRG00005008556	537.494	-0.355672	0.183121	-1.94228	0.0521028	0.47936	748.019	407.954	591.661	669.045	607.134	355.702	574.657	480.806	437.5	502.462	nan
ENSCDRG00005006886	ENSCDRG00005006886	1824.83	-1.59479	0.820589	-1.94348	0.0519587	0.47936	7297.34	2044.71	2954.98	308.285	1105	245.722	2038.61	699.892	1138.5	415.238	nan
FAM135B	ENSCDRG00005008527	104.69	-0.405527	0.208901	-1.94124	0.0522296	0.4799	105.277	150.143	144.037	94.5627	99.0264	85.21	109.25	81.1212	81.6285	96.6431	family with sequence similarity 135 member B [Source:HGNC Symbol;Acc:HGNC:28029]
GRIN2B	ENSCDRG00005011662	181.631	-0.411161	0.211802	-1.94125	0.0522283	0.4799	205.013	167.923	221.596	206.07	230.151	121.87	227.241	172.309	108.122	156.021	glutamate ionotropic receptor NMDA type subunit 2B [Source:HGNC Symbol;Acc:HGNC:4586]
CD47	ENSCDRG00005000602	76.8687	0.49483	0.254977	1.94068	0.0522966	0.480247	60.9497	54.328	58.7229	85.2704	61.4647	84.2192	50.2552	93.5558	102.394	117.528	CD47 molecule [Source:HGNC Symbol;Acc:HGNC:1682]
SYS1	ENSCDRG00005015013	33.2232	-0.516367	0.26623	-1.93955	0.0524341	0.481241	44.327	38.5235	40.9952	38.809	34.147	23.7795	30.5901	30.1984	22.1972	28.6653	SYS1 golgi trafficking protein [Source:NCBI gene;Acc:105087822]
VPS52	ENSCDRG00005021653	221.94	0.302537	0.156013	1.93918	0.052479	0.481385	238.258	177.801	210.516	178.74	194.638	248.694	301.531	211.981	211.948	245.293	VPS52 subunit of GARP complex [Source:NCBI gene;Acc:105101390]
ARL14EP	ENSCDRG00005020128	34.1788	0.709822	0.366108	1.93883	0.0525219	0.481509	11.0818	13.8289	42.1032	33.8895	23.9029	43.5958	43.7001	52.107	27.2095	50.3691	ADP ribosylation factor like GTPase 14 effector protein [Source:NCBI gene;Acc:105106556]
ANKZF1	ENSCDRG00005000595	88.5072	0.452406	0.233569	1.93693	0.0527543	0.48176	49.8679	75.0714	93.0703	83.6306	61.4647	119.889	139.84	95.3322	83.7766	83.1294	ankyrin repeat and zinc finger peptidyl tRNA hydrolase 1 [Source:HGNC Symbol;Acc:HGNC:25527]
PLCE1	ENSCDRG00005013742	384.154	-0.495476	0.255695	-1.93776	0.0526522	0.48176	343.534	284.481	415.492	708.4	493.083	235.814	227.241	367.71	361.6	404.181	phospholipase C epsilon 1 [Source:NCBI gene;Acc:105084245]
MEN1	ENSCDRG00005013054	135.408	0.307236	0.158583	1.93739	0.0526976	0.48176	99.7358	118.534	119.662	127.359	133.173	164.475	137.655	170.532	142.492	140.46	menin 1 [Source:HGNC Symbol;Acc:HGNC:7010]
ENSCDRG00005019371	ENSCDRG00005019371	6.14915	-2.14332	1.10647	-1.93707	0.0527365	0.48176	22.1635	7.90225	19.9436	0	1.36588	1.98163	0	4.14488	3.5802	0.409505	nan
OR1J2	ENSCDRG00005008230	5.966	-1.67561	0.864843	-1.93747	0.0526878	0.48176	11.0818	5.92669	17.7277	1.63982	7.51235	1.98163	8.74003	1.77638	2.86416	0.409505	olfactory receptor family 1 subfamily J member 2 [Source:HGNC Symbol;Acc:HGNC:8209]
TMPRSS6	ENSCDRG00005007670	13.3758	-1.11762	0.576975	-1.93703	0.0527418	0.48176	27.7044	13.8289	29.9154	4.37284	17.7565	5.94488	6.55502	12.4346	10.7406	4.50455	transmembrane serine protease 6 [Source:NCBI gene;Acc:105101577]
ENSCDRG00005009122	ENSCDRG00005009122	9.46506	-1.6041	0.827785	-1.93782	0.052645	0.48176	44.327	3.95112	14.4037	6.55926	4.09765	1.98163	6.55502	5.92125	6.44436	0.409505	nan
RP2	ENSCDRG00005020995	21.4587	0.760968	0.393576	1.93347	0.0531781	0.481765	27.7044	13.8289	14.4037	15.8515	13.6588	41.6142	10.925	29.0141	22.1972	25.3893	RP2 activator of ARL3 GTPase [Source:HGNC Symbol;Acc:HGNC:10274]
TNPO1	ENSCDRG00005003173	419.51	0.419984	0.217014	1.93528	0.0529555	0.481765	199.472	336.833	352.337	472.813	417.96	452.802	347.416	499.754	474.018	641.694	transportin 1 [Source:HGNC Symbol;Acc:HGNC:6401]
TYRO3	ENSCDRG00005019954	162.032	-0.437333	0.225974	-1.93533	0.0529502	0.481765	127.44	256.823	243.755	145.397	151.613	169.429	137.655	136.781	133.899	117.528	TYRO3 protein tyrosine kinase [Source:NCBI gene;Acc:105096852]
GPR155	ENSCDRG00005001897	120.168	0.438596	0.226895	1.93304	0.0532313	0.481765	88.6541	109.644	93.0703	101.669	118.149	152.585	69.9202	149.216	149.652	169.125	G protein-coupled receptor 155 [Source:NCBI gene;Acc:105097565]
ENSCDRG00005003488	ENSCDRG00005003488	8.75602	-1.21707	0.62967	-1.93287	0.0532528	0.481765	22.1635	15.8045	11.0798	6.01266	6.14647	4.95407	10.925	1.77638	5.01228	3.68554	nan
SLC18B1	ENSCDRG00005021633	41.7962	0.472213	0.243944	1.93575	0.0528989	0.481765	33.2453	37.5357	29.9154	37.7157	34.83	52.5131	50.2552	52.107	50.1228	39.7219	solute carrier family 18 member B1 [Source:HGNC Symbol;Acc:HGNC:21573]
MAP3K11	ENSCDRG00005005057	101.205	0.65521	0.338788	1.93398	0.0531153	0.481765	33.2453	107.668	105.258	65.046	70.3429	138.714	227.241	79.9369	105.974	78.6249	mitogen-activated protein kinase kinase kinase 11 [Source:HGNC Symbol;Acc:HGNC:6850]
ECE1	ENSCDRG00005011473	350.831	0.48245	0.249556	1.93323	0.0532076	0.481765	160.685	368.442	276.995	288.061	354.446	657.901	384.561	306.129	394.538	316.547	endothelin converting enzyme 1 [Source:NCBI gene;Acc:105088862]
RNF208	ENSCDRG00005022243	44.8556	-0.886251	0.457878	-1.93556	0.0529214	0.481765	127.44	43.4624	49.8591	32.2497	41.6594	13.8714	63.3652	36.1197	14.3208	26.2083	ring finger protein 208 [Source:HGNC Symbol;Acc:HGNC:25420]
SPTAN1	ENSCDRG00005002078	4688.15	-0.280254	0.144893	-1.93422	0.0530866	0.481765	4321.89	4444.03	5701.66	5708.2	5518.16	3280.59	4852.9	4737.6	3984.76	4331.74	spectrin alpha, non-erythrocytic 1 [Source:NCBI gene;Acc:105092569]
KRT72	ENSCDRG00005007153	13.4092	-1.5008	0.775356	-1.93563	0.0529134	0.481765	60.9497	11.8534	9.97181	2.18642	16.3906	4.95407	10.925	8.88188	7.1604	0.819009	keratin 8 [Source:NCBI gene;Acc:105094582]
PER1	ENSCDRG00005013843	310.537	0.495621	0.256135	1.935	0.0529908	0.481765	205.013	297.322	331.286	227.934	217.175	435.958	574.657	216.126	279.255	320.642	period circadian regulator 1 [Source:HGNC Symbol;Acc:HGNC:8845]
DCLK3	ENSCDRG00005014456	10.5343	-1.04633	0.541212	-1.93331	0.0531983	0.481765	5.54088	13.8289	11.0798	13.1185	25.2688	4.95407	8.74003	11.2504	7.87644	3.68554	doublecortin like kinase 3 [Source:NCBI gene;Acc:105090701]
ENSCDRG00005006184	ENSCDRG00005006184	12.2859	-0.994185	0.513909	-1.93456	0.0530449	0.481765	16.6226	20.7434	18.8356	16.3982	9.56117	10.899	6.55502	2.3685	11.4566	9.4186	nan
POLR3E	ENSCDRG00005021048	96.7991	-0.419547	0.216987	-1.93351	0.0531732	0.481765	127.44	112.607	141.821	87.4568	86.7335	67.3754	104.88	82.8976	74.4681	82.3104	RNA polymerase III subunit E [Source:HGNC Symbol;Acc:HGNC:30347]
RAB11B	ENSCDRG00005011000	206.928	-0.280954	0.145343	-1.93304	0.0532317	0.481765	188.39	211.385	244.863	235.587	243.127	204.108	201.021	203.099	174.714	162.983	RAB11B, member RAS oncogene family [Source:NCBI gene;Acc:105087584]
VSIG10	ENSCDRG00005016919	42.5743	-0.610929	0.315575	-1.93592	0.0528771	0.481765	72.0314	49.3891	64.2628	24.5972	51.9035	34.6785	30.5901	29.0141	39.3822	29.8938	V-set and immunoglobulin domain containing 10 [Source:HGNC Symbol;Acc:HGNC:26078]
LRRC53	ENSCDRG00005010584	10.104	-1.25082	0.64735	-1.93222	0.0533323	0.482219	33.2453	10.8656	17.7277	6.01266	6.14647	2.97244	6.55502	10.6583	3.5802	3.27604	leucine rich repeat containing 53 [Source:HGNC Symbol;Acc:HGNC:25255]
[truncated: 20,625 more rows]

## Sheet: b
Camel SON basal (control) transcriptome (filtered by average normalized read counts of control samples>0, 21597 genes in total)
[truncated: 21,598 more rows]

[truncated: 6 more sheets: c, d, e, f, g, h]
